# Supplementary material for: Metagenomic Analysis of Anaerobic Microbial Communities Degrading Short-Chain Fatty Acids as Sole Carbon Sources
Source: Microorganisms. 2023 Feb 7;11(2):420. doi: 10.3390/microorganisms11020420 (PMC9959488; doi:10.3390/microorganisms11020420)
Supplement: Supplementary file 1 [file microorganisms-11-00420-s001.zip › Supplementary File 1.pdf]

# Metagenomic analysis of anaerobic microbial communities degrading short-chain fatty acids as sole carbon sources

Daniela Becker <sup>1,2</sup>, Denny Popp <sup>1,3</sup>, Fabian Bonk <sup>1,4</sup>, Sabine Kleinsteuber <sup>1</sup>, Hauke Harms <sup>1</sup> and Florian Centler <sup>1,5\*</sup>

<sup>1</sup> UFZ – Helmholtz Centre for Environmental Research, Department of Environmental Microbiology, Permoserstr. 15, 04318 Leipzig, Germany

<sup>2</sup> Current address: IAV GmbH, Kauffahrtei 23-25, 09120 Chemnitz, Germany

<sup>3</sup> Current address: Institute of Human Genetics, University of Leipzig Medical Center, Philipp-Rosenthal-Str. 55, 04103 Leipzig, Germany

<sup>4</sup> Current address: VERBIO Vereinigte Bioenergie AG, Thura Mark 18, 06780 Zörbig, Germany

<sup>5</sup> Current address: School of Life Sciences, University of Siegen, 57076 Siegen, Germany

\* Correspondence: florian.centler@uni-siegen.de

## Supplementary File 1

### 1. Experimental setup

In this study, a metagenomic approach was applied to explore the microbial communities and functional profiles of AD reactors established in a previous experimental study [1]. Briefly, five reactors were operated under different feeding regimes (continuous and discontinuous) and organic loading rates (OLRs) with a supply of SCFAs (acetate, propionate and butyrate) as the sole carbon sources (Table 1 in main text). Hence, we focused on acetogenesis and methanogenesis, which are often bottlenecks of the AD process. The continuously fed reactors and the discontinuously fed reactors were operated at a hydraulic retention time of 8 days and at two different OLRs (1.55 gCOD/L/d and 4.65 gCOD/L/d). The latter value corresponds to 3.4 gVS/L/d and hence represents a typical agricultural biogas plant with a reported average OLR of 3.2 gVS/L/d (<https://biogas.fnr.de/daten-und-fakten/faustzahlen>, accessed on February 17, 2022), while the former represents a less intensely operated biogas plant. Discontinuous feeding was implemented by applying a singular daily feed pulse (Table 1). For details, see Bonk et al. [1]. Reactors R-2 and R-3 were replicate reactors (biological replicates) with identical process conditions and feeding regimes. Reactors R-1 to R-3 correspond to Experiment 3 described in Bonk et al. [1], and R-4 and R-5 to Experiment 2.

### 2. Process Performance

All reactors reached a stable production phase after the initial startup phase (Figure S1). All low OLR reactors (R-1, R-2, R-3) had a methane production rate between 3.9 and 4.5 L/d in this phase, while both high OLR reactors (R-4, R-5) achieved 10 and 12.6 L/d (Table 1). The average SCFA concentration in all reactors was below 0.36 gCOD/L before feeding. Regardless of the feeding regime (continuous or discontinuous with one pulse feed per day), pH value, methane production rate and microbial biomass concentration were similar (Figure S1), reaching a substrate conversion efficiency of more than 99% [1]. However, an increased OLR led to higher and more fluctuating methane production, more biomass in the reactors, and a slightly decreased pH value. Table 1 in the main text summarizes the process parameters as determined in the last measurement before feeding.

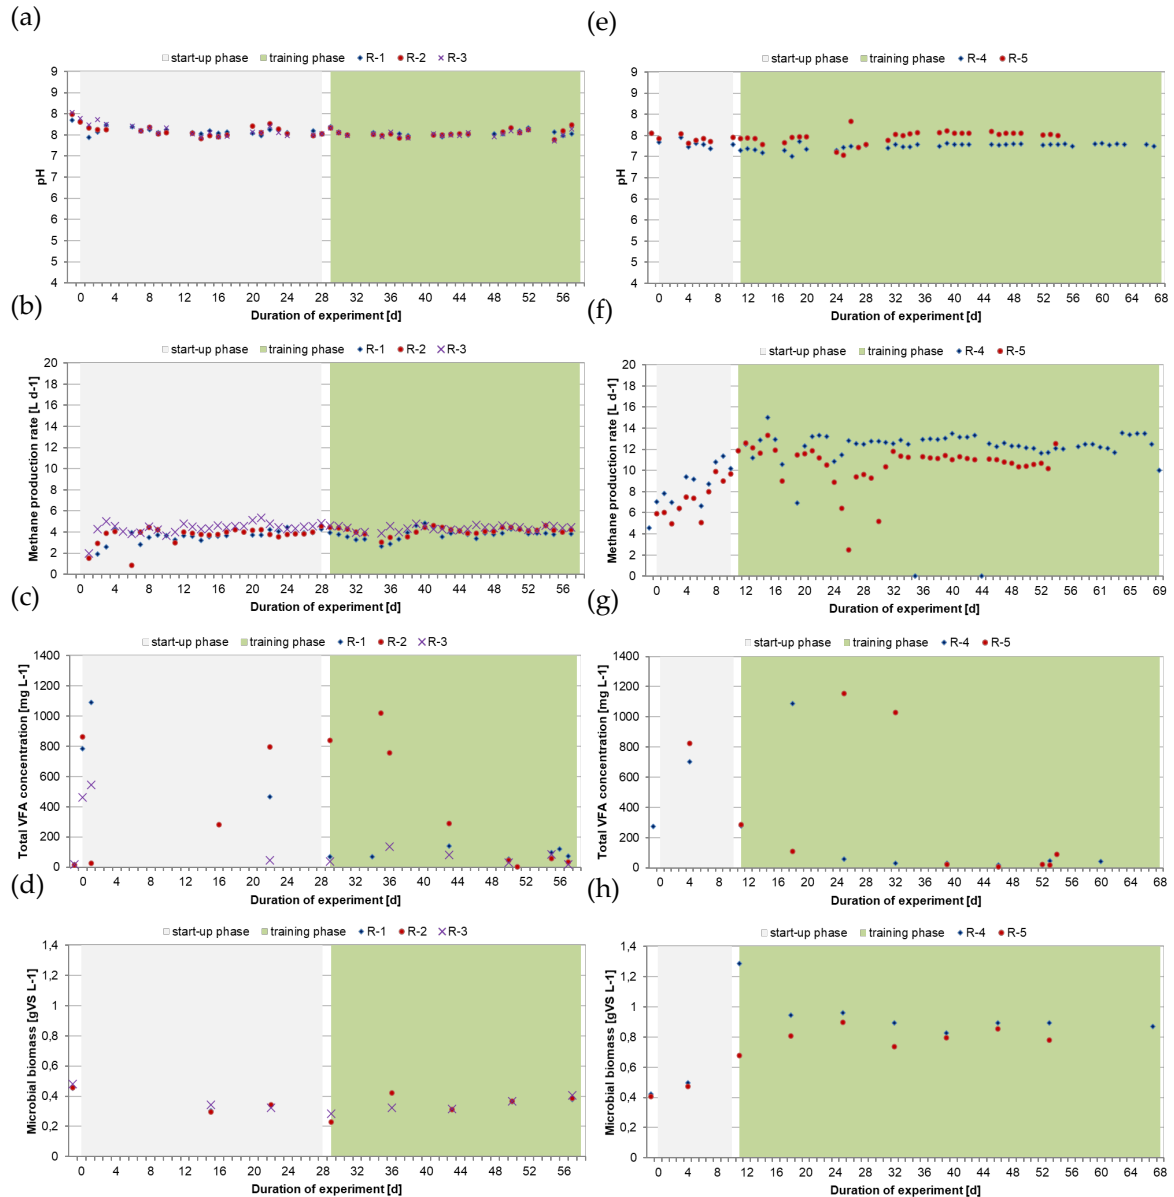

**Figure S1.** Process performance during bioreactor experiments performed earlier [1]. While feeding of the continuously fed reactors R-1 and R-4 was identical in start-up and training phase, for discontinuously fed reactors R-2, R-3, and R-5, feeding was ramped up in the start-up phase and kept constant throughout the training phase to enable the microbial reactor community to adapt to the pulsed feeding regime. Reactors R-1, R-2, and R-3 received an organic loading rate of 1.55 gCOD/L/d (a-d), while R-4 and R-5 received 4.65 gCOD/L/d (e-h). Temporal evolution of pH (a,e), methane production rate (b,f), total volatile fatty acid (VFA) concentration (c,g), and microbial biomass concentration (d,h). Sampling for this study occurred on day 58 for reactors R-1, R-2, and R-3, and on day 54 for reactors R-4 and R-5.

### 3. Representative genes for pathways

Representative genes for selected pathways were taken from [2].

**Table S1.** SCFA (short-chain fatty acid) oxidation pathways, bold entries indicate non-unique enzymes.

| Pathway | Enzyme | EC number | COG | EggNOG | UniProt |
|---------|--------|-----------|-----|--------|---------|
|---------|--------|-----------|-----|--------|---------|

|                                                                                 |                                                                             |                          |                    |             |        |
|---------------------------------------------------------------------------------|-----------------------------------------------------------------------------|--------------------------|--------------------|-------------|--------|
| Acetate oxidation - oxidative carbon monoxide dehydrogenase/acetyl-CoA synthase | NADP-dependent formate dehydrogenase                                        | EC 1.17.1.10             | COG3383            | ENOG4108HIZ | P77908 |
|                                                                                 | Formyltetrahydrofolate synthetase                                           | EC 6.3.4.3               | COG2759            | ENOG4105CKU | P21164 |
|                                                                                 | Methenyltetrahydrofolate cyclohydrolase                                     | EC 3.5.4.9               | COG3404            | ENOG410908R | Q49135 |
|                                                                                 | NADP-dependent methylenetetrahydrofolate dehydrogenase                      | EC 1.5.1.5               | ENOG410XT65        | ENOG4108N1H | P55818 |
|                                                                                 | Ferredoxin-dependent methylenetetrahydrofolate reductase                    | EC 1.5.7.1               |                    |             |        |
|                                                                                 | 5,10-Methylenetetrahydrofolate reductase                                    | EC 1.5.1.20              | COG0685            | ENOG4105SYT | P0AEZ1 |
|                                                                                 | 5-Methyltetrahydrofolate:corrinoid/iron-sulfur protein Co-methyltransferase | EC 2.1.1.258             | COG1410            | ENOG4107VP5 | Q46389 |
|                                                                                 | Carbon monoxide dehydrogenase                                               | EC 1.2.7.4               | COG1151            | ENOG4105CJG | P31896 |
|                                                                                 | CO-methylating acetyl-CoA synthase                                          | EC 2.3.1.169             | COG1152<br>COG1614 | ENOG4105E8X | P27988 |
| Acetate oxidation - reduction of fumarate                                       | Acetate kinase                                                              | EC 2.7.2.1               | COG0282            | ENOG4105C6H | P71104 |
|                                                                                 | Phosphotransacetylase                                                       | EC 2.3.1.8               | COG0280            | ENOG4108IJ2 | A5N801 |
|                                                                                 | Citrate synthase                                                            | EC 2.3.3.1               | COG0372            | ENOG4105BZN | P0ABH7 |
|                                                                                 | Aconitase                                                                   | EC 4.2.1.3               | COG1049            | ENOG4107QIJ | P56418 |
|                                                                                 | Isocitrate dehydrogenase (NADP+-dependent)                                  | EC1.1.1.42               | COG2838            | ENOG4105E9K | P16100 |
|                                                                                 | 2-Oxoglutarate:ferredoxin oxidoreductase                                    | EC 1.2.7.3               | COG1013            | ENOG4105DQU | O53181 |
|                                                                                 | Succinyl-CoA:acetate-CoA transferase                                        | EC 2.8.3.18              | COG0427            | ENOG4105CYC | P38946 |
|                                                                                 | Succinate dehydrogenase                                                     | EC 1.3.5.1               | COG1053            | ENOG4105C00 | O53370 |
|                                                                                 | Fumarate hydratase                                                          | EC 4.2.1.2               | COG0114            | KOG1317     | P07954 |
|                                                                                 | Malate dehydrogenase                                                        | EC 1.1.1.37              | COG0039            | ENOG4105C80 | P61889 |
| Butyrate oxidation                                                              | CoA transferase                                                             | EC 2.8.3.9               | COG0427            | ENOG4105CYC | P33752 |
|                                                                                 | Acetate-CoA transferase beta-subunit                                        |                          | COG2057            | ENOG4107QNJ | P76459 |
|                                                                                 | Butyryl-CoA dehydrogenase                                                   | EC 1.3.8.1               | COG1960            | ENOG4105C1G | A5N5C8 |
|                                                                                 | Crotonase-3-OH-butyryl-CoA dehydratase (3-hydroxybutyryl-CoA dehydratase)   | EC 4.2.1.55              | COG2030            | ENOG4108F01 | C5AZ74 |
|                                                                                 | Acetyl-CoA acetyltransferase                                                | EC 2.3.1.9               | COG0183            | ENOG4105CHU | P76461 |
|                                                                                 | Hydroxybutyryl-CoA dehydrogenase                                            | EC 1.1.1.157             | COG1250            | ENOG4105DYT | P9WNP7 |
|                                                                                 | Phosphotransacetylase                                                       | EC 2.3.1.8               | COG0280            | ENOG4108IJ2 | A5N801 |
|                                                                                 | Acetate kinase                                                              | EC 2.7.2.1               | COG0282            | ENOG4105C6H | P71104 |
| Propionate oxidation                                                            | Pyruvate carboxylase                                                        | EC 6.4.1.1               | COG1038            | KOG0369     | O93918 |
|                                                                                 | Malate dehydrogenase                                                        | EC 1.1.1.37              | COG0039            | ENOG4105C80 | P61889 |
|                                                                                 | Fumarate hydratase                                                          | EC 4.2.1.2               | COG0114            | KOG1317     | P07954 |
|                                                                                 | Fumarate reductase                                                          | EC 1.3.5.4<br>EC 1.3.1.6 | COG3029            | ENOG4108WJH | P0A8Q0 |
|                                                                                 | Succinate dehydrogenase                                                     | EC 1.3.5.1               | COG1053            | ENOG4105C00 | O53370 |
|                                                                                 | Succinyl-CoA synthetase                                                     | EC 6.2.1.4               |                    |             |        |
|                                                                                 | Methylmalonyl-CoA mutase                                                    | EC 5.4.99.2              | COG1884<br>COG2185 | ENOG4105D5P | P27253 |

|                                                                           |                                                                                                                                                             |                              |         |             |            |
|---------------------------------------------------------------------------|-------------------------------------------------------------------------------------------------------------------------------------------------------------|------------------------------|---------|-------------|------------|
|                                                                           | Methylmalonyl-CoA epimerase                                                                                                                                 | EC 5.1.99.1                  | COG0346 | ENOG4108ZVT | Q8VQN0     |
|                                                                           | Methylmalonyl-CoA decarboxylase                                                                                                                             | EC 4.1.1.41<br>(new 7.2.4.3) | COG1024 | ENOG4108M7F | P52045     |
|                                                                           | Propionate-CoA transferase                                                                                                                                  | EC 2.8.3.1                   | COG4670 | ENOG4108IIG | A0AKS6     |
| Syntrophy-specific functional domains of butyrate or propionate oxidation | Extra-cytoplasmic formate dehydrogenase (FDH) alpha subunit, EC 1.17.1.9                                                                                    | EC 1.17.1.9                  | COG0243 | ENOG4107QIW | P32176     |
|                                                                           | FdhE-like protein—tightly connected with FDH                                                                                                                |                              |         |             |            |
|                                                                           | FDH accessory protein—tightly connected with FDH                                                                                                            |                              | COG3058 | ENOG4105F46 | A0A066T1C1 |
|                                                                           | CapA—a membrane-bound complex, a protein involved in capsule or biofilm formation that may facilitate syntrophic growth (also present in acetate oxidizers) |                              |         |             | P19579     |
|                                                                           | FtsW, RodA, SpoVE—membrane-integrated proteins involved in membrane integration, cell division, sporulation, and shape determination                        |                              | COG0772 | ENOG4105CNI | P0ABG4     |
|                                                                           |                                                                                                                                                             |                              | COG0772 | ENOG4105CNI | P0ABG7     |
|                                                                           |                                                                                                                                                             |                              | COG0772 | ENOG4105CNI | Q182Y5     |
|                                                                           | Ribonuclease P involved in tRNA maturation                                                                                                                  | EC 3.1.26.5                  | COG0594 | ENOG4105NVJ | P0A7Y8     |

**Table S2.** Methanogenesis pathways, bold entries indicate non-unique enzymes.

|                  |                                                                    |                     |                                      |                    |        |
|------------------|--------------------------------------------------------------------|---------------------|--------------------------------------|--------------------|--------|
| Hydrogenotrophic | Formylmethanofuran dehydrogenase                                   | EC 1.2.7.12         | COG1153 and<br>COG2218               | arCOG00097         | O27002 |
|                  | Formylmethanofuran-H4MPT formyltransferase                         | EC 2.3.1.101        | COG2037                              | arCOG02695         | P55301 |
|                  | Methenyl-H4MPT cyclohydrolase                                      | EC 3.5.4.27         | COG3252                              | ENOG41068T5        | O85014 |
|                  | F420-dependent methylene-H4MPT dehydrogenase                       | EC 1.5.98.1         | COG1927                              | arCOG04382         | P94951 |
|                  | H2-forming methylene-H4MPT dehydrogenase                           | EC 1.12.98.2        | COG4074<br>(alternative:<br>COG1927) | arCOG03196         | O27211 |
|                  | F420-dependent methylene-H4MPT reductase                           | EC 1.5.98.2         | COG2141                              | arCOG02410         | O27784 |
|                  | Methyl-H4MPT:coenzyme M methyl-transferase                         | EC 2.1.1.86         | COG4063                              | arCOG03221         | O59640 |
|                  | Methyl-CoM reductase                                               | <b>EC 2.8.4.1</b>   | <b>COG4058</b>                       | <b>arCOG04857</b>  | P07962 |
|                  | Heterodisulfide reductase                                          | <b>EC 1.8.98.1</b>  | <b>COG0247</b>                       | <b>arCOG00333</b>  | Q8PVW3 |
| Acetoclastic     | Acetate kinase ( <i>Methanosarcina</i> )                           | <b>EC 2.7.2.1</b>   | <b>COG0282</b>                       | <b>ENOG4105C6H</b> | P71104 |
|                  | Phosphotransacetylase ( <i>Methanosarcina</i> )                    | <b>EC 2.3.1.8</b>   | <b>COG0280</b>                       | <b>ENOG4108IJ2</b> | A5N801 |
|                  | Acetate-CoA ligase/acetate-CoA synthetase ( <i>Methanosaeta</i> )  | EC 6.2.1.1          | COG0365                              | ENOG4108IQF        | P27550 |
|                  | CO-methylating acetyl-CoA synthase                                 | <b>EC 2.3.1.169</b> | COG1152 and<br>COG1614               | <b>ENOG4105E8X</b> | P27988 |
|                  | 5-Methyl H4SPT:corrinoide/iron-sulfur protein Co-methyltransferase | EC 2.1.1.245        | COG1456                              | arCOG01979         | Q8PZ09 |
|                  | Carbon monoxide dehydrogenase                                      | <b>EC 1.2.7.4</b>   | <b>COG1151</b>                       | <b>ENOG4105CJG</b> | P31896 |
|                  | Methyl H4SPT:coenzyme M methyltransferase                          | EC 2.1.1.-          | <b>COG0407</b>                       | <b>arCOG03323</b>  | Q8TII4 |
|                  | Methyl-CoM reductase                                               | <b>EC 2.8.4.1</b>   | <b>COG4058</b>                       | <b>arCOG04857</b>  | P07962 |
|                  | Heterodisulfide reductase                                          | <b>EC 1.8.98.1</b>  | <b>COG0247</b>                       | <b>arCOG00333</b>  | Q8PVW3 |
| met              | Methanol:corrinoide protein Co-methyltransferase                   | EC 2.1.1.90         | ENOG410Y72C                          | arCOG03330         | Q46EH3 |

|                                                                                      |                     |                                              |                   |        |
|--------------------------------------------------------------------------------------|---------------------|----------------------------------------------|-------------------|--------|
| [Methyl-Co(III) corrinoid protein]: coenzyme M methyltransferase                     | EC 2.1.1.246        | <b>COG0407</b>                               | arCOG03324        | Q48949 |
| Methylamine:corrinoid protein Co-methyltransferase                                   | EC 2.1.1.248        | ENOG4110FS3<br>(alternative:<br>ENOG4111MPJ) | arCOG05143        | O30642 |
| Dimethylamine:corrinoid protein Co-methyltransferase                                 | <b>EC 2.1.1.249</b> | COG5012<br>(alternative:<br>ENOG410YBSZ)     | arCOG02030        | O93657 |
| Trimethylamine:corrinoid protein Co-methyltransferase                                | <b>EC 2.1.1.249</b> | COG5012<br>(alternative:<br>COG5598)         | arCOG02028        | O93659 |
| [Methyl-Co(III) methylamine-specific corrinoid protein]:coenzyme M methyltransferase | EC 2.1.1.247        | <b>COG0407</b>                               | <b>arCOG03323</b> | O30640 |
| Methyl-CoM reductase                                                                 | <b>EC 2.8.4.1</b>   | <b>COG4058</b>                               | <b>arCOG04857</b> | P07962 |
| Heterodisulfide reductase                                                            | <b>EC 1.8.98.1</b>  | <b>COG0247</b>                               | <b>arCOG00333</b> | Q8PVW3 |

## References

1. Bonk, F.; Popp, D.; Weinrich, S.; Sträuber, H.; Kleinsteuber, S.; Harms, H.; Centler, F. Intermittent Fasting for Microbes: How Discontinuous Feeding Increases Functional Stability in Anaerobic Digestion. *Biotechnol Biofuels* 2018, *11*, 274, doi:10.1186/s13068-018-1279-5.
2. Sikora, A.; Detman, A.; Mielecki, D.; Chojnacka, A.; Błaszczuk, M. Searching for Metabolic Pathways of Anaerobic Digestion: A Useful List of the Key Enzymes. In *Anaerobic Digestion*; Banu, J.R., Ed.; 2018 ISBN 9781838818494.
