# Supplementary material for: Metagenomic Analysis of Anaerobic Microbial Communities Degrading Short-Chain Fatty Acids as Sole Carbon Sources
Source: Microorganisms. 2023 Feb 7;11(2):420. doi: 10.3390/microorganisms11020420 (PMC9959488; doi:10.3390/microorganisms11020420)
Supplement: Supplementary file 1 [file microorganisms-11-00420-s001.zip › Supplementary File 2.xlsx]

## Sheet: overview
Map	Description
B.1 - Statistics - Community'!A1	All statistical data of trimming, mapping, assembly and binning using the workflow of Becker et al., 2020.
B.2.1 - Community composition'!A1	Whole community composition using the selection approach (expected/unexpected) of Becker et al., 2020.
B.2.2 - Functional potential'!A1	The functional potential of the whole community is illustrated per level based on eggnog (using the Becker et al., 2020 CMP workflow)
B.3 - read counts'!A1	Read counts which were used to calculate the read counts per contig to merge expected annotation results with unexpected annotation results, in order to build the whole community overview.
B.4 - Functional catalog'!A1	A Matrix of all genes and genera. This data are based on the trimmed interleaved paired end and trimmed unpaired files (regardless of the selection of unexpected/expected species).
B.5 - Pathways '!A1	Selected genes, based on the functional cataloge, per pathway.
B.6.1 - MAGs Illumina'!A1	To generate MAGs with higher quality, metaSPAdes and MaxBin2 are used to generate MAGs of Illumina based sequencing.
B.6.2 - MAGs hybrid'!A1	To generate larger MAGs a hybrid approach using Illumina based and Nanopore based reads.
B.6.3 - compared-MAGs'!A1	Comparing Illumina MAGs with MAGs based on hybrid approach (Illumina & Nanopore).
B.7 - DSMZ hybrid MAGs'!A1	DSMZ online analyse of hybrid MAGs.

## Sheet: B.1 - Statistics - Community
Analysis followed Becker et al. 2019 (MG-Workflow using selection of expected and unexpected species information)
Features of the original row read files per sample						Features of trimmed and quality filtered cleaned read files per sample in total*								overall mapping rate by using Bowtie2 as pre-mapping tool*					Assembly stats of unexpected reads only								RE-Assembly stats of unexpected reads only (followed after binning)								Binning stats (only for unexpected reads)
Sample Name	% Dups	% GC	Average length	Quantity (M)		Sample Name	% Dups	% GC	Average length	Quantity (M)	Interleaved paired end reads (M)	Quantity loss		Sample Name	number of paired reads	overall alignment rate			Sample Name	N50 (Kbp)	N75 (Kbp)	L50 (K)	L75 (K)	Largest contig (Kbp)	Total assembly length (Mbp)		Sample Name	N50 (Kbp)	N75 (Kbp)	L50 (K)	L75 (K)	Largest contig (Kbp)	Total assembly length (Mbp)		Bin ID	Marker lineage		# genomes	# markers	# marker sets	0	1	2	3	4	5+	Completeness*	Contamination**	Strain heterogeneity
R-1_F	0.487	0.51	190 bp	18.9		R-1	0.456	0.51	172 bp	35.6	34	0.0582		R-1	17015947	0.6724			R-1_assembly	6.2Kbp	2.7Kbp	1.3K	3744.0K	347.2Kbp	39.1Mbp		R-1_reassembly	6.7Kbp	2.9Kbp	1.1K	3266.0K	347.2Kbp	36.6Mbp		Bin_R-1.005	k__Bacteria	(UID2495)	2993	147	91	0	147	0	0	0	0	100	0	0
R-1_R	0.455	0.51	190 bp	18.9		R-2	0.257	0.51	203 bp	6.8	6.6	0.0286		R-2	3324198	0.5734			R-2_assembly	4.6Kbp	2.3Kbp	0.8K	2359.0K	114.6Kbp	18.9Mbp		R-2_reassembly	4.6Kbp	2.3Kbp	0.8K	2240.0K	114.8Kbp	18.4Mbp		Bin_R-1.013	k__Bacteria	(UID203)	5449	104	58	9	41	43	10	1	0	98.4	78.46	3.8
R-2_F	0.253	0.51	229 bp	3.5		R-3	0.221	0.51	199 bp	6.7	6.6	0.0147		R-3	3276271	0.5721			R-3_assembly	6.6Kbp	2.7Kbp	0.7K	1969.0K	106.2Kbp	20.9Mbp		R-3_reassembly	6.9Kbp	2.9Kbp	0.6K	1734.0K	106.2Kbp	19.4Mbp		Bin_R-1.006	c__Clostridia	(UID1085)	35	420	196	8	403	9	0	0	0	96.83	2.42	0
R-2_R	0.241	0.51	230 bp	3.5		R-4	0.194	0.53	204 bp	7.2	7	0.027		R-4	3512687	0.4813			R-4_assembly	7.1Kbp	3.1Kbp	0.7K	2094.0K	142.9Kbp	24.8Mbp		R-4_reassembly	7.5Kbp	3.3Kbp	0.7K	1891.0K	130.9Kbp	23.6Mbp		Bin_R-1.007	k__Bacteria	(UID2495)	2993	143	89	5	136	2	0	0	0	95.88	1.5	50
R-3_F	0.215	0.52	225 bp	3.4		R-5	0.155	0.51	215 bp	8.1	7.9	0.0357		R-5	3971047	0.4555			R-5_assembly	5.9Kbp	2.7Kbp	1.3K	3740.0K	174.6Kbp	37.5Mbp		R-5_reassembly	6.2Kbp	2.8Kbp	1.1K	3375.0K	204.6Kbp	35.6Mbp		Bin_R-1.003	k__Bacteria	(UID2569)	434	278	186	9	267	2	0	0	0	95.43	1.08	0
R-3_R	0.207	0.52	226 bp	3.4																															Bin_R-1.008	k__Bacteria	(UID2495)	2993	141	87	9	130	2	0	0	0	92.79	1.34	0
R-4_F	0.167	0.53	232 bp	3.7																															Bin_R-1.012	k__Bacteria	(UID203)	5449	104	58	12	65	22	5	0	0	92.01	31.69	2.7
R-4_R	0.158	0.53	233 bp	3.7																															Bin_R-1.011	k__Bacteria	(UID209)	5443	104	58	19	80	5	0	0	0	88.61	4.62	20
R-5_F	0.138	0.51	246 bp	4.2		* total means: interleaved paired end reads + unpaired reads								* pre-mapping: selected expected and unexpected reads. Overall alignment rate give the percent of expected reads.					Sample Name	≥50000 bp	25000-50000 bp	10000-25000 bp	5000-10000 bp	1000-5000 bp			Sample Name	≥50000 bp	25000-50000 bp	10000-25000 bp	5000-10000 bp	1000-5000 bp			Bin_R-1.010	k__Bacteria	(UID203)	5449	104	58	15	49	39	1	0	0	77.72	42.99	2.38
R-5_R	0.132	0.51	246 bp	4.2															R-1_assembly	48	89	463	1096	7500			R-1_reassembly	47	85	447	1039	6578			Bin_R-1.009	k__Bacteria	(UID203)	5449	104	58	36	42	21	5	0	0	62.74	21.47	0
																			R-2_assembly	17	55	192	458	4416			R-2_reassembly	19	50	184	444	4214			Bin_R-1.015	k__Bacteria	(UID203)	5449	103	57	62	35	6	0	0	0	48.5	7.02	0
																			R-3_assembly	20	66	309	531	3941			R-3_reassembly	20	63	291	503	3460			Bin_R-1.014	k__Bacteria	(UID2495)	2993	143	89	87	53	3	0	0	0	31.5	2.35	0
																			R-4_assembly	21	89	362	733	4033			R-4_reassembly	20	97	349	683	3649			Bin_R-1.004	k__Archaea	(UID2)	207	148	106	122	26	0	0	0	0	21.23	0	0
																			R-5_assembly	45	115	417	1024	7357			R-5_reassembly	47	109	403	978	6690			Bin_R-1.002	root	(UID1)	5656	56	24	56	0	0	0	0	0	0	0	0
MinIon Data		R-1	R-4																																Bin_R-1.001	root	(UID1)	5656	56	24	56	0	0	0	0	0	0	0	0
total output (fastq, Q7)		1.7 Gb	3.0 Gb
number of reads (fastq, Q7)		548097	332639																																Bin_R-2.004	c__Clostridia	(UID1085)	35	420	196	1	405	12	2	0	0	99.49	4.13	0
mean quality (fastq, Q7)		9.3	9.2																																Bin_R-2.002	k__Bacteria	(UID2495)	2993	143	89	2	134	7	0	0	0	97.75	3.81	14.29
mean read length (fastq, Q7)		3132.8	9120.8																																Bin_R-2.006	k__Bacteria	(UID203)	5449	104	58	11	54	33	6	0	0	85.19	42.12	1.96
read length N50 (fastq, Q7)		5828	14380																																Bin_R-2.005	k__Bacteria	(UID203)	5449	104	58	22	80	2	0	0	0	69.1	1.88	0
longest read		82450	99673																																Bin_R-2.007	k__Bacteria	(UID3187)	2258	190	119	70	102	18	0	0	0	64.51	7.16	0
																																			Bin_R-2.008	k__Bacteria	(UID2495)	2993	147	91	78	61	8	0	0	0	40.75	3.14	0
																																			Bin_R-2.003	root	(UID1)	5656	56	24	56	0	0	0	0	0	0	0	0
																																			Bin_R-2.001	root	(UID1)	5656	56	24	56	0	0	0	0	0	0	0	0
																																			Bin_R-3.005	c__Clostridia	(UID1085)	35	420	196	15	298	85	19	3	0	96.72	31.67	1.88
																																			Bin_R-3.003	k__Bacteria	(UID2569)	434	278	186	24	245	9	0	0	0	90.04	3.54	11.11
																																			Bin_R-3.004	p__Bacteroidetes	(UID2605)	350	316	210	24	273	18	1	0	0	89.52	7.17	4.76
																																			Bin_R-3.006	k__Bacteria	(UID203)	5449	100	55	14	46	39	1	0	0	76.2	31.08	0
																																			Bin_R-3.007	k__Bacteria	(UID209)	5443	105	59	24	80	1	0	0	0	72.65	1.69	0
																																			Bin_R-3.008	c__Deltaproteobacteria	(UID3217)	62	280	168	107	150	23	0	0	0	64.83	6.77	0
																																			Bin_R-3.002	root	(UID1)	5656	56	24	54	2	0	0	0	0	8.33	0	0
																																			Bin_R-3.001	root	(UID1)	5656	56	24	56	0	0	0	0	0	0	0	0
																																			Bin_R-4.002	k__Bacteria	(UID209)	5443	104	58	3	96	5	0	0	0	99.53	2.19	40
																																			Bin_R-4.003	c__Clostridia	(UID1085)	35	420	196	5	397	17	1	0	0	98.58	5.43	10
																																			Bin_R-4.005	k__Bacteria	(UID2495)	2993	141	87	11	128	2	0	0	0	93.63	0.96	100
																																			Bin_R-4.004	k__Bacteria	(UID209)	5443	105	59	7	94	4	0	0	0	93.61	3.7	25
																																			Bin_R-4.007	c__Deltaproteobacteria	(UID3216)	83	247	155	55	182	10	0	0	0	78.91	5.02	10
																																			Bin_R-4.008	o__Clostridiales	(UID1120)	304	250	143	55	174	21	0	0	0	72.34	8.53	4.76
																																			Bin_R-4.006	k__Bacteria	(UID2569)	434	278	186	103	145	24	6	0	0	59.82	11.12	0
																																			Bin_R-4.001	root	(UID1)	5656	56	24	56	0	0	0	0	0	0	0	0
																																			Bin_R-5.002	k__Bacteria	(UID2495)	2993	147	91	0	145	2	0	0	0	100	2.2	0
																																			Bin_R-5.006	k__Bacteria	(UID209)	5443	105	59	4	100	1	0	0	0	97.84	1.69	0
																																			Bin_R-5.004	k__Bacteria	(UID2495)	2993	141	87	3	137	1	0	0	0	96.55	0.1	0
																																			Bin_R-5.005	k__Bacteria	(UID2495)	2993	143	89	4	131	8	0	0	0	95.51	3.52	0
																																			Bin_R-5.003	c__Clostridia	(UID1085)	35	420	196	27	391	2	0	0	0	94.03	0.36	50
																																			Bin_R-5.007	k__Bacteria	(UID2569)	434	278	186	23	252	3	0	0	0	91.41	1.34	33.33
																																			Bin_R-5.010	c__Deltaproteobacteria	(UID3216)	83	247	155	43	181	22	1	0	0	85.84	12.25	0
																																			Bin_R-5.013	o__Clostridiales	(UID1120)	304	247	141	35	150	59	2	1	0	83.68	25.16	2.82
																																			Bin_R-5.009	o__Actinomycetales	(UID1590)	562	282	168	46	230	6	0	0	0	83.53	2.68	16.67
																																			Bin_R-5.012	k__Bacteria	(UID2569)	434	278	186	61	169	44	4	0	0	71.45	15.76	0
																																			Bin_R-5.011	p__Bacteroidetes	(UID2605)	350	316	210	102	180	33	0	1	0	69.52	11.06	0
																																			Bin_R-5.014	c__Clostridia	(UID1085)	35	420	196	161	235	24	0	0	0	66.01	4.49	4.17
																																			Bin_R-5.008	c__Clostridia	(UID1085)	35	420	196	333	69	14	4	0	0	16.52	1.97	0
																																			Bin_R-5.001	k__Archaea	(UID2)	207	148	106	134	14	0	0	0	0	10.85	0	0
																																			* highlighted are completness >95%
																																			** highlighted are contamination <5%

## Sheet: B.2.1 - Community composition
Note: Expected reads were annotated and counted directly. Unexpected reads were analysed using assembly and binning additional. Thus, final generated contigs were annotated and re-calculated into read counts (see B.3.). Finally both kinds of read counts were summarised to calculate the whole potential community.
	R-1							R-2							R-3							R-4							R-5
switch to summerized picture	expected read counts		unexpected read counts			total composition		expected read counts		unexpected read counts			total composition		expected read counts		unexpected read counts			total composition		expected read counts		unexpected read counts			total composition		expected read counts		unexpected read counts			total composition
all leaves/domain	expected read counts	relative abundance	unexpected contig counts	unexpected read counts	relative abundance	total read counts	total relative abundance	expected read counts	relative abundance	unexpected contig counts	unexpected read counts	relative abundance	total read counts	total relative abundance	expected read counts	relative abundance	unexpected contig counts	unexpected read counts	relative abundance	total read counts	total relative abundance	expected read counts	relative abundance	unexpected contig counts	unexpected read counts	relative abundance	total read counts	total relative abundance	expected read counts	relative abundance	unexpected contig counts	unexpected read counts	relative abundance	total read counts	total relative abundance
Bacteria	1873071	10.4313	6319	4668916	60.6582	6541987	25.5016	59349	1.88186	4198	1627636	41.496	1686985	23.8405	97030	3.19297	3633	1293303	67.8657	1390333	28.1185	408924	14.5715	4011	1349024	49.9143	1757948	31.9105	145735	4.75574	6336	2102744	61.1826	2248479	34.5854
Archaea	16081816	89.5614	1414	2840741	36.9067	18922557	73.7628	3094190	98.1118	588	2269169	57.8516	5363359	75.795	2939782	96.7396	586	593903	31.1649	3533685	71.4664	2396548	85.3982	609	1152975	42.6604	3549523	64.4313	2918456	95.2374	1472	1315375	38.2728	4233831	65.1235
Eukaryota	0	0	14	91509	1.18888	91509	0.356715	0	0	5	22236	0.566898	22236	0.314239	1866	0.0614046	3	15311	0.80344	17177	0.347393	0	0	6	7388	0.273358	7388	0.134108	0	0	5	5248	0.152699	5248	0.0807231
Viruses	0	0	0	0	0	0	0	0	0	3	2635	0.0671783	2635	0.0372378	0	0	4	2211	0.116022	2211	0.044716	0	0	0	0	0	0	0	0	0	6	940	0.0273507	940	0.0144588
Not assigned	1294	0.00720643	301	95918	1.24616	97212	0.378946	200	0.00634168	10	720	0.0183561	920	0.0130014	184	0.0060549	12	953	0.0500084	1137	0.022995	848	0.0302175	91	193295	7.15197	194143	3.5241	209	0.00682026	233	12529	0.36455	12738	0.195932
sum	17956181	100	8048	7697084	100	25653265	100	3153739	100	4804	3922396	100	7076135	100	3038862	100	4238	1905681	100	4944543	100	2806320	100	4717	2702682	100	5509002	100	3064400	100	8052	3436836	100	6501236	100
all leaves/phylum	expected read counts	relative abundance	unexpected contig counts	unexpected read counts	relative abundance	total read counts	total relative abundance	expected read counts	relative abundance	unexpected contig counts	unexpected read counts	relative abundance	total read counts	total relative abundance	expected read counts	relative abundance	unexpected contig counts	unexpected read counts	relative abundance	total read counts	total relative abundance	expected read counts	relative abundance	unexpected contig counts	unexpected read counts	relative abundance	total read counts	total relative abundance	expected read counts	relative abundance	unexpected contig counts	unexpected read counts	relative abundance	total read counts	total relative abundance
Acidobacteria	0	0	4	9105	0.132073	9105	0.0369544	0	0	2	1404	0.0381959	1404	0.0206666	0	0	2	1510	0.0868768	1510	0.0318961	0	0	2	645	0.0256125	645	0.0122342	0	0	0	0	0	0	0
Caldiserica	0	0	0	0	0	0	0	0	0	0	0	0	0	0	0	0	0	0	0	0	0	0	0	0	0	0	0	0	0	0	0	0	0	0	0
Elusimicrobia	0	0	152	150527	2.18347	150527	0.610944	0	0	156	263956	7.18094	263956	3.88539	0	0	249	18323	1.0542	18323	0.387041	0	0	0	0	0	0	0	0	0	188	114441	3.65592	114441	1.86281
environmental samples <Bacteria>	0	0	0	0	0	0	0	0	0	3	183	0.00497853	183	0.00269373	0	0	0	0	0	0	0	0	0	3	913	0.0362546	913	0.0173175	0	0	0	0	0	0	0
Bacteroidetes	0	0	490	1630893	23.6569	1630893	6.6193	0	0	1262	200251	5.44784	200251	2.94766	0	0	669	462816	26.6278	462816	9.77617	0	0	662	109625	4.35314	109625	2.07934	0	0	1700	341363	10.9052	341363	5.55652
Chlorobi	0	0	0	0	0	0	0	0	0	2	85	0.00231243	85	0.00125119	0	0	3	212	0.0121973	212	0.00447813	0	0	0	0	0	0	0	0	0	0	0	0	0	0
Ignavibacteriae	0	0	0	0	0	0	0	0	0	0	0	0	0	0	0	0	3	304	0.0174904	304	0.00642147	0	0	2	213	0.00845809	213	0.00404013	0	0	0	0	0	0	0
Candidatus Cloacimonetes	16392	0.0923779	284	383743	5.56638	400135	1.62403	0	0	441	33052	0.899182	33052	0.48652	0	0	332	27523	1.58352	27523	0.581375	158717	5.76354	234	28502	1.1318	187219	3.55112	13344	0.442854	81	251523	8.03514	264867	4.31136
Candidatus Tectomicrobia	0	0	0	0	0	0	0	0	0	0	0	0	0	0	0	0	0	0	0	0	0	0	0	0	0	0	0	0	0	0	0	0	0	0	0
Nitrospirae	0	0	21	6229	0.0903548	6229	0.0252816	0	0	7	1416	0.0385224	1416	0.0208433	0	0	6	1166	0.067085	1166	0.0246297	0	0	4	1055	0.0418933	1055	0.020011	0	0	0	0	0	0	0
Proteobacteria	100679	0.567381	890	330493	4.79397	431172	1.75	13685	0.438936	912	283988	7.72591	297673	4.3817	45315	1.5125	916	126752	7.29259	172067	3.63461	31909	1.15872	834	161053	6.39531	192962	3.66005	46792	1.55291	854	189751	6.06177	236543	3.85031
Candidatus Omnitrophica	0	0	20	3047	0.0441983	3047	0.0123669	0	0	0	0	0	0	0	0	0	0	0	0	0	0	0	0	0	0	0	0	0	0	0	0	0	0	0	0
Chlamydiae	0	0	0	0	0	0	0	0	0	0	0	0	0	0	2572	0.085847	0	0	0	2572	0.054329	0	0	0	0	0	0	0	0	0	0	0	0	0	0
Lentisphaerae	0	0	0	0	0	0	0	0	0	4	9333	0.253905	9333	0.13738	0	0	2	133	0.00765206	133	0.00280939	0	0	0	0	0	0	0	0	0	0	0	0	0	0
Planctomycetes	0	0	0	0	0	0	0	0	0	3	429	0.011671	429	0.00631481	0	0	2	367	0.0211151	367	0.00775223	0	0	4	801	0.0318072	801	0.0151932	0	0	0	0	0	0	0
Verrucomicrobia	0	0	4	843	0.0122281	843	0.00342148	0	0	2	103	0.00280212	103	0.00151614	0	0	5	427	0.0245672	427	0.00901962	0	0	0	0	0	0	0	0	0	0	0	0	0	0
Spirochaetes	0	0	250	196818	2.85494	196818	0.798825	0	0	57	3897	0.106018	3897	0.0573632	0	0	41	2658	0.152926	2658	0.0561456	0	0	254	110213	4.37648	110213	2.09049	0	0	133	207503	6.62888	207503	3.37762
Synergistetes	19718	0.111122	223	15319	0.22221	35037	0.142205	11787	0.378059	130	5261	0.143126	17048	0.250944	11961	0.399228	390	63730	3.66666	75691	1.59884	1585	0.0575566	153	110567	4.39054	112152	2.12727	10708	0.355372	158	146163	4.66931	156871	2.55346
Actinobacteria <phylum>	0	0	13	60504	0.877641	60504	0.245567	0	0	8	15205	0.413653	15205	0.223815	0	0	7	13701	0.788278	13701	0.28941	1585	0.0575566	8	31714	1.25934	33299	0.631606	4547	0.150903	667	146058	4.66596	150605	2.45146
Armatimonadetes	0	0	0	0	0	0	0	0	0	0	0	0	0	0	0	0	0	0	0	0	0	0	0	4	95	0.00377239	95	0.00180193	0	0	0	0	0	0	0
Chloroflexi	0	0	221	16912	0.245317	16912	0.0686407	0	0	170	13301	0.361855	13301	0.195789	0	0	89	5762	0.331513	5762	0.121712	0	0	11	2891	0.1148	2891	0.0548357	0	0	47	2925	0.0934419	2925	0.0476115
Candidatus Margulisbacteria	0	0	0	0	0	0	0	0	0	2	1393	0.0378967	1393	0.0205047	0	0	2	1248	0.0718028	1248	0.0263618	0	0	0	0	0	0	0	0	0	0	0	0	0	0
Candidatus Melainabacteria	0	0	12	6260	0.0908044	6260	0.0254074	0	0	6	997	0.0271235	997	0.0146757	0	0	4	114	0.00655891	114	0.00240805	0	0	8	3082	0.122384	3082	0.0584585	0	0	0	0	0	0	0
Cyanobacteria	0	0	11	12477	0.180985	12477	0.0506404	0	0	9	1814	0.04935	1814	0.0267018	0	0	5	3025	0.174041	3025	0.0638978	0	0	10	5929	0.235437	5929	0.11246	0	0	5	4533	0.144811	4533	0.0737856
Firmicutes	1603114	9.03442	2181	900430	13.0612	2503544	10.1611	12498	0.400864	422	488753	13.2966	501251	7.37833	10665	0.355971	342	371570	21.378	382235	8.07404	175508	6.37327	1244	493970	19.6152	669478	12.6985	37934	1.25893	1450	377797	12.0691	415731	6.76704
Tenericutes	0	0	259	30447	0.441649	30447	0.123575	0	0	0	0	0	0	0	0	0	2	92	0.00529316	92	0.00194334	0	0	0	0	0	0	0	0	0	22	710	0.0226816	710	0.011557
Thermotogae <phylum>	0	0	233	97208	1.41005	97208	0.394538	0	0	7	3395	0.0923612	3395	0.0499738	0	0	7	4945	0.284507	4945	0.104454	12234	0.444257	62	123687	4.91153	135921	2.57811	2812	0.0933232	157	24873	0.794591	27685	0.450641
candidate division KSB1	0	0	0	0	0	0	0	0	0	0	0	0	0	0	0	0	0	0	0	0	0	0	0	0	0	0	0	0	0	0	0	0	0	0	0
candidate division SR1	0	0	0	0	0	0	0	0	0	0	0	0	0	0	0	0	0	0	0	0	0	0	0	7	1205	0.0478497	1205	0.0228561	0	0	10	612	0.0195509	612	0.00996179
Candidatus Atribacteria	0	0	0	0	0	0	0	0	0	2	1223	0.0332718	1223	0.0180024	0	0	0	0	0	0	0	0	0	0	0	0	0	0	0	0	0	0	0	0	0
Candidatus Riflebacteria	0	0	0	0	0	0	0	0	0	0	0	0	0	0	0	0	0	0	0	0	0	0	0	0	0	0	0	0	0	0	117	4708	0.150401	4708	0.0766342
Candidatus Saccharibacteria	0	0	0	0	0	0	0	0	0	0	0	0	0	0	0	0	0	0	0	0	0	0	0	0	0	0	0	0	0	0	0	0	0	0	0
Candidatus Amesbacteria	0	0	0	0	0	0	0	0	0	0	0	0	0	0	0	0	0	0	0	0	0	0	0	0	0	0	0	0	0	0	0	0	0	0	0
Candidatus Levybacteria	0	0	0	0	0	0	0	0	0	2	184	0.00500573	184	0.00270845	0	0	2	291	0.0167425	291	0.00614686	0	0	0	0	0	0	0	0	0	0	0	0	0	0
Candidatus Falkowbacteria	0	0	0	0	0	0	0	0	0	0	0	0	0	0	0	0	0	0	0	0	0	0	0	0	0	0	0	0	0	0	0	0	0	0	0
Candidatus Nealsonbacteria	0	0	10	3047	0.0441983	3047	0.0123669	0	0	0	0	0	0	0	0	0	3	559	0.0321617	559	0.0118079	0	0	0	0	0	0	0	0	0	0	0	0	0	0
Candidatus Parcubacteria	0	0	84	117308	1.70161	117308	0.476118	0	0	62	52097	1.4173	52097	0.766859	0	0	77	38373	2.20776	38373	0.810562	0	0	5	393	0.0156058	393	0.00745432	0	0	9	564	0.0180175	564	0.00918047
Candidatus Wolfebacteria	0	0	0	0	0	0	0	0	0	2	148	0.00402635	148	0.00217854	0	0	2	107	0.00615617	107	0.00226019	0	0	0	0	0	0	0	0	0	6	310	0.00990324	310	0.00504601
unclassified Bacteria (miscellaneous)	0	0	10	2311	0.0335222	2311	0.00937965	0	0	3	179	0.00486971	179	0.00263485	0	0	0	0	0	0	0	0	0	5	489	0.0194179	489	0.00927522	0	0	0	0	0	0	0
environmental samples <Archaea>	0	0	0	0	0	0	0	0	0	4	2664	0.0724743	2664	0.0392136	0	0	0	0	0	0	0	0	0	2	188	0.00746535	188	0.00356593	0	0	0	0	0	0	0
Euryarchaeota	16003312	90.1874	1406	2824097	40.9649	18827409	76.4148	3079599	98.7757	579	2265848	61.6425	5345447	78.6841	2923678	97.5851	578	589221	33.9004	3512899	74.2038	2371426	86.1143	597	1137547	45.1712	3508973	66.5573	2896838	96.1388	1457	1302986	41.6251	4199824	68.3624
Ascomycota	0	0	0	0	0	0	0	0	0	0	0	0	0	0	1654	0.0552064	0	0	0	1654	0.0349378	0	0	0	0	0	0	0	0	0	0	0	0	0	0
Arthropoda	0	0	0	0	0	0	0	0	0	0	0	0	0	0	0	0	0	0	0	0	0	0	0	2	228	0.00905373	228	0.00432464	0	0	0	0	0	0	0
Streptophyta	0	0	0	0	0	0	0	0	0	2	21872	0.595029	21872	0.321952	0	0	0	0	0	0	0	0	0	0	0	0	0	0	0	0	0	0	0	0	0
Viruses	0	0	0	0	0	0	0	0	0	3	2635	0.0716853	2635	0.0387868	0	0	4	2211	0.127208	2211	0.0467035	0	0	0	0	0	0	0	0	0	6	940	0.0300292	940	0.0153008
Not assigned	1294	0.0072924	301	95918	1.39134	97212	0.394554	200	0.00641484	10	720	0.0195876	920	0.0135422	184	0.00614146	12	953	0.0548302	1137	0.0240171	848	0.0307937	91	193295	7.67561	194143	3.68245	209	0.00693618	233	12529	0.400251	12738	0.207342
sum	17744509	100	7079	6893936	100	24638445	100	3117769	100	4274	3675786	100	6793555	100	2996029	100	3756	1738093	100	4734122	100	2753812	100	4208	2518300	100	5272112	100	3013184	100	7300	3130289	100	6143473	100
all leaves/class	expected read counts	relative abundance	unexpected contig counts	unexpected read counts	relative abundance	total read counts	total relative abundance	expected read counts	relative abundance	unexpected contig counts	unexpected read counts	relative abundance	total read counts	total relative abundance	expected read counts	relative abundance	unexpected contig counts	unexpected read counts	relative abundance	total read counts	total relative abundance	expected read counts	relative abundance	unexpected contig counts	unexpected read counts	relative abundance	total read counts	total relative abundance	expected read counts	relative abundance	unexpected contig counts	unexpected read counts	relative abundance	total read counts	total relative abundance
Acidobacteria	0	0	4	9105	0.166156	9105	0.0395646	0	0	2	1404	0.0417736	1404	0.0217537	0	0	2	1510	0.114852	1510	0.0352555	0	0	2	645	0.0284496	645	0.0129298	0	0	0	0	0	0	0
Caldisericia	0	0	0	0	0	0	0	0	0	0	0	0	0	0	0	0	0	0	0	0	0	0	0	0	0	0	0	0	0	0	0	0	0	0	0
Elusimicrobia <class>	0	0	0	0	0	0	0	0	0	2	7641	0.227345	7641	0.11839	0	0	0	0	0	0	0	0	0	0	0	0	0	0	0	0	0	0	0	0	0
Endomicrobia	0	0	94	74075	1.35178	74075	0.321884	0	0	93	132130	3.9313	132130	2.04723	0	0	159	11325	0.86139	11325	0.264416	0	0	0	0	0	0	0	0	0	116	63754	2.3662	63754	1.12275
unclassified Elusimicrobia	0	0	11	15668	0.285923	15668	0.0680833	0	0	14	41501	1.23479	41501	0.643019	0	0	19	2076	0.157902	2076	0.0484704	0	0	0	0	0	0	0	0	0	16	7415	0.275205	7415	0.130583
environmental samples <Bacteria>	0	0	0	0	0	0	0	0	0	3	183	0.00544485	183	0.00283541	0	0	0	0	0	0	0	0	0	3	913	0.0402705	913	0.0183021	0	0	0	0	0	0	0
Bacteroidia	0	0	83	190468	3.47582	190468	0.827655	0	0	166	25567	0.760702	25567	0.396137	0	0	70	59349	4.51414	59349	1.38568	0	0	56	8051	0.355113	8051	0.161391	0	0	365	49826	1.84927	49826	0.877467
Chitinophagia	0	0	0	0	0	0	0	0	0	0	0	0	0	0	0	0	0	0	0	0	0	0	0	0	0	0	0	0	0	0	0	0	0	0	0
Cytophagia	0	0	6	372	0.00678857	372	0.00161648	0	0	10	2091	0.0622141	2091	0.0323981	0	0	4	544	0.0413771	544	0.0127013	0	0	3	467	0.0205984	467	0.00936155	0	0	11	3022	0.11216	3022	0.0532193
Flavobacteriia	0	0	10	43756	0.798497	43756	0.190136	0	0	19	3478	0.103482	3478	0.0538884	0	0	16	11531	0.877058	11531	0.269226	0	0	12	7032	0.310167	7032	0.140964	0	0	27	6849	0.254198	6849	0.120615
Saprospiria	0	0	0	0	0	0	0	0	0	0	0	0	0	0	0	0	2	180	0.013691	180	0.00420264	0	0	0	0	0	0	0	0	0	0	0	0	0	0
Sphingobacteriia	0	0	0	0	0	0	0	0	0	2	593	0.0176437	593	0.00918798	0	0	0	0	0	0	0	0	0	0	0	0	0	0	0	0	0	0	0	0	0
unclassified Bacteroidetes	0	0	149	428728	7.82379	428728	1.86298	0	0	440	69362	2.06375	69362	1.0747	0	0	217	156725	11.9206	156725	3.65921	0	0	275	45997	2.02883	45997	0.922062	0	0	449	111960	4.15535	111960	1.97168
Chlorobia	0	0	0	0	0	0	0	0	0	2	85	0.00252903	85	0.001317	0	0	2	106	0.00806246	106	0.00247489	0	0	0	0	0	0	0	0	0	0	0	0	0	0
Ignavibacteria	0	0	0	0	0	0	0	0	0	0	0	0	0	0	0	0	3	304	0.0231225	304	0.00709779	0	0	2	213	0.00939498	213	0.00426983	0	0	0	0	0	0	0
Candidatus Cloacimonetes	16392	0.0934913	284	383743	7.00287	400135	1.73874	0	0	441	33052	0.983405	33052	0.51211	0	0	332	27523	2.09342	27523	0.642607	158717	5.83235	234	28502	1.25716	187219	3.75302	13344	0.44718	81	251523	9.33517	264867	4.66447
Candidatus Tectomicrobia	0	0	0	0	0	0	0	0	0	0	0	0	0	0	0	0	0	0	0	0	0	0	0	0	0	0	0	0	0	0	0	0	0	0	0
Nitrospira <class>	0	0	4	1348	0.0245995	1348	0.00585756	0	0	2	220	0.00654572	220	0.00340869	0	0	3	262	0.019928	262	0.00611717	0	0	2	809	0.0356833	809	0.0162173	0	0	0	0	0	0	0
unclassified Nitrospirae	0	0	6	4384	0.080003	4384	0.0190501	0	0	3	1057	0.0314492	1057	0.0163772	0	0	2	748	0.0568936	748	0.0174643	0	0	0	0	0	0	0	0	0	0	0	0	0	0
Alphaproteobacteria	0	0	8	1358	0.0247819	1358	0.00590102	0	0	3	164	0.00487953	164	0.00254103	0	0	3	157	0.0119416	157	0.00366563	0	0	6	1488	0.0656325	1488	0.0298287	0	0	10	3728	0.138363	3728	0.0656524
Betaproteobacteria	41610	0.237321	63	6828	0.124603	48438	0.210481	1812	0.0585818	5	4361	0.129754	6173	0.0956449	25147	0.847188	43	2717	0.206657	27864	0.650568	0	0	4	4814	0.212335	4814	0.0965021	25831	0.86564	59	3670	0.136211	29501	0.519531
Deltaproteobacteria	24656	0.140625	707	282000	5.14618	306656	1.33253	5166	0.167016	834	216869	6.45256	222035	3.44022	5783	0.194826	779	114345	8.69718	120128	2.80475	22905	0.841686	761	141735	6.25163	164640	3.3004	11532	0.386457	677	158059	5.8663	169591	2.9866
Epsilonproteobacteria	10620	0.0605708	4	6295	0.114877	16915	0.073502	1627	0.0526008	3	860	0.0255878	2487	0.0385337	3439	0.115858	7	635	0.0482987	4074	0.0951197	0	0	0	0	0	0	0	0	0	4	5087	0.188802	5087	0.0895852
Gammaproteobacteria	0	0	38	5481	0.100022	5481	0.023817	1756	0.0567714	20	48688	1.44863	50444	0.781583	3195	0.107638	20	2544	0.193499	5739	0.133994	6186	0.227316	11	2486	0.109652	8672	0.17384	3000	0.100535	40	9007	0.334291	12007	0.211451
Candidatus Omnitrophica	0	0	20	3047	0.0556043	3047	0.0132404	0	0	0	0	0	0	0	0	0	0	0	0	0	0	0	0	0	0	0	0	0	0	0	0	0	0	0	0
Chlamydiia	0	0	0	0	0	0	0	0	0	0	0	0	0	0	2572	0.0866492	0	0	0	2572	0.060051	0	0	0	0	0	0	0	0	0	0	0	0	0	0
unclassified Lentisphaerae	0	0	0	0	0	0	0	0	0	4	9333	0.277687	9333	0.144606	0	0	2	133	0.0101161	133	0.00310528	0	0	0	0	0	0	0	0	0	0	0	0	0	0
Planctomycetia	0	0	0	0	0	0	0	0	0	0	0	0	0	0	0	0	0	0	0	0	0	0	0	2	238	0.0104977	238	0.00477098	0	0	0	0	0	0	0
unclassified Planctomycetes	0	0	0	0	0	0	0	0	0	0	0	0	0	0	0	0	0	0	0	0	0	0	0	0	0	0	0	0	0	0	0	0	0	0	0
unclassified Verrucomicrobia	0	0	0	0	0	0	0	0	0	2	103	0.00306459	103	0.00159589	0	0	3	245	0.0186349	245	0.00572026	0	0	0	0	0	0	0	0	0	0	0	0	0	0
Spirochaetia	0	0	20	12646	0.230775	12646	0.0549516	0	0	10	2363	0.070307	2363	0.0366125	0	0	9	1523	0.115841	1523	0.035559	0	0	29	10089	0.445005	10089	0.202246	0	0	36	11000	0.408261	11000	0.193717
unclassified Spirochaetes	0	0	161	118265	2.1582	118265	0.513906	0	0	36	1186	0.0352874	1186	0.018376	0	0	24	888	0.0675421	888	0.020733	0	0	169	77179	3.4042	77179	1.54714	0	0	67	119902	4.45011	119902	2.11155
Synergistia	19115	0.109022	222	15270	0.27866	34385	0.149416	11398	0.368497	126	5074	0.150968	16472	0.255218	11609	0.391101	389	63527	4.83192	75136	1.75427	0	0	151	109769	4.84168	109769	2.20044	10252	0.343562	141	143663	5.33199	153915	2.71054
unclassified Synergistetes	0	0	0	0	0	0	0	0	0	0	0	0	0	0	0	0	0	0	0	0	0	0	0	0	0	0	0	0	0	0	9	273	0.0101323	273	0.0048077
Actinobacteria	0	0	8	11041	0.201486	11041	0.0479773	0	0	5	2643	0.0786379	2643	0.0409508	0	0	5	5517	0.419628	5517	0.128811	1545	0.0567739	4	28184	1.24314	29729	0.595952	4474	0.149931	658	136804	5.07742	141278	2.48799
Coriobacteriia	0	0	4	442	0.00806599	442	0.00192065	0	0	0	0	0	0	0	0	0	0	0	0	0	0	0	0	0	0	0	0	0	0	0	0	0	0	0	0
Rubrobacteria	0	0	0	0	0	0	0	0	0	3	12562	0.37376	12562	0.194636	0	0	0	0	0	0	0	0	0	0	0	0	0	0	0	0	0	0	0	0	0
Chthonomonadetes	0	0	0	0	0	0	0	0	0	0	0	0	0	0	0	0	0	0	0	0	0	0	0	2	45	0.00198486	45	0.000902076	0	0	0	0	0	0	0
Anaerolineae	0	0	24	2153	0.0392898	2153	0.00935559	0	0	70	3427	0.101964	3427	0.0530982	0	0	37	1669	0.126946	1669	0.0389678	0	0	0	0	0	0	0	0	0	17	604	0.0224172	604	0.0106368
Ardenticatenia	0	0	5	449	0.00819374	449	0.00195107	0	0	0	0	0	0	0	0	0	0	0	0	0	0	0	0	0	0	0	0	0	0	0	0	0	0	0	0
unclassified Chloroflexi	0	0	38	6326	0.115442	6326	0.0274888	0	0	9	2236	0.0665283	2236	0.0346447	0	0	5	2045	0.155545	2045	0.0477466	0	0	3	1205	0.05315	1205	0.0241556	0	0	4	827	0.0306938	827	0.014564
Candidatus Margulisbacteria	0	0	0	0	0	0	0	0	0	2	1393	0.0414463	1393	0.0215832	0	0	2	1248	0.094924	1248	0.0291383	0	0	0	0	0	0	0	0	0	0	0	0	0	0
Candidatus Melainabacteria	0	0	12	6260	0.114238	6260	0.027202	0	0	6	997	0.029664	997	0.0154476	0	0	4	114	0.00867094	114	0.00266167	0	0	8	3082	0.135941	3082	0.0617822	0	0	0	0	0	0	0
Nostocales	0	0	0	0	0	0	0	0	0	3	229	0.0068135	229	0.00354814	0	0	2	1184	0.0900561	1184	0.027644	0	0	0	0	0	0	0	0	0	0	0	0	0	0
Oscillatoriophycideae	0	0	0	0	0	0	0	0	0	0	0	0	0	0	0	0	0	0	0	0	0	0	0	0	0	0	0	0	0	0	0	0	0	0	0
Bacilli	0	0	91	16975	0.309774	16975	0.0737627	0	0	17	5898	0.175485	5898	0.091384	0	0	8	2763	0.210156	2763	0.0645105	0	0	40	5508	0.242946	5508	0.110414	0	0	60	11090	0.411601	11090	0.195302
Clostridia	1501775	8.56533	1222	627899	11.4584	2129674	9.25423	6127	0.198085	257	339993	10.1159	346120	5.36281	5225	0.176027	206	269416	20.492	274641	6.41231	159521	5.86189	939	371211	16.3733	530732	10.6391	28392	0.951464	791	259334	9.62508	287726	5.06703
environmental samples <clostridial firmicutes>	0	0	0	0	0	0	0	0	0	0	0	0	0	0	0	0	0	0	0	0	0	0	0	0	0	0	0	0	0	0	0	0	0	0	0
Erysipelotrichia	0	0	0	0	0	0	0	0	0	0	0	0	0	0	0	0	0	0	0	0	0	0	0	0	0	0	0	0	0	0	0	0	0	0	0
Limnochordia	0	0	0	0	0	0	0	0	0	0	0	0	0	0	0	0	0	0	0	0	0	0	0	0	0	0	0	0	0	0	0	0	0	0	0
Negativicutes	0	0	16	4325	0.0789263	4325	0.0187937	0	0	12	18051	0.537076	18051	0.279683	0	0	6	2171	0.165128	2171	0.0506885	0	0	4	1416	0.0624568	1416	0.0283853	0	0	0	0	0	0	0
Tissierellia	0	0	115	8731	0.159331	8731	0.0379395	0	0	4	205	0.00609942	205	0.00317628	0	0	0	0	0	0	0	0	0	6	1213	0.0535029	1213	0.024316	0	0	8	1098	0.0407518	1098	0.0193365
unclassified Firmicutes sensu stricto	0	0	141	30108	0.549437	30108	0.13083	0	0	21	12406	0.369119	12406	0.192219	0	0	23	5839	0.44412	5839	0.136329	0	0	21	9489	0.41854	9489	0.190218	0	0	119	11564	0.429193	11564	0.203649
Mollicutes	0	0	178	21809	0.397989	21809	0.0947682	0	0	0	0	0	0	0	0	0	0	0	0	0	0	0	0	0	0	0	0	0	0	0	18	546	0.0202646	546	0.0096154
unclassified Tenericutes	0	0	23	2735	0.0499106	2735	0.0118846	0	0	0	0	0	0	0	0	0	0	0	0	0	0	0	0	0	0	0	0	0	0	0	0	0	0	0	0
Thermotogae	0	0	233	97208	1.77393	97208	0.422405	0	0	7	3395	0.101012	3395	0.0526023	0	0	7	4945	0.376121	4945	0.115456	12234	0.449561	62	123687	5.45557	135921	2.72469	2812	0.0942349	157	24873	0.923151	27685	0.48755
candidate division KSB1	0	0	0	0	0	0	0	0	0	0	0	0	0	0	0	0	0	0	0	0	0	0	0	0	0	0	0	0	0	0	0	0	0	0	0
candidate division SR1	0	0	0	0	0	0	0	0	0	0	0	0	0	0	0	0	0	0	0	0	0	0	0	7	1205	0.05315	1205	0.0241556	0	0	10	612	0.0227141	612	0.0107777
Candidatus Atribacteria	0	0	0	0	0	0	0	0	0	2	1223	0.0363882	1223	0.0189492	0	0	0	0	0	0	0	0	0	0	0	0	0	0	0	0	0	0	0	0	0
Candidatus Riflebacteria bacterium HGW-Riflebacteria-1	0	0	0	0	0	0	0	0	0	0	0	0	0	0	0	0	0	0	0	0	0	0	0	0	0	0	0	0	0	0	8	326	0.0120994	326	0.00574106
Candidatus Riflebacteria bacterium HGW-Riflebacteria-2	0	0	0	0	0	0	0	0	0	0	0	0	0	0	0	0	0	0	0	0	0	0	0	0	0	0	0	0	0	0	7	255	0.00946422	255	0.00449071
Candidatus Saccharibacteria	0	0	0	0	0	0	0	0	0	0	0	0	0	0	0	0	0	0	0	0	0	0	0	0	0	0	0	0	0	0	0	0	0	0	0
Patescibacteria group	0	0	216	163293	2.97991	163293	0.709569	0	0	103	76609	2.27937	76609	1.18698	0	0	125	48518	3.69032	48518	1.1328	0	0	30	4758	0.209865	4758	0.0953795	0	0	31	2703	0.100321	2703	0.0476015
unclassified Bacteria (miscellaneous)	0	0	10	2311	0.0421731	2311	0.0100422	0	0	3	179	0.00532583	179	0.00277344	0	0	0	0	0	0	0	0	0	5	489	0.0215688	489	0.00980256	0	0	0	0	0	0	0
environmental samples <Archaea>	0	0	0	0	0	0	0	0	0	4	2664	0.0792627	2664	0.0412762	0	0	0	0	0	0	0	0	0	2	188	0.00829228	188	0.00376867	0	0	0	0	0	0	0
Thermoplasmata	0	0	5	10250	0.187051	10250	0.0445401	0	0	2	789	0.0234753	789	0.0122248	0	0	4	919	0.0699	919	0.0214568	0	0	4	3324	0.146615	3324	0.0666334	0	0	6	4970	0.18446	4970	0.0875248
Methanobacteria	0	0	0	0	0	0	0	0	0	0	0	0	0	0	0	0	0	0	0	0	0	0	0	0	0	0	0	0	0	0	5	1286	0.0477294	1286	0.0226473
Methanococci	0	0	0	0	0	0	0	0	0	0	0	0	0	0	0	0	0	0	0	0	0	0	0	0	0	0	0	0	0	0	0	0	0	0	0
Halobacteria	0	0	0	0	0	0	0	0	0	8	1738952	51.7395	1738952	26.9434	0	0	0	0	0	0	0	0	0	0	0	0	0	0	0	0	11	69557	2.58158	69557	1.22494
Methanomicrobia	15917726	90.7863	1367	2768726	50.5261	18686452	81.1996	3065023	99.092	556	504533	15.0115	3569556	55.3069	2909486	98.019	559	506254	38.5061	3415740	79.7506	2359367	86.6993	580	1078214	47.5577	3437581	68.9102	2884188	96.654	1406	1205702	44.7491	4089890	72.0255
unclassified Euryarchaeota	0	0	0	0	0	0	0	0	0	0	0	0	0	0	0	0	2	73	0.00555245	73	0.0017044	0	0	0	0	0	0	0	0	0	0	0	0	0	0
Pezizomycotina	0	0	0	0	0	0	0	0	0	0	0	0	0	0	1649	0.0555539	0	0	0	1649	0.0385008	0	0	0	0	0	0	0	0	0	0	0	0	0	0
Arthropoda	0	0	0	0	0	0	0	0	0	0	0	0	0	0	0	0	0	0	0	0	0	0	0	2	228	0.0100566	228	0.00457052	0	0	0	0	0	0	0
eudicotyledons	0	0	0	0	0	0	0	0	0	2	21872	0.650763	21872	0.338886	0	0	0	0	0	0	0	0	0	0	0	0	0	0	0	0	0	0	0	0	0
Liliopsida	0	0	0	0	0	0	0	0	0	0	0	0	0	0	0	0	0	0	0	0	0	0	0	0	0	0	0	0	0	0	0	0	0	0	0
Viruses	0	0	0	0	0	0	0	0	0	3	2635	0.0783998	2635	0.0408269	0	0	4	2211	0.168171	2211	0.0516224	0	0	0	0	0	0	0	0	0	6	940	0.0348877	940	0.016554
Not assigned	1294	0.00738029	301	95918	1.75039	97212	0.422422	200	0.00646599	10	720	0.0214223	920	0.0142545	184	0.00619886	12	953	0.072486	1137	0.0265467	848	0.0311613	91	193295	8.52583	194143	3.89182	209	0.00700394	233	12529	0.465009	12738	0.224324
sum	17533188	100	5903	5479796	100	23012984	100	3093109	100	3351	3360976	100	6454085	100	2968289	100	3121	1314736	100	4283025	100	2721323	100	3532	2267168	100	4988491	100	2984034	100	5663	2694358	100	5678392	100
all leaves/order	expected read counts	relative abundance	unexpected contig counts	unexpected read counts	relative abundance	total read counts	total relative abundance	expected read counts	relative abundance	unexpected contig counts	unexpected read counts	relative abundance	total read counts	total relative abundance	expected read counts	relative abundance	unexpected contig counts	unexpected read counts	relative abundance	total read counts	total relative abundance	expected read counts	relative abundance	unexpected contig counts	unexpected read counts	relative abundance	total read counts	total relative abundance	expected read counts	relative abundance	unexpected contig counts	unexpected read counts	relative abundance	total read counts	total relative abundance
Acidobacteria	0	0	4	9105	0.173892	9105	0.0402109	0	0	2	1404	0.0911413	1404	0.0304608	0	0	2	1510	0.1245	1510	0.0363454	0	0	2	645	0.0302935	645	0.013379	0	0	0	0	0	0	0
Caldisericales	0	0	0	0	0	0	0	0	0	0	0	0	0	0	0	0	0	0	0	0	0	0	0	0	0	0	0	0	0	0	0	0	0	0	0
Elusimicrobiales	0	0	0	0	0	0	0	0	0	2	7641	0.496019	7641	0.165777	0	0	0	0	0	0	0	0	0	0	0	0	0	0	0	0	0	0	0	0	0
Endomicrobiales	0	0	94	74075	1.41472	74075	0.327141	0	0	93	132130	8.57728	132130	2.86666	0	0	159	11325	0.933749	11325	0.27259	0	0	0	0	0	0	0	0	0	116	63754	2.53921	63754	1.16749
unclassified Elusimicrobia	0	0	11	15668	0.299235	15668	0.0691953	0	0	14	41501	2.69406	41501	0.900395	0	0	19	2076	0.171167	2076	0.0499689	0	0	0	0	0	0	0	0	0	16	7415	0.295327	7415	0.135786
environmental samples <Bacteria>	0	0	0	0	0	0	0	0	0	3	183	0.0118795	183	0.00397032	0	0	0	0	0	0	0	0	0	3	913	0.0428805	913	0.018938	0	0	0	0	0	0	0
Bacteroidales	0	0	44	145307	2.77515	145307	0.641726	0	0	81	13269	0.861363	13269	0.287881	0	0	33	27743	2.28742	27743	0.667768	0	0	25	3822	0.179506	3822	0.0792784	0	0	124	18130	0.722087	18130	0.332003
Marinilabiliales	0	0	9	2804	0.0535522	2804	0.0123834	0	0	26	3327	0.215974	3327	0.0721817	0	0	5	3922	0.32337	3922	0.0944017	0	0	9	1222	0.0573932	1222	0.0253475	0	0	131	13676	0.544692	13676	0.25044
unclassified Bacteroidia	0	0	0	0	0	0	0	0	0	2	377	0.0244731	377	0.0081793	0	0	0	0	0	0	0	0	0	2	751	0.0352719	751	0.0155777	0	0	0	0	0	0	0
Chitinophagales	0	0	0	0	0	0	0	0	0	0	0	0	0	0	0	0	0	0	0	0	0	0	0	0	0	0	0	0	0	0	0	0	0	0	0
Cytophagales	0	0	6	372	0.00710464	372	0.00164288	0	0	10	2091	0.135738	2091	0.0453658	0	0	4	544	0.0448529	544	0.013094	0	0	3	467	0.0219334	467	0.00968681	0	0	11	3022	0.120361	3022	0.0553399
Flavobacteriales	0	0	10	43756	0.835674	43756	0.193242	0	0	19	3478	0.225776	3478	0.0754578	0	0	15	11450	0.944055	11450	0.275599	0	0	12	7032	0.330269	7032	0.145862	0	0	27	6849	0.272784	6849	0.125421
Saprospirales	0	0	0	0	0	0	0	0	0	0	0	0	0	0	0	0	2	180	0.014841	180	0.00433256	0	0	0	0	0	0	0	0	0	0	0	0	0	0
Sphingobacteriales	0	0	0	0	0	0	0	0	0	2	593	0.0384949	593	0.0128656	0	0	0	0	0	0	0	0	0	0	0	0	0	0	0	0	0	0	0	0	0
unclassified Bacteroidetes	0	0	149	428728	8.18806	428728	1.89341	0	0	440	69362	4.50267	69362	1.50486	0	0	217	156725	12.922	156725	3.77234	0	0	275	45997	2.16032	45997	0.954099	0	0	449	111960	4.45917	111960	2.05025
Chlorobiales	0	0	0	0	0	0	0	0	0	2	85	0.00551781	85	0.00184414	0	0	2	106	0.00873972	106	0.0025514	0	0	0	0	0	0	0	0	0	0	0	0	0	0
unclassified Ignavibacteria	0	0	0	0	0	0	0	0	0	0	0	0	0	0	0	0	3	304	0.0250649	304	0.00731721	0	0	0	0	0	0	0	0	0	0	0	0	0	0
Candidatus Cloacimonetes	16392	0.0941683	284	383743	7.32892	400135	1.76714	0	0	441	33052	2.14559	33052	0.717088	0	0	332	27523	2.26928	27523	0.662473	158717	5.89628	234	28502	1.33864	187219	3.88342	13344	0.452336	81	251523	10.0177	264867	4.85034
Candidatus Tectomicrobia	0	0	0	0	0	0	0	0	0	0	0	0	0	0	0	0	0	0	0	0	0	0	0	0	0	0	0	0	0	0	0	0	0	0	0
Nitrospirales	0	0	0	0	0	0	0	0	0	2	220	0.0142814	220	0.00477306	0	0	3	262	0.021602	262	0.00630628	0	0	0	0	0	0	0	0	0	0	0	0	0	0
unclassified Nitrospirae	0	0	6	4384	0.0837278	4384	0.0193613	0	0	3	1057	0.0686156	1057	0.0229324	0	0	2	748	0.0616728	748	0.0180042	0	0	0	0	0	0	0	0	0	0	0	0	0	0
Rhizobiales	0	0	0	0	0	0	0	0	0	2	90	0.00584239	90	0.00195262	0	0	0	0	0	0	0	0	0	4	1074	0.0504421	1074	0.0222776	0	0	8	3580	0.142585	3580	0.0655582
Sphingomonadales	0	0	0	0	0	0	0	0	0	0	0	0	0	0	0	0	0	0	0	0	0	0	0	0	0	0	0	0	0	0	0	0	0	0	0
Burkholderiales	30142	0.173159	57	5339	0.101967	35481	0.156696	0	0	2	2890	0.187606	2890	0.0627007	19840	0.674432	39	1770	0.145937	21610	0.520148	0	0	2	352	0.0165322	352	0.00730141	18122	0.614301	44	2170	0.0864274	20292	0.371594
Rhodocyclales	0	0	0	0	0	0	0	0	0	0	0	0	0	0	0	0	0	0	0	0	0	0	0	0	0	0	0	0	0	0	4	230	0.0091605	230	0.00421184
unclassified Betaproteobacteria	0	0	0	0	0	0	0	0	0	0	0	0	0	0	0	0	0	0	0	0	0	0	0	0	0	0	0	0	0	0	5	176	0.00700978	176	0.00322297
Desulfobacterales	0	0	24	7690	0.146868	7690	0.0339617	0	0	24	3035	0.197018	3035	0.0658466	0	0	26	9530	0.785751	9530	0.229385	0	0	17	2789	0.13099	2789	0.0578512	0	0	22	16342	0.650874	16342	0.29926
Desulfovibrionales	17934	0.103027	7	21004	0.401145	38938	0.171964	2570	0.0837479	12	126792	8.23076	129362	2.8066	3141	0.106774	12	24450	2.01591	27591	0.664109	18606	0.691206	10	2444	0.114786	21050	0.436632	7877	0.267015	9	3745	0.149157	11622	0.212826
Desulfuromonadales	0	0	13	2152	0.0411	2152	0.00950398	0	0	8	543	0.0352491	543	0.0117808	0	0	6	305	0.0251473	305	0.00734128	0	0	12	2192	0.102951	2192	0.0454679	0	0	15	2287	0.0910873	2287	0.0418803
Myxococcales	0	0	0	0	0	0	0	0	0	2	135	0.00876359	135	0.00292893	0	0	2	461	0.0380096	461	0.0110962	0	0	2	690	0.032407	690	0.0143124	0	0	0	0	0	0	0
Syntrophobacterales	0	0	463	155680	2.97326	155680	0.687537	0	0	577	53227	3.45526	53227	1.1548	0	0	527	51472	4.24388	51472	1.23892	1929	0.0716617	530	91853	4.31402	93782	1.94529	1906	0.0646098	461	89695	3.5724	91601	1.67743
unclassified Deltaproteobacteria	0	0	12	32511	0.620911	32511	0.14358	0	0	12	13499	0.876294	13499	0.292871	0	0	8	6325	0.521498	6325	0.152241	0	0	8	4091	0.19214	4091	0.0848581	0	0	8	2984	0.118848	2984	0.054644
Campylobacterales	10460	0.0600903	4	6295	0.120225	16755	0.0739959	0	0	3	860	0.0558273	860	0.0186583	3395	0.115408	7	635	0.0523559	4030	0.0970012	0	0	0	0	0	0	0	0	0	4	5087	0.202606	5087	0.0931549
Alteromonadales	0	0	0	0	0	0	0	0	0	0	0	0	0	0	0	0	0	0	0	0	0	1823	0.0677238	0	0	0	1823	0.0378138	0	0	0	0	0	0	0
Chromatiales	0	0	0	0	0	0	0	0	0	0	0	0	0	0	0	0	3	131	0.010801	131	0.00315314	0	0	0	0	0	0	0	0	0	0	0	0	0	0
Enterobacterales	0	0	0	0	0	0	0	0	0	3	33597	2.18096	33597	0.728912	2031	0.0690409	0	0	0	2031	0.0488857	2680	0.099561	0	0	0	2680	0.0555903	0	0	5	1741	0.069341	1741	0.0318818
Methylococcales	0	0	0	0	0	0	0	0	0	2	145	0.00941274	145	0.00314588	0	0	4	185	0.0152533	185	0.00445291	0	0	0	0	0	0	0	0	0	0	0	0	0	0
Oceanospirillales	0	0	0	0	0	0	0	0	0	2	150	0.00973732	150	0.00325436	0	0	0	0	0	0	0	0	0	0	0	0	0	0	0	0	0	0	0	0	0
Pseudomonadales	0	0	6	560	0.0106952	560	0.00247316	0	0	3	652	0.0423249	652	0.0141456	0	0	0	0	0	0	0	0	0	0	0	0	0	0	0	0	4	287	0.0114307	287	0.00525564
unclassified Gammaproteobacteria	0	0	0	0	0	0	0	0	0	0	0	0	0	0	0	0	0	0	0	0	0	0	0	0	0	0	0	0	0	0	0	0	0	0	0
Vibrionales	0	0	0	0	0	0	0	0	0	2	125	0.00811443	125	0.00271197	0	0	0	0	0	0	0	0	0	0	0	0	0	0	0	0	0	0	0	0	0
Xanthomonadales	0	0	8	1071	0.0204545	1071	0.00472991	0	0	0	0	0	0	0	0	0	4	685	0.0564784	685	0.0164878	0	0	0	0	0	0	0	0	0	9	2348	0.0935168	2348	0.0429974
Candidatus Omnitrophica	0	0	20	3047	0.0581931	3047	0.0134566	0	0	0	0	0	0	0	0	0	0	0	0	0	0	0	0	0	0	0	0	0	0	0	0	0	0	0	0
Chlamydiales	0	0	0	0	0	0	0	0	0	0	0	0	0	0	2571	0.0873974	0	0	0	2571	0.0618834	0	0	0	0	0	0	0	0	0	0	0	0	0	0
unclassified Lentisphaerae	0	0	0	0	0	0	0	0	0	4	9333	0.605856	9333	0.202486	0	0	2	133	0.0109659	133	0.00320128	0	0	0	0	0	0	0	0	0	0	0	0	0	0
Planctomycetia	0	0	0	0	0	0	0	0	0	0	0	0	0	0	0	0	0	0	0	0	0	0	0	2	238	0.0111781	238	0.00493675	0	0	0	0	0	0	0
unclassified Planctomycetes	0	0	0	0	0	0	0	0	0	0	0	0	0	0	0	0	0	0	0	0	0	0	0	0	0	0	0	0	0	0	0	0	0	0	0
unclassified Verrucomicrobia	0	0	0	0	0	0	0	0	0	2	103	0.00668629	103	0.00223466	0	0	3	245	0.0202003	245	0.0058971	0	0	0	0	0	0	0	0	0	0	0	0	0	0
Leptospirales	0	0	0	0	0	0	0	0	0	0	0	0	0	0	0	0	0	0	0	0	0	0	0	0	0	0	0	0	0	0	0	0	0	0	0
Spirochaetales	0	0	20	12646	0.24152	12646	0.0558491	0	0	10	2363	0.153395	2363	0.051267	0	0	9	1523	0.125572	1523	0.0366583	0	0	28	10003	0.469807	10003	0.207489	0	0	34	10519	0.418954	10519	0.192628
unclassified Spirochaetes	0	0	161	118265	2.25868	118265	0.522299	0	0	36	1186	0.0769897	1186	0.0257312	0	0	24	888	0.0732158	888	0.021374	0	0	169	77179	3.62484	77179	1.6009	0	0	67	119902	4.77549	119902	2.19569
Synergistales	19115	0.109811	222	15270	0.291634	34385	0.151856	11398	0.371424	126	5074	0.329381	16472	0.357372	11609	0.394631	389	63527	5.23782	75136	1.80851	0	0	151	109769	5.15548	109769	2.2769	10252	0.347523	141	143663	5.72185	153915	2.81854
unclassified Synergistetes	0	0	0	0	0	0	0	0	0	0	0	0	0	0	0	0	0	0	0	0	0	0	0	0	0	0	0	0	0	0	9	273	0.0108731	273	0.00499927
Corynebacteriales	0	0	0	0	0	0	0	0	0	0	0	0	0	0	0	0	2	294	0.0242404	294	0.00707652	0	0	0	0	0	0	0	2478	0.0839995	634	112778	4.49175	115256	2.11061
Streptomycetales	0	0	0	0	0	0	0	0	0	0	0	0	0	0	0	0	0	0	0	0	0	0	0	0	0	0	0	0	0	0	0	0	0	0	0
Streptosporangiales	0	0	0	0	0	0	0	0	0	0	0	0	0	0	0	0	0	0	0	0	0	0	0	0	0	0	0	0	0	0	0	0	0	0	0
unclassified Actinobacteria (class)	0	0	4	10530	0.201107	10530	0.0465041	0	0	2	2234	0.145021	2234	0.0484683	0	0	3	5223	0.430638	5223	0.125716	0	0	3	27859	1.30844	27859	0.577869	0	0	8	19788	0.788122	19788	0.362365
Coriobacteriales	0	0	0	0	0	0	0	0	0	0	0	0	0	0	0	0	0	0	0	0	0	0	0	0	0	0	0	0	0	0	0	0	0	0	0
Rubrobacterales	0	0	0	0	0	0	0	0	0	3	12562	0.815468	12562	0.272542	0	0	0	0	0	0	0	0	0	0	0	0	0	0	0	0	0	0	0	0	0
Chthonomonadales	0	0	0	0	0	0	0	0	0	0	0	0	0	0	0	0	0	0	0	0	0	0	0	2	45	0.0021135	45	0.000933419	0	0	0	0	0	0	0
Anaerolineales	0	0	7	1271	0.0242742	1271	0.00561318	0	0	19	1084	0.0703684	1084	0.0235182	0	0	15	645	0.0531804	645	0.015525	0	0	0	0	0	0	0	0	0	8	329	0.0131035	329	0.00602476
unclassified Anaerolineae	0	0	12	593	0.0113254	593	0.00261889	0	0	35	1590	0.103216	1590	0.0344962	0	0	16	696	0.0573854	696	0.0167526	0	0	0	0	0	0	0	0	0	6	162	0.00645218	162	0.0029666
Ardenticatenales	0	0	4	402	0.0076776	402	0.00177537	0	0	0	0	0	0	0	0	0	0	0	0	0	0	0	0	0	0	0	0	0	0	0	0	0	0	0	0
unclassified Chloroflexi	0	0	38	6326	0.120817	6326	0.0279378	0	0	9	2236	0.145151	2236	0.0485117	0	0	5	2045	0.168611	2045	0.0492227	0	0	3	1205	0.0565948	1205	0.0249949	0	0	4	827	0.032938	827	0.0151443
Candidatus Margulisbacteria	0	0	0	0	0	0	0	0	0	2	1393	0.0904272	1393	0.0302222	0	0	2	1248	0.102898	1248	0.0300391	0	0	0	0	0	0	0	0	0	0	0	0	0	0
unclassified Candidatus Melainabacteria	0	0	11	5725	0.109339	5725	0.0252836	0	0	5	295	0.0191501	295	0.00640024	0	0	4	114	0.00939933	114	0.00274396	0	0	8	3082	0.144751	3082	0.0639288	0	0	0	0	0	0	0
Nostocales	0	0	0	0	0	0	0	0	0	3	229	0.0148656	229	0.00496833	0	0	2	1184	0.0976211	1184	0.0284986	0	0	0	0	0	0	0	0	0	0	0	0	0	0
Oscillatoriales	0	0	0	0	0	0	0	0	0	0	0	0	0	0	0	0	0	0	0	0	0	0	0	0	0	0	0	0	0	0	0	0	0	0	0
Bacillales	0	0	80	15904	0.303743	15904	0.0702376	0	0	14	3971	0.257779	3971	0.0861538	0	0	8	2763	0.22781	2763	0.0665048	0	0	40	5508	0.258692	5508	0.11425	0	0	52	7466	0.297358	7466	0.13672
Lactobacillales	0	0	7	619	0.011822	619	0.00273372	0	0	2	1831	0.11886	1831	0.0397249	0	0	0	0	0	0	0	0	0	0	0	0	0	0	0	0	5	3053	0.121596	3053	0.0559076
Clostridiales	1491148	8.56631	1086	567389	10.8363	2058537	9.09122	5483	0.178673	225	306947	19.9256	312430	6.7784	4773	0.162251	188	240628	19.8398	245401	5.90675	157219	5.84063	698	321566	15.1029	478785	9.93126	26974	0.914367	687	242176	9.64545	269150	4.92877
Halanaerobiales	0	0	5	2315	0.044213	2315	0.0102238	0	0	0	0	0	0	0	0	0	0	0	0	0	0	0	0	0	0	0	0	0	0	0	0	0	0	0	0
Natranaerobiales	0	0	0	0	0	0	0	0	0	0	0	0	0	0	0	0	0	0	0	0	0	0	0	0	0	0	0	0	0	0	0	0	0	0	0
Thermoanaerobacterales	0	0	22	14658	0.279946	14658	0.0647348	0	0	10	9258	0.600987	9258	0.200859	0	0	2	507	0.0418023	507	0.0122034	0	0	35	7466	0.350653	7466	0.154865	0	0	11	2452	0.0976589	2452	0.0449019
unclassified Clostridia	0	0	0	0	0	0	0	0	0	0	0	0	0	0	0	0	0	0	0	0	0	0	0	11	777	0.0364931	777	0.016117	0	0	0	0	0	0	0
environmental samples <clostridial firmicutes>	0	0	0	0	0	0	0	0	0	0	0	0	0	0	0	0	0	0	0	0	0	0	0	0	0	0	0	0	0	0	0	0	0	0	0
Erysipelotrichales	0	0	0	0	0	0	0	0	0	0	0	0	0	0	0	0	0	0	0	0	0	0	0	0	0	0	0	0	0	0	0	0	0	0	0
Limnochordales	0	0	0	0	0	0	0	0	0	0	0	0	0	0	0	0	0	0	0	0	0	0	0	0	0	0	0	0	0	0	0	0	0	0	0
Selenomonadales	0	0	14	4030	0.076967	4030	0.0177979	0	0	10	17973	1.16673	17973	0.389938	0	0	6	2171	0.178999	2171	0.0522555	0	0	4	1416	0.0665047	1416	0.0293716	0	0	0	0	0	0	0
Veillonellales	0	0	0	0	0	0	0	0	0	2	78	0.00506341	78	0.00169227	0	0	0	0	0	0	0	0	0	0	0	0	0	0	0	0	0	0	0	0	0
Tissierellales	0	0	0	0	0	0	0	0	0	3	185	0.0120094	185	0.00401371	0	0	0	0	0	0	0	0	0	4	1004	0.0471545	1004	0.0208256	0	0	6	914	0.036403	914	0.0167375
unclassified Tissierellia	0	0	110	8055	0.153838	8055	0.0355737	0	0	0	0	0	0	0	0	0	0	0	0	0	0	0	0	2	209	0.00981602	209	0.00433521	0	0	0	0	0	0	0
unclassified Firmicutes sensu stricto	0	0	141	30108	0.575018	30108	0.132967	0	0	21	12406	0.805341	12406	0.269157	0	0	23	5839	0.481427	5839	0.140543	0	0	21	9489	0.445666	9489	0.196827	0	0	119	11564	0.460574	11564	0.211764
Acholeplasmatales	0	0	177	21724	0.414896	21724	0.0959407	0	0	0	0	0	0	0	0	0	0	0	0	0	0	0	0	0	0	0	0	0	0	0	18	546	0.0217462	546	0.00999854
unclassified Tenericutes	0	0	23	2735	0.0522344	2735	0.0120787	0	0	0	0	0	0	0	0	0	0	0	0	0	0	0	0	0	0	0	0	0	0	0	0	0	0	0	0
Kosmotogales	0	0	208	86481	1.65166	86481	0.38193	0	0	6	3375	0.21909	3375	0.0732231	0	0	4	4416	0.3641	4416	0.106292	10308	0.382939	60	116227	5.45879	126535	2.62467	2389	0.0809825	130	21322	0.849219	23711	0.434204
Thermotogales	0	0	8	2618	0.0499999	2618	0.011562	0	0	0	0	0	0	0	0	0	0	0	0	0	0	0	0	0	0	0	0	0	0	0	0	0	0	0	0
candidate division KSB1	0	0	0	0	0	0	0	0	0	0	0	0	0	0	0	0	0	0	0	0	0	0	0	0	0	0	0	0	0	0	0	0	0	0	0
candidate division SR1	0	0	0	0	0	0	0	0	0	0	0	0	0	0	0	0	0	0	0	0	0	0	0	7	1205	0.0565948	1205	0.0249949	0	0	10	612	0.0243749	612	0.0112072
Candidatus Atribacteria	0	0	0	0	0	0	0	0	0	2	1223	0.0793916	1223	0.0265339	0	0	0	0	0	0	0	0	0	0	0	0	0	0	0	0	0	0	0	0	0
Candidatus Riflebacteria	0	0	0	0	0	0	0	0	0	0	0	0	0	0	0	0	0	0	0	0	0	0	0	0	0	0	0	0	0	0	117	4708	0.187512	4708	0.0862145
Candidatus Saccharibacteria	0	0	0	0	0	0	0	0	0	0	0	0	0	0	0	0	0	0	0	0	0	0	0	0	0	0	0	0	0	0	0	0	0	0	0
Patescibacteria group	0	0	216	163293	3.11865	163293	0.721159	0	0	103	76609	4.97311	76609	1.66209	0	0	125	48518	4.00032	48518	1.16782	0	0	30	4758	0.223467	4758	0.0986935	0	0	31	2703	0.107656	2703	0.0494983
unclassified Bacteria (miscellaneous)	0	0	10	2311	0.0441366	2311	0.0102062	0	0	3	179	0.0116199	179	0.00388354	0	0	0	0	0	0	0	0	0	5	489	0.0229667	489	0.0101431	0	0	0	0	0	0	0
environmental samples <Archaea>	0	0	0	0	0	0	0	0	0	4	2664	0.172935	2664	0.0577975	0	0	0	0	0	0	0	0	0	2	188	0.00882972	188	0.00389962	0	0	0	0	0	0	0
Methanomassiliicoccales	0	0	0	0	0	0	0	0	0	0	0	0	0	0	0	0	0	0	0	0	0	0	0	3	3175	0.149119	3175	0.0658579	0	0	0	0	0	0	0
Thermoplasmatales	0	0	5	10250	0.19576	10250	0.0452676	0	0	2	789	0.0512183	789	0.0171179	0	0	3	817	0.0673618	817	0.019665	0	0	0	0	0	0	0	0	0	0	0	0	0	0
Methanobacteriales	0	0	0	0	0	0	0	0	0	0	0	0	0	0	0	0	0	0	0	0	0	0	0	0	0	0	0	0	0	0	5	1286	0.0512192	1286	0.0235497
Methanococcales	0	0	0	0	0	0	0	0	0	0	0	0	0	0	0	0	0	0	0	0	0	0	0	0	0	0	0	0	0	0	0	0	0	0	0
Natrialbales	0	0	0	0	0	0	0	0	0	0	0	0	0	0	0	0	0	0	0	0	0	0	0	0	0	0	0	0	0	0	0	0	0	0	0
Methanocellales	0	0	0	0	0	0	0	0	0	2	2826	0.183451	2826	0.0613122	0	0	2	3257	0.26854	3257	0.0783953	0	0	3	3794	0.178191	3794	0.0786976	0	0	5	5369	0.213838	5369	0.098319
Methanomicrobiales	1654492	9.50468	1212	1829709	34.9447	3484201	15.3874	403606	13.1522	453	288407	18.7221	692013	15.0137	479985	16.3164	474	342929	28.2746	822914	19.8074	1001085	37.1899	504	902928	42.4075	1904013	39.4942	847384	28.7247	1161	944645	37.6236	1792029	32.8162
Methanosarcinales	14166153	81.3813	118	863576	16.493	15029729	66.3765	2645477	86.2074	87	203795	13.2294	2849272	61.8171	2412556	82.0114	68	139703	11.5185	2552259	61.4323	1338601	49.7285	60	131234	6.16362	1469835	30.4883	2019084	68.4431	210	234192	9.32746	2253276	41.2628
unclassified Methanomicrobia	0	0	0	0	0	0	0	0	0	0	0	0	0	0	0	0	0	0	0	0	0	0	0	0	0	0	0	0	0	0	0	0	0	0	0
Candidatus Altiarchaeales	0	0	0	0	0	0	0	0	0	0	0	0	0	0	0	0	2	73	0.00601887	73	0.00175709	0	0	0	0	0	0	0	0	0	0	0	0	0	0
Pezizomycotina	0	0	0	0	0	0	0	0	0	0	0	0	0	0	1649	0.0560554	0	0	0	1649	0.0396911	0	0	0	0	0	0	0	0	0	0	0	0	0	0
Arthropoda	0	0	0	0	0	0	0	0	0	0	0	0	0	0	0	0	0	0	0	0	0	0	0	2	228	0.0107084	228	0.00472932	0	0	0	0	0	0	0
Fabales	0	0	0	0	0	0	0	0	0	2	21872	1.41983	21872	0.474529	0	0	0	0	0	0	0	0	0	0	0	0	0	0	0	0	0	0	0	0	0
Poales	0	0	0	0	0	0	0	0	0	0	0	0	0	0	0	0	0	0	0	0	0	0	0	0	0	0	0	0	0	0	0	0	0	0	0
environmental samples <viruses>	0	0	0	0	0	0	0	0	0	2	165	0.0107111	165	0.0035798	0	0	3	2147	0.177021	2147	0.0516778	0	0	0	0	0	0	0	0	0	0	0	0	0	0
unclassified archaeal viruses	0	0	0	0	0	0	0	0	0	0	0	0	0	0	0	0	0	0	0	0	0	0	0	0	0	0	0	0	0	0	0	0	0	0	0
Not assigned	1294	0.00743374	301	95918	1.83189	97212	0.429322	200	0.00651735	10	720	0.0467391	920	0.0199601	184	0.00625481	12	953	0.0785751	1137	0.0273673	848	0.0315029	91	193295	9.07841	194143	4.02704	209	0.0070847	233	12529	0.499008	12738	0.233263
sum	17407130	100	5453	5236012	100	22643142	100	3068734	100	3015	1540465	100	4609199	100	2941734	100	2832	1212853	100	4154587	100	2691816	100	3098	2129172	100	4820988	100	2950019	100	5264	2510779	100	5460798	100
all leaves/family	expected read counts	relative abundance	unexpected contig counts	unexpected read counts	relative abundance	total read counts	total relative abundance	expected read counts	relative abundance	unexpected contig counts	unexpected read counts	relative abundance	total read counts	total relative abundance	expected read counts	relative abundance	unexpected contig counts	unexpected read counts	relative abundance	total read counts	total relative abundance	expected read counts	relative abundance	unexpected contig counts	unexpected read counts	relative abundance	total read counts	total relative abundance	expected read counts	relative abundance	unexpected contig counts	unexpected read counts	relative abundance	total read counts	total relative abundance
Acidobacteria	0	0	4	9105	0.207592	9105	0.0448342	0	0	2	1404	0.103987	1404	0.0345049	0	0	2	1510	0.151045	1510	0.0428821	0	0	2	645	0.036516	645	0.0178768	0	0	0	0	0	0	0
Caldisericaceae	0	0	0	0	0	0	0	0	0	0	0	0	0	0	0	0	0	0	0	0	0	0	0	0	0	0	0	0	0	0	0	0	0	0	0
Elusimicrobiaceae	0	0	0	0	0	0	0	0	0	2	7641	0.565927	7641	0.187786	0	0	0	0	0	0	0	0	0	0	0	0	0	0	0	0	0	0	0	0	0
Endomicrobiaceae	0	0	94	74075	1.68889	74075	0.364755	0	0	93	132130	9.78615	132130	3.24724	0	0	159	11325	1.13283	11325	0.321615	0	0	0	0	0	0	0	0	0	116	63754	2.88381	63754	1.43524
unclassified Elusimicrobia	0	0	11	15668	0.357226	15668	0.0771513	0	0	14	41501	3.07375	41501	1.01993	0	0	19	2076	0.207661	2076	0.0589557	0	0	0	0	0	0	0	0	0	16	7415	0.335406	7415	0.166928
environmental samples <Bacteria>	0	0	0	0	0	0	0	0	0	3	183	0.0135538	183	0.00449743	0	0	0	0	0	0	0	0	0	3	913	0.0516885	913	0.0253047	0	0	0	0	0	0	0
Bacteroidaceae	0	0	5	59754	1.36238	59754	0.294236	0	0	10	789	0.058437	789	0.0193906	0	0	3	2167	0.216764	2167	0.06154	0	0	0	0	0	0	0	0	0	8	840	0.0379961	840	0.0189102
Lentimicrobiaceae	0	0	0	0	0	0	0	0	0	4	1267	0.0938398	1267	0.031138	0	0	3	4697	0.469839	4697	0.133389	0	0	3	1077	0.0609732	1077	0.0298502	0	0	4	3019	0.13656	3019	0.0679642
Odoribacteraceae	0	0	0	0	0	0	0	0	0	2	283	0.0209603	283	0.00695505	0	0	0	0	0	0	0	0	0	0	0	0	0	0	0	0	0	0	0	0	0
Paludibacteraceae	0	0	0	0	0	0	0	0	0	0	0	0	0	0	0	0	0	0	0	0	0	0	0	0	0	0	0	0	0	0	0	0	0	0	0
Porphyromonadaceae	0	0	0	0	0	0	0	0	0	5	218	0.0161461	218	0.0053576	0	0	3	773	0.0773228	773	0.0219522	0	0	4	265	0.0150027	265	0.00734475	0	0	14	1390	0.0628745	1390	0.0312919
Prevotellaceae	0	0	0	0	0	0	0	0	0	4	264	0.019553	264	0.0064881	0	0	2	788	0.0788233	788	0.0223782	0	0	2	124	0.00702013	124	0.00343679	0	0	8	431	0.0194956	431	0.00970274
Rikenellaceae	0	0	0	0	0	0	0	0	0	4	1593	0.117985	1593	0.0391498	0	0	2	1076	0.107632	1076	0.030557	0	0	0	0	0	0	0	0	0	0	0	0	0	0
unclassified Bacteroidales	0	0	0	0	0	0	0	0	0	4	1314	0.0973209	1314	0.032293	0	0	2	690	0.0690204	690	0.0195951	0	0	0	0	0	0	0	0	0	0	0	0	0	0
Williamwhitmaniaceae	0	0	17	1126	0.0256725	1126	0.00554457	0	0	17	3523	0.26093	3523	0.0865817	0	0	4	6078	0.607979	6078	0.172607	0	0	0	0	0	0	0	0	0	4	514	0.02325	514	0.0115713
Marinifilaceae	0	0	0	0	0	0	0	0	0	0	0	0	0	0	0	0	0	0	0	0	0	0	0	0	0	0	0	0	0	0	0	0	0	0	0
Marinilabiliaceae	0	0	0	0	0	0	0	0	0	9	1410	0.104431	1410	0.0346524	0	0	0	0	0	0	0	0	0	3	272	0.015399	272	0.00753876	0	0	17	1774	0.0802442	1774	0.0399366
Prolixibacteraceae	0	0	0	0	0	0	0	0	0	2	297	0.0219972	297	0.00729911	0	0	0	0	0	0	0	0	0	0	0	0	0	0	0	0	4	615	0.0278186	615	0.013845
Salinivirgaceae	0	0	4	283	0.00645233	283	0.00139353	0	0	4	436	0.0322922	436	0.0107152	0	0	2	1146	0.114634	1146	0.0325449	0	0	0	0	0	0	0	0	0	87	8314	0.376071	8314	0.187166
unclassified Marinilabiliales	0	0	0	0	0	0	0	0	0	5	546	0.0404393	546	0.0134186	0	0	0	0	0	0	0	0	0	3	616	0.0348742	616	0.0170731	0	0	7	1508	0.0682121	1508	0.0339484
unclassified Bacteroidia	0	0	0	0	0	0	0	0	0	2	377	0.0279223	377	0.0092652	0	0	0	0	0	0	0	0	0	2	751	0.0425171	751	0.0208147	0	0	0	0	0	0	0
Chitinophagaceae	0	0	0	0	0	0	0	0	0	0	0	0	0	0	0	0	0	0	0	0	0	0	0	0	0	0	0	0	0	0	0	0	0	0	0
Cyclobacteriaceae	0	0	0	0	0	0	0	0	0	0	0	0	0	0	0	0	2	182	0.0182054	182	0.00516857	0	0	0	0	0	0	0	0	0	0	0	0	0	0
Cytophagaceae	0	0	0	0	0	0	0	0	0	3	483	0.0357732	483	0.0118703	0	0	0	0	0	0	0	0	0	0	0	0	0	0	0	0	0	0	0	0	0
Hymenobacteraceae	0	0	0	0	0	0	0	0	0	0	0	0	0	0	0	0	0	0	0	0	0	0	0	0	0	0	0	0	0	0	0	0	0	0	0
Flavobacteriaceae	0	0	9	43707	0.996508	43707	0.215219	0	0	16	3333	0.246857	3333	0.0819123	0	0	12	10287	1.029	10287	0.292138	0	0	10	6332	0.358479	6332	0.175498	0	0	21	6461	0.292253	6461	0.145451
unclassified Flavobacteriales	0	0	0	0	0	0	0	0	0	0	0	0	0	0	0	0	0	0	0	0	0	0	0	0	0	0	0	0	0	0	0	0	0	0	0
Saprospirales	0	0	0	0	0	0	0	0	0	0	0	0	0	0	0	0	2	180	0.0180053	180	0.00511177	0	0	0	0	0	0	0	0	0	0	0	0	0	0
Sphingobacteriaceae	0	0	0	0	0	0	0	0	0	2	593	0.0439203	593	0.0145736	0	0	0	0	0	0	0	0	0	0	0	0	0	0	0	0	0	0	0	0	0
unclassified Bacteroidetes	0	0	149	428728	9.77489	428728	2.11111	0	0	440	69362	5.13727	69362	1.70465	0	0	217	156725	15.6771	156725	4.45079	0	0	275	45997	2.60407	45997	1.27485	0	0	449	111960	5.06434	111960	2.52046
Chlorobiaceae	0	0	0	0	0	0	0	0	0	2	85	0.00629549	85	0.00208897	0	0	2	106	0.0106031	106	0.00301026	0	0	0	0	0	0	0	0	0	0	0	0	0	0
unclassified Ignavibacteria	0	0	0	0	0	0	0	0	0	0	0	0	0	0	0	0	3	304	0.030409	304	0.00863321	0	0	0	0	0	0	0	0	0	0	0	0	0	0
Candidatus Cloacimonetes	16392	0.102951	284	383743	8.74924	400135	1.97032	0	0	441	33052	2.44798	33052	0.81229	0	0	332	27523	2.75311	27523	0.781618	158717	8.6181	234	28502	1.61361	187219	5.18897	13344	0.59804	81	251523	11.3773	264867	5.96273
Candidatus Tectomicrobia	0	0	0	0	0	0	0	0	0	0	0	0	0	0	0	0	0	0	0	0	0	0	0	0	0	0	0	0	0	0	0	0	0	0	0
Nitrospiraceae	0	0	0	0	0	0	0	0	0	2	220	0.0162942	220	0.00540675	0	0	3	262	0.0262077	262	0.00744046	0	0	0	0	0	0	0	0	0	0	0	0	0	0
unclassified Nitrospirae	0	0	6	4384	0.0999541	4384	0.0215874	0	0	3	1057	0.0782863	1057	0.025977	0	0	2	748	0.0748221	748	0.0212422	0	0	0	0	0	0	0	0	0	0	0	0	0	0
Rhizobiales	0	0	0	0	0	0	0	0	0	2	90	0.00666581	90	0.00221185	0	0	0	0	0	0	0	0	0	4	1074	0.0608034	1074	0.029767	0	0	8	3580	0.161936	3580	0.0805936
Sphingomonadales	0	0	0	0	0	0	0	0	0	0	0	0	0	0	0	0	0	0	0	0	0	0	0	0	0	0	0	0	0	0	0	0	0	0	0
Burkholderiaceae	0	0	7	1169	0.0266529	1169	0.00575631	0	0	0	0	0	0	0	0	0	2	112	0.0112033	112	0.00318066	0	0	0	0	0	0	0	0	0	0	0	0	0	0
Comamonadaceae	15716	0.0987053	32	2003	0.0456679	17719	0.0872507	0	0	0	0	0	0	0	12276	0.486837	29	1268	0.126837	13544	0.384632	0	0	0	0	0	0	0	8281	0.371131	27	1340	0.0606128	9621	0.21659
Zoogloeaceae	0	0	0	0	0	0	0	0	0	0	0	0	0	0	0	0	0	0	0	0	0	0	0	0	0	0	0	0	0	0	4	230	0.0104037	230	0.0051778
unclassified Betaproteobacteria	0	0	0	0	0	0	0	0	0	0	0	0	0	0	0	0	0	0	0	0	0	0	0	0	0	0	0	0	0	0	5	176	0.00796109	176	0.00396214
Desulfobacteraceae	0	0	17	3899	0.0888962	3899	0.0191992	0	0	11	1888	0.139834	1888	0.0463997	0	0	11	8069	0.807138	8069	0.229149	0	0	8	938	0.0531039	938	0.0259976	0	0	12	13083	0.591789	13083	0.294527
Desulfobulbaceae	0	0	0	0	0	0	0	0	0	4	269	0.0199234	269	0.00661098	0	0	2	399	0.0399118	399	0.0113311	0	0	4	879	0.0497636	879	0.0243624	0	0	0	0	0	0	0
unclassified Desulfobacterales	0	0	0	0	0	0	0	0	0	3	226	0.0167386	226	0.00555421	0	0	3	199	0.0199059	199	0.00565134	0	0	2	176	0.00996405	176	0.00487802	0	0	0	0	0	0	0
Desulfohalobiaceae	0	0	0	0	0	0	0	0	0	2	6249	0.46283	6249	0.153576	0	0	0	0	0	0	0	0	0	0	0	0	0	0	0	0	0	0	0	0	0
Desulfovibrionaceae	17308	0.108704	6	20098	0.458229	37406	0.184192	2503	0.0920622	8	120322	8.9116	122825	3.01856	3083	0.122265	5	23892	2.38991	26975	0.766055	18285	0.992848	7	1894	0.107227	20179	0.559282	7727	0.346302	5	2254	0.101956	9981	0.224694
Desulfuromonadaceae	0	0	4	1009	0.0230049	1009	0.00496845	0	0	2	279	0.020664	279	0.00685674	0	0	2	105	0.0105031	105	0.00298187	0	0	3	967	0.0547457	967	0.0268014	0	0	5	757	0.0342417	757	0.0170417
Geobacteraceae	0	0	5	633	0.0144322	633	0.00311697	0	0	4	201	0.014887	201	0.0049398	0	0	2	60	0.00600177	60	0.00170392	0	0	8	983	0.0556515	983	0.0272449	0	0	7	1236	0.0559086	1236	0.027825
Cystobacterineae	0	0	0	0	0	0	0	0	0	0	0	0	0	0	0	0	0	0	0	0	0	0	0	0	0	0	0	0	0	0	0	0	0	0	0
Syntrophaceae	0	0	8	2026	0.0461923	2026	0.00997629	0	0	10	1562	0.115689	1562	0.0383879	0	0	5	1002	0.10023	1002	0.0284555	0	0	10	905	0.0512356	905	0.025083	0	0	5	900	0.0407101	900	0.020261
Syntrophobacteraceae	0	0	442	149281	3.40357	149281	0.735079	0	0	552	47184	3.49466	47184	1.1596	0	0	514	49967	4.99817	49967	1.419	1841	0.0999636	502	87798	4.97059	89639	2.48444	1859	0.0833151	450	87694	3.9667	89553	2.01603
Syntrophorhabdaceae	0	0	0	0	0	0	0	0	0	0	0	0	0	0	0	0	0	0	0	0	0	0	0	2	240	0.0135873	240	0.00665185	0	0	0	0	0	0	0
unclassified Syntrophobacterales	0	0	0	0	0	0	0	0	0	2	69	0.00511046	69	0.00169575	0	0	0	0	0	0	0	0	0	0	0	0	0	0	0	0	0	0	0	0	0
unclassified Deltaproteobacteria	0	0	12	32511	0.741242	32511	0.160088	0	0	12	13499	0.999798	13499	0.331753	0	0	8	6325	0.632687	6325	0.179622	0	0	8	4091	0.231608	4091	0.113386	0	0	8	2984	0.134977	2984	0.0671763
Campylobacteraceae	10148	0.0637352	0	0	0	10148	0.0499701	0	0	2	708	0.0524377	708	0.0173999	3309	0.131227	7	635	0.0635187	3944	0.112005	0	0	0	0	0	0	0	0	0	0	0	0	0	0
Moritellaceae	0	0	0	0	0	0	0	0	0	0	0	0	0	0	0	0	0	0	0	0	0	1817	0.0986604	0	0	0	1817	0.05036	0	0	0	0	0	0	0
Chromatiaceae	0	0	0	0	0	0	0	0	0	0	0	0	0	0	0	0	3	131	0.0131039	131	0.00372023	0	0	0	0	0	0	0	0	0	0	0	0	0	0
Enterobacteriaceae	0	0	0	0	0	0	0	0	0	3	33597	2.48835	33597	0.825684	2012	0.0797912	0	0	0	2012	0.0571382	2665	0.144706	0	0	0	2665	0.0738632	0	0	5	1741	0.0787514	1741	0.0391937
Methylococcaceae	0	0	0	0	0	0	0	0	0	0	0	0	0	0	0	0	2	93	0.00930274	93	0.00264108	0	0	0	0	0	0	0	0	0	0	0	0	0	0
Oceanospirillaceae	0	0	0	0	0	0	0	0	0	0	0	0	0	0	0	0	0	0	0	0	0	0	0	0	0	0	0	0	0	0	0	0	0	0	0
Pseudomonadaceae	0	0	5	497	0.0113315	497	0.00244729	0	0	3	652	0.0482901	652	0.0160236	0	0	0	0	0	0	0	0	0	0	0	0	0	0	0	0	4	287	0.012982	287	0.00646099
sulfur-oxidizing symbionts	0	0	0	0	0	0	0	0	0	0	0	0	0	0	0	0	0	0	0	0	0	0	0	0	0	0	0	0	0	0	0	0	0	0	0
Vibrionaceae	0	0	0	0	0	0	0	0	0	2	125	0.00925807	125	0.00307202	0	0	0	0	0	0	0	0	0	0	0	0	0	0	0	0	0	0	0	0	0
Xanthomonadaceae	0	0	8	1071	0.0244185	1071	0.00527374	0	0	0	0	0	0	0	0	0	4	685	0.0685202	685	0.0194531	0	0	0	0	0	0	0	0	0	8	2238	0.101232	2238	0.0503822
Candidatus Omnitrophica	0	0	20	3047	0.0694708	3047	0.0150038	0	0	0	0	0	0	0	0	0	0	0	0	0	0	0	0	0	0	0	0	0	0	0	0	0	0	0	0
Chlamydiaceae	0	0	0	0	0	0	0	0	0	0	0	0	0	0	2571	0.10196	0	0	0	2571	0.0730131	0	0	0	0	0	0	0	0	0	0	0	0	0	0
unclassified Lentisphaerae	0	0	0	0	0	0	0	0	0	4	9333	0.691245	9333	0.229369	0	0	2	133	0.0133039	133	0.00377703	0	0	0	0	0	0	0	0	0	0	0	0	0	0
Planctomycetia	0	0	0	0	0	0	0	0	0	0	0	0	0	0	0	0	0	0	0	0	0	0	0	2	238	0.0134741	238	0.00659641	0	0	0	0	0	0	0
unclassified Planctomycetes	0	0	0	0	0	0	0	0	0	0	0	0	0	0	0	0	0	0	0	0	0	0	0	0	0	0	0	0	0	0	0	0	0	0	0
unclassified Verrucomicrobia	0	0	0	0	0	0	0	0	0	2	103	0.00762865	103	0.00253134	0	0	3	245	0.0245072	245	0.00695769	0	0	0	0	0	0	0	0	0	0	0	0	0	0
Leptospiraceae	0	0	0	0	0	0	0	0	0	0	0	0	0	0	0	0	0	0	0	0	0	0	0	0	0	0	0	0	0	0	0	0	0	0	0
Spirochaetaceae	0	0	20	12646	0.288326	12646	0.0622706	0	0	10	2363	0.175015	2363	0.0580734	0	0	9	1523	0.152345	1523	0.0432512	0	0	28	10003	0.566309	10003	0.277243	0	0	34	10519	0.475811	10519	0.236806
unclassified Spirochaetes	0	0	161	118265	2.69641	118265	0.582352	0	0	36	1186	0.0878406	1186	0.0291473	0	0	24	888	0.0888262	888	0.0252181	0	0	169	77179	4.36941	77179	2.1391	0	0	67	119902	5.42358	119902	2.69925
Synergistaceae	18367	0.115355	19	2107	0.0480391	20474	0.100817	11043	0.40617	12	457	0.0338475	11500	0.282626	10931	0.433498	36	6133	0.613481	17064	0.484596	0	0	15	6804	0.385201	6804	0.18858	8989	0.402861	32	11575	0.523577	20564	0.46294
unclassified Synergistales	0	0	184	11860	0.270405	11860	0.0584002	0	0	97	3956	0.292999	3956	0.0972232	0	0	316	50437	5.04519	50437	1.43235	0	0	123	96227	5.44779	96227	2.66703	0	0	90	128733	5.82304	128733	2.89806
unclassified Synergistetes	0	0	0	0	0	0	0	0	0	0	0	0	0	0	0	0	0	0	0	0	0	0	0	0	0	0	0	0	0	0	9	273	0.0123487	273	0.00614582
Corynebacteriaceae	0	0	0	0	0	0	0	0	0	0	0	0	0	0	0	0	0	0	0	0	0	0	0	0	0	0	0	0	2097	0.0939816	630	112224	5.07628	114321	2.57361
Mycobacteriaceae	0	0	0	0	0	0	0	0	0	0	0	0	0	0	0	0	2	294	0.0294087	294	0.00834922	0	0	0	0	0	0	0	0	0	0	0	0	0	0
Streptomycetaceae	0	0	0	0	0	0	0	0	0	0	0	0	0	0	0	0	0	0	0	0	0	0	0	0	0	0	0	0	0	0	0	0	0	0	0
Streptosporangiaceae	0	0	0	0	0	0	0	0	0	0	0	0	0	0	0	0	0	0	0	0	0	0	0	0	0	0	0	0	0	0	0	0	0	0	0
unclassified Actinobacteria (class)	0	0	4	10530	0.240081	10530	0.0518511	0	0	2	2234	0.16546	2234	0.0549031	0	0	3	5223	0.522454	5223	0.148326	0	0	3	27859	1.57721	27859	0.772141	0	0	8	19788	0.89508	19788	0.445471
Coriobacteriaceae	0	0	0	0	0	0	0	0	0	0	0	0	0	0	0	0	0	0	0	0	0	0	0	0	0	0	0	0	0	0	0	0	0	0	0
Rubrobacteraceae	0	0	0	0	0	0	0	0	0	3	12562	0.930399	12562	0.308725	0	0	0	0	0	0	0	0	0	0	0	0	0	0	0	0	0	0	0	0	0
Chthonomonadaceae	0	0	0	0	0	0	0	0	0	0	0	0	0	0	0	0	0	0	0	0	0	0	0	2	45	0.00254763	45	0.00124722	0	0	0	0	0	0	0
Anaerolineaceae	0	0	7	1271	0.0289785	1271	0.00625857	0	0	19	1084	0.080286	1084	0.0266405	0	0	15	645	0.064519	645	0.0183172	0	0	0	0	0	0	0	0	0	8	329	0.0148818	329	0.0074065
unclassified Anaerolineae	0	0	12	593	0.0135202	593	0.00292001	0	0	35	1590	0.117763	1590	0.0390761	0	0	16	696	0.0696205	696	0.0197655	0	0	0	0	0	0	0	0	0	6	162	0.00732782	162	0.00364697
Ardenticatenaceae	0	0	4	402	0.0091655	402	0.0019795	0	0	0	0	0	0	0	0	0	0	0	0	0	0	0	0	0	0	0	0	0	0	0	0	0	0	0	0
unclassified Chloroflexi	0	0	38	6326	0.144231	6326	0.03115	0	0	9	2236	0.165608	2236	0.0549522	0	0	5	2045	0.20456	2045	0.0580754	0	0	3	1205	0.0682198	1205	0.0333978	0	0	4	827	0.0374081	827	0.0186176
Candidatus Margulisbacteria	0	0	0	0	0	0	0	0	0	2	1393	0.103172	1393	0.0342346	0	0	2	1248	0.124837	1248	0.0354416	0	0	0	0	0	0	0	0	0	0	0	0	0	0
Candidatus Melainabacteria	0	0	12	6260	0.142726	6260	0.0308251	0	0	6	997	0.0738424	997	0.0245024	0	0	4	114	0.0114034	114	0.00323745	0	0	8	3082	0.174484	3082	0.0854208	0	0	0	0	0	0	0
Nostocales	0	0	0	0	0	0	0	0	0	3	229	0.0169608	229	0.00562794	0	0	2	1184	0.118435	1184	0.0336241	0	0	0	0	0	0	0	0	0	0	0	0	0	0
Oscillatoriales	0	0	0	0	0	0	0	0	0	0	0	0	0	0	0	0	0	0	0	0	0	0	0	0	0	0	0	0	0	0	0	0	0	0	0
Alicyclobacillaceae	0	0	0	0	0	0	0	0	0	0	0	0	0	0	0	0	0	0	0	0	0	0	0	0	0	0	0	0	0	0	0	0	0	0	0
Bacillaceae	0	0	17	5842	0.133196	5842	0.0287668	0	0	4	632	0.0468088	632	0.0155321	0	0	2	156	0.0156046	156	0.0044302	0	0	13	1204	0.0681632	1204	0.0333701	0	0	20	2802	0.126744	2802	0.0630791
Paenibacillaceae	0	0	16	2246	0.0512082	2246	0.0110596	0	0	3	2353	0.174274	2353	0.0578276	0	0	0	0	0	0	0	0	0	7	990	0.0560478	990	0.0274389	0	0	5	209	0.00945379	209	0.00470504
Planococcaceae	0	0	0	0	0	0	0	0	0	0	0	0	0	0	0	0	0	0	0	0	0	0	0	2	238	0.0134741	238	0.00659641	0	0	0	0	0	0	0
Sporolactobacillaceae	0	0	0	0	0	0	0	0	0	0	0	0	0	0	0	0	0	0	0	0	0	0	0	0	0	0	0	0	0	0	0	0	0	0	0
unclassified Bacillales	0	0	0	0	0	0	0	0	0	0	0	0	0	0	0	0	0	0	0	0	0	0	0	0	0	0	0	0	0	0	0	0	0	0	0
Carnobacteriaceae	0	0	4	452	0.0103055	452	0.00222571	0	0	0	0	0	0	0	0	0	0	0	0	0	0	0	0	0	0	0	0	0	0	0	0	0	0	0	0
Enterococcaceae	0	0	0	0	0	0	0	0	0	0	0	0	0	0	0	0	0	0	0	0	0	0	0	0	0	0	0	0	0	0	0	0	0	0	0
Caldicoprobacteraceae	0	0	0	0	0	0	0	0	0	0	0	0	0	0	0	0	0	0	0	0	0	0	0	2	412	0.0233249	412	0.011419	0	0	0	0	0	0	0
Clostridiaceae	0	0	43	5591	0.127473	5591	0.0275308	0	0	7	3611	0.267447	3611	0.0887444	0	0	7	736	0.0736217	736	0.0209015	0	0	68	10307	0.58352	10307	0.285669	0	0	29	10427	0.471649	10427	0.234734
Clostridiales Family XII. Incertae Sedis	0	0	0	0	0	0	0	0	0	0	0	0	0	0	0	0	0	0	0	0	0	0	0	0	0	0	0	0	0	0	0	0	0	0	0
Gracilibacteraceae	0	0	0	0	0	0	0	0	0	0	0	0	0	0	0	0	0	0	0	0	0	0	0	0	0	0	0	0	0	0	0	0	0	0	0
Hungateiclostridiaceae	0	0	20	10022	0.228499	10022	0.0493496	0	0	0	0	0	0	0	0	0	0	0	0	0	0	0	0	12	4061	0.229909	4061	0.112555	0	0	0	0	0	0	0
Lachnospiraceae	0	0	13	5605	0.127793	5605	0.0275997	0	0	2	262	0.0194049	262	0.00643895	0	0	0	0	0	0	0	0	0	4	278	0.0157387	278	0.00770505	0	0	8	4474	0.202374	4474	0.100719
Peptococcaceae	0	0	157	110784	2.52585	110784	0.545515	0	0	51	47971	3.55295	47971	1.17894	0	0	29	37105	3.71159	37105	1.05373	0	0	147	49536	2.80443	49536	1.37294	0	0	67	20385	0.922084	20385	0.458911
Peptostreptococcaceae	0	0	0	0	0	0	0	0	0	0	0	0	0	0	0	0	0	0	0	0	0	0	0	2	655	0.0370821	655	0.018154	0	0	8	1498	0.0677597	1498	0.0337232
Ruminococcaceae	0	0	18	5755	0.131213	5755	0.0283384	0	0	0	0	0	0	0	0	0	0	0	0	0	0	0	0	8	3281	0.18575	3281	0.0909363	0	0	42	5869	0.265475	5869	0.132124
Syntrophomonadaceae	1455175	9.13932	481	286200	6.52529	1741375	8.57476	2986	0.109827	96	189760	14.0545	192746	4.73695	2682	0.106362	86	131161	13.12	133843	3.80097	150407	8.16688	157	151876	8.5983	302283	8.37808	23783	1.06589	196	141574	6.40388	165357	3.72254
unclassified Clostridiales	0	0	10	1341	0.0305745	1341	0.00660326	0	0	2	172	0.0127391	172	0.0042271	0	0	3	187	0.0187055	187	0.00531056	0	0	5	639	0.0361763	639	0.0177105	0	0	6	334	0.015108	334	0.00751906
Halobacteroidaceae	0	0	0	0	0	0	0	0	0	0	0	0	0	0	0	0	0	0	0	0	0	0	0	0	0	0	0	0	0	0	0	0	0	0	0
Natranaerobiaceae	0	0	0	0	0	0	0	0	0	0	0	0	0	0	0	0	0	0	0	0	0	0	0	0	0	0	0	0	0	0	0	0	0	0	0
Thermoanaerobacteraceae	0	0	11	4427	0.100934	4427	0.0217991	0	0	7	2080	0.154054	2080	0.0511184	0	0	0	0	0	0	0	0	0	17	2796	0.158293	2796	0.077494	0	0	0	0	0	0	0
Thermoanaerobacterales Family III. Incertae Sedis	0	0	0	0	0	0	0	0	0	0	0	0	0	0	0	0	0	0	0	0	0	0	0	2	1137	0.06437	1137	0.0315131	0	0	0	0	0	0	0
Thermoanaerobacterales Family IV. Incertae Sedis	0	0	0	0	0	0	0	0	0	2	7113	0.526821	7113	0.17481	0	0	0	0	0	0	0	0	0	0	0	0	0	0	0	0	0	0	0	0	0
unclassified Thermoanaerobacterales	0	0	0	0	0	0	0	0	0	0	0	0	0	0	0	0	0	0	0	0	0	0	0	0	0	0	0	0	0	0	0	0	0	0	0
unclassified Clostridia	0	0	0	0	0	0	0	0	0	0	0	0	0	0	0	0	0	0	0	0	0	0	0	11	777	0.043989	777	0.0215354	0	0	0	0	0	0	0
environmental samples <clostridial firmicutes>	0	0	0	0	0	0	0	0	0	0	0	0	0	0	0	0	0	0	0	0	0	0	0	0	0	0	0	0	0	0	0	0	0	0	0
Erysipelotrichaceae	0	0	0	0	0	0	0	0	0	0	0	0	0	0	0	0	0	0	0	0	0	0	0	0	0	0	0	0	0	0	0	0	0	0	0
Limnochordaceae	0	0	0	0	0	0	0	0	0	0	0	0	0	0	0	0	0	0	0	0	0	0	0	0	0	0	0	0	0	0	0	0	0	0	0
Selenomonadaceae	0	0	0	0	0	0	0	0	0	0	0	0	0	0	0	0	0	0	0	0	0	0	0	2	147	0.00832225	147	0.00407426	0	0	0	0	0	0	0
Sporomusaceae	0	0	14	4030	0.091883	4030	0.0198442	0	0	10	17973	1.33116	17973	0.441707	0	0	5	2069	0.206961	2069	0.0587569	0	0	2	1269	0.0718431	1269	0.0351716	0	0	0	0	0	0	0
Veillonellaceae	0	0	0	0	0	0	0	0	0	2	78	0.00577704	78	0.00191694	0	0	0	0	0	0	0	0	0	0	0	0	0	0	0	0	0	0	0	0	0
Peptoniphilaceae	0	0	0	0	0	0	0	0	0	2	136	0.0100728	136	0.00334235	0	0	0	0	0	0	0	0	0	0	0	0	0	0	0	0	0	0	0	0	0
Tissierellaceae	0	0	0	0	0	0	0	0	0	0	0	0	0	0	0	0	0	0	0	0	0	0	0	3	563	0.0318736	563	0.0156041	0	0	0	0	0	0	0
unclassified Tissierellia	0	0	110	8055	0.183652	8055	0.0396639	0	0	0	0	0	0	0	0	0	0	0	0	0	0	0	0	2	209	0.0118323	209	0.00579265	0	0	0	0	0	0	0
unclassified Firmicutes sensu stricto	0	0	141	30108	0.686455	30108	0.148256	0	0	21	12406	0.918845	12406	0.304892	0	0	23	5839	0.584072	5839	0.16582	0	0	21	9489	0.537209	9489	0.262997	0	0	119	11564	0.52308	11564	0.260331
Acholeplasmataceae	0	0	177	21724	0.495302	21724	0.106972	0	0	0	0	0	0	0	0	0	0	0	0	0	0	0	0	0	0	0	0	0	0	0	18	546	0.0246975	546	0.0122916
unclassified Tenericutes	0	0	23	2735	0.0623573	2735	0.0134675	0	0	0	0	0	0	0	0	0	0	0	0	0	0	0	0	0	0	0	0	0	0	0	0	0	0	0	0
Kosmotogaceae	0	0	208	86481	1.97174	86481	0.425844	0	0	6	3375	0.249968	3375	0.0829445	0	0	4	4416	0.44173	4416	0.125409	10308	0.559709	60	116227	6.58007	126535	3.50705	2389	0.107068	130	21322	0.964468	23711	0.533786
Thermotogaceae	0	0	0	0	0	0	0	0	0	0	0	0	0	0	0	0	0	0	0	0	0	0	0	0	0	0	0	0	0	0	0	0	0	0	0
unclassified Thermotogales	0	0	6	2225	0.0507294	2225	0.0109562	0	0	0	0	0	0	0	0	0	0	0	0	0	0	0	0	0	0	0	0	0	0	0	0	0	0	0	0
candidate division KSB1	0	0	0	0	0	0	0	0	0	0	0	0	0	0	0	0	0	0	0	0	0	0	0	0	0	0	0	0	0	0	0	0	0	0	0
candidate division SR1	0	0	0	0	0	0	0	0	0	0	0	0	0	0	0	0	0	0	0	0	0	0	0	7	1205	0.0682198	1205	0.0333978	0	0	10	612	0.0276829	612	0.0137774
Candidatus Atribacteria	0	0	0	0	0	0	0	0	0	2	1223	0.090581	1223	0.0300566	0	0	0	0	0	0	0	0	0	0	0	0	0	0	0	0	0	0	0	0	0
Candidatus Riflebacteria bacterium HGW-Riflebacteria-1	0	0	0	0	0	0	0	0	0	0	0	0	0	0	0	0	0	0	0	0	0	0	0	0	0	0	0	0	0	0	8	326	0.0147461	326	0.00733897
Candidatus Riflebacteria bacterium HGW-Riflebacteria-2	0	0	0	0	0	0	0	0	0	0	0	0	0	0	0	0	0	0	0	0	0	0	0	0	0	0	0	0	0	0	7	255	0.0115345	255	0.0057406
Candidatus Saccharibacteria	0	0	0	0	0	0	0	0	0	0	0	0	0	0	0	0	0	0	0	0	0	0	0	0	0	0	0	0	0	0	0	0	0	0	0
Patescibacteria group	0	0	216	163293	3.72304	163293	0.804076	0	0	103	76609	5.67401	76609	1.88275	0	0	125	48518	4.85323	48518	1.37785	0	0	30	4758	0.269369	4758	0.131873	0	0	31	2703	0.122266	2703	0.0608504
unclassified Bacteria (miscellaneous)	0	0	10	2311	0.0526902	2311	0.0113797	0	0	3	179	0.0132576	179	0.00439913	0	0	0	0	0	0	0	0	0	5	489	0.0276842	489	0.0135531	0	0	0	0	0	0	0
environmental samples <Archaea>	0	0	0	0	0	0	0	0	0	4	2664	0.197308	2664	0.0654708	0	0	0	0	0	0	0	0	0	2	188	0.0106434	188	0.00521061	0	0	0	0	0	0	0
unclassified Methanomassiliicoccales	0	0	0	0	0	0	0	0	0	0	0	0	0	0	0	0	0	0	0	0	0	0	0	3	3175	0.179749	3175	0.0879984	0	0	0	0	0	0	0
unclassified Thermoplasmatales	0	0	5	10250	0.233697	10250	0.0504723	0	0	2	789	0.058437	789	0.0193906	0	0	3	817	0.0817241	817	0.0232018	0	0	0	0	0	0	0	0	0	0	0	0	0	0
Methanobacteriaceae	0	0	0	0	0	0	0	0	0	0	0	0	0	0	0	0	0	0	0	0	0	0	0	0	0	0	0	0	0	0	5	1286	0.0581702	1286	0.0289506
Methanococcales	0	0	0	0	0	0	0	0	0	0	0	0	0	0	0	0	0	0	0	0	0	0	0	0	0	0	0	0	0	0	0	0	0	0	0
Natrialbaceae	0	0	0	0	0	0	0	0	0	0	0	0	0	0	0	0	0	0	0	0	0	0	0	0	0	0	0	0	0	0	0	0	0	0	0
Methanocellaceae	0	0	0	0	0	0	0	0	0	2	2826	0.209307	2826	0.0694522	0	0	2	3257	0.325796	3257	0.0924946	0	0	3	3794	0.214793	3794	0.105155	0	0	5	5369	0.242858	5369	0.120868
Methanocalculaceae	0	0	7	2344	0.0534426	2344	0.0115422	0	0	3	4989	0.369508	4989	0.12261	0	0	2	6497	0.649892	6497	0.184506	0	0	4	18009	1.01956	18009	0.499138	0	0	9	30782	1.39238	30782	0.69297
Methanomicrobiaceae	302235	1.89821	644	1131746	25.8035	1433981	7.06111	67908	2.49771	261	149525	11.0745	217433	5.34366	79639	3.1583	273	184960	18.5015	264599	7.51427	160610	8.72088	323	563910	31.9252	724520	20.0808	134608	6.03275	443	568373	25.7095	702981	15.8256
Methanoregulaceae	0	0	8	2412	0.054993	2412	0.011877	0	0	3	306	0.0226638	306	0.0075203	0	0	2	125	0.0125037	125	0.00354984	0	0	3	1557	0.0881479	1557	0.0431539	0	0	14	12189	0.551351	12189	0.274401
Methanospirillaceae	13365	0.0839397	273	39282	0.895619	52647	0.259241	2124	0.0781223	7	5749	0.425797	7873	0.193488	2994	0.118735	11	3105	0.310592	6099	0.173204	0	0	3	8502	0.481332	8502	0.235642	13302	0.596158	431	55203	2.49702	68505	1.5422
unclassified Methanomicrobiales	13741	0.0863012	77	110767	2.52546	124508	0.613094	3555	0.130755	49	22169	1.64194	25724	0.632197	3927	0.155736	48	36599	3.66098	40526	1.15089	6481	0.351909	33	73355	4.15291	79836	2.21274	4837	0.216781	64	83861	3.79332	88698	1.99678
Methanosaetaceae	14048454	88.2322	53	668388	15.2391	14716842	72.4676	2581798	94.9604	59	186896	13.8424	2768694	68.0438	2394221	94.9492	33	104259	10.429	2498480	70.9536	1315729	71.4421	24	49409	2.79724	1365138	37.8362	871444	39.0556	57	66814	3.02223	938258	21.1222
Methanosarcinaceae	9945	0.0624602	54	157604	3.59333	167549	0.825033	46698	1.71759	24	15566	1.15289	62264	1.53021	2103	0.0834001	31	34333	3.43431	36436	1.03474	13963	0.75817	31	80304	4.54632	94267	2.61271	1138420	51.0207	148	167097	7.55837	1305517	29.39
unclassified Methanosarcinales	0	0	0	0	0	0	0	0	0	0	0	0	0	0	0	0	0	0	0	0	0	0	0	0	0	0	0	0	0	0	0	0	0	0	0
unclassified Methanomicrobia	0	0	0	0	0	0	0	0	0	0	0	0	0	0	0	0	0	0	0	0	0	0	0	0	0	0	0	0	0	0	0	0	0	0	0
unclassified Euryarchaeota	0	0	0	0	0	0	0	0	0	0	0	0	0	0	0	0	2	73	0.00730215	73	0.00207311	0	0	0	0	0	0	0	0	0	0	0	0	0	0
Pezizomycotina	0	0	0	0	0	0	0	0	0	0	0	0	0	0	1649	0.0653955	0	0	0	1649	0.0468295	0	0	0	0	0	0	0	0	0	0	0	0	0	0
Arthropoda	0	0	0	0	0	0	0	0	0	0	0	0	0	0	0	0	0	0	0	0	0	0	0	2	228	0.012908	228	0.00631925	0	0	0	0	0	0	0
Fabaceae	0	0	0	0	0	0	0	0	0	2	21872	1.61994	21872	0.537529	0	0	0	0	0	0	0	0	0	0	0	0	0	0	0	0	0	0	0	0	0
Poaceae	0	0	0	0	0	0	0	0	0	0	0	0	0	0	0	0	0	0	0	0	0	0	0	0	0	0	0	0	0	0	0	0	0	0	0
environmental samples <viruses>	0	0	0	0	0	0	0	0	0	2	165	0.0122207	165	0.00405506	0	0	3	2147	0.214763	2147	0.060972	0	0	0	0	0	0	0	0	0	0	0	0	0	0
unclassified archaeal viruses	0	0	0	0	0	0	0	0	0	0	0	0	0	0	0	0	0	0	0	0	0	0	0	0	0	0	0	0	0	0	0	0	0	0	0
Not assigned	1294	0.00812705	301	95918	2.18691	97212	0.478685	200	0.00735615	10	720	0.0533265	920	0.02261	184	0.00729701	12	953	0.0953281	1137	0.0322893	848	0.0460451	91	193295	10.9432	194143	5.38087	209	0.00936678	233	12529	0.56673	12738	0.28676
sum	15922140	100	4727	4386015	100	20308155	100	2718815	100	2708	1350173	100	4068988	100	2521581	100	2520	999705	100	3521286	100	1841671	100	2563	1766350	100	3608021	100	2231289	100	4390	2210753	100	4442042	100
all leaves/genus	expected read counts	relative abundance	unexpected contig counts	unexpected read counts	relative abundance	total read counts	total relative abundance	expected read counts	relative abundance	unexpected contig counts	unexpected read counts	relative abundance	total read counts	total relative abundance	expected read counts	relative abundance	unexpected contig counts	unexpected read counts	relative abundance	total read counts	total relative abundance	expected read counts	relative abundance	unexpected contig counts	unexpected read counts	relative abundance	total read counts	total relative abundance	expected read counts	relative abundance	unexpected contig counts	unexpected read counts	relative abundance	total read counts	total relative abundance
Acidobacteria	0	0	4	9105	0.245819	9105	0.0465712	0	0	2	1404	0.133712	1404	0.0372962	0	0	2	1510	0.188164	1510	0.045566	0	0	2	645	0.0416371	645	0.0191891	0	0	0	0	0	0	0
Caldisericum	0	0	0	0	0	0	0	0	0	0	0	0	0	0	0	0	0	0	0	0	0	0	0	0	0	0	0	0	0	0	0	0	0	0	0
Elusimicrobium	0	0	0	0	0	0	0	0	0	2	7641	0.7277	7641	0.202978	0	0	0	0	0	0	0	0	0	0	0	0	0	0	0	0	0	0	0	0	0
Endomicrobium	0	0	94	74075	1.9999	74075	0.378886	0	0	93	132130	12.5836	132130	3.50994	0	0	159	11325	1.41123	11325	0.341745	0	0	0	0	0	0	0	0	0	116	63754	3.48927	63754	1.5899
unclassified Elusimicrobia	0	0	11	15668	0.423009	15668	0.0801403	0	0	14	41501	3.9524	41501	1.10244	0	0	19	2076	0.258694	2076	0.0626457	0	0	0	0	0	0	0	0	0	16	7415	0.405825	7415	0.184915
environmental samples <Bacteria>	0	0	0	0	0	0	0	0	0	3	183	0.0174282	183	0.00486126	0	0	0	0	0	0	0	0	0	3	913	0.0589374	913	0.0271623	0	0	0	0	0	0	0
Bacteroides	0	0	4	59698	1.61174	59698	0.305349	0	0	10	789	0.0751414	789	0.0209592	0	0	3	2167	0.270034	2167	0.0653918	0	0	0	0	0	0	0	0	0	8	840	0.0459734	840	0.0209479
Lentimicrobium	0	0	0	0	0	0	0	0	0	4	1267	0.120664	1267	0.0336569	0	0	3	4697	0.585301	4697	0.141737	0	0	3	1077	0.0695242	1077	0.0320414	0	0	4	3019	0.165231	3019	0.0752878
Odoribacter	0	0	0	0	0	0	0	0	0	0	0	0	0	0	0	0	0	0	0	0	0	0	0	0	0	0	0	0	0	0	0	0	0	0	0
Paludibacter	0	0	0	0	0	0	0	0	0	0	0	0	0	0	0	0	0	0	0	0	0	0	0	0	0	0	0	0	0	0	0	0	0	0	0
Porphyromonas	0	0	0	0	0	0	0	0	0	2	110	0.010476	110	0.00292207	0	0	0	0	0	0	0	0	0	0	0	0	0	0	0	0	11	1038	0.05681	1038	0.0258856
unclassified Porphyromonadaceae	0	0	0	0	0	0	0	0	0	3	108	0.0102855	108	0.00286894	0	0	0	0	0	0	0	0	0	3	157	0.0101349	157	0.00467084	0	0	0	0	0	0	0
Prevotella	0	0	0	0	0	0	0	0	0	4	264	0.0251424	264	0.00701297	0	0	2	788	0.098194	788	0.0237788	0	0	2	124	0.00800465	124	0.00368907	0	0	7	401	0.0219468	401	0.0100001
Alistipes	0	0	0	0	0	0	0	0	0	0	0	0	0	0	0	0	0	0	0	0	0	0	0	0	0	0	0	0	0	0	0	0	0	0	0
Mucinivorans	0	0	0	0	0	0	0	0	0	0	0	0	0	0	0	0	0	0	0	0	0	0	0	0	0	0	0	0	0	0	0	0	0	0	0
unclassified Bacteroidales (miscellaneous)	0	0	0	0	0	0	0	0	0	4	1314	0.12514	1314	0.0349055	0	0	2	690	0.0859821	690	0.0208216	0	0	0	0	0	0	0	0	0	0	0	0	0	0
Williamwhitmania	0	0	17	1126	0.0304001	1126	0.00575938	0	0	17	3523	0.335517	3523	0.0935859	0	0	4	6078	0.75739	6078	0.183411	0	0	0	0	0	0	0	0	0	4	514	0.0281314	514	0.0128181
Marinifilaceae	0	0	0	0	0	0	0	0	0	0	0	0	0	0	0	0	0	0	0	0	0	0	0	0	0	0	0	0	0	0	0	0	0	0	0
Alkaliflexus	0	0	0	0	0	0	0	0	0	2	344	0.0327613	344	0.00913811	0	0	0	0	0	0	0	0	0	0	0	0	0	0	0	0	0	0	0	0	0
Alkalitalea	0	0	0	0	0	0	0	0	0	3	234	0.0222853	234	0.00621604	0	0	0	0	0	0	0	0	0	0	0	0	0	0	0	0	0	0	0	0	0
Marinilabilia	0	0	0	0	0	0	0	0	0	0	0	0	0	0	0	0	0	0	0	0	0	0	0	0	0	0	0	0	0	0	5	227	0.0124238	227	0.00566093
Saccharicrinis	0	0	0	0	0	0	0	0	0	2	514	0.0489514	514	0.013654	0	0	0	0	0	0	0	0	0	0	0	0	0	0	0	0	0	0	0	0	0
Draconibacterium	0	0	0	0	0	0	0	0	0	0	0	0	0	0	0	0	0	0	0	0	0	0	0	0	0	0	0	0	0	0	0	0	0	0	0
Salinivirga	0	0	0	0	0	0	0	0	0	0	0	0	0	0	0	0	0	0	0	0	0	0	0	0	0	0	0	0	0	0	15	1289	0.0705473	1289	0.0321451
unclassified Salinivirgaceae	0	0	0	0	0	0	0	0	0	3	375	0.0357136	375	0.0099616	0	0	2	1146	0.142805	1146	0.0345819	0	0	0	0	0	0	0	0	0	8	1130	0.0618452	1130	0.0281799
unclassified Marinilabiliales	0	0	0	0	0	0	0	0	0	5	546	0.051999	546	0.0145041	0	0	0	0	0	0	0	0	0	3	616	0.039765	616	0.0183264	0	0	7	1508	0.0825332	1508	0.0376065
unclassified Bacteroidia	0	0	0	0	0	0	0	0	0	2	377	0.0359041	377	0.0100147	0	0	0	0	0	0	0	0	0	2	751	0.0484798	751	0.0223427	0	0	0	0	0	0	0
Hydrotalea	0	0	0	0	0	0	0	0	0	0	0	0	0	0	0	0	0	0	0	0	0	0	0	0	0	0	0	0	0	0	0	0	0	0	0
Cecembia	0	0	0	0	0	0	0	0	0	0	0	0	0	0	0	0	2	182	0.0226793	182	0.00549206	0	0	0	0	0	0	0	0	0	0	0	0	0	0
Cytophagaceae	0	0	0	0	0	0	0	0	0	3	483	0.0459991	483	0.0128305	0	0	0	0	0	0	0	0	0	0	0	0	0	0	0	0	0	0	0	0	0
Pontibacter	0	0	0	0	0	0	0	0	0	0	0	0	0	0	0	0	0	0	0	0	0	0	0	0	0	0	0	0	0	0	0	0	0	0	0
Flavobacterium	0	0	0	0	0	0	0	0	0	5	1005	0.0957125	1005	0.0266971	0	0	2	392	0.0488478	392	0.0118291	0	0	0	0	0	0	0	0	0	0	0	0	0	0
unclassified Flavobacteriales (miscellaneous)	0	0	0	0	0	0	0	0	0	0	0	0	0	0	0	0	0	0	0	0	0	0	0	0	0	0	0	0	0	0	0	0	0	0	0
Saprospirales	0	0	0	0	0	0	0	0	0	0	0	0	0	0	0	0	2	180	0.0224301	180	0.00543171	0	0	0	0	0	0	0	0	0	0	0	0	0	0
Pedobacter	0	0	0	0	0	0	0	0	0	0	0	0	0	0	0	0	0	0	0	0	0	0	0	0	0	0	0	0	0	0	0	0	0	0	0
Sphingobacterium	0	0	0	0	0	0	0	0	0	0	0	0	0	0	0	0	0	0	0	0	0	0	0	0	0	0	0	0	0	0	0	0	0	0	0
unclassified Bacteroidetes (miscellaneous)	0	0	149	428728	11.5749	428728	2.1929	0	0	440	69362	6.60578	69362	1.84255	0	0	217	156725	19.5298	156725	4.72936	0	0	275	45997	2.96927	45997	1.36844	0	0	449	111960	6.1276	111960	2.79206
Prosthecochloris	0	0	0	0	0	0	0	0	0	0	0	0	0	0	0	0	2	106	0.0132088	106	0.00319867	0	0	0	0	0	0	0	0	0	0	0	0	0	0
unclassified Ignavibacteria	0	0	0	0	0	0	0	0	0	0	0	0	0	0	0	0	3	304	0.037882	304	0.00917356	0	0	0	0	0	0	0	0	0	0	0	0	0	0
Candidatus Cloacimonas	0	0	150	52071	1.40583	52071	0.266338	0	0	22	2384	0.227043	2384	0.0633292	0	0	18	3265	0.406857	3265	0.0985252	141144	7.78864	151	16802	1.08463	157946	4.69899	8474	0.388217	18	26103	1.42862	34577	0.862281
unclassified Candidatus Cloacimonetes	0	0	64	97717	2.63819	97717	0.499813	0	0	132	10123	0.964077	10123	0.26891	0	0	104	6872	0.856331	6872	0.207371	0	0	46	9122	0.588858	9122	0.271385	0	0	29	51042	2.79354	51042	1.27289
unclassified Candidatus Tectomicrobia	0	0	0	0	0	0	0	0	0	0	0	0	0	0	0	0	0	0	0	0	0	0	0	0	0	0	0	0	0	0	0	0	0	0	0
Candidatus Sulfobium	0	0	0	0	0	0	0	0	0	0	0	0	0	0	0	0	2	196	0.0244239	196	0.00591453	0	0	0	0	0	0	0	0	0	0	0	0	0	0
unclassified Nitrospirae	0	0	6	4384	0.11836	4384	0.0224237	0	0	3	1057	0.100665	1057	0.0280784	0	0	2	748	0.0932095	748	0.0225718	0	0	0	0	0	0	0	0	0	0	0	0	0	0
Rhizobiales	0	0	0	0	0	0	0	0	0	2	90	0.00857127	90	0.00239078	0	0	0	0	0	0	0	0	0	4	1074	0.0693306	1074	0.0319521	0	0	8	3580	0.195934	3580	0.0892781
Sphingomonadales	0	0	0	0	0	0	0	0	0	0	0	0	0	0	0	0	0	0	0	0	0	0	0	0	0	0	0	0	0	0	0	0	0	0	0
Burkholderiaceae	0	0	7	1169	0.031561	1169	0.00597932	0	0	0	0	0	0	0	0	0	2	112	0.0139565	112	0.00337973	0	0	0	0	0	0	0	0	0	0	0	0	0	0
Brachymonas	0	0	4	208	0.00561564	208	0.0010639	0	0	0	0	0	0	0	7014	0.279289	20	915	0.11402	7929	0.239267	0	0	0	0	0	0	0	0	0	0	0	0	0	0
Comamonas	0	0	5	320	0.00863945	320	0.00163677	0	0	0	0	0	0	0	0	0	2	54	0.00672903	54	0.00162951	0	0	0	0	0	0	0	0	0	6	259	0.0141751	259	0.00645894
Variovorax	0	0	0	0	0	0	0	0	0	0	0	0	0	0	0	0	2	59	0.00735209	59	0.00178039	0	0	0	0	0	0	0	0	0	0	0	0	0	0
Thauera	0	0	0	0	0	0	0	0	0	0	0	0	0	0	0	0	0	0	0	0	0	0	0	0	0	0	0	0	0	0	4	230	0.012588	230	0.00573574
unclassified Betaproteobacteria (miscellaneous)	0	0	0	0	0	0	0	0	0	0	0	0	0	0	0	0	0	0	0	0	0	0	0	0	0	0	0	0	0	0	5	176	0.00963252	176	0.00438909
Candidatus Magnetomorum	0	0	0	0	0	0	0	0	0	0	0	0	0	0	0	0	0	0	0	0	0	0	0	0	0	0	0	0	0	0	0	0	0	0	0
Desulfatibacillum	0	0	0	0	0	0	0	0	0	3	920	0.0876174	920	0.0244391	0	0	2	7152	0.891223	7152	0.21582	0	0	0	0	0	0	0	0	0	4	8146	0.445833	8146	0.203145
Desulfatiglans	0	0	0	0	0	0	0	0	0	0	0	0	0	0	0	0	0	0	0	0	0	0	0	2	174	0.0112323	174	0.0051766	0	0	0	0	0	0	0
Desulfococcus	0	0	0	0	0	0	0	0	0	0	0	0	0	0	0	0	2	433	0.0539569	433	0.0130663	0	0	2	393	0.0253696	393	0.011692	0	0	0	0	0	0	0
Desulfotignum	0	0	0	0	0	0	0	0	0	0	0	0	0	0	0	0	0	0	0	0	0	0	0	0	0	0	0	0	0	0	0	0	0	0	0
unclassified Desulfobacteraceae	0	0	6	804	0.0217066	804	0.00411238	0	0	0	0	0	0	0	0	0	4	216	0.0269161	216	0.00651805	0	0	0	0	0	0	0	0	0	0	0	0	0	0
Desulfobulbus	0	0	0	0	0	0	0	0	0	3	223	0.0212377	223	0.00592383	0	0	0	0	0	0	0	0	0	3	807	0.0520948	807	0.0240087	0	0	0	0	0	0	0
unclassified Desulfobacterales	0	0	0	0	0	0	0	0	0	3	226	0.0215234	226	0.00600353	0	0	3	199	0.0247977	199	0.00600506	0	0	2	176	0.0113614	176	0.00523611	0	0	0	0	0	0	0
Desulfonauticus	0	0	0	0	0	0	0	0	0	2	6249	0.595132	6249	0.166	0	0	0	0	0	0	0	0	0	0	0	0	0	0	0	0	0	0	0	0	0
Desulfovibrio	16759	0.105757	0	0	0	16759	0.0857206	2419	0.0891162	7	120243	11.4515	122662	3.25843	2949	0.117425	3	23718	2.95554	26667	0.804708	17705	0.977002	4	569	0.036731	18274	0.543662	7433	0.340526	0	0	0	7433	0.185364
Pseudodesulfovibrio	0	0	0	0	0	0	0	0	0	0	0	0	0	0	0	0	0	0	0	0	0	0	0	0	0	0	0	0	0	0	0	0	0	0	0
Desulfuromonas	0	0	0	0	0	0	0	0	0	0	0	0	0	0	0	0	0	0	0	0	0	0	0	2	866	0.0559034	866	0.025764	0	0	0	0	0	0	0
Geobacter	0	0	4	345	0.00931441	345	0.00176464	0	0	4	201	0.0191425	201	0.00533942	0	0	2	60	0.0074767	60	0.00181057	0	0	8	983	0.0634562	983	0.0292448	0	0	6	510	0.0279124	510	0.0127184
Cystobacterineae	0	0	0	0	0	0	0	0	0	0	0	0	0	0	0	0	0	0	0	0	0	0	0	0	0	0	0	0	0	0	0	0	0	0	0
Desulfobacca	0	0	0	0	0	0	0	0	0	3	104	0.00990457	104	0.00276268	0	0	2	132	0.0164487	132	0.00398325	0	0	2	157	0.0101349	157	0.00467084	0	0	0	0	0	0	0
Desulfomonile	0	0	0	0	0	0	0	0	0	4	331	0.0315232	331	0.00879277	0	0	0	0	0	0	0	0	0	6	595	0.0384094	595	0.0177016	0	0	0	0	0	0	0
Smithella	0	0	0	0	0	0	0	0	0	2	1010	0.0961886	1010	0.0268299	0	0	2	807	0.100562	807	0.0243522	0	0	2	153	0.0098767	153	0.00455184	0	0	0	0	0	0	0
Syntrophus	0	0	0	0	0	0	0	0	0	0	0	0	0	0	0	0	0	0	0	0	0	0	0	0	0	0	0	0	0	0	0	0	0	0	0
Desulfacinum	0	0	8	2892	0.078079	2892	0.0147923	0	0	9	737	0.0701891	737	0.0195779	0	0	11	1342	0.167229	1342	0.0404964	0	0	7	1212	0.078239	1212	0.0360577	0	0	5	1032	0.0564816	1032	0.025736
Syntrophobacter	0	0	269	99585	2.68862	99585	0.509367	0	0	329	28681	2.73147	28681	0.76189	0	0	305	29992	3.73735	29992	0.905044	0	0	301	55868	3.60648	55868	1.66211	0	0	269	58556	3.20478	58556	1.46027
unclassified Syntrophobacteraceae	0	0	5	1036	0.0279702	1036	0.00529904	0	0	9	778	0.0740938	778	0.020667	0	0	5	342	0.0426172	342	0.0103203	0	0	7	717	0.0462849	717	0.0213312	0	0	6	1205	0.06595	1205	0.0300503
Syntrophorhabdus	0	0	0	0	0	0	0	0	0	0	0	0	0	0	0	0	0	0	0	0	0	0	0	2	240	0.0154929	240	0.00714014	0	0	0	0	0	0	0
unclassified Syntrophobacterales	0	0	0	0	0	0	0	0	0	2	69	0.0065713	69	0.00183293	0	0	0	0	0	0	0	0	0	0	0	0	0	0	0	0	0	0	0	0	0
SAR324 cluster	0	0	0	0	0	0	0	0	0	0	0	0	0	0	0	0	0	0	0	0	0	0	0	0	0	0	0	0	0	0	0	0	0	0	0
unclassified Deltaproteobacteria (miscellaneous)	0	0	12	32511	0.877741	32511	0.166291	0	0	12	13499	1.28559	13499	0.358591	0	0	7	6118	0.762374	6118	0.184618	0	0	7	3595	0.23207	3595	0.106953	0	0	8	2984	0.163315	2984	0.074415
Arcobacter	9992	0.0630538	0	0	0	9992	0.0511081	0	0	0	0	0	0	0	3264	0.129968	0	0	0	3264	0.098495	0	0	0	0	0	0	0	0	0	0	0	0	0	0
Campylobacter	0	0	0	0	0	0	0	0	0	0	0	0	0	0	0	0	6	594	0.0740193	594	0.0179246	0	0	0	0	0	0	0	0	0	0	0	0	0	0
Moritella	0	0	0	0	0	0	0	0	0	0	0	0	0	0	0	0	0	0	0	0	0	1817	0.100266	0	0	0	1817	0.0540568	0	0	0	0	0	0	0
Chromatiaceae	0	0	0	0	0	0	0	0	0	0	0	0	0	0	0	0	3	131	0.0163241	131	0.00395308	0	0	0	0	0	0	0	0	0	0	0	0	0	0
Salmonella	0	0	0	0	0	0	0	0	0	0	0	0	0	0	1851	0.0737045	0	0	0	1851	0.0558561	2384	0.131554	0	0	0	2384	0.0709254	0	0	0	0	0	0	0
Methylosarcina	0	0	0	0	0	0	0	0	0	0	0	0	0	0	0	0	2	93	0.0115889	93	0.00280638	0	0	0	0	0	0	0	0	0	0	0	0	0	0
Nitrincola	0	0	0	0	0	0	0	0	0	0	0	0	0	0	0	0	0	0	0	0	0	0	0	0	0	0	0	0	0	0	0	0	0	0	0
Pseudomonas	0	0	5	497	0.0134181	497	0.00254211	0	0	2	541	0.0515228	541	0.0143713	0	0	0	0	0	0	0	0	0	0	0	0	0	0	0	0	0	0	0	0	0
Solemya velum gill symbiont	0	0	0	0	0	0	0	0	0	0	0	0	0	0	0	0	0	0	0	0	0	0	0	0	0	0	0	0	0	0	0	0	0	0	0
Vibrio	0	0	0	0	0	0	0	0	0	2	125	0.0119045	125	0.00332053	0	0	0	0	0	0	0	0	0	0	0	0	0	0	0	0	0	0	0	0	0
Xanthomonas	0	0	5	518	0.0139851	518	0.00264952	0	0	0	0	0	0	0	0	0	3	549	0.0684118	549	0.0165667	0	0	0	0	0	0	0	0	0	4	1623	0.0888272	1623	0.0404744
unclassified Candidatus Omnitrophica	0	0	20	3047	0.0822638	3047	0.0155851	0	0	0	0	0	0	0	0	0	0	0	0	0	0	0	0	0	0	0	0	0	0	0	0	0	0	0	0
Chlamydia	0	0	0	0	0	0	0	0	0	0	0	0	0	0	2571	0.102374	0	0	0	2571	0.0775829	0	0	0	0	0	0	0	0	0	0	0	0	0	0
unclassified Lentisphaerae	0	0	0	0	0	0	0	0	0	4	9333	0.88884	9333	0.247924	0	0	2	133	0.0165734	133	0.00401343	0	0	0	0	0	0	0	0	0	0	0	0	0	0
Planctomycetia	0	0	0	0	0	0	0	0	0	0	0	0	0	0	0	0	0	0	0	0	0	0	0	2	238	0.0153638	238	0.00708064	0	0	0	0	0	0	0
unclassified Planctomycetes	0	0	0	0	0	0	0	0	0	0	0	0	0	0	0	0	0	0	0	0	0	0	0	0	0	0	0	0	0	0	0	0	0	0	0
unclassified Verrucomicrobia (miscellaneous)	0	0	0	0	0	0	0	0	0	2	103	0.00980934	103	0.00273612	0	0	3	245	0.0305299	245	0.00739316	0	0	0	0	0	0	0	0	0	0	0	0	0	0
Leptospira	0	0	0	0	0	0	0	0	0	0	0	0	0	0	0	0	0	0	0	0	0	0	0	0	0	0	0	0	0	0	0	0	0	0	0
Alkalispirochaeta	0	0	0	0	0	0	0	0	0	0	0	0	0	0	0	0	0	0	0	0	0	0	0	0	0	0	0	0	0	0	0	0	0	0	0
Marispirochaeta	0	0	0	0	0	0	0	0	0	0	0	0	0	0	0	0	0	0	0	0	0	0	0	0	0	0	0	0	0	0	0	0	0	0	0
Sediminispirochaeta	0	0	0	0	0	0	0	0	0	0	0	0	0	0	0	0	0	0	0	0	0	0	0	0	0	0	0	0	0	0	0	0	0	0	0
Sphaerochaeta	0	0	0	0	0	0	0	0	0	0	0	0	0	0	0	0	0	0	0	0	0	0	0	0	0	0	0	0	0	0	17	790	0.0432369	790	0.019701
Treponema	0	0	14	9840	0.265663	9840	0.0503306	0	0	4	160	0.0152378	160	0.00425028	0	0	5	178	0.0221809	178	0.00537136	0	0	20	7961	0.513911	7961	0.236845	0	0	10	8140	0.445504	8140	0.202995
unclassified Spirochaetes	0	0	161	118265	3.19295	118265	0.604914	0	0	36	1186	0.11295	1186	0.0315052	0	0	24	888	0.110655	888	0.0267964	0	0	169	77179	4.98218	77179	2.29612	0	0	67	119902	6.56227	119902	2.99012
Acetomicrobium	0	0	4	257	0.00693856	257	0.00131453	0	0	0	0	0	0	0	0	0	5	1069	0.13321	1069	0.0322583	0	0	2	671	0.0433155	671	0.0199627	0	0	0	0	0	0	0
Aminiphilus	0	0	0	0	0	0	0	0	0	0	0	0	0	0	0	0	0	0	0	0	0	0	0	2	779	0.0502873	779	0.0231757	0	0	0	0	0	0	0
Aminobacterium	17829	0.112509	0	0	0	17829	0.0911936	10742	0.395736	0	0	0	10742	0.285353	10669	0.424826	4	792	0.0986924	11461	0.345849	0	0	0	0	0	0	0	8685	0.397883	4	185	0.0101251	8870	0.2212
Aminomonas	0	0	0	0	0	0	0	0	0	0	0	0	0	0	0	0	0	0	0	0	0	0	0	0	0	0	0	0	0	0	0	0	0	0	0
Dethiosulfovibrio	0	0	0	0	0	0	0	0	0	0	0	0	0	0	0	0	2	147	0.0183179	147	0.0044359	0	0	0	0	0	0	0	0	0	0	0	0	0	0
Thermovirga	0	0	0	0	0	0	0	0	0	0	0	0	0	0	0	0	3	567	0.0706548	567	0.0171099	0	0	0	0	0	0	0	0	0	0	0	0	0	0
unclassified Synergistales	0	0	184	11860	0.3202	11860	0.0606627	0	0	97	3956	0.376755	3956	0.105088	0	0	316	50437	6.28504	50437	1.522	0	0	123	96227	6.2118	96227	2.86281	0	0	90	128733	7.04559	128733	3.21034
unclassified Synergistetes	0	0	0	0	0	0	0	0	0	0	0	0	0	0	0	0	0	0	0	0	0	0	0	0	0	0	0	0	0	0	9	273	0.0149414	273	0.00680808
Corynebacterium	0	0	0	0	0	0	0	0	0	0	0	0	0	0	0	0	0	0	0	0	0	0	0	0	0	0	0	0	2057	0.0942367	630	112224	6.14205	114281	2.84994
Mycobacteriaceae	0	0	0	0	0	0	0	0	0	0	0	0	0	0	0	0	2	294	0.0366358	294	0.00887179	0	0	0	0	0	0	0	0	0	0	0	0	0	0
Streptomyces	0	0	0	0	0	0	0	0	0	0	0	0	0	0	0	0	0	0	0	0	0	0	0	0	0	0	0	0	0	0	0	0	0	0	0
Streptosporangiaceae	0	0	0	0	0	0	0	0	0	0	0	0	0	0	0	0	0	0	0	0	0	0	0	0	0	0	0	0	0	0	0	0	0	0	0
unclassified Actinobacteria (class) (miscellaneous)	0	0	4	10530	0.284292	10530	0.0538599	0	0	2	2234	0.212758	2234	0.0593446	0	0	3	5223	0.650847	5223	0.15761	0	0	3	27859	1.7984	27859	0.828822	0	0	8	19788	1.083	19788	0.493473
Collinsella	0	0	0	0	0	0	0	0	0	0	0	0	0	0	0	0	0	0	0	0	0	0	0	0	0	0	0	0	0	0	0	0	0	0	0
unclassified Coriobacteriaceae	0	0	0	0	0	0	0	0	0	0	0	0	0	0	0	0	0	0	0	0	0	0	0	0	0	0	0	0	0	0	0	0	0	0	0
Rubrobacter	0	0	0	0	0	0	0	0	0	3	12562	1.19636	12562	0.3337	0	0	0	0	0	0	0	0	0	0	0	0	0	0	0	0	0	0	0	0	0
Chthonomonas	0	0	0	0	0	0	0	0	0	0	0	0	0	0	0	0	0	0	0	0	0	0	0	2	45	0.00290491	45	0.00133878	0	0	0	0	0	0	0
Brevefilum	0	0	0	0	0	0	0	0	0	11	713	0.0679035	713	0.0189403	0	0	5	270	0.0336452	270	0.00814757	0	0	0	0	0	0	0	0	0	0	0	0	0	0
unclassified Anaerolineaceae	0	0	0	0	0	0	0	0	0	2	103	0.00980934	103	0.00273612	0	0	0	0	0	0	0	0	0	0	0	0	0	0	0	0	0	0	0	0	0
unclassified Anaerolineae	0	0	12	593	0.01601	593	0.00303314	0	0	35	1590	0.151426	1590	0.0422372	0	0	16	696	0.0867297	696	0.0210026	0	0	0	0	0	0	0	0	0	6	162	0.0088663	162	0.00403996
Ardenticatenaceae	0	0	4	402	0.0108533	402	0.00205619	0	0	0	0	0	0	0	0	0	0	0	0	0	0	0	0	0	0	0	0	0	0	0	0	0	0	0	0
unclassified Chloroflexi (miscellaneous)	0	0	38	6326	0.170791	6326	0.0323569	0	0	9	2236	0.212948	2236	0.0593977	0	0	5	2045	0.254831	2045	0.0617103	0	0	3	1205	0.0777871	1205	0.0358495	0	0	4	827	0.0452619	827	0.0206237
Candidatus Margulisbacteria	0	0	0	0	0	0	0	0	0	2	1393	0.132664	1393	0.037004	0	0	2	1248	0.155515	1248	0.0376599	0	0	0	0	0	0	0	0	0	0	0	0	0	0
unclassified Candidatus Melainabacteria	0	0	11	5725	0.154565	5725	0.0292828	0	0	5	295	0.0280947	295	0.00783646	0	0	4	114	0.0142057	114	0.00344008	0	0	8	3082	0.198954	3082	0.0916913	0	0	0	0	0	0	0
Nostocales	0	0	0	0	0	0	0	0	0	3	229	0.0218091	229	0.00608322	0	0	2	1184	0.14754	1184	0.0357286	0	0	0	0	0	0	0	0	0	0	0	0	0	0
Oscillatoriales	0	0	0	0	0	0	0	0	0	0	0	0	0	0	0	0	0	0	0	0	0	0	0	0	0	0	0	0	0	0	0	0	0	0	0
Alicyclobacillus	0	0	0	0	0	0	0	0	0	0	0	0	0	0	0	0	0	0	0	0	0	0	0	0	0	0	0	0	0	0	0	0	0	0	0
Bacillus	0	0	10	1525	0.0411724	1525	0.00780023	0	0	2	144	0.013714	144	0.00382525	0	0	0	0	0	0	0	0	0	4	418	0.0269834	418	0.0124357	0	0	11	2310	0.126427	2310	0.0576068
Tepidibacillus	0	0	0	0	0	0	0	0	0	0	0	0	0	0	0	0	0	0	0	0	0	0	0	0	0	0	0	0	0	0	0	0	0	0	0
Paenibacillus	0	0	12	1613	0.0435482	1613	0.00825034	0	0	2	2129	0.202758	2129	0.0565553	0	0	0	0	0	0	0	0	0	3	380	0.0245304	380	0.0113052	0	0	5	209	0.0114386	209	0.00521204
Kurthia	0	0	0	0	0	0	0	0	0	0	0	0	0	0	0	0	0	0	0	0	0	0	0	0	0	0	0	0	0	0	0	0	0	0	0
Sporolactobacillus	0	0	0	0	0	0	0	0	0	0	0	0	0	0	0	0	0	0	0	0	0	0	0	0	0	0	0	0	0	0	0	0	0	0	0
Desulfuribacillus	0	0	0	0	0	0	0	0	0	0	0	0	0	0	0	0	0	0	0	0	0	0	0	0	0	0	0	0	0	0	0	0	0	0	0
Trichococcus	0	0	0	0	0	0	0	0	0	0	0	0	0	0	0	0	0	0	0	0	0	0	0	0	0	0	0	0	0	0	0	0	0	0	0
Enterococcus	0	0	0	0	0	0	0	0	0	0	0	0	0	0	0	0	0	0	0	0	0	0	0	0	0	0	0	0	0	0	0	0	0	0	0
Caldicoprobacter	0	0	0	0	0	0	0	0	0	0	0	0	0	0	0	0	0	0	0	0	0	0	0	2	412	0.0265961	412	0.0122572	0	0	0	0	0	0	0
Alkaliphilus	0	0	0	0	0	0	0	0	0	0	0	0	0	0	0	0	0	0	0	0	0	0	0	2	171	0.0110387	171	0.00508735	0	0	0	0	0	0	0
Clostridiisalibacter	0	0	0	0	0	0	0	0	0	0	0	0	0	0	0	0	0	0	0	0	0	0	0	0	0	0	0	0	0	0	0	0	0	0	0
Clostridium	0	0	29	3602	0.0972478	3602	0.0184239	0	0	5	3470	0.33047	3470	0.092178	0	0	6	701	0.0873528	701	0.0211535	0	0	18	4166	0.26893	4166	0.123941	0	0	17	5483	0.300086	5483	0.136735
Geosporobacter	0	0	0	0	0	0	0	0	0	0	0	0	0	0	0	0	0	0	0	0	0	0	0	0	0	0	0	0	0	0	0	0	0	0	0
Inediibacterium	0	0	0	0	0	0	0	0	0	0	0	0	0	0	0	0	0	0	0	0	0	0	0	0	0	0	0	0	0	0	0	0	0	0	0
Lutispora	0	0	0	0	0	0	0	0	0	0	0	0	0	0	0	0	0	0	0	0	0	0	0	2	164	0.0105868	164	0.0048791	0	0	0	0	0	0	0
Natronincola	0	0	0	0	0	0	0	0	0	0	0	0	0	0	0	0	0	0	0	0	0	0	0	2	154	0.00994126	154	0.00458159	0	0	0	0	0	0	0
Oxobacter	0	0	0	0	0	0	0	0	0	0	0	0	0	0	0	0	0	0	0	0	0	0	0	0	0	0	0	0	0	0	0	0	0	0	0
Paramaledivibacter	0	0	0	0	0	0	0	0	0	0	0	0	0	0	0	0	0	0	0	0	0	0	0	2	119	0.00768188	119	0.00354032	0	0	0	0	0	0	0
Youngiibacter	0	0	0	0	0	0	0	0	0	0	0	0	0	0	0	0	0	0	0	0	0	0	0	0	0	0	0	0	0	0	0	0	0	0	0
Acidaminobacter	0	0	0	0	0	0	0	0	0	0	0	0	0	0	0	0	0	0	0	0	0	0	0	0	0	0	0	0	0	0	0	0	0	0	0
Gracilibacter	0	0	0	0	0	0	0	0	0	0	0	0	0	0	0	0	0	0	0	0	0	0	0	0	0	0	0	0	0	0	0	0	0	0	0
Pseudoclostridium	0	0	4	7996	0.215878	7996	0.0408988	0	0	0	0	0	0	0	0	0	0	0	0	0	0	0	0	6	2424	0.156478	2424	0.0721154	0	0	0	0	0	0	0
Ruminiclostridium	0	0	8	1798	0.0485429	1798	0.00919659	0	0	0	0	0	0	0	0	0	0	0	0	0	0	0	0	6	1637	0.105674	1637	0.0487017	0	0	0	0	0	0	0
Thermoclostridium	0	0	8	228	0.00615561	228	0.0011662	0	0	0	0	0	0	0	0	0	0	0	0	0	0	0	0	0	0	0	0	0	0	0	0	0	0	0	0
Blautia	0	0	0	0	0	0	0	0	0	0	0	0	0	0	0	0	0	0	0	0	0	0	0	0	0	0	0	0	0	0	0	0	0	0	0
Parasporobacterium	0	0	0	0	0	0	0	0	0	0	0	0	0	0	0	0	0	0	0	0	0	0	0	0	0	0	0	0	0	0	0	0	0	0	0
unclassified Lachnospiraceae	0	0	0	0	0	0	0	0	0	0	0	0	0	0	0	0	0	0	0	0	0	0	0	0	0	0	0	0	0	0	0	0	0	0	0
Dehalobacter	0	0	8	1687	0.0455461	1687	0.00862884	0	0	0	0	0	0	0	0	0	0	0	0	0	0	0	0	3	365	0.0235621	365	0.010859	0	0	0	0	0	0	0
Dehalobacterium	0	0	7	21047	0.568233	21047	0.107653	0	0	0	0	0	0	0	0	0	2	956	0.119129	956	0.0288484	0	0	0	0	0	0	0	0	0	0	0	0	0	0
Desulfallas	0	0	10	39513	1.06678	39513	0.202105	0	0	0	0	0	0	0	0	0	0	0	0	0	0	0	0	8	1595	0.102963	1595	0.0474522	0	0	0	0	0	0	0
Desulfitibacter	0	0	4	1996	0.0538886	1996	0.0102093	0	0	0	0	0	0	0	0	0	0	0	0	0	0	0	0	2	130	0.00839197	130	0.00386758	0	0	0	0	0	0	0
Desulfitobacterium	0	0	8	2090	0.0564264	2090	0.0106901	0	0	0	0	0	0	0	0	0	0	0	0	0	0	0	0	5	1095	0.0706862	1095	0.0325769	0	0	5	421	0.0230414	421	0.0104989
Desulfofarcimen	0	0	0	0	0	0	0	0	0	0	0	0	0	0	0	0	0	0	0	0	0	0	0	0	0	0	0	0	0	0	0	0	0	0	0
Desulfofundulus	0	0	0	0	0	0	0	0	0	0	0	0	0	0	0	0	0	0	0	0	0	0	0	0	0	0	0	0	0	0	0	0	0	0	0
Desulfosporosinus	0	0	20	7569	0.20435	7569	0.0387147	0	0	6	4120	0.392373	4120	0.109445	0	0	9	11108	1.38419	11108	0.335197	0	0	11	6155	0.397327	6155	0.183115	0	0	6	4486	0.24552	4486	0.111872
Desulfotomaculum	0	0	33	11792	0.318364	11792	0.0603149	0	0	19	12094	1.15179	12094	0.321268	0	0	4	1357	0.169098	1357	0.0409491	0	0	35	10565	0.682009	10565	0.314315	0	0	20	10466	0.572807	10466	0.261001
Pelotomaculum	0	0	0	0	0	0	0	0	0	0	0	0	0	0	0	0	0	0	0	0	0	0	0	17	582	0.0375702	582	0.0173148	0	0	0	0	0	0	0
Syntrophobotulus	0	0	0	0	0	0	0	0	0	0	0	0	0	0	0	0	0	0	0	0	0	0	0	2	791	0.0510619	791	0.0235327	0	0	0	0	0	0	0
unclassified Peptococcaceae	0	0	9	2882	0.0778091	2882	0.0147411	0	0	3	777	0.0739986	777	0.0206404	0	0	0	0	0	0	0	0	0	4	665	0.0429282	665	0.0197841	0	0	4	1743	0.0953948	1743	0.0434669
Clostridioides	0	0	0	0	0	0	0	0	0	0	0	0	0	0	0	0	0	0	0	0	0	0	0	0	0	0	0	0	0	0	0	0	0	0	0
Criibacterium	0	0	0	0	0	0	0	0	0	0	0	0	0	0	0	0	0	0	0	0	0	0	0	0	0	0	0	0	0	0	4	513	0.0280766	513	0.0127932
Peptoclostridium	0	0	0	0	0	0	0	0	0	0	0	0	0	0	0	0	0	0	0	0	0	0	0	0	0	0	0	0	0	0	0	0	0	0	0
Hydrogenoanaerobacterium	0	0	0	0	0	0	0	0	0	0	0	0	0	0	0	0	0	0	0	0	0	0	0	0	0	0	0	0	0	0	0	0	0	0	0
Sporobacter	0	0	0	0	0	0	0	0	0	0	0	0	0	0	0	0	0	0	0	0	0	0	0	2	1327	0.0856626	1327	0.039479	0	0	0	0	0	0	0
unclassified Ruminococcaceae	0	0	0	0	0	0	0	0	0	0	0	0	0	0	0	0	0	0	0	0	0	0	0	0	0	0	0	0	0	0	5	508	0.027803	508	0.0126685
Syntrophomonas	1430019	9.02404	161	89251	2.40962	1519270	7.77092	2602	0.0958579	36	39812	3.79155	42414	1.1267	2380	0.0947686	27	27886	3.47492	30266	0.913312	147431	8.13557	80	38134	2.46169	185565	5.52067	22958	1.05177	75	42783	2.34152	65741	1.63945
Syntrophothermus	0	0	10	2525	0.0681707	2525	0.0129151	0	0	2	9515	0.906173	9515	0.252759	0	0	0	0	0	0	0	0	0	5	8183	0.528242	8183	0.243449	0	0	0	0	0	0	0
Thermosyntropha	0	0	0	0	0	0	0	0	0	0	0	0	0	0	0	0	0	0	0	0	0	0	0	0	0	0	0	0	0	0	0	0	0	0	0
Anaerovirgula	0	0	0	0	0	0	0	0	0	0	0	0	0	0	0	0	0	0	0	0	0	0	0	0	0	0	0	0	0	0	0	0	0	0	0
Intestinimonas	0	0	0	0	0	0	0	0	0	0	0	0	0	0	0	0	0	0	0	0	0	0	0	0	0	0	0	0	0	0	0	0	0	0	0
Proteiniborus	0	0	0	0	0	0	0	0	0	0	0	0	0	0	0	0	0	0	0	0	0	0	0	0	0	0	0	0	0	0	0	0	0	0	0
unclassified Clostridiales (miscellaneous)	0	0	8	614	0.0165769	614	0.00314055	0	0	0	0	0	0	0	0	0	0	0	0	0	0	0	0	3	347	0.0224001	347	0.0103235	0	0	0	0	0	0	0
Acetohalobium	0	0	0	0	0	0	0	0	0	0	0	0	0	0	0	0	0	0	0	0	0	0	0	0	0	0	0	0	0	0	0	0	0	0	0
Natranaerobius	0	0	0	0	0	0	0	0	0	0	0	0	0	0	0	0	0	0	0	0	0	0	0	0	0	0	0	0	0	0	0	0	0	0	0
Caldanaerobius	0	0	0	0	0	0	0	0	0	0	0	0	0	0	0	0	0	0	0	0	0	0	0	0	0	0	0	0	0	0	0	0	0	0	0
Moorella	0	0	5	1130	0.0305081	1130	0.00577984	0	0	3	803	0.0764747	803	0.0213311	0	0	0	0	0	0	0	0	0	3	436	0.0281454	436	0.0129713	0	0	0	0	0	0	0
Thermacetogenium	0	0	0	0	0	0	0	0	0	0	0	0	0	0	0	0	0	0	0	0	0	0	0	2	209	0.0134917	209	0.00621787	0	0	0	0	0	0	0
Syntrophaceticus	0	0	0	0	0	0	0	0	0	0	0	0	0	0	0	0	0	0	0	0	0	0	0	0	0	0	0	0	0	0	0	0	0	0	0
Thermoanaerobacterium	0	0	0	0	0	0	0	0	0	0	0	0	0	0	0	0	0	0	0	0	0	0	0	2	1137	0.0733975	1137	0.0338264	0	0	0	0	0	0	0
Mahella	0	0	0	0	0	0	0	0	0	2	7113	0.677416	7113	0.188952	0	0	0	0	0	0	0	0	0	0	0	0	0	0	0	0	0	0	0	0	0
unclassified Thermoanaerobacterales	0	0	0	0	0	0	0	0	0	0	0	0	0	0	0	0	0	0	0	0	0	0	0	0	0	0	0	0	0	0	0	0	0	0	0
unclassified Clostridia	0	0	0	0	0	0	0	0	0	0	0	0	0	0	0	0	0	0	0	0	0	0	0	11	777	0.0501582	777	0.0231162	0	0	0	0	0	0	0
environmental samples <clostridial firmicutes>	0	0	0	0	0	0	0	0	0	0	0	0	0	0	0	0	0	0	0	0	0	0	0	0	0	0	0	0	0	0	0	0	0	0	0
Coprobacillus	0	0	0	0	0	0	0	0	0	0	0	0	0	0	0	0	0	0	0	0	0	0	0	0	0	0	0	0	0	0	0	0	0	0	0
Turicibacter	0	0	0	0	0	0	0	0	0	0	0	0	0	0	0	0	0	0	0	0	0	0	0	0	0	0	0	0	0	0	0	0	0	0	0
Limnochorda	0	0	0	0	0	0	0	0	0	0	0	0	0	0	0	0	0	0	0	0	0	0	0	0	0	0	0	0	0	0	0	0	0	0	0
Selenomonadaceae	0	0	0	0	0	0	0	0	0	0	0	0	0	0	0	0	0	0	0	0	0	0	0	2	147	0.00948938	147	0.00437334	0	0	0	0	0	0	0
Sporomusa	0	0	8	1583	0.0427383	1583	0.00809689	0	0	5	17289	1.64654	17289	0.45927	0	0	3	1853	0.230905	1853	0.0559164	0	0	2	1269	0.0819185	1269	0.0377535	0	0	0	0	0	0	0
Megasphaera	0	0	0	0	0	0	0	0	0	2	78	0.00742843	78	0.00207201	0	0	0	0	0	0	0	0	0	0	0	0	0	0	0	0	0	0	0	0	0
Peptoniphilaceae	0	0	0	0	0	0	0	0	0	2	136	0.0129521	136	0.00361274	0	0	0	0	0	0	0	0	0	0	0	0	0	0	0	0	0	0	0	0	0
[Clostridium] ultunense	0	0	0	0	0	0	0	0	0	0	0	0	0	0	0	0	0	0	0	0	0	0	0	2	528	0.0340843	528	0.0157083	0	0	0	0	0	0	0
Sedimentibacter	0	0	105	7598	0.205133	7598	0.038863	0	0	0	0	0	0	0	0	0	0	0	0	0	0	0	0	0	0	0	0	0	0	0	0	0	0	0	0
unclassified Firmicutes sensu stricto (miscellaneous)	0	0	141	30108	0.812864	30108	0.153999	0	0	21	12406	1.1815	12406	0.329556	0	0	23	5839	0.727608	5839	0.176199	0	0	21	9489	0.612549	9489	0.282303	0	0	119	11564	0.632901	11564	0.288383
Acholeplasma	0	0	177	21724	0.586511	21724	0.111116	0	0	0	0	0	0	0	0	0	0	0	0	0	0	0	0	0	0	0	0	0	0	0	18	546	0.0298827	546	0.0136162
unclassified Tenericutes	0	0	23	2735	0.0738403	2735	0.0139893	0	0	0	0	0	0	0	0	0	0	0	0	0	0	0	0	0	0	0	0	0	0	0	0	0	0	0	0
Mesotoga	0	0	201	84200	2.27326	84200	0.430675	0	0	4	197	0.0187615	197	0.00523316	0	0	4	4416	0.550285	4416	0.133258	9237	0.509718	60	116227	7.50287	125464	3.73263	2180	0.0998717	128	21228	1.16181	23408	0.583749
Thermotoga	0	0	0	0	0	0	0	0	0	0	0	0	0	0	0	0	0	0	0	0	0	0	0	0	0	0	0	0	0	0	0	0	0	0	0
unclassified Thermotogales	0	0	6	2225	0.0600712	2225	0.0113807	0	0	0	0	0	0	0	0	0	0	0	0	0	0	0	0	0	0	0	0	0	0	0	0	0	0	0	0
candidate division KSB1	0	0	0	0	0	0	0	0	0	0	0	0	0	0	0	0	0	0	0	0	0	0	0	0	0	0	0	0	0	0	0	0	0	0	0
candidate division SR1	0	0	0	0	0	0	0	0	0	0	0	0	0	0	0	0	0	0	0	0	0	0	0	7	1205	0.0777871	1205	0.0358495	0	0	10	612	0.0334949	612	0.0152621
unclassified Atribacteria	0	0	0	0	0	0	0	0	0	2	1223	0.116474	1223	0.0324881	0	0	0	0	0	0	0	0	0	0	0	0	0	0	0	0	0	0	0	0	0
Candidatus Riflebacteria bacterium HGW-Riflebacteria-1	0	0	0	0	0	0	0	0	0	0	0	0	0	0	0	0	0	0	0	0	0	0	0	0	0	0	0	0	0	0	8	326	0.0178421	326	0.00812979
Candidatus Riflebacteria bacterium HGW-Riflebacteria-2	0	0	0	0	0	0	0	0	0	0	0	0	0	0	0	0	0	0	0	0	0	0	0	0	0	0	0	0	0	0	7	255	0.0139562	255	0.00635919
unclassified Saccharibacteria	0	0	0	0	0	0	0	0	0	0	0	0	0	0	0	0	0	0	0	0	0	0	0	0	0	0	0	0	0	0	0	0	0	0	0
Candidatus Amesbacteria	0	0	0	0	0	0	0	0	0	0	0	0	0	0	0	0	0	0	0	0	0	0	0	0	0	0	0	0	0	0	0	0	0	0	0
Candidatus Levybacteria	0	0	0	0	0	0	0	0	0	2	184	0.0175235	184	0.00488783	0	0	2	291	0.036262	291	0.00878127	0	0	0	0	0	0	0	0	0	0	0	0	0	0
Candidatus Falkowbacteria	0	0	0	0	0	0	0	0	0	0	0	0	0	0	0	0	0	0	0	0	0	0	0	0	0	0	0	0	0	0	0	0	0	0	0
Candidatus Nealsonbacteria	0	0	10	3047	0.0822638	3047	0.0155851	0	0	0	0	0	0	0	0	0	3	559	0.0696579	559	0.0168685	0	0	0	0	0	0	0	0	0	0	0	0	0	0
unclassified Parcubacteria	0	0	84	117308	3.16711	117308	0.600019	0	0	62	52097	4.96152	52097	1.38392	0	0	77	38373	4.78172	38373	1.15795	0	0	5	393	0.0253696	393	0.011692	0	0	9	564	0.0308679	564	0.014065
Candidatus Wolfebacteria	0	0	0	0	0	0	0	0	0	2	148	0.014095	148	0.00393151	0	0	2	107	0.0133334	107	0.00322885	0	0	0	0	0	0	0	0	0	6	310	0.0169664	310	0.00773078
bacterium BMS3Abin08	0	0	0	0	0	0	0	0	0	0	0	0	0	0	0	0	0	0	0	0	0	0	0	0	0	0	0	0	0	0	0	0	0	0	0
bacterium MS4	0	0	0	0	0	0	0	0	0	0	0	0	0	0	0	0	0	0	0	0	0	0	0	2	237	0.0152992	237	0.00705089	0	0	0	0	0	0	0
bacterium SM23_57	0	0	0	0	0	0	0	0	0	0	0	0	0	0	0	0	0	0	0	0	0	0	0	0	0	0	0	0	0	0	0	0	0	0	0
environmental samples <Archaea>	0	0	0	0	0	0	0	0	0	4	2664	0.253709	2664	0.0707672	0	0	0	0	0	0	0	0	0	2	188	0.0121361	188	0.00559311	0	0	0	0	0	0	0
unclassified Methanomassiliicoccales	0	0	0	0	0	0	0	0	0	0	0	0	0	0	0	0	0	0	0	0	0	0	0	3	3175	0.204958	3175	0.0944581	0	0	0	0	0	0	0
unclassified Thermoplasmatales (miscellaneous)	0	0	5	10250	0.276732	10250	0.0524277	0	0	2	789	0.0751414	789	0.0209592	0	0	3	817	0.101808	817	0.0246539	0	0	0	0	0	0	0	0	0	0	0	0	0	0
Methanobacterium	0	0	0	0	0	0	0	0	0	0	0	0	0	0	0	0	0	0	0	0	0	0	0	0	0	0	0	0	0	0	5	1286	0.0703831	1286	0.0320703
Methanococcales	0	0	0	0	0	0	0	0	0	0	0	0	0	0	0	0	0	0	0	0	0	0	0	0	0	0	0	0	0	0	0	0	0	0	0
Halostagnicola	0	0	0	0	0	0	0	0	0	0	0	0	0	0	0	0	0	0	0	0	0	0	0	0	0	0	0	0	0	0	0	0	0	0	0
Methanocella	0	0	0	0	0	0	0	0	0	2	2826	0.269138	2826	0.0750706	0	0	2	3257	0.40586	3257	0.0982838	0	0	3	3794	0.244916	3794	0.112874	0	0	5	5369	0.293847	5369	0.133892
Methanocalculus	0	0	7	2344	0.063284	2344	0.0119893	0	0	3	4989	0.475134	4989	0.132529	0	0	2	6497	0.809602	6497	0.196055	0	0	4	18009	1.16255	18009	0.535779	0	0	9	30782	1.68471	30782	0.767642
Methanoculleus	295326	1.86363	607	966171	26.085	1261497	6.45243	66272	2.44147	244	131470	12.5207	197742	5.25287	77707	3.0942	256	170097	21.1961	247804	7.47778	156352	8.62785	301	520455	33.5973	676807	20.1354	131148	6.00824	395	517517	28.3238	648665	16.1764
Methanofollis	0	0	14	120092	3.24228	120092	0.614259	0	0	0	0	0	0	0	0	0	4	6235	0.776954	6235	0.188148	0	0	6	17721	1.14395	17721	0.52721	0	0	15	18264	0.999593	18264	0.455468
Methanolacinia	0	0	7	16677	0.45025	16677	0.0853012	0	0	4	3034	0.288947	3034	0.080596	0	0	3	3211	0.400128	3211	0.0968957	0	0	6	8108	0.523401	8108	0.241218	0	0	13	13615	0.745152	13615	0.339531
Methanomicrobium	0	0	0	0	0	0	0	0	0	0	0	0	0	0	0	0	0	0	0	0	0	0	0	0	0	0	0	0	0	0	0	0	0	0	0
Methanoplanus	0	0	6	3271	0.0883114	3271	0.0167308	0	0	0	0	0	0	0	0	0	0	0	0	0	0	0	0	2	1105	0.0713317	1105	0.0328744	0	0	6	4496	0.246067	4496	0.112121
Methanoregula	0	0	5	2086	0.0563184	2086	0.0106697	0	0	2	218	0.0207615	218	0.00579101	0	0	0	0	0	0	0	0	0	2	1453	0.0937964	1453	0.0432276	0	0	12	10599	0.580086	10599	0.264318
Methanospirillum	13365	0.0843389	273	39282	1.06055	52647	0.269284	2124	0.0782483	7	5749	0.547513	7873	0.20914	2994	0.119217	11	3105	0.386919	6099	0.184044	0	0	3	8502	0.548835	8502	0.25294	13302	0.6094	431	55203	3.02127	68505	1.70838
unclassified Methanomicrobiales	13741	0.0867116	77	110767	2.99052	124508	0.636846	3555	0.130966	49	22169	2.11129	25724	0.683339	3927	0.156368	48	36599	4.56066	40526	1.22292	6481	0.357636	33	73355	4.73533	79836	2.37517	4837	0.221596	64	83861	4.58973	88698	2.21195
Methanothrix	14048454	88.6518	53	668388	18.0453	14716842	75.2752	2581798	95.1136	59	186896	17.7993	2768694	73.5483	2394221	95.3349	33	104259	12.9919	2498480	75.3946	1315729	72.6049	24	49409	3.18953	1365138	40.6137	871444	39.9232	57	66814	3.65675	938258	23.3983
Methanococcoides	0	0	5	2446	0.0660378	2446	0.012511	0	0	2	69	0.0065713	69	0.00183293	0	0	0	0	0	0	0	0	0	0	0	0	0	0	0	0	0	0	0	0	0
Methanosarcina	0	0	39	147559	3.98384	147559	0.75475	44723	1.6476	22	15497	1.47588	60220	1.5997	0	0	26	33802	4.21212	33802	1.02001	13049	0.720073	28	79241	5.11529	92290	2.74568	1110074	50.8555	134	162916	8.91643	1272990	31.7458
Candidatus Syntrophoarchaeum	0	0	0	0	0	0	0	0	0	0	0	0	0	0	0	0	0	0	0	0	0	0	0	0	0	0	0	0	0	0	0	0	0	0	0
unclassified Methanomicrobia	0	0	0	0	0	0	0	0	0	0	0	0	0	0	0	0	0	0	0	0	0	0	0	0	0	0	0	0	0	0	0	0	0	0	0
unclassified Candidatus Altiarchaeales	0	0	0	0	0	0	0	0	0	0	0	0	0	0	0	0	2	73	0.00909665	73	0.00220286	0	0	0	0	0	0	0	0	0	0	0	0	0	0
Pezizomycotina	0	0	0	0	0	0	0	0	0	0	0	0	0	0	1649	0.0656611	0	0	0	1649	0.0497605	0	0	0	0	0	0	0	0	0	0	0	0	0	0
Arthropoda	0	0	0	0	0	0	0	0	0	0	0	0	0	0	0	0	0	0	0	0	0	0	0	2	228	0.0147182	228	0.00678314	0	0	0	0	0	0	0
Medicago	0	0	0	0	0	0	0	0	0	2	21872	2.08301	21872	0.581014	0	0	0	0	0	0	0	0	0	0	0	0	0	0	0	0	0	0	0	0	0
Poaceae	0	0	0	0	0	0	0	0	0	0	0	0	0	0	0	0	0	0	0	0	0	0	0	0	0	0	0	0	0	0	0	0	0	0	0
environmental samples <viruses>	0	0	0	0	0	0	0	0	0	2	165	0.015714	165	0.0043831	0	0	3	2147	0.267541	2147	0.0647882	0	0	0	0	0	0	0	0	0	0	0	0	0	0
unclassified archaeal viruses	0	0	0	0	0	0	0	0	0	0	0	0	0	0	0	0	0	0	0	0	0	0	0	0	0	0	0	0	0	0	0	0	0	0	0
Not assigned	1294	0.0081657	301	95918	2.58962	97212	0.49723	200	0.00736802	10	720	0.0685701	920	0.0244391	184	0.00732665	12	953	0.118755	1137	0.0343103	848	0.0467945	91	193295	12.4779	194143	5.77587	209	0.00957485	233	12529	0.685715	12738	0.31766
sum	15846779	100	3789	3703939	100	19550718	100	2714435	100	1989	1050020	100	3764455	100	2511380	100	1908	802493	100	3313873	100	1812177	100	2038	1549100	100	3361277	100	2182801	100	3703	1827143	100	4009944	100
all leaves/species	expected read counts	relative abundance	unexpected contig counts	unexpected read counts	relative abundance	total read counts	total relative abundance	expected read counts	relative abundance	unexpected contig counts	unexpected read counts	relative abundance	total read counts	total relative abundance	expected read counts	relative abundance	unexpected contig counts	unexpected read counts	relative abundance	total read counts	total relative abundance	expected read counts	relative abundance	unexpected contig counts	unexpected read counts	relative abundance	total read counts	total relative abundance	expected read counts	relative abundance	unexpected contig counts	unexpected read counts	relative abundance	total read counts	total relative abundance
Acidobacteria	0	0	4	9105	0.54436	9105	0.0589945	0	0	2	1404	0.249578	1404	0.0488865	0	0	2	1510	0.388976	1510	0.059487	0	0	2	645	0.0778687	645	0.0275253	0	0	0	0	0	0	0
Caldisericum exile	0	0	0	0	0	0	0	0	0	0	0	0	0	0	0	0	0	0	0	0	0	0	0	0	0	0	0	0	0	0	0	0	0	0	0
Elusimicrobium	0	0	0	0	0	0	0	0	0	2	7641	1.35828	7641	0.266055	0	0	0	0	0	0	0	0	0	0	0	0	0	0	0	0	0	0	0	0	0
Candidatus Endomicrobium trichonymphae	0	0	0	0	0	0	0	0	0	0	0	0	0	0	0	0	3	248	0.0638848	248	0.00977005	0	0	0	0	0	0	0	0	0	0	0	0	0	0
Endomicrobium proavitum	0	0	46	32368	1.93518	32368	0.209724	0	0	46	64508	11.4671	64508	2.24613	0	0	76	5320	1.37043	5320	0.209583	0	0	0	0	0	0	0	0	0	53	30827	3.67361	30827	1.55619
unclassified Elusimicrobia	0	0	11	15668	0.936742	15668	0.101518	0	0	14	41501	7.3773	41501	1.44504	0	0	19	2076	0.534777	2076	0.0817848	0	0	0	0	0	0	0	0	0	16	7415	0.883635	7415	0.37432
uncultured bacterium	0	0	0	0	0	0	0	0	0	3	183	0.0325304	183	0.00637196	0	0	0	0	0	0	0	0	0	2	674	0.0813698	674	0.0287629	0	0	0	0	0	0	0
uncultured bacterium pBIO2079	0	0	0	0	0	0	0	0	0	0	0	0	0	0	0	0	0	0	0	0	0	0	0	0	0	0	0	0	0	0	0	0	0	0	0
Bacteroides fragilis	0	0	0	0	0	0	0	0	0	0	0	0	0	0	0	0	0	0	0	0	0	0	0	0	0	0	0	0	0	0	0	0	0	0	0
Bacteroides pyogenes	0	0	0	0	0	0	0	0	0	0	0	0	0	0	0	0	0	0	0	0	0	0	0	0	0	0	0	0	0	0	0	0	0	0	0
Bacteroides sp. SM23_62	0	0	0	0	0	0	0	0	0	0	0	0	0	0	0	0	0	0	0	0	0	0	0	0	0	0	0	0	0	0	0	0	0	0	0
Candidatus Bacteroides periocalifornicus	0	0	0	0	0	0	0	0	0	0	0	0	0	0	0	0	0	0	0	0	0	0	0	0	0	0	0	0	0	0	0	0	0	0	0
Lentimicrobium saccharophilum	0	0	0	0	0	0	0	0	0	4	1267	0.225224	1267	0.0441162	0	0	3	4697	1.20995	4697	0.18504	0	0	3	1077	0.130023	1077	0.0459609	0	0	4	3019	0.35977	3019	0.152403
Odoribacter	0	0	0	0	0	0	0	0	0	0	0	0	0	0	0	0	0	0	0	0	0	0	0	0	0	0	0	0	0	0	0	0	0	0	0
Paludibacter jiangxiensis	0	0	0	0	0	0	0	0	0	0	0	0	0	0	0	0	0	0	0	0	0	0	0	0	0	0	0	0	0	0	0	0	0	0	0
Porphyromonas	0	0	0	0	0	0	0	0	0	2	110	0.0195538	110	0.00383014	0	0	0	0	0	0	0	0	0	0	0	0	0	0	0	0	11	1038	0.123697	1038	0.0523997
Porphyromonadaceae bacterium H1	0	0	0	0	0	0	0	0	0	3	108	0.0191983	108	0.0037605	0	0	0	0	0	0	0	0	0	0	0	0	0	0	0	0	0	0	0	0	0
Prevotella sp. CAG:1092	0	0	0	0	0	0	0	0	0	2	140	0.0248867	140	0.00487472	0	0	0	0	0	0	0	0	0	0	0	0	0	0	0	0	0	0	0	0	0
Prevotella ruminicola	0	0	0	0	0	0	0	0	0	0	0	0	0	0	0	0	0	0	0	0	0	0	0	0	0	0	0	0	0	0	0	0	0	0	0
Alistipes sp. ZOR0009	0	0	0	0	0	0	0	0	0	0	0	0	0	0	0	0	0	0	0	0	0	0	0	0	0	0	0	0	0	0	0	0	0	0	0
Mucinivorans hirudinis	0	0	0	0	0	0	0	0	0	0	0	0	0	0	0	0	0	0	0	0	0	0	0	0	0	0	0	0	0	0	0	0	0	0	0
Bacteroidales bacterium 36-12	0	0	0	0	0	0	0	0	0	2	942	0.167452	942	0.0327999	0	0	0	0	0	0	0	0	0	0	0	0	0	0	0	0	0	0	0	0	0
Bacteroidales bacterium 6E	0	0	0	0	0	0	0	0	0	2	372	0.0661275	372	0.0129528	0	0	2	690	0.177744	690	0.0271828	0	0	0	0	0	0	0	0	0	0	0	0	0	0
Williamwhitmania taraxaci	0	0	17	1126	0.0673201	1126	0.00729575	0	0	17	3523	0.626255	3523	0.122669	0	0	4	6078	1.56569	6078	0.239445	0	0	0	0	0	0	0	0	0	4	514	0.0612527	514	0.0259474
Marinifilaceae	0	0	0	0	0	0	0	0	0	0	0	0	0	0	0	0	0	0	0	0	0	0	0	0	0	0	0	0	0	0	0	0	0	0	0
Alkaliflexus imshenetskii	0	0	0	0	0	0	0	0	0	2	344	0.0611501	344	0.0119779	0	0	0	0	0	0	0	0	0	0	0	0	0	0	0	0	0	0	0	0	0
Alkalitalea saponilacus	0	0	0	0	0	0	0	0	0	3	234	0.0415963	234	0.00814775	0	0	0	0	0	0	0	0	0	0	0	0	0	0	0	0	0	0	0	0	0
Marinilabilia	0	0	0	0	0	0	0	0	0	0	0	0	0	0	0	0	0	0	0	0	0	0	0	0	0	0	0	0	0	0	5	227	0.0270513	227	0.0114593
Saccharicrinis fermentans	0	0	0	0	0	0	0	0	0	2	514	0.0913697	514	0.0178972	0	0	0	0	0	0	0	0	0	0	0	0	0	0	0	0	0	0	0	0	0
Draconibacterium	0	0	0	0	0	0	0	0	0	0	0	0	0	0	0	0	0	0	0	0	0	0	0	0	0	0	0	0	0	0	0	0	0	0	0
Salinivirga cyanobacteriivorans	0	0	0	0	0	0	0	0	0	0	0	0	0	0	0	0	0	0	0	0	0	0	0	0	0	0	0	0	0	0	15	1289	0.153608	1289	0.0650705
Salinivirgaceae bacterium	0	0	0	0	0	0	0	0	0	3	375	0.0666607	375	0.0130573	0	0	2	1146	0.295209	1146	0.0451471	0	0	0	0	0	0	0	0	0	8	1130	0.134661	1130	0.057044
Marinilabiliales bacterium	0	0	0	0	0	0	0	0	0	5	546	0.097058	546	0.0190114	0	0	0	0	0	0	0	0	0	3	616	0.0743677	616	0.0262878	0	0	7	1508	0.179706	1508	0.0761259
Bacteroidia bacterium 43-41	0	0	0	0	0	0	0	0	0	2	377	0.0670163	377	0.0131269	0	0	0	0	0	0	0	0	0	2	751	0.0906658	751	0.0320489	0	0	0	0	0	0	0
Hydrotalea flava	0	0	0	0	0	0	0	0	0	0	0	0	0	0	0	0	0	0	0	0	0	0	0	0	0	0	0	0	0	0	0	0	0	0	0
Cecembia lonarensis	0	0	0	0	0	0	0	0	0	0	0	0	0	0	0	0	2	182	0.0468832	182	0.00716996	0	0	0	0	0	0	0	0	0	0	0	0	0	0
Cytophagaceae	0	0	0	0	0	0	0	0	0	3	483	0.085859	483	0.0168178	0	0	0	0	0	0	0	0	0	0	0	0	0	0	0	0	0	0	0	0	0
Pontibacter	0	0	0	0	0	0	0	0	0	0	0	0	0	0	0	0	0	0	0	0	0	0	0	0	0	0	0	0	0	0	0	0	0	0	0
Flavobacterium	0	0	0	0	0	0	0	0	0	5	1005	0.178651	1005	0.0349935	0	0	2	392	0.100979	392	0.015443	0	0	0	0	0	0	0	0	0	0	0	0	0	0
Flavobacteriales bacterium CG18_big_fil_WC_8_21_14_2_50_32_9	0	0	0	0	0	0	0	0	0	0	0	0	0	0	0	0	0	0	0	0	0	0	0	0	0	0	0	0	0	0	0	0	0	0	0
Saprospirales	0	0	0	0	0	0	0	0	0	0	0	0	0	0	0	0	2	180	0.046368	180	0.00709116	0	0	0	0	0	0	0	0	0	0	0	0	0	0
Pedobacter	0	0	0	0	0	0	0	0	0	0	0	0	0	0	0	0	0	0	0	0	0	0	0	0	0	0	0	0	0	0	0	0	0	0	0
Sphingobacterium sp. ML3W	0	0	0	0	0	0	0	0	0	0	0	0	0	0	0	0	0	0	0	0	0	0	0	0	0	0	0	0	0	0	0	0	0	0	0
Bacteroidetes bacterium	0	0	0	0	0	0	0	0	0	4	333	0.0591947	333	0.0115949	0	0	0	0	0	0	0	0	0	0	0	0	0	0	0	0	4	336	0.0400407	336	0.0169617
Bacteroidetes bacterium 38_7	0	0	0	0	0	0	0	0	0	0	0	0	0	0	0	0	0	0	0	0	0	0	0	3	165	0.0199199	165	0.00704137	0	0	0	0	0	0	0
Bacteroidetes bacterium 4484_249	0	0	0	0	0	0	0	0	0	12	3010	0.535064	3010	0.104807	0	0	9	6258	1.61206	6258	0.246536	0	0	17	5094	0.614982	5094	0.217386	0	0	7	6940	0.82703	6940	0.350341
Bacteroidetes bacterium 4484_276	0	0	0	0	0	0	0	0	0	49	7165	1.27366	7165	0.249481	0	0	31	19949	5.13886	19949	0.785898	0	0	67	8971	1.08304	8971	0.382837	0	0	27	14246	1.69768	14246	0.719158
Bacteroidetes bacterium 4572_114	0	0	4	51256	3.06444	51256	0.332106	0	0	40	10490	1.86472	10490	0.365256	0	0	29	26280	6.76972	26280	1.03531	0	0	48	10521	1.27017	10521	0.448983	0	0	24	17834	2.12525	17834	0.900285
Bacteroidetes bacterium 4572_77	0	0	0	0	0	0	0	0	0	0	0	0	0	0	0	0	0	0	0	0	0	0	0	0	0	0	0	0	0	0	0	0	0	0	0
Bacteroidetes bacterium CG2_30_32_10	0	0	0	0	0	0	0	0	0	0	0	0	0	0	0	0	0	0	0	0	0	0	0	0	0	0	0	0	0	0	0	0	0	0	0
Bacteroidetes bacterium GWA2_31_9b	0	0	0	0	0	0	0	0	0	3	307	0.0545729	307	0.0106896	0	0	0	0	0	0	0	0	0	0	0	0	0	0	0	0	0	0	0	0	0
Bacteroidetes bacterium GWA2_32_17	0	0	0	0	0	0	0	0	0	0	0	0	0	0	0	0	0	0	0	0	0	0	0	0	0	0	0	0	0	0	0	0	0	0	0
Bacteroidetes bacterium HGW-Bacteroidetes-1	0	0	7	124952	7.4705	124952	0.809608	0	0	13	2838	0.504488	2838	0.0988176	0	0	5	4023	1.03632	4023	0.158488	0	0	16	2234	0.269704	2234	0.0953358	0	0	4	3929	0.468214	3929	0.198341
Bacteroidetes bacterium HGW-Bacteroidetes-10	0	0	0	0	0	0	0	0	0	0	0	0	0	0	0	0	0	0	0	0	0	0	0	0	0	0	0	0	0	0	0	0	0	0	0
Bacteroidetes bacterium HGW-Bacteroidetes-11	0	0	0	0	0	0	0	0	0	4	813	0.14452	813	0.0283082	0	0	2	634	0.163318	634	0.0249767	0	0	3	906	0.109378	906	0.0386635	0	0	0	0	0	0	0
Bacteroidetes bacterium HGW-Bacteroidetes-12	0	0	0	0	0	0	0	0	0	0	0	0	0	0	0	0	2	376	0.0968575	376	0.0148127	0	0	0	0	0	0	0	0	0	0	0	0	0	0
Bacteroidetes bacterium HGW-Bacteroidetes-15	0	0	71	4820	0.288173	4820	0.0312305	0	0	112	17622	3.13252	17622	0.613588	0	0	43	39864	10.269	39864	1.57046	0	0	0	0	0	0	0	0	0	0	0	0	0	0
Bacteroidetes bacterium HGW-Bacteroidetes-21	0	0	0	0	0	0	0	0	0	2	733	0.1303	733	0.0255227	0	0	0	0	0	0	0	0	0	0	0	0	0	0	0	0	0	0	0	0	0
Bacteroidetes bacterium HGW-Bacteroidetes-4	0	0	0	0	0	0	0	0	0	4	626	0.111279	626	0.021797	0	0	2	659	0.169758	659	0.0259615	0	0	0	0	0	0	0	0	0	0	0	0	0	0
Bacteroidetes bacterium RBG_13_42_15	0	0	0	0	0	0	0	0	0	0	0	0	0	0	0	0	3	258	0.0664608	258	0.010164	0	0	0	0	0	0	0	0	0	9	871	0.103796	871	0.0439693
Bacteroidetes bacterium RBG_13_43_22	0	0	0	0	0	0	0	0	0	0	0	0	0	0	0	0	0	0	0	0	0	0	0	0	0	0	0	0	0	0	5	498	0.059346	498	0.0251397
Bacteroidetes bacterium RBG_19FT_COMBO_42_10	0	0	0	0	0	0	0	0	0	0	0	0	0	0	0	0	0	0	0	0	0	0	0	0	0	0	0	0	0	0	0	0	0	0	0
Prosthecochloris sp. CIB 2401	0	0	0	0	0	0	0	0	0	0	0	0	0	0	0	0	2	106	0.0273056	106	0.00417591	0	0	0	0	0	0	0	0	0	0	0	0	0	0
unclassified Ignavibacteria	0	0	0	0	0	0	0	0	0	0	0	0	0	0	0	0	3	304	0.0783104	304	0.0119762	0	0	0	0	0	0	0	0	0	0	0	0	0	0
Candidatus Cloacimonas acidaminovorans	0	0	147	43553	2.6039	43553	0.282195	0	0	20	1336	0.23749	1336	0.0465188	0	0	15	1573	0.405205	1573	0.0619689	141070	9.31169	148	10526	1.27077	151596	6.46935	8466	0.741473	16	22073	2.63041	30539	1.54165
Candidatus Cloacimonas sp. 4484_209	0	0	0	0	0	0	0	0	0	0	0	0	0	0	0	0	3	1692	0.435859	1692	0.0666569	0	0	2	5473	0.660737	5473	0.23356	0	0	0	0	0	0	0
Candidatus Cloacimonetes bacterium 4572_55	0	0	0	0	0	0	0	0	0	0	0	0	0	0	0	0	0	0	0	0	0	0	0	0	0	0	0	0	0	0	0	0	0	0	0
Candidatus Cloacimonetes bacterium HGW-Cloacimonetes-1	0	0	16	17588	1.05153	17588	0.113959	0	0	15	1315	0.233757	1315	0.0457876	0	0	17	1439	0.370686	1439	0.0566899	0	0	6	1292	0.155979	1292	0.055136	0	0	10	14077	1.67754	14077	0.710627
Candidatus Cloacimonetes bacterium HGW-Cloacimonetes-2	0	0	15	23572	1.4093	23572	0.152731	0	0	21	1667	0.296329	1667	0.058044	0	0	19	1358	0.349821	1358	0.0534989	0	0	8	1579	0.190628	1579	0.0673837	0	0	8	8303	0.989457	8303	0.419147
Candidatus Cloacimonetes bacterium HGW-Cloacimonetes-3	0	0	14	1805	0.107915	1805	0.0116952	0	0	10	880	0.156431	880	0.0306411	0	0	6	279	0.0718704	279	0.0109913	0	0	15	3770	0.45514	3770	0.160885	0	0	0	0	0	0	0
unclassified Candidatus Tectomicrobia	0	0	0	0	0	0	0	0	0	0	0	0	0	0	0	0	0	0	0	0	0	0	0	0	0	0	0	0	0	0	0	0	0	0	0
Candidatus Sulfobium mesophilum	0	0	0	0	0	0	0	0	0	0	0	0	0	0	0	0	2	196	0.0504896	196	0.00772149	0	0	0	0	0	0	0	0	0	0	0	0	0	0
unclassified Nitrospirae	0	0	6	4384	0.262106	4384	0.0284055	0	0	3	1057	0.187894	1057	0.0368042	0	0	2	748	0.192685	748	0.0294677	0	0	0	0	0	0	0	0	0	0	0	0	0	0
Rhizobiales	0	0	0	0	0	0	0	0	0	2	90	0.0159986	90	0.00313375	0	0	0	0	0	0	0	0	0	4	1074	0.129661	1074	0.0458329	0	0	8	3580	0.426624	3580	0.180723
Sphingomonadales	0	0	0	0	0	0	0	0	0	0	0	0	0	0	0	0	0	0	0	0	0	0	0	0	0	0	0	0	0	0	0	0	0	0	0
Burkholderiaceae	0	0	7	1169	0.069891	1169	0.00757436	0	0	0	0	0	0	0	0	0	2	112	0.0288512	112	0.00441228	0	0	0	0	0	0	0	0	0	0	0	0	0	0
Brachymonas denitrificans	0	0	4	208	0.0124357	208	0.0013477	0	0	0	0	0	0	0	4892	0.227517	18	796	0.205049	5688	0.224081	0	0	0	0	0	0	0	0	0	0	0	0	0	0
Comamonas	0	0	5	320	0.0191318	320	0.00207339	0	0	0	0	0	0	0	0	0	2	54	0.0139104	54	0.00212735	0	0	0	0	0	0	0	0	0	6	259	0.0308647	259	0.0130747
Variovorax	0	0	0	0	0	0	0	0	0	0	0	0	0	0	0	0	2	59	0.0151984	59	0.00232433	0	0	0	0	0	0	0	0	0	0	0	0	0	0
Thauera	0	0	0	0	0	0	0	0	0	0	0	0	0	0	0	0	0	0	0	0	0	0	0	0	0	0	0	0	0	0	4	230	0.0274088	230	0.0116107
unclassified Betaproteobacteria (miscellaneous)	0	0	0	0	0	0	0	0	0	0	0	0	0	0	0	0	0	0	0	0	0	0	0	0	0	0	0	0	0	0	5	176	0.0209737	176	0.00888472
Candidatus Magnetomorum sp. HK-1	0	0	0	0	0	0	0	0	0	0	0	0	0	0	0	0	0	0	0	0	0	0	0	0	0	0	0	0	0	0	0	0	0	0	0
Desulfatibacillum	0	0	0	0	0	0	0	0	0	3	920	0.163541	920	0.0320339	0	0	2	7152	1.84235	7152	0.281756	0	0	0	0	0	0	0	0	0	4	8146	0.970748	8146	0.411221
Desulfatiglans anilini	0	0	0	0	0	0	0	0	0	0	0	0	0	0	0	0	0	0	0	0	0	0	0	2	174	0.0210065	174	0.00742544	0	0	0	0	0	0	0
Desulfococcus multivorans	0	0	0	0	0	0	0	0	0	0	0	0	0	0	0	0	2	433	0.111541	433	0.0170582	0	0	0	0	0	0	0	0	0	0	0	0	0	0
Desulfotignum	0	0	0	0	0	0	0	0	0	0	0	0	0	0	0	0	0	0	0	0	0	0	0	0	0	0	0	0	0	0	0	0	0	0	0
Desulfobacteraceae bacterium	0	0	0	0	0	0	0	0	0	0	0	0	0	0	0	0	2	106	0.0273056	106	0.00417591	0	0	0	0	0	0	0	0	0	0	0	0	0	0
Desulfobulbus propionicus	0	0	0	0	0	0	0	0	0	3	223	0.0396409	223	0.00776474	0	0	0	0	0	0	0	0	0	3	807	0.0974265	807	0.0344387	0	0	0	0	0	0	0
Desulfobacterales bacterium S5133MH4	0	0	0	0	0	0	0	0	0	0	0	0	0	0	0	0	0	0	0	0	0	0	0	0	0	0	0	0	0	0	0	0	0	0	0
Desulfonauticus sp. 38_4375	0	0	0	0	0	0	0	0	0	2	6249	1.11083	6249	0.217587	0	0	0	0	0	0	0	0	0	0	0	0	0	0	0	0	0	0	0	0	0
Desulfovibrio aminophilus	13753	0.0999416	0	0	0	13753	0.0891105	1787	0.0773791	0	0	0	1787	0.0622224	2372	0.110317	0	0	0	2372	0.0934458	16730	1.10431	0	0	0	16730	0.713952	6585	0.576731	0	0	0	6585	0.33242
Pseudodesulfovibrio profundus	0	0	0	0	0	0	0	0	0	0	0	0	0	0	0	0	0	0	0	0	0	0	0	0	0	0	0	0	0	0	0	0	0	0	0
Desulfuromonas sp. TF	0	0	0	0	0	0	0	0	0	0	0	0	0	0	0	0	0	0	0	0	0	0	0	2	866	0.104549	866	0.0369565	0	0	0	0	0	0	0
Geobacter sp. DSM 2909	0	0	0	0	0	0	0	0	0	2	98	0.0174207	98	0.00341231	0	0	2	60	0.015456	60	0.00236372	0	0	7	951	0.114811	951	0.0405839	0	0	5	417	0.0496933	417	0.0210507
Cystobacterineae	0	0	0	0	0	0	0	0	0	0	0	0	0	0	0	0	0	0	0	0	0	0	0	0	0	0	0	0	0	0	0	0	0	0	0
Desulfobacca acetoxidans	0	0	0	0	0	0	0	0	0	2	68	0.0120878	68	0.00236772	0	0	0	0	0	0	0	0	0	2	157	0.0189541	157	0.00669997	0	0	0	0	0	0	0
Desulfomonile tiedjei	0	0	0	0	0	0	0	0	0	4	331	0.0588392	331	0.0115252	0	0	0	0	0	0	0	0	0	6	595	0.0718324	595	0.0253916	0	0	0	0	0	0	0
Smithella sp. SC_K08D17	0	0	0	0	0	0	0	0	0	0	0	0	0	0	0	0	0	0	0	0	0	0	0	2	153	0.0184712	153	0.00652927	0	0	0	0	0	0	0
Smithella sp. SCADC	0	0	0	0	0	0	0	0	0	2	1010	0.17954	1010	0.0351676	0	0	2	807	0.207883	807	0.0317921	0	0	0	0	0	0	0	0	0	0	0	0	0	0
Syntrophus aciditrophicus	0	0	0	0	0	0	0	0	0	0	0	0	0	0	0	0	0	0	0	0	0	0	0	0	0	0	0	0	0	0	0	0	0	0	0
Desulfacinum infernum	0	0	0	0	0	0	0	0	0	4	185	0.032886	185	0.0064416	0	0	4	488	0.125709	488	0.0192249	0	0	2	160	0.0193163	160	0.00682799	0	0	0	0	0	0	0
Syntrophobacter fumaroxidans	0	0	181	64670	3.86642	64670	0.41902	0	0	229	19986	3.55275	19986	0.695902	0	0	194	19907	5.12804	19907	0.784243	0	0	209	35481	4.2835	35481	1.51415	0	0	190	44537	5.30741	44537	2.24829
Syntrophobacter sp. SbD1	0	0	0	0	0	0	0	0	0	3	308	0.0547507	308	0.0107244	0	0	7	553	0.142453	553	0.0217856	0	0	3	551	0.0665204	551	0.0235139	0	0	0	0	0	0	0
Syntrophobacteraceae bacterium CG2_30_61_12	0	0	0	0	0	0	0	0	0	4	327	0.0581282	327	0.011386	0	0	4	267	0.0687792	267	0.0105186	0	0	6	622	0.075092	622	0.0265438	0	0	0	0	0	0	0
Syntrophorhabdus aromaticivorans	0	0	0	0	0	0	0	0	0	0	0	0	0	0	0	0	0	0	0	0	0	0	0	2	240	0.0289744	240	0.010242	0	0	0	0	0	0	0
Syntrophobacterales bacterium RBG_19FT_COMBO_59_10	0	0	0	0	0	0	0	0	0	0	0	0	0	0	0	0	0	0	0	0	0	0	0	0	0	0	0	0	0	0	0	0	0	0	0
SAR324 cluster bacterium	0	0	0	0	0	0	0	0	0	0	0	0	0	0	0	0	0	0	0	0	0	0	0	0	0	0	0	0	0	0	0	0	0	0	0
Deltaproteobacteria bacterium CG_4_8_14_3_um_filter_45_9	0	0	0	0	0	0	0	0	0	3	12978	2.30699	12978	0.451887	0	0	0	0	0	0	0	0	0	0	0	0	0	0	0	0	0	0	0	0	0
Deltaproteobacteria bacterium RBG_13_49_15	0	0	0	0	0	0	0	0	0	0	0	0	0	0	0	0	2	143	0.0368368	143	0.00563354	0	0	0	0	0	0	0	0	0	0	0	0	0	0
Deltaproteobacteria bacterium RBG_13_53_10	0	0	0	0	0	0	0	0	0	0	0	0	0	0	0	0	0	0	0	0	0	0	0	0	0	0	0	0	0	0	0	0	0	0	0
Arcobacter	9992	0.0726108	0	0	0	9992	0.0647417	0	0	0	0	0	0	0	3264	0.151802	0	0	0	3264	0.128586	0	0	0	0	0	0	0	0	0	0	0	0	0	0
Campylobacter	0	0	0	0	0	0	0	0	0	0	0	0	0	0	0	0	6	594	0.153014	594	0.0234008	0	0	0	0	0	0	0	0	0	0	0	0	0	0
Moritella viscosa	0	0	0	0	0	0	0	0	0	0	0	0	0	0	0	0	0	0	0	0	0	1817	0.119936	0	0	0	1817	0.0775404	0	0	0	0	0	0	0
Chromatiaceae	0	0	0	0	0	0	0	0	0	0	0	0	0	0	0	0	3	131	0.0337456	131	0.00516079	0	0	0	0	0	0	0	0	0	0	0	0	0	0
Salmonella enterica	0	0	0	0	0	0	0	0	0	0	0	0	0	0	1851	0.0860862	0	0	0	1851	0.0729208	2384	0.157362	0	0	0	2384	0.101737	0	0	0	0	0	0	0
Methylosarcina fibrata	0	0	0	0	0	0	0	0	0	0	0	0	0	0	0	0	2	93	0.0239568	93	0.00366377	0	0	0	0	0	0	0	0	0	0	0	0	0	0
Nitrincola nitratireducens	0	0	0	0	0	0	0	0	0	0	0	0	0	0	0	0	0	0	0	0	0	0	0	0	0	0	0	0	0	0	0	0	0	0	0
Pseudomonas savastanoi	0	0	0	0	0	0	0	0	0	0	0	0	0	0	0	0	0	0	0	0	0	0	0	0	0	0	0	0	0	0	0	0	0	0	0
Solemya velum gill symbiont	0	0	0	0	0	0	0	0	0	0	0	0	0	0	0	0	0	0	0	0	0	0	0	0	0	0	0	0	0	0	0	0	0	0	0
Vibrio	0	0	0	0	0	0	0	0	0	2	125	0.0222202	125	0.00435243	0	0	0	0	0	0	0	0	0	0	0	0	0	0	0	0	0	0	0	0	0
Xanthomonas campestris	0	0	5	518	0.0309697	518	0.0033563	0	0	0	0	0	0	0	0	0	3	549	0.141422	549	0.0216281	0	0	0	0	0	0	0	0	0	4	1623	0.193411	1623	0.0819313
Candidatus Omnitrophica bacterium CG1_02_41_171	0	0	7	1277	0.076348	1277	0.00827413	0	0	0	0	0	0	0	0	0	0	0	0	0	0	0	0	0	0	0	0	0	0	0	0	0	0	0	0
Omnitrophica WOR_2 bacterium GWF2_63_9	0	0	0	0	0	0	0	0	0	0	0	0	0	0	0	0	0	0	0	0	0	0	0	0	0	0	0	0	0	0	0	0	0	0	0
Chlamydia psittaci	0	0	0	0	0	0	0	0	0	0	0	0	0	0	2565	0.119293	0	0	0	2565	0.101049	0	0	0	0	0	0	0	0	0	0	0	0	0	0
Lentisphaerae bacterium GWF2_44_16	0	0	0	0	0	0	0	0	0	2	9069	1.61212	9069	0.315778	0	0	0	0	0	0	0	0	0	0	0	0	0	0	0	0	0	0	0	0	0
Lentisphaerae bacterium GWF2_57_35	0	0	0	0	0	0	0	0	0	2	264	0.0469292	264	0.00919233	0	0	0	0	0	0	0	0	0	0	0	0	0	0	0	0	0	0	0	0	0
Planctomycetia	0	0	0	0	0	0	0	0	0	0	0	0	0	0	0	0	0	0	0	0	0	0	0	2	238	0.028733	238	0.0101566	0	0	0	0	0	0	0
Planctomycetes bacterium RIFCSPHIGHO2_12_39_6	0	0	0	0	0	0	0	0	0	0	0	0	0	0	0	0	0	0	0	0	0	0	0	0	0	0	0	0	0	0	0	0	0	0	0
unclassified Verrucomicrobia (miscellaneous)	0	0	0	0	0	0	0	0	0	2	103	0.0183095	103	0.0035864	0	0	3	245	0.063112	245	0.00965186	0	0	0	0	0	0	0	0	0	0	0	0	0	0
Leptospira	0	0	0	0	0	0	0	0	0	0	0	0	0	0	0	0	0	0	0	0	0	0	0	0	0	0	0	0	0	0	0	0	0	0	0
Alkalispirochaeta odontotermitis	0	0	0	0	0	0	0	0	0	0	0	0	0	0	0	0	0	0	0	0	0	0	0	0	0	0	0	0	0	0	0	0	0	0	0
Marispirochaeta aestuarii	0	0	0	0	0	0	0	0	0	0	0	0	0	0	0	0	0	0	0	0	0	0	0	0	0	0	0	0	0	0	0	0	0	0	0
Sediminispirochaeta	0	0	0	0	0	0	0	0	0	0	0	0	0	0	0	0	0	0	0	0	0	0	0	0	0	0	0	0	0	0	0	0	0	0	0
Sphaerochaeta globosa	0	0	0	0	0	0	0	0	0	0	0	0	0	0	0	0	0	0	0	0	0	0	0	0	0	0	0	0	0	0	7	361	0.0430199	361	0.0182238
Treponema caldarium	0	0	0	0	0	0	0	0	0	0	0	0	0	0	0	0	0	0	0	0	0	0	0	0	0	0	0	0	0	0	0	0	0	0	0
Treponema socranskii	0	0	0	0	0	0	0	0	0	0	0	0	0	0	0	0	0	0	0	0	0	0	0	0	0	0	0	0	0	0	0	0	0	0	0
Spirochaetae bacterium HGW-Spirochaetae-1	0	0	0	0	0	0	0	0	0	0	0	0	0	0	0	0	0	0	0	0	0	0	0	0	0	0	0	0	0	0	0	0	0	0	0
Spirochaetae bacterium HGW-Spirochaetae-3	0	0	0	0	0	0	0	0	0	0	0	0	0	0	0	0	0	0	0	0	0	0	0	0	0	0	0	0	0	0	0	0	0	0	0
Spirochaetae bacterium HGW-Spirochaetae-5	0	0	0	0	0	0	0	0	0	0	0	0	0	0	0	0	0	0	0	0	0	0	0	0	0	0	0	0	0	0	0	0	0	0	0
Spirochaetae bacterium HGW-Spirochaetae-7	0	0	0	0	0	0	0	0	0	0	0	0	0	0	0	0	0	0	0	0	0	0	0	3	536	0.0647095	536	0.0228738	0	0	0	0	0	0	0
Spirochaetae bacterium HGW-Spirochaetae-8	0	0	0	0	0	0	0	0	0	2	122	0.021687	122	0.00424797	0	0	0	0	0	0	0	0	0	0	0	0	0	0	0	0	0	0	0	0	0
Spirochaetae bacterium HGW-Spirochaetae-9	0	0	118	87544	5.23399	87544	0.567228	0	0	22	677	0.120345	677	0.0235728	0	0	20	610	0.157136	610	0.0240312	0	0	120	58033	7.00613	58033	2.47656	0	0	45	93930	11.1935	93930	4.74172
Spirochaetes bacterium RBG_13_68_11	0	0	0	0	0	0	0	0	0	0	0	0	0	0	0	0	0	0	0	0	0	0	0	0	0	0	0	0	0	0	0	0	0	0	0
Acetomicrobium	0	0	4	257	0.0153653	257	0.00166519	0	0	0	0	0	0	0	0	0	5	1069	0.275374	1069	0.0421136	0	0	2	671	0.0810076	671	0.0286349	0	0	0	0	0	0	0
Aminiphilus circumscriptus	0	0	0	0	0	0	0	0	0	0	0	0	0	0	0	0	0	0	0	0	0	0	0	2	779	0.0940461	779	0.0332438	0	0	0	0	0	0	0
Aminobacterium colombiense	14826	0.107739	0	0	0	14826	0.0960629	8972	0.388498	0	0	0	8972	0.3124	8924	0.415037	3	685	0.176456	9609	0.37855	0	0	0	0	0	0	0	7260	0.635849	0	0	0	7260	0.366495
Aminobacterium mobile	0	0	0	0	0	0	0	0	0	0	0	0	0	0	0	0	0	0	0	0	0	0	0	0	0	0	0	0	0	0	0	0	0	0	0
Aminomonas paucivorans	0	0	0	0	0	0	0	0	0	0	0	0	0	0	0	0	0	0	0	0	0	0	0	0	0	0	0	0	0	0	0	0	0	0	0
Dethiosulfovibrio	0	0	0	0	0	0	0	0	0	0	0	0	0	0	0	0	2	147	0.0378672	147	0.00579112	0	0	0	0	0	0	0	0	0	0	0	0	0	0
Thermovirga lienii	0	0	0	0	0	0	0	0	0	0	0	0	0	0	0	0	3	567	0.146059	567	0.0223372	0	0	0	0	0	0	0	0	0	0	0	0	0	0
Synergistales bacterium 53_16	0	0	5	368	0.0220016	368	0.0023844	0	0	2	116	0.0206204	116	0.00403906	0	0	5	599	0.154302	599	0.0235978	0	0	2	3869	0.467092	3869	0.165109	0	0	0	0	0	0	0
Synergistales bacterium 54_24	0	0	0	0	0	0	0	0	0	0	0	0	0	0	0	0	2	209	0.0538384	209	0.00823363	0	0	0	0	0	0	0	0	0	0	0	0	0	0
Synergistales bacterium 54_9	0	0	4	413	0.024692	413	0.00267597	0	0	0	0	0	0	0	0	0	5	896	0.230809	896	0.0352982	0	0	2	540	0.0651924	540	0.0230445	0	0	0	0	0	0	0
Synergistales bacterium 57_84	0	0	19	1227	0.0733586	1227	0.00795016	0	0	6	262	0.0465736	262	0.0091227	0	0	25	4846	1.24833	4846	0.19091	0	0	15	12847	1.55098	12847	0.548245	0	0	10	20316	2.42103	20316	1.02558
Synergistales bacterium 58_81	0	0	25	1817	0.108633	1817	0.011773	0	0	20	871	0.154831	871	0.0303277	0	0	37	5706	1.46986	5706	0.22479	0	0	17	10366	1.25145	10366	0.442369	0	0	16	12603	1.50188	12603	0.636217
Synergistetes bacterium HGW-Synergistetes-2	0	0	0	0	0	0	0	0	0	0	0	0	0	0	0	0	0	0	0	0	0	0	0	0	0	0	0	0	0	0	9	273	0.032533	273	0.0137814
Corynebacterium freneyi	0	0	0	0	0	0	0	0	0	0	0	0	0	0	0	0	0	0	0	0	0	0	0	0	0	0	0	0	0	0	6	1176	0.140142	1176	0.0593661
Corynebacterium halotolerans	0	0	0	0	0	0	0	0	0	0	0	0	0	0	0	0	0	0	0	0	0	0	0	0	0	0	0	0	0	0	17	2848	0.339392	2848	0.143771
Corynebacterium sp. HMSC11E11	0	0	0	0	0	0	0	0	0	0	0	0	0	0	0	0	0	0	0	0	0	0	0	0	0	0	0	0	0	0	6	755	0.0899723	755	0.0381134
Corynebacterium xerosis	0	0	0	0	0	0	0	0	0	0	0	0	0	0	0	0	0	0	0	0	0	0	0	0	0	0	0	0	0	0	26	4342	0.51743	4342	0.21919
Mycobacteriaceae	0	0	0	0	0	0	0	0	0	0	0	0	0	0	0	0	2	294	0.0757344	294	0.0115822	0	0	0	0	0	0	0	0	0	0	0	0	0	0
Streptomyces	0	0	0	0	0	0	0	0	0	0	0	0	0	0	0	0	0	0	0	0	0	0	0	0	0	0	0	0	0	0	0	0	0	0	0
Streptosporangiaceae	0	0	0	0	0	0	0	0	0	0	0	0	0	0	0	0	0	0	0	0	0	0	0	0	0	0	0	0	0	0	0	0	0	0	0
Actinobacteria bacterium 66_15	0	0	0	0	0	0	0	0	0	2	2234	0.39712	2234	0.0777867	0	0	3	5223	1.34544	5223	0.205762	0	0	3	27859	3.36333	27859	1.18888	0	0	8	19788	2.35811	19788	0.998926
Collinsella aerofaciens	0	0	0	0	0	0	0	0	0	0	0	0	0	0	0	0	0	0	0	0	0	0	0	0	0	0	0	0	0	0	0	0	0	0	0
Coriobacteriaceae bacterium EMTCatB1	0	0	0	0	0	0	0	0	0	0	0	0	0	0	0	0	0	0	0	0	0	0	0	0	0	0	0	0	0	0	0	0	0	0	0
Rubrobacter xylanophilus	0	0	0	0	0	0	0	0	0	3	12562	2.23305	12562	0.437402	0	0	0	0	0	0	0	0	0	0	0	0	0	0	0	0	0	0	0	0	0
Chthonomonas calidirosea	0	0	0	0	0	0	0	0	0	0	0	0	0	0	0	0	0	0	0	0	0	0	0	2	45	0.0054327	45	0.00192037	0	0	0	0	0	0	0
Brevefilum fermentans	0	0	0	0	0	0	0	0	0	11	713	0.126744	713	0.0248263	0	0	5	270	0.069552	270	0.0106367	0	0	0	0	0	0	0	0	0	0	0	0	0	0
Anaerolineaceae bacterium 4572_78	0	0	0	0	0	0	0	0	0	0	0	0	0	0	0	0	0	0	0	0	0	0	0	0	0	0	0	0	0	0	0	0	0	0	0
Anaerolineaceae bacterium 46_22	0	0	0	0	0	0	0	0	0	2	103	0.0183095	103	0.0035864	0	0	0	0	0	0	0	0	0	0	0	0	0	0	0	0	0	0	0	0	0
Anaerolineae bacterium 49_20	0	0	0	0	0	0	0	0	0	35	1590	0.282642	1590	0.0553629	0	0	14	597	0.153787	597	0.023519	0	0	0	0	0	0	0	0	0	6	162	0.0193053	162	0.00817799
Anaerolineae bacterium UTCFX2	0	0	5	228	0.0136314	228	0.00147729	0	0	0	0	0	0	0	0	0	0	0	0	0	0	0	0	0	0	0	0	0	0	0	0	0	0	0	0
Ardenticatenaceae	0	0	4	402	0.0240344	402	0.0026047	0	0	0	0	0	0	0	0	0	0	0	0	0	0	0	0	0	0	0	0	0	0	0	0	0	0	0	0
Chloroflexi bacterium 44-23	0	0	0	0	0	0	0	0	0	0	0	0	0	0	0	0	2	81	0.0208656	81	0.00319102	0	0	0	0	0	0	0	0	0	0	0	0	0	0
Chloroflexi bacterium HGW-Chloroflexi-2	0	0	0	0	0	0	0	0	0	2	73	0.0129766	73	0.00254182	0	0	0	0	0	0	0	0	0	0	0	0	0	0	0	0	0	0	0	0	0
Chloroflexi bacterium HGW-Chloroflexi-5	0	0	4	4561	0.272688	4561	0.0295523	0	0	0	0	0	0	0	0	0	0	0	0	0	0	0	0	0	0	0	0	0	0	0	0	0	0	0	0
Chloroflexi bacterium RBG_13_50_10	0	0	0	0	0	0	0	0	0	0	0	0	0	0	0	0	0	0	0	0	0	0	0	0	0	0	0	0	0	0	0	0	0	0	0
Chloroflexi bacterium RBG_16_54_18	0	0	4	146	0.0087289	146	0.000945985	0	0	0	0	0	0	0	0	0	0	0	0	0	0	0	0	0	0	0	0	0	0	0	0	0	0	0	0
Chloroflexi bacterium RBG_16_57_11	0	0	5	197	0.011778	197	0.00127643	0	0	0	0	0	0	0	0	0	0	0	0	0	0	0	0	0	0	0	0	0	0	0	0	0	0	0	0
Chloroflexi bacterium RBG_16_57_8	0	0	0	0	0	0	0	0	0	0	0	0	0	0	0	0	0	0	0	0	0	0	0	0	0	0	0	0	0	0	0	0	0	0	0
Candidatus Margulisbacteria	0	0	0	0	0	0	0	0	0	2	1393	0.247622	1393	0.0485035	0	0	2	1248	0.321485	1248	0.0491654	0	0	0	0	0	0	0	0	0	0	0	0	0	0
Candidatus Melainabacteria bacterium HGW-Melainabacteria-1	0	0	10	5661	0.338454	5661	0.0366796	0	0	5	295	0.0524398	295	0.0102717	0	0	4	114	0.0293664	114	0.00449107	0	0	8	3082	0.37208	3082	0.131524	0	0	0	0	0	0	0
Nostocales	0	0	0	0	0	0	0	0	0	3	229	0.0407075	229	0.00797365	0	0	2	1184	0.304998	1184	0.0466441	0	0	0	0	0	0	0	0	0	0	0	0	0	0
Oscillatoriales	0	0	0	0	0	0	0	0	0	0	0	0	0	0	0	0	0	0	0	0	0	0	0	0	0	0	0	0	0	0	0	0	0	0	0
Alicyclobacillus	0	0	0	0	0	0	0	0	0	0	0	0	0	0	0	0	0	0	0	0	0	0	0	0	0	0	0	0	0	0	0	0	0	0	0
Bacillus azotoformans	0	0	0	0	0	0	0	0	0	0	0	0	0	0	0	0	0	0	0	0	0	0	0	0	0	0	0	0	0	0	0	0	0	0	0
Bacillus toyonensis	0	0	0	0	0	0	0	0	0	0	0	0	0	0	0	0	0	0	0	0	0	0	0	0	0	0	0	0	0	0	0	0	0	0	0
Bacillus humi	0	0	0	0	0	0	0	0	0	0	0	0	0	0	0	0	0	0	0	0	0	0	0	0	0	0	0	0	0	0	0	0	0	0	0
Bacillus subtilis group	0	0	0	0	0	0	0	0	0	0	0	0	0	0	0	0	0	0	0	0	0	0	0	0	0	0	0	0	0	0	0	0	0	0	0
Tepidibacillus sp. HK-1	0	0	0	0	0	0	0	0	0	0	0	0	0	0	0	0	0	0	0	0	0	0	0	0	0	0	0	0	0	0	0	0	0	0	0
Paenibacillus glacialis	0	0	0	0	0	0	0	0	0	0	0	0	0	0	0	0	0	0	0	0	0	0	0	0	0	0	0	0	0	0	0	0	0	0	0
Paenibacillus sp. URHA0014	0	0	0	0	0	0	0	0	0	0	0	0	0	0	0	0	0	0	0	0	0	0	0	0	0	0	0	0	0	0	0	0	0	0	0
Kurthia senegalensis	0	0	0	0	0	0	0	0	0	0	0	0	0	0	0	0	0	0	0	0	0	0	0	0	0	0	0	0	0	0	0	0	0	0	0
Sporolactobacillus pectinivorans	0	0	0	0	0	0	0	0	0	0	0	0	0	0	0	0	0	0	0	0	0	0	0	0	0	0	0	0	0	0	0	0	0	0	0
Desulfuribacillus	0	0	0	0	0	0	0	0	0	0	0	0	0	0	0	0	0	0	0	0	0	0	0	0	0	0	0	0	0	0	0	0	0	0	0
Trichococcus alkaliphilus	0	0	0	0	0	0	0	0	0	0	0	0	0	0	0	0	0	0	0	0	0	0	0	0	0	0	0	0	0	0	0	0	0	0	0
Enterococcus	0	0	0	0	0	0	0	0	0	0	0	0	0	0	0	0	0	0	0	0	0	0	0	0	0	0	0	0	0	0	0	0	0	0	0
Caldicoprobacter	0	0	0	0	0	0	0	0	0	0	0	0	0	0	0	0	0	0	0	0	0	0	0	2	412	0.0497394	412	0.0175821	0	0	0	0	0	0	0
Alkaliphilus metalliredigens	0	0	0	0	0	0	0	0	0	0	0	0	0	0	0	0	0	0	0	0	0	0	0	0	0	0	0	0	0	0	0	0	0	0	0
Clostridiisalibacter paucivorans	0	0	0	0	0	0	0	0	0	0	0	0	0	0	0	0	0	0	0	0	0	0	0	0	0	0	0	0	0	0	0	0	0	0	0
Clostridium beijerinckii	0	0	0	0	0	0	0	0	0	0	0	0	0	0	0	0	0	0	0	0	0	0	0	0	0	0	0	0	0	0	0	0	0	0	0
Clostridium botulinum	0	0	0	0	0	0	0	0	0	0	0	0	0	0	0	0	0	0	0	0	0	0	0	2	206	0.0248697	206	0.00879104	0	0	0	0	0	0	0
Clostridium formicaceticum	0	0	0	0	0	0	0	0	0	0	0	0	0	0	0	0	0	0	0	0	0	0	0	0	0	0	0	0	0	0	0	0	0	0	0
Clostridium sp. DL-VIII	0	0	0	0	0	0	0	0	0	0	0	0	0	0	0	0	0	0	0	0	0	0	0	0	0	0	0	0	0	0	0	0	0	0	0
Clostridium sp. KNHs205	0	0	0	0	0	0	0	0	0	0	0	0	0	0	0	0	0	0	0	0	0	0	0	0	0	0	0	0	0	0	0	0	0	0	0
Clostridium sp. SN20	0	0	0	0	0	0	0	0	0	0	0	0	0	0	0	0	0	0	0	0	0	0	0	0	0	0	0	0	0	0	0	0	0	0	0
Clostridium sp. CAG:967	0	0	0	0	0	0	0	0	0	0	0	0	0	0	0	0	2	144	0.0370944	144	0.00567293	0	0	0	0	0	0	0	0	0	0	0	0	0	0
Geosporobacter ferrireducens	0	0	0	0	0	0	0	0	0	0	0	0	0	0	0	0	0	0	0	0	0	0	0	0	0	0	0	0	0	0	0	0	0	0	0
Inediibacterium massiliense	0	0	0	0	0	0	0	0	0	0	0	0	0	0	0	0	0	0	0	0	0	0	0	0	0	0	0	0	0	0	0	0	0	0	0
Lutispora thermophila	0	0	0	0	0	0	0	0	0	0	0	0	0	0	0	0	0	0	0	0	0	0	0	2	164	0.0197992	164	0.00699869	0	0	0	0	0	0	0
Natronincola peptidivorans	0	0	0	0	0	0	0	0	0	0	0	0	0	0	0	0	0	0	0	0	0	0	0	2	154	0.0185919	154	0.00657194	0	0	0	0	0	0	0
Oxobacter pfennigii	0	0	0	0	0	0	0	0	0	0	0	0	0	0	0	0	0	0	0	0	0	0	0	0	0	0	0	0	0	0	0	0	0	0	0
Paramaledivibacter caminithermalis	0	0	0	0	0	0	0	0	0	0	0	0	0	0	0	0	0	0	0	0	0	0	0	2	119	0.0143665	119	0.00507832	0	0	0	0	0	0	0
Youngiibacter fragilis	0	0	0	0	0	0	0	0	0	0	0	0	0	0	0	0	0	0	0	0	0	0	0	0	0	0	0	0	0	0	0	0	0	0	0
Acidaminobacter hydrogenoformans	0	0	0	0	0	0	0	0	0	0	0	0	0	0	0	0	0	0	0	0	0	0	0	0	0	0	0	0	0	0	0	0	0	0	0
Gracilibacter sp. BRH_c7a	0	0	0	0	0	0	0	0	0	0	0	0	0	0	0	0	0	0	0	0	0	0	0	0	0	0	0	0	0	0	0	0	0	0	0
Pseudoclostridium thermosuccinogenes	0	0	4	7996	0.478057	7996	0.0518089	0	0	0	0	0	0	0	0	0	0	0	0	0	0	0	0	6	2424	0.292642	2424	0.103444	0	0	0	0	0	0	0
Ruminiclostridium cellobioparum	0	0	0	0	0	0	0	0	0	0	0	0	0	0	0	0	0	0	0	0	0	0	0	0	0	0	0	0	0	0	0	0	0	0	0
Thermoclostridium stercorarium	0	0	8	228	0.0136314	228	0.00147729	0	0	0	0	0	0	0	0	0	0	0	0	0	0	0	0	0	0	0	0	0	0	0	0	0	0	0	0
Blautia sp. Marseille-P3087	0	0	0	0	0	0	0	0	0	0	0	0	0	0	0	0	0	0	0	0	0	0	0	0	0	0	0	0	0	0	0	0	0	0	0
Parasporobacterium paucivorans	0	0	0	0	0	0	0	0	0	0	0	0	0	0	0	0	0	0	0	0	0	0	0	0	0	0	0	0	0	0	0	0	0	0	0
Lachnospiraceae bacterium	0	0	0	0	0	0	0	0	0	0	0	0	0	0	0	0	0	0	0	0	0	0	0	0	0	0	0	0	0	0	0	0	0	0	0
Dehalobacter sp. CF	0	0	0	0	0	0	0	0	0	0	0	0	0	0	0	0	0	0	0	0	0	0	0	0	0	0	0	0	0	0	0	0	0	0	0
Dehalobacter sp. TeCB1	0	0	0	0	0	0	0	0	0	0	0	0	0	0	0	0	0	0	0	0	0	0	0	0	0	0	0	0	0	0	0	0	0	0	0
Dehalobacterium formicoaceticum	0	0	7	21047	1.25834	21047	0.136371	0	0	0	0	0	0	0	0	0	2	956	0.246265	956	0.037662	0	0	0	0	0	0	0	0	0	0	0	0	0	0
Desulfallas arcticus	0	0	0	0	0	0	0	0	0	0	0	0	0	0	0	0	0	0	0	0	0	0	0	0	0	0	0	0	0	0	0	0	0	0	0
Desulfallas gibsoniae	0	0	10	39513	2.36236	39513	0.256019	0	0	0	0	0	0	0	0	0	0	0	0	0	0	0	0	8	1595	0.192559	1595	0.0680665	0	0	0	0	0	0	0
Desulfitibacter	0	0	4	1996	0.119335	1996	0.0129328	0	0	0	0	0	0	0	0	0	0	0	0	0	0	0	0	2	130	0.0156945	130	0.00554774	0	0	0	0	0	0	0
Desulfitobacterium hafniense	0	0	0	0	0	0	0	0	0	0	0	0	0	0	0	0	0	0	0	0	0	0	0	2	185	0.0223344	185	0.00789487	0	0	0	0	0	0	0
Desulfofarcimen intricatum	0	0	0	0	0	0	0	0	0	0	0	0	0	0	0	0	0	0	0	0	0	0	0	0	0	0	0	0	0	0	0	0	0	0	0
Desulfofundulus kuznetsovii	0	0	0	0	0	0	0	0	0	0	0	0	0	0	0	0	0	0	0	0	0	0	0	0	0	0	0	0	0	0	0	0	0	0	0
Desulfosporosinus lacus	0	0	0	0	0	0	0	0	0	0	0	0	0	0	0	0	0	0	0	0	0	0	0	0	0	0	0	0	0	0	0	0	0	0	0
Desulfosporosinus orientis	0	0	0	0	0	0	0	0	0	0	0	0	0	0	0	0	0	0	0	0	0	0	0	0	0	0	0	0	0	0	0	0	0	0	0
Desulfosporosinus sp. BG	0	0	0	0	0	0	0	0	0	0	0	0	0	0	0	0	0	0	0	0	0	0	0	0	0	0	0	0	0	0	0	0	0	0	0
Desulfosporosinus sp. BICA1-9	0	0	0	0	0	0	0	0	0	0	0	0	0	0	0	0	0	0	0	0	0	0	0	0	0	0	0	0	0	0	0	0	0	0	0
Desulfosporosinus sp. BRH_c37	0	0	0	0	0	0	0	0	0	0	0	0	0	0	0	0	0	0	0	0	0	0	0	0	0	0	0	0	0	0	0	0	0	0	0
Desulfosporosinus sp. I2	0	0	0	0	0	0	0	0	0	0	0	0	0	0	0	0	0	0	0	0	0	0	0	0	0	0	0	0	0	0	0	0	0	0	0
Desulfosporosinus sp. SbF1	0	0	0	0	0	0	0	0	0	0	0	0	0	0	0	0	0	0	0	0	0	0	0	0	0	0	0	0	0	0	0	0	0	0	0
Desulfosporosinus sp. Tol-M	0	0	0	0	0	0	0	0	0	0	0	0	0	0	0	0	0	0	0	0	0	0	0	0	0	0	0	0	0	0	0	0	0	0	0
Desulfosporosinus youngiae	0	0	0	0	0	0	0	0	0	0	0	0	0	0	0	0	0	0	0	0	0	0	0	2	593	0.0715909	593	0.0253062	0	0	0	0	0	0	0
Desulfotomaculum aeronauticum	0	0	0	0	0	0	0	0	0	0	0	0	0	0	0	0	0	0	0	0	0	0	0	0	0	0	0	0	0	0	0	0	0	0	0
Desulfotomaculum ferrireducens	0	0	0	0	0	0	0	0	0	0	0	0	0	0	0	0	0	0	0	0	0	0	0	5	3813	0.460331	3813	0.16272	0	0	0	0	0	0	0
Desulfotomaculum hydrothermale	0	0	0	0	0	0	0	0	0	0	0	0	0	0	0	0	0	0	0	0	0	0	0	3	250	0.0301817	250	0.0106687	0	0	0	0	0	0	0
Desulfotomaculum reducens	0	0	0	0	0	0	0	0	0	2	501	0.0890588	501	0.0174445	0	0	0	0	0	0	0	0	0	0	0	0	0	0	0	0	0	0	0	0	0
Desulfotomaculum ruminis	0	0	0	0	0	0	0	0	0	0	0	0	0	0	0	0	0	0	0	0	0	0	0	0	0	0	0	0	0	0	0	0	0	0	0
Desulfotomaculum sp. 46_296	0	0	0	0	0	0	0	0	0	2	3789	0.67354	3789	0.131931	0	0	0	0	0	0	0	0	0	0	0	0	0	0	0	0	0	0	0	0	0
Desulfotomaculum sp. 46_80	0	0	4	816	0.0487862	816	0.00528715	0	0	0	0	0	0	0	0	0	0	0	0	0	0	0	0	3	2299	0.277551	2299	0.0981097	0	0	0	0	0	0	0
Desulfotomaculum sp. BICA1-6	0	0	0	0	0	0	0	0	0	0	0	0	0	0	0	0	0	0	0	0	0	0	0	0	0	0	0	0	0	0	0	0	0	0	0
Pelotomaculum thermopropionicum	0	0	0	0	0	0	0	0	0	0	0	0	0	0	0	0	0	0	0	0	0	0	0	17	582	0.070263	582	0.0248368	0	0	0	0	0	0	0
Syntrophobotulus glycolicus	0	0	0	0	0	0	0	0	0	0	0	0	0	0	0	0	0	0	0	0	0	0	0	2	791	0.0954948	791	0.0337559	0	0	0	0	0	0	0
Peptococcaceae bacterium 1109	0	0	0	0	0	0	0	0	0	0	0	0	0	0	0	0	0	0	0	0	0	0	0	2	53	0.00639852	53	0.00226177	0	0	0	0	0	0	0
Peptococcaceae bacterium BICA1-7	0	0	0	0	0	0	0	0	0	0	0	0	0	0	0	0	0	0	0	0	0	0	0	2	612	0.0738848	612	0.0261171	0	0	0	0	0	0	0
Peptococcaceae bacterium BRH_c4a	0	0	0	0	0	0	0	0	0	0	0	0	0	0	0	0	0	0	0	0	0	0	0	0	0	0	0	0	0	0	0	0	0	0	0
Peptococcaceae bacterium SCADC1_2_3	0	0	0	0	0	0	0	0	0	0	0	0	0	0	0	0	0	0	0	0	0	0	0	0	0	0	0	0	0	0	0	0	0	0	0
Clostridioides difficile	0	0	0	0	0	0	0	0	0	0	0	0	0	0	0	0	0	0	0	0	0	0	0	0	0	0	0	0	0	0	0	0	0	0	0
Criibacterium bergeronii	0	0	0	0	0	0	0	0	0	0	0	0	0	0	0	0	0	0	0	0	0	0	0	0	0	0	0	0	0	0	4	513	0.0611335	513	0.025897
Peptoclostridium litorale	0	0	0	0	0	0	0	0	0	0	0	0	0	0	0	0	0	0	0	0	0	0	0	0	0	0	0	0	0	0	0	0	0	0	0
Hydrogenoanaerobacterium saccharovorans	0	0	0	0	0	0	0	0	0	0	0	0	0	0	0	0	0	0	0	0	0	0	0	0	0	0	0	0	0	0	0	0	0	0	0
Sporobacter termitidis	0	0	0	0	0	0	0	0	0	0	0	0	0	0	0	0	0	0	0	0	0	0	0	2	1327	0.160204	1327	0.0566297	0	0	0	0	0	0	0
[Clostridium] methylpentosum	0	0	0	0	0	0	0	0	0	0	0	0	0	0	0	0	0	0	0	0	0	0	0	0	0	0	0	0	0	0	0	0	0	0	0
[Clostridium] sporosphaeroides	0	0	0	0	0	0	0	0	0	0	0	0	0	0	0	0	0	0	0	0	0	0	0	0	0	0	0	0	0	0	0	0	0	0	0
Syntrophomonas palmitatica	0	0	12	4500	0.269041	4500	0.0291571	0	0	6	1898	0.337392	1898	0.0660873	0	0	5	1162	0.299331	1162	0.0457774	0	0	9	1192	0.143906	1192	0.0508685	0	0	0	0	0	0	0
Syntrophomonas wolfei	1390170	10.1022	73	51598	3.08489	1441768	9.34172	0	0	12	13838	2.45987	13838	0.481832	0	0	11	13126	3.38126	13126	0.517103	142187	9.38542	50	20729	2.50254	162916	6.95243	20187	1.76803	31	18916	2.25419	39103	1.97397
Syntrophomonas zehnderi	0	0	12	3400	0.203276	3400	0.0220298	0	0	6	6865	1.22034	6865	0.239036	0	0	2	2193	0.564916	2193	0.086394	0	0	7	3749	0.452604	3749	0.159988	0	0	11	3102	0.369661	3102	0.156593
Syntrophothermus lipocalidus	0	0	10	2525	0.150962	2525	0.0163604	0	0	2	9515	1.69141	9515	0.331307	0	0	0	0	0	0	0	0	0	5	8183	0.987907	8183	0.349209	0	0	0	0	0	0	0
Thermosyntropha lipolytica	0	0	0	0	0	0	0	0	0	0	0	0	0	0	0	0	0	0	0	0	0	0	0	0	0	0	0	0	0	0	0	0	0	0	0
Anaerovirgula multivorans	0	0	0	0	0	0	0	0	0	0	0	0	0	0	0	0	0	0	0	0	0	0	0	0	0	0	0	0	0	0	0	0	0	0	0
Intestinimonas butyriciproducens	0	0	0	0	0	0	0	0	0	0	0	0	0	0	0	0	0	0	0	0	0	0	0	0	0	0	0	0	0	0	0	0	0	0	0
Proteiniborus ethanoligenes	0	0	0	0	0	0	0	0	0	0	0	0	0	0	0	0	0	0	0	0	0	0	0	0	0	0	0	0	0	0	0	0	0	0	0
Clostridiales bacterium DRI-13	0	0	0	0	0	0	0	0	0	0	0	0	0	0	0	0	0	0	0	0	0	0	0	0	0	0	0	0	0	0	0	0	0	0	0
Clostridiales bacterium oral taxon 876	0	0	0	0	0	0	0	0	0	0	0	0	0	0	0	0	0	0	0	0	0	0	0	0	0	0	0	0	0	0	0	0	0	0	0
Acetohalobium arabaticum	0	0	0	0	0	0	0	0	0	0	0	0	0	0	0	0	0	0	0	0	0	0	0	0	0	0	0	0	0	0	0	0	0	0	0
Natranaerobius trueperi	0	0	0	0	0	0	0	0	0	0	0	0	0	0	0	0	0	0	0	0	0	0	0	0	0	0	0	0	0	0	0	0	0	0	0
Caldanaerobius	0	0	0	0	0	0	0	0	0	0	0	0	0	0	0	0	0	0	0	0	0	0	0	0	0	0	0	0	0	0	0	0	0	0	0
Moorella	0	0	5	1130	0.0675593	1130	0.00732167	0	0	3	803	0.142743	803	0.02796	0	0	0	0	0	0	0	0	0	3	436	0.0526369	436	0.0186063	0	0	0	0	0	0	0
Thermacetogenium phaeum	0	0	0	0	0	0	0	0	0	0	0	0	0	0	0	0	0	0	0	0	0	0	0	2	209	0.0252319	209	0.00891906	0	0	0	0	0	0	0
Syntrophaceticus schinkii	0	0	0	0	0	0	0	0	0	0	0	0	0	0	0	0	0	0	0	0	0	0	0	0	0	0	0	0	0	0	0	0	0	0	0
Thermoanaerobacterium	0	0	0	0	0	0	0	0	0	0	0	0	0	0	0	0	0	0	0	0	0	0	0	2	1137	0.137266	1137	0.0485214	0	0	0	0	0	0	0
Mahella australiensis	0	0	0	0	0	0	0	0	0	2	7113	1.26442	7113	0.247671	0	0	0	0	0	0	0	0	0	0	0	0	0	0	0	0	0	0	0	0	0
Thermoanaerobacterales bacterium 50_218	0	0	0	0	0	0	0	0	0	0	0	0	0	0	0	0	0	0	0	0	0	0	0	0	0	0	0	0	0	0	0	0	0	0	0
Clostridia bacterium	0	0	0	0	0	0	0	0	0	0	0	0	0	0	0	0	0	0	0	0	0	0	0	0	0	0	0	0	0	0	0	0	0	0	0
Clostridia bacterium BRH_c25	0	0	0	0	0	0	0	0	0	0	0	0	0	0	0	0	0	0	0	0	0	0	0	10	740	0.0893378	740	0.0315795	0	0	0	0	0	0	0
Firmicutes bacterium CAG:103	0	0	0	0	0	0	0	0	0	0	0	0	0	0	0	0	0	0	0	0	0	0	0	0	0	0	0	0	0	0	0	0	0	0	0
Coprobacillus sp. 8_1_38FAA	0	0	0	0	0	0	0	0	0	0	0	0	0	0	0	0	0	0	0	0	0	0	0	0	0	0	0	0	0	0	0	0	0	0	0
Turicibacter	0	0	0	0	0	0	0	0	0	0	0	0	0	0	0	0	0	0	0	0	0	0	0	0	0	0	0	0	0	0	0	0	0	0	0
Limnochorda pilosa	0	0	0	0	0	0	0	0	0	0	0	0	0	0	0	0	0	0	0	0	0	0	0	0	0	0	0	0	0	0	0	0	0	0	0
Selenomonadaceae	0	0	0	0	0	0	0	0	0	0	0	0	0	0	0	0	0	0	0	0	0	0	0	2	147	0.0177468	147	0.00627322	0	0	0	0	0	0	0
Sporomusa silvacetica	0	0	0	0	0	0	0	0	0	2	10121	1.79913	10121	0.352408	0	0	0	0	0	0	0	0	0	0	0	0	0	0	0	0	0	0	0	0	0
Megasphaera	0	0	0	0	0	0	0	0	0	2	78	0.0138654	78	0.00271592	0	0	0	0	0	0	0	0	0	0	0	0	0	0	0	0	0	0	0	0	0
Peptoniphilaceae	0	0	0	0	0	0	0	0	0	2	136	0.0241756	136	0.00473545	0	0	0	0	0	0	0	0	0	0	0	0	0	0	0	0	0	0	0	0	0
[Clostridium] ultunense	0	0	0	0	0	0	0	0	0	0	0	0	0	0	0	0	0	0	0	0	0	0	0	2	528	0.0637437	528	0.0225324	0	0	0	0	0	0	0
Sedimentibacter sp. B4	0	0	105	7598	0.454261	7598	0.0492301	0	0	0	0	0	0	0	0	0	0	0	0	0	0	0	0	0	0	0	0	0	0	0	0	0	0	0	0
Firmicutes bacterium HGW-Firmicutes-1	0	0	0	0	0	0	0	0	0	0	0	0	0	0	0	0	0	0	0	0	0	0	0	2	164	0.0197992	164	0.00699869	0	0	0	0	0	0	0
Firmicutes bacterium HGW-Firmicutes-11	0	0	0	0	0	0	0	0	0	0	0	0	0	0	0	0	0	0	0	0	0	0	0	0	0	0	0	0	0	0	4	107	0.012751	107	0.00540151
Firmicutes bacterium HGW-Firmicutes-14	0	0	0	0	0	0	0	0	0	0	0	0	0	0	0	0	0	0	0	0	0	0	0	0	0	0	0	0	0	0	0	0	0	0	0
Firmicutes bacterium HGW-Firmicutes-15	0	0	130	28786	1.72103	28786	0.186515	0	0	18	11998	2.13279	11998	0.417764	0	0	21	5636	1.45183	5636	0.222032	0	0	16	9116	1.10054	9116	0.389025	0	0	106	9704	1.15641	9704	0.489871
Firmicutes bacterium HGW-Firmicutes-8	0	0	0	0	0	0	0	0	0	0	0	0	0	0	0	0	0	0	0	0	0	0	0	2	140	0.0169017	140	0.00597449	0	0	0	0	0	0	0
Firmicutes bacterium ML8_F2	0	0	0	0	0	0	0	0	0	0	0	0	0	0	0	0	0	0	0	0	0	0	0	0	0	0	0	0	0	0	0	0	0	0	0
Acholeplasma equifetale	0	0	4	986	0.05895	986	0.00638864	0	0	0	0	0	0	0	0	0	0	0	0	0	0	0	0	0	0	0	0	0	0	0	0	0	0	0	0
Acholeplasma granularum	0	0	4	349	0.0208657	349	0.00226129	0	0	0	0	0	0	0	0	0	0	0	0	0	0	0	0	0	0	0	0	0	0	0	0	0	0	0	0
Acholeplasma oculi	0	0	6	1145	0.0684561	1145	0.00741886	0	0	0	0	0	0	0	0	0	0	0	0	0	0	0	0	0	0	0	0	0	0	0	0	0	0	0	0
unclassified Tenericutes	0	0	23	2735	0.163517	2735	0.017721	0	0	0	0	0	0	0	0	0	0	0	0	0	0	0	0	0	0	0	0	0	0	0	0	0	0	0	0
Mesotoga infera	0	0	10	2852	0.170512	2852	0.0184791	0	0	0	0	0	0	0	0	0	0	0	0	0	0	0	0	4	21756	2.62653	21756	0.928436	0	0	14	14940	1.78038	14940	0.754192
Mesotoga prima	0	0	0	0	0	0	0	0	0	0	0	0	0	0	0	0	0	0	0	0	0	0	0	2	3419	0.412765	3419	0.145906	0	0	0	0	0	0	0
Mesotoga sp. B105.6.4	0	0	0	0	0	0	0	0	0	0	0	0	0	0	0	0	0	0	0	0	0	0	0	2	2751	0.332119	2751	0.117399	0	0	4	212	0.0252637	212	0.0107021
Mesotoga sp. Brook.08.105.5.1	0	0	0	0	0	0	0	0	0	0	0	0	0	0	0	0	0	0	0	0	0	0	0	3	1548	0.186885	1548	0.0660608	0	0	0	0	0	0	0
Mesotoga sp. Brook.08.YT.4.2.5.1	0	0	4	8533	0.510162	8533	0.0552883	0	0	0	0	0	0	0	0	0	0	0	0	0	0	0	0	0	0	0	0	0	0	0	0	0	0	0	0
Mesotoga sp. H07.pep.5.3	0	0	8	4516	0.269998	4516	0.0292607	0	0	0	0	0	0	0	0	0	0	0	0	0	0	0	0	2	1993	0.240608	1993	0.0850512	0	0	5	302	0.0359889	302	0.0152454
Mesotoga sp. SC_NapDC3	0	0	6	2666	0.159392	2666	0.0172739	0	0	0	0	0	0	0	0	0	0	0	0	0	0	0	0	2	5344	0.645164	5344	0.228055	0	0	5	376	0.0448074	376	0.018981
Thermotoga sp. TBYP3.1.4.1	0	0	0	0	0	0	0	0	0	0	0	0	0	0	0	0	0	0	0	0	0	0	0	0	0	0	0	0	0	0	0	0	0	0	0
Thermotogales bacterium 46_20	0	0	6	2225	0.133026	2225	0.0144166	0	0	0	0	0	0	0	0	0	0	0	0	0	0	0	0	0	0	0	0	0	0	0	0	0	0	0	0
candidate division KSB1 bacterium 4484_87	0	0	0	0	0	0	0	0	0	0	0	0	0	0	0	0	0	0	0	0	0	0	0	0	0	0	0	0	0	0	0	0	0	0	0
candidate division SR1 bacterium RAAC1_SR1_1	0	0	0	0	0	0	0	0	0	0	0	0	0	0	0	0	0	0	0	0	0	0	0	6	1129	0.1363	1129	0.04818	0	0	5	425	0.0506467	425	0.0214546
Candidatus Atribacteria bacterium HGW-Atribacteria-1	0	0	0	0	0	0	0	0	0	0	0	0	0	0	0	0	0	0	0	0	0	0	0	0	0	0	0	0	0	0	0	0	0	0	0
Candidatus Riflebacteria bacterium HGW-Riflebacteria-1	0	0	0	0	0	0	0	0	0	0	0	0	0	0	0	0	0	0	0	0	0	0	0	0	0	0	0	0	0	0	8	326	0.038849	326	0.0164569
Candidatus Riflebacteria bacterium HGW-Riflebacteria-2	0	0	0	0	0	0	0	0	0	0	0	0	0	0	0	0	0	0	0	0	0	0	0	0	0	0	0	0	0	0	7	255	0.030388	255	0.0128728
Candidatus Saccharibacteria bacterium HGW-Saccharibacteria-1	0	0	0	0	0	0	0	0	0	0	0	0	0	0	0	0	0	0	0	0	0	0	0	0	0	0	0	0	0	0	0	0	0	0	0
Candidatus Amesbacteria bacterium RIFCSPLOWO2_01_FULL_49_25	0	0	0	0	0	0	0	0	0	0	0	0	0	0	0	0	0	0	0	0	0	0	0	0	0	0	0	0	0	0	0	0	0	0	0
Candidatus Levybacteria bacterium RBG_16_35_11	0	0	0	0	0	0	0	0	0	2	184	0.0327082	184	0.00640678	0	0	2	291	0.0749616	291	0.011464	0	0	0	0	0	0	0	0	0	0	0	0	0	0
Candidatus Falkowbacteria bacterium HGW-Falkowbacteria-2	0	0	0	0	0	0	0	0	0	0	0	0	0	0	0	0	0	0	0	0	0	0	0	0	0	0	0	0	0	0	0	0	0	0	0
Candidatus Nealsonbacteria	0	0	10	3047	0.182171	3047	0.0197426	0	0	0	0	0	0	0	0	0	3	559	0.143998	559	0.022022	0	0	0	0	0	0	0	0	0	0	0	0	0	0
Parcubacteria bacterium 32_520	0	0	17	103312	6.17671	103312	0.669395	0	0	10	18520	3.29215	18520	0.644856	0	0	13	25078	6.46009	25078	0.987957	0	0	0	0	0	0	0	0	0	0	0	0	0	0
Parcubacteria bacterium 33_209	0	0	32	6875	0.411035	6875	0.0445455	0	0	25	20045	3.56324	20045	0.697956	0	0	32	5810	1.49666	5810	0.228887	0	0	0	0	0	0	0	0	0	6	429	0.0511233	429	0.0216565
Parcubacteria bacterium 34_609	0	0	5	1128	0.0674397	1128	0.00730871	0	0	0	0	0	0	0	0	0	2	492	0.126739	492	0.0193825	0	0	0	0	0	0	0	0	0	0	0	0	0	0
Candidatus Wolfebacteria bacterium	0	0	0	0	0	0	0	0	0	0	0	0	0	0	0	0	2	107	0.0275632	107	0.0042153	0	0	0	0	0	0	0	0	0	6	310	0.0369423	310	0.0156492
bacterium BMS3Abin08	0	0	0	0	0	0	0	0	0	0	0	0	0	0	0	0	0	0	0	0	0	0	0	0	0	0	0	0	0	0	0	0	0	0	0
bacterium MS4	0	0	0	0	0	0	0	0	0	0	0	0	0	0	0	0	0	0	0	0	0	0	0	2	237	0.0286122	237	0.010114	0	0	0	0	0	0	0
bacterium SM23_57	0	0	0	0	0	0	0	0	0	0	0	0	0	0	0	0	0	0	0	0	0	0	0	0	0	0	0	0	0	0	0	0	0	0	0
uncultured archaeon	0	0	0	0	0	0	0	0	0	3	2590	0.460404	2590	0.0901824	0	0	0	0	0	0	0	0	0	0	0	0	0	0	0	0	0	0	0	0	0
Methanomassiliicoccales archaeon RumEn M1	0	0	0	0	0	0	0	0	0	0	0	0	0	0	0	0	0	0	0	0	0	0	0	3	3175	0.383307	3175	0.135493	0	0	0	0	0	0	0
Thermoplasmatales archaeon SG8-52-1	0	0	0	0	0	0	0	0	0	0	0	0	0	0	0	0	0	0	0	0	0	0	0	0	0	0	0	0	0	0	0	0	0	0	0
Thermoplasmatales archaeon SW_10_69_26	0	0	4	10177	0.608452	10177	0.0659404	0	0	2	789	0.140254	789	0.0274725	0	0	3	817	0.210459	817	0.032186	0	0	0	0	0	0	0	0	0	0	0	0	0	0
Methanobacterium sp. SMA-27	0	0	0	0	0	0	0	0	0	0	0	0	0	0	0	0	0	0	0	0	0	0	0	0	0	0	0	0	0	0	0	0	0	0	0
Methanococcales	0	0	0	0	0	0	0	0	0	0	0	0	0	0	0	0	0	0	0	0	0	0	0	0	0	0	0	0	0	0	0	0	0	0	0
Halostagnicola larsenii	0	0	0	0	0	0	0	0	0	0	0	0	0	0	0	0	0	0	0	0	0	0	0	0	0	0	0	0	0	0	0	0	0	0	0
Methanocella arvoryzae	0	0	0	0	0	0	0	0	0	2	2826	0.502355	2826	0.0983998	0	0	2	3257	0.839003	3257	0.128311	0	0	2	3662	0.442101	3662	0.156276	0	0	5	5369	0.639816	5369	0.271035
Methanocalculus sp. 52_23	0	0	7	2344	0.140141	2344	0.0151876	0	0	3	4989	0.886855	4989	0.173714	0	0	2	6497	1.67363	6497	0.255952	0	0	4	18009	2.17417	18009	0.768533	0	0	9	30782	3.66825	30782	1.55392
Methanoculleus bourgensis	32031	0.232766	101	165622	9.90204	197653	1.28066	6352	0.275049	34	34762	6.17936	41114	1.43157	7820	0.363692	35	43909	11.311	51729	2.03788	15138	0.999222	37	107510	12.9793	122648	5.234	13661	1.19646	50	75140	8.95433	88801	4.4828
Methanoculleus chikugoensis	17011	0.123617	6	6775	0.405057	23786	0.154118	4246	0.183857	4	975	0.173318	5221	0.181792	5187	0.241237	3	1049	0.270222	6236	0.245669	9973	0.658293	0	0	0	9973	0.425597	7722	0.676312	0	0	0	7722	0.389817
Methanoculleus horonobensis	0	0	0	0	0	0	0	0	0	0	0	0	0	0	0	0	3	1257	0.323803	1257	0.04952	2008	0.132543	2	189	0.0228174	2197	0.0937569	1608	0.140833	0	0	0	1608	0.0811741
Methanoculleus marisnigri	14558	0.105791	20	17070	1.02056	31628	0.204929	3508	0.1519	12	5840	1.03813	9348	0.325492	3810	0.177195	13	6332	1.63112	10142	0.399548	7158	0.472482	10	9826	1.18626	16984	0.724791	5825	0.510168	14	16593	1.97737	22418	1.13169
Methanoculleus sediminis	10331	0.0750743	5	4296	0.256845	14627	0.0947735	2463	0.106651	3	212	0.0376855	2675	0.093142	2546	0.118409	4	350	0.0901599	2896	0.114089	6052	0.399478	0	0	0	6052	0.258269	4544	0.397975	0	0	0	4544	0.229387
Methanoculleus sp. MAB1	13461	0.0978196	34	77497	4.63331	90958	0.589349	3077	0.133238	13	12361	2.19732	15438	0.537543	3361	0.156313	11	10865	2.79882	14226	0.560438	7878	0.520008	13	33871	4.08913	41749	1.78164	6722	0.588729	39	61370	7.31338	68092	3.43738
Methanoculleus sp. MH98A	0	0	6	16485	0.985588	16485	0.106812	0	0	2	269	0.047818	269	0.00936643	0	0	0	0	0	0	0	0	0	2	23234	2.80496	23234	0.99151	0	0	4	19604	2.33618	19604	0.989637
Methanoculleus thermophilus	0	0	0	0	0	0	0	1881	0.0814494	4	2814	0.500222	4695	0.163477	1995	0.0927833	5	4489	1.15637	6484	0.25544	3005	0.198353	2	7224	0.87213	10229	0.436522	2176	0.190579	8	8844	1.05393	11020	0.556305
Methanofollis ethanolicus	0	0	9	54432	3.25432	54432	0.352684	0	0	0	0	0	0	0	0	0	4	6235	1.60613	6235	0.24563	0	0	4	16786	2.02652	16786	0.716342	0	0	10	17434	2.07759	17434	0.880093
Methanofollis liminatans	0	0	5	65660	3.92561	65660	0.425434	0	0	0	0	0	0	0	0	0	0	0	0	0	0	0	0	2	935	0.112879	935	0.0399011	0	0	5	830	0.09891	830	0.0418996
Methanolacinia paynteri	0	0	0	0	0	0	0	0	0	2	1858	0.330282	1858	0.0646945	0	0	0	0	0	0	0	0	0	3	2100	0.253526	2100	0.0896174	0	0	5	3028	0.360843	3028	0.152858
Methanomicrobium mobile	0	0	0	0	0	0	0	0	0	0	0	0	0	0	0	0	0	0	0	0	0	0	0	0	0	0	0	0	0	0	0	0	0	0	0
Methanoplanus limicola	0	0	6	3271	0.195563	3271	0.021194	0	0	0	0	0	0	0	0	0	0	0	0	0	0	0	0	2	1105	0.133403	1105	0.0471558	0	0	6	4496	0.535782	4496	0.226964
Methanoregula formicica	0	0	0	0	0	0	0	0	0	0	0	0	0	0	0	0	0	0	0	0	0	0	0	2	1453	0.175416	1453	0.0620067	0	0	11	9176	1.09349	9176	0.463217
Methanospirillum hungatei	0	0	122	10799	0.64564	10799	0.0699705	0	0	0	0	0	0	0	0	0	0	0	0	0	0	0	0	0	0	0	0	0	6093	0.53364	168	19427	2.31509	25520	1.28829
Methanospirillum lacunae	0	0	6	6022	0.360037	6022	0.0390187	0	0	2	796	0.141499	796	0.0277163	0	0	3	1133	0.291861	1133	0.0446349	0	0	2	4715	0.569227	4715	0.201212	0	0	9	6253	0.745161	6253	0.31566
Methanospirillum stamsii	0	0	20	10353	0.618975	10353	0.0670807	0	0	3	1370	0.243534	1370	0.0477026	0	0	7	1939	0.499486	1939	0.0763876	0	0	0	0	0	0	0	0	0	28	7096	0.845621	7096	0.358216
Methanomicrobiales archaeon 53_19	0	0	8	5946	0.355493	5946	0.0385262	0	0	5	693	0.123189	693	0.0241299	0	0	2	1510	0.388976	1510	0.059487	0	0	0	0	0	0	0	0	0	5	3876	0.461898	3876	0.195666
Methanomicrobiales archaeon HGW-Methanomicrobiales-2	0	0	29	46599	2.78601	46599	0.301931	0	0	18	8219	1.46103	8219	0.286181	0	0	19	17870	4.60331	17870	0.703995	2409	0.159012	12	27114	3.27338	29523	1.25989	1836	0.160801	21	28417	3.38642	30253	1.52721
Methanomicrobiales archaeon HGW-Methanomicrobiales-4	0	0	0	0	0	0	0	0	0	0	0	0	0	0	0	0	0	0	0	0	0	0	0	0	0	0	0	0	0	0	4	324	0.0386106	324	0.016356
Methanomicrobiales archaeon HGW-Methanomicrobiales-6	0	0	31	52369	3.13098	52369	0.339317	1704	0.0737851	16	8647	1.53711	10351	0.360416	1669	0.0776217	20	11643	2.99923	13312	0.524431	2229	0.147131	15	44845	5.41399	47074	2.00888	0	0	23	44375	5.28811	44375	2.24011
Methanosaeta harundinacea	21620	0.15711	9	88425	5.28666	110045	0.71302	4276	0.185156	15	35891	6.38006	40167	1.39859	4105	0.190915	5	11460	2.95209	15565	0.613189	2263	0.149375	4	7191	0.868146	9454	0.403449	1631	0.142847	13	7805	0.930111	9436	0.476342
Methanosaeta sp. ASM2	0	0	0	0	0	0	0	0	0	0	0	0	0	0	0	0	0	0	0	0	0	0	0	0	0	0	0	0	0	0	0	0	0	0	0
Methanosaeta sp. NSM2	0	0	0	0	0	0	0	0	0	2	9821	1.7458	9821	0.341962	0	0	0	0	0	0	0	0	0	0	0	0	0	0	0	0	0	0	0	0	0
Methanosaeta sp. NSP1	12177	0.088489	0	0	0	12177	0.0788991	2346	0.101584	5	13541	2.40707	15887	0.553177	2127	0.0989224	0	0	0	2127	0.0837939	0	0	0	0	0	0	0	0	0	0	0	0	0	0
Methanothrix soehngenii	12209816	88.7274	26	115918	6.93039	12325734	79.8628	2257972	97.7728	16	29947	5.32344	2287919	79.6641	2091850	97.2876	15	12798	3.29676	2104648	82.9134	1149053	75.8462	9	4164	0.502706	1153217	49.2135	762140	66.7501	19	13013	1.55074	775153	39.1308
Methanothrix thermoacetophila	0	0	0	0	0	0	0	0	0	0	0	0	0	0	0	0	0	0	0	0	0	0	0	0	0	0	0	0	0	0	0	0	0	0	0
Methanococcoides burtonii	0	0	0	0	0	0	0	0	0	0	0	0	0	0	0	0	0	0	0	0	0	0	0	0	0	0	0	0	0	0	0	0	0	0	0
Methanococcoides vulcani	0	0	0	0	0	0	0	0	0	2	69	0.0122656	69	0.00240254	0	0	0	0	0	0	0	0	0	0	0	0	0	0	0	0	0	0	0	0	0
Methanosarcina acetivorans	0	0	0	0	0	0	0	0	0	0	0	0	0	0	0	0	0	0	0	0	0	0	0	3	422	0.0509467	422	0.0180088	3814	0.33404	0	0	0	3814	0.192536
Methanosarcina flavescens	0	0	0	0	0	0	0	0	0	0	0	0	0	0	0	0	0	0	0	0	0	0	0	0	0	0	0	0	0	0	0	0	0	0	0
Methanosarcina horonobensis	0	0	0	0	0	0	0	0	0	2	3593	0.638699	3593	0.125106	0	0	0	0	0	0	0	0	0	0	0	0	0	0	3641	0.318888	0	0	0	3641	0.183803
Methanosarcina lacustris	0	0	0	0	0	0	0	0	0	0	0	0	0	0	0	0	0	0	0	0	0	0	0	0	0	0	0	0	0	0	0	0	0	0	0
Methanosarcina mazei	0	0	4	3945	0.23586	3945	0.025561	10624	0.460031	3	2174	0.386455	12798	0.445619	0	0	3	553	0.142453	553	0.0217856	2776	0.183237	3	1524	0.183988	4300	0.183502	275552	24.1335	62	41853	4.98756	317405	16.023
Methanosarcina siciliae	0	0	0	0	0	0	0	0	0	0	0	0	0	0	0	0	3	100	0.02576	100	0.00393954	0	0	4	394	0.0475663	394	0.0168139	2109	0.184711	0	0	0	2109	0.106465
Methanosarcina sp. 1.H.A.2.2	0	0	0	0	0	0	0	0	0	0	0	0	0	0	0	0	0	0	0	0	0	0	0	0	0	0	0	0	0	0	0	0	0	0	0
Methanosarcina sp. WWM596	0	0	0	0	0	0	0	0	0	0	0	0	0	0	0	0	0	0	0	0	0	0	0	0	0	0	0	0	0	0	0	0	0	0	0
Methanosarcina spelaei	0	0	0	0	0	0	0	0	0	0	0	0	0	0	0	0	0	0	0	0	0	0	0	0	0	0	0	0	0	0	0	0	0	0	0
Candidatus Syntrophoarchaeum caldarius	0	0	0	0	0	0	0	0	0	0	0	0	0	0	0	0	0	0	0	0	0	0	0	0	0	0	0	0	0	0	0	0	0	0	0
Arc I group archaeon U1lsi0528_Bin089	0	0	0	0	0	0	0	0	0	0	0	0	0	0	0	0	0	0	0	0	0	0	0	0	0	0	0	0	0	0	0	0	0	0	0
unclassified Candidatus Altiarchaeales	0	0	0	0	0	0	0	0	0	0	0	0	0	0	0	0	2	73	0.0188048	73	0.00287586	0	0	0	0	0	0	0	0	0	0	0	0	0	0
Pezizomycotina	0	0	0	0	0	0	0	0	0	0	0	0	0	0	1649	0.0766916	0	0	0	1649	0.0649629	0	0	0	0	0	0	0	0	0	0	0	0	0	0
Arthropoda	0	0	0	0	0	0	0	0	0	0	0	0	0	0	0	0	0	0	0	0	0	0	0	2	228	0.0275257	228	0.00972989	0	0	0	0	0	0	0
Medicago truncatula	0	0	0	0	0	0	0	0	0	2	21872	3.88801	21872	0.761571	0	0	0	0	0	0	0	0	0	0	0	0	0	0	0	0	0	0	0	0	0
Poaceae	0	0	0	0	0	0	0	0	0	0	0	0	0	0	0	0	0	0	0	0	0	0	0	0	0	0	0	0	0	0	0	0	0	0	0
environmental samples <viruses>	0	0	0	0	0	0	0	0	0	2	165	0.0293307	165	0.00574521	0	0	3	2147	0.553067	2147	0.0845818	0	0	0	0	0	0	0	0	0	0	0	0	0	0
ANMV-1 virus	0	0	0	0	0	0	0	0	0	0	0	0	0	0	0	0	0	0	0	0	0	0	0	0	0	0	0	0	0	0	0	0	0	0	0
Not assigned	1294	0.00940336	301	95918	5.73465	97212	0.629871	200	0.00866023	10	720	0.127989	920	0.0320339	184	0.00855746	12	953	0.245493	1137	0.0447925	848	0.0559744	91	193295	23.3359	194143	8.28504	209	0.0183047	233	12529	1.49306	12738	0.643032
sum	13761040	100	2052	1672605	100	15433645	100	2309408	100	1107	562550	100	2871958	100	2150171	100	991	388199	100	2538370	100	1514978	100	1207	828317	100	2343295	100	1141781	100	1586	839147	100	1980928	100
	Relation bacteria:archaea						Whole community composition (Phyla)						Whole community composition (Genera)						Bacteria community only (Genera)
	R-1	R-2	R-3	R-4	R-5		R-1	R-2	R-3	R-4	R-5		R-1	R-2	R-3	R-4	R-5		R-1	R-2	R-3	R-4	R-5
Not assigned	0.378946	0.0130014	0.022995	3.5241	0.195932	Not assigned	0.394554	0.0135422	0.0240171	3.68245	0.207342	Not assigned	0.49723	0.0244391	0.0343103	5.77587	0.31766	Not assigned	3.13511	0.133256	0.242968	17.8909	1.40222
Other	0.356715	0.351477	0.392109	0.134108	0.0951819	Other	0.844152	1.64067	1.27008	0.343828	0.249077	Other	3.13113	5.24668	3.79797	10.9086	5.12381	Other (<5% rel. ab.)	15.0042	26.609	22.7924	28.8546	13.3255
Bacteria	25.5016	23.8405	28.1185	31.9105	34.5854
Archaea	73.7628	75.795	71.4664	64.4313	65.1235	Elusimicrobia	0.610944	3.88539	0.387041	0	1.86281	Candidatus Cloacimonas	0.266338	0.0633292	0.0985252	4.69899	0.862281	Candidatus Cloacimonas	1.6793	0.345306	0.697706	14.5552	3.80629
						Bacteroidetes	6.6193	2.94766	9.77617	2.07934	5.55652	Corynebacterium	0	0	0	0	2.84994	Corynebacterium	0	0	0	0	12.5802
						Candidatus Cloacimonetes	1.62403	0.48652	0.581375	3.55112	4.31136	Desulfovibrio	0.0857206	3.25843	0.804708	0.543662	0.185364	Desulfovibrio	0.540482	17.7668	5.69854	1.68401	0.818237
						Proteobacteria	1.75	4.3817	3.63461	3.66005	3.85031	Endomicrobium	0.378886	3.50994	0.341745	0	1.5899	Endomicrobium	2.38894	19.1381	2.42007	0	7.01814
						Spirochaetes	0.798825	0.0573632	0.0561456	2.09049	3.37762	Mesotoga	0.430675	0.00523316	0.133258	3.73263	0.583749	Mesotoga	2.71547	0.0285341	0.943666	11.5619	2.57679
						Synergistetes	0.142205	0.250944	1.59884	2.12727	2.55346	Syntrophobacter	0.509367	0.76189	0.905044	1.66211	1.46027	Syntrophobacter	3.21164	4.15425	6.40907	5.14841	6.44594
						Actinobacteria	0.245567	0.223815	0.28941	0.631606	2.45146	Syntrophomonas	7.77092	1.1267	0.913312	5.52067	1.63945	Syntrophomonas	48.9969	6.14338	6.46762	17.1004	7.23687
						Firmicutes	10.1611	7.37833	8.07404	12.6985	6.76704	unclassified Bacteroidetes	2.1929	1.84255	4.72936	1.36844	2.79206	unclassified Bacteroidetes	13.8266	10.0466	33.491	4.23876	12.3247
						Thermotogae	0.394538	0.0499738	0.104454	2.57811	0.450641	unclassified Candidatus Cloacimonetes	0.499813	0.26891	0.207371	0.271385	1.27289	unclassified Candidatus Cloacimonetes	3.1514	1.46625	1.4685	0.84062	5.61879
						Euryarchaeota	76.4148	78.6841	74.2038	66.5573	68.3624	unclassified Elusimicrobia	0.0801403	1.10244	0.0626457	0	0.184915	unclassified Elusimicrobia	0.505297	6.01114	0.443626	0	0.816255
												unclassified Parcubacteria	0.600019	1.38392	1.15795	0.011692	0.014065	unclassified Parcubacteria	3.78321	7.54589	8.20002	0.0362162	0.062086
												unclassified Spirochaetes	0.604914	0.0315052	0.0267964	2.29612	2.99012	unclassified Spirochaetes	3.81408	0.171784	0.189759	7.11228	13.199
												unclassified Synergistales	0.0606627	0.105088	1.522	2.86281	3.21034	unclassified Synergistales	0.382488	0.572999	10.778	8.86761	14.1711
												Methanoculleus	6.45243	5.25287	7.47778	20.1354	16.1764
												Methanosarcina	0.75475	1.5997	1.02001	2.74568	31.7458
												Methanospirillum	0.269284	0.20914	0.184044	0.25294	1.70838
												Methanothrix	75.2752	73.5483	75.3946	40.6137	23.3983
												unclassified Methanomicrobiales	0.636846	0.683339	1.22292	2.37517	2.21195

## Sheet: B.2.2 - Functional potential
Note: Expected reads were annotated and counted directly. Unexpected reads were analysed using assembly and binning additional. Thus, final generated contigs were annotated and re-calculated into read counts. Finally both kinds of read counts were summarised to calculate the whole potential function. Additional note: Per contig only one function were identified. That means not all included reads …
		R-1							R-2							R-3							R-4							R-5
		expected read counts		unexpected read counts			total composition		expected read counts		unexpected read counts			total composition		expected read counts		unexpected read counts			total composition		expected read counts		unexpected read counts			total composition		expected read counts		unexpected read counts			total composition
	all leaves/L1-eggnog	expected read counts	rel.ab	unexpected contig counts	unexpected read counts	rel.ab	total read counts	total rel.ab	expected read counts	rel.ab	unexpected contig counts	unexpected read counts	rel.ab	total read counts	total rel.ab	expected read counts	rel.ab	unexpected contig counts	unexpected read counts	rel.ab	total read counts	total rel.ab	expected read counts	rel.ab	unexpected contig counts	unexpected read counts	rel.ab	total read counts	total rel.ab	expected read counts	rel.ab	unexpected contig counts	unexpected read counts	rel.ab	total read counts	total rel.ab
	informationStorageAndProcessing	3507244	18.8713	809	1321415	16.585	4828659	18.1853	620725	18.9233	360	365488	9.18574	986213	13.5859	590665	18.5983	336	279982	14.4413	870647	17.0225	511985	17.6493	484	371483	13.4246	883468	15.5868	549278	17.3204	769	414504	11.7098	963782	14.361
	cellularProcessesAndSignaling	2317953	12.4721	841	965251	12.1148	3283204	12.3649	394280	12.0199	443	234274	5.88796	628554	8.65887	376957	11.8693	435	190971	9.85016	567928	11.1039	367072	12.6538	543	383922	13.8741	750994	13.2496	437040	13.7812	755	352639	9.96207	789679	11.7668
	metabolism	5826452	31.3502	1568	1024856	12.8629	6851308	25.8028	1033001	31.4919	757	415388	10.4399	1448389	19.9528	999325	31.4658	734	330596	17.0519	1329921	26.0021	902399	31.1078	909	456046	16.4805	1358445	23.9666	1000477	31.548	1388	496056	14.0136	1496533	22.2994
	Not assigned	6933433	37.3064	5016	4655985	58.4372	11589418	43.647	1232209	37.5649	3337	2963713	74.4864	4195922	57.8024	1208961	38.0666	2826	1137212	58.6566	2346173	45.8715	1119425	38.5891	2883	1555737	56.2209	2675162	47.1971	1184490	37.3505	5317	2276617	64.3146	3461107	51.5729
	sum	18585082	100	8234	7967507	100	26552589	100	3280215	100	4897	3978863	100	7259078	100	3175908	100	4331	1938761	100	5114669	100	2900881	100	4819	2767188	100	5668069	100	3171285	100	8229	3539816	100	6711101	100
	all leaves/L2-eggnog	expected read counts	rel.ab	unexpected contig counts	unexpected read counts	rel.ab	total read counts	total rel.ab	expected read counts	rel.ab	unexpected contig counts	unexpected read counts	rel.ab	total read counts	total rel.ab	expected read counts	rel.ab	unexpected contig counts	unexpected read counts	rel.ab	total read counts	total rel.ab	expected read counts	rel.ab	unexpected contig counts	unexpected read counts	rel.ab	total read counts	total rel.ab	expected read counts	rel.ab	unexpected contig counts	unexpected read counts	rel.ab	total read counts	total rel.ab
	[A] RNA processing and modification	9990	0.0537528	1	713	0.00891766	10703	0.0402664	1880	0.0573133	0	0	0	1880	0.0258646	1814	0.0571175	1	82	0.00420368	1896	0.0369837	1298	0.044745	0	0	0	1298	0.0228501	1369	0.0431686	0	0	0	1369	0.0203598
	[B] Chromatin structure and dynamics	51144	0.275188	3	735	0.00919282	51879	0.195177	9017	0.274891	2	268	0.00671949	9285	0.127741	8700	0.273937	1	59	0.0030246	8759	0.170855	6497	0.223966	2	172	0.00618792	6669	0.117402	5880	0.185414	5	809	0.0227712	6689	0.0994792
	[J] Translation, ribosomal structure and biogenesis	1002852	5.39601	254	129590	1.62081	1132442	4.26043	174680	5.32526	108	77942	1.95422	252622	3.47552	171732	5.40734	94	48917	2.5077	220649	4.30402	167712	5.78142	111	57315	2.06198	225027	3.9614	172126	5.42764	253	99465	2.79967	271591	4.03912
	[K] Transcription	525266	2.82628	157	99337	1.24243	624603	2.34986	89852	2.73921	68	37483	0.939801	127335	1.75185	86660	2.72867	61	28257	1.44858	114917	2.24159	83558	2.88044	96	65857	2.36929	149415	2.63032	89707	2.82873	122	64182	1.80655	153889	2.28865
	[L] Replication, recombination and repair	1917992	10.3201	394	1092257	13.6611	3010249	11.325	345296	10.5266	182	249795	6.26304	595091	8.18713	321759	10.1312	179	202667	10.3896	524426	10.2295	252920	8.71873	275	248225	8.93021	501145	8.82221	280196	8.83541	389	250136	7.04066	530332	7.88713
	[D] Cell cycle control, cell division, chromosome partitioning	142127	0.764737	45	26203	0.327727	168330	0.633285	22783	0.694558	25	15810	0.3964	38593	0.530954	22083	0.695329	21	6940	0.355775	29023	0.566128	22858	0.787968	31	15449	0.555797	38307	0.674361	21310	0.671967	44	16815	0.473297	38125	0.566997
	[M] Cell wall/membrane/envelope biogenesis	618278	3.32674	226	406792	5.08785	1025070	3.85648	105232	3.20808	135	92494	2.31908	197726	2.72027	101045	3.18161	122	84334	4.32333	185379	3.61604	97298	3.35408	159	123686	4.44976	220984	3.89023	109424	3.45046	191	103168	2.9039	212592	3.16168
	[N] Cell motility	41028	0.220758	28	20528	0.256749	61556	0.231584	2940	0.0896283	7	1259	0.0315666	4199	0.0577689	2784	0.08766	14	4113	0.21085	6897	0.134534	6839	0.235756	18	5537	0.199201	12376	0.217868	8563	0.270017	22	5128	0.144339	13691	0.203613
	[O] Posttranslational modification, protein turnover, chaperones	671100	3.61096	185	167793	2.09863	838893	3.15605	120677	3.67894	95	47859	1.19996	168536	2.31868	114430	3.60306	88	29318	1.50297	143748	2.80397	103681	3.57412	106	84263	3.03147	187944	3.30859	117729	3.71234	161	89104	2.50804	206833	3.07603
	[T] Signal transduction mechanisms	384455	2.06862	187	109850	1.37392	494305	1.85966	63382	1.93225	102	21816	0.546987	85198	1.17214	60668	1.91026	100	32118	1.64651	92786	1.8099	66306	2.28572	129	92372	3.3232	158678	2.79338	91111	2.873	162	49819	1.40227	140930	2.09592
	[U] Intracellular trafficking, secretion, and vesicular transport	102214	0.549979	65	34397	0.430212	136611	0.513953	17547	0.534934	27	16534	0.414552	34081	0.468879	17592	0.55392	37	8271	0.424008	25863	0.504488	21335	0.735466	42	13206	0.475102	34541	0.608064	28269	0.891405	68	16949	0.477069	45218	0.672485
	[V] Defense mechanisms	351862	1.89325	105	207665	2.59732	559527	2.10503	60675	1.84973	52	40380	1.01244	101055	1.39029	57384	1.80685	53	29996	1.53773	87380	1.70445	48086	1.65763	58	54286	1.95301	102372	1.80217	59988	1.8916	107	75952	2.13785	135940	2.02171
	[W] Extracellular structures	0	0	0	0	0	0	0	2	6.09716e-05	0	0	0	2	2.75156e-05	0	0	0	0	0	0	0	4	0.000137889	0	0	0	4	7.04164e-05	226	0.00712645	0	0	0	226	0.00336108
	[Z] Cytoskeleton	6889	0.0370674	0	0	0	6889	0.0259175	1042	0.0317662	0	0	0	1042	0.0143356	971	0.0305739	0	0	0	971	0.0189405	665	0.0229241	0	0	0	665	0.0117067	420	0.0132438	0	0	0	420	0.00624626
	[C] Energy production and conversion	1278439	6.87885	358	182513	2.28273	1460952	5.49634	229495	6.99634	189	79272	1.98756	308767	4.24795	221554	6.97608	181	69014	3.53796	290568	5.66787	210058	7.24118	231	105280	3.78758	315338	5.55124	242615	7.65037	321	115806	3.25963	358421	5.33046
	[E] Amino acid transport and metabolism	1150872	6.19245	366	281523	3.52108	1432395	5.3889	203028	6.18947	163	80974	2.03024	284002	3.90724	197611	6.22219	182	74634	3.82606	272245	5.31046	181256	6.24831	213	107904	3.88198	289160	5.0904	209545	6.60757	315	106832	3.00703	316377	4.70518
	[F] Nucleotide transport and metabolism	459647	2.4732	109	40471	0.506181	500118	1.88153	80303	2.4481	61	46103	1.15593	126406	1.73907	79225	2.49456	44	19574	1.00345	98799	1.92719	73455	2.53216	73	26608	0.957256	100063	1.76152	74751	2.35712	126	63945	1.79988	138696	2.06269
	[G] Carbohydrate transport and metabolism	525394	2.82697	218	145583	1.82084	670977	2.52433	92219	2.81137	99	48334	1.21187	140553	1.9337	90247	2.84161	87	46781	2.3982	137028	2.67289	88438	3.04866	116	64803	2.33137	153241	2.69767	97124	3.06261	186	64214	1.80745	161338	2.39943
	[H] Coenzyme transport and metabolism	755569	4.06546	130	103564	1.2953	859133	3.2322	135129	4.11952	58	40459	1.01442	175588	2.4157	131062	4.12676	62	25130	1.28827	156192	3.04671	119570	4.12185	58	37431	1.34663	157001	2.76386	132141	4.1668	112	27144	0.764031	159285	2.3689
	[I] Lipid transport and metabolism	280447	1.50899	126	116152	1.45274	396599	1.49207	43358	1.3218	68	47237	1.18436	90595	1.24639	43158	1.35892	60	38507	1.97404	81665	1.59297	43665	1.50523	70	32326	1.16297	75991	1.33775	39477	1.24483	101	46476	1.30817	85953	1.2783
	[P] Inorganic ion transport and metabolism	1171886	6.30552	206	134913	1.68739	1306799	4.91639	213312	6.50299	96	71172	1.78448	284484	3.91387	201699	6.35091	94	47306	2.42511	249005	4.85714	158236	5.45476	114	73225	2.63436	231461	4.07466	169132	5.33323	188	63024	1.77396	232156	3.45264
	[Q] Secondary metabolites biosynthesis, transport and catabolism	204198	1.09872	55	38804	0.485331	243002	0.914213	36157	1.10228	23	9494	0.23804	45651	0.628057	34769	1.09477	24	17443	0.894204	52212	1.01846	27721	0.955606	34	15929	0.573066	43650	0.768419	35692	1.12547	39	17151	0.482755	52843	0.785884
	Not assigned	6933433	37.3064	5016	4655985	58.2335	11589418	43.6013	1232209	37.5649	3337	2963713	74.3084	4195922	57.7266	1208961	38.0666	2826	1137212	58.2984	2346173	45.7649	1119425	38.5891	2883	1555737	55.9696	2675162	47.0938	1184490	37.3505	5317	2276617	64.0807	3461107	51.4738
	sum	18585082	100	8234	7995368	100	26580450	100	3280215	100	4897	3988398	100	7268613	100	3175908	100	4331	1950673	100	5126581	100	2900881	100	4819	2779611	100	5680492	100	3171285	100	8229	3552736	100	6724021	100
Description	all leaves/L3	expected read counts	rel.ab	unexpected contig counts	unexpected read counts	rel.ab	total read counts	total rel.ab	expected read counts	rel.ab	unexpected contig counts	unexpected read counts	rel.ab	total read counts	total rel.ab	expected read counts	rel.ab	unexpected contig counts	unexpected read counts	rel.ab	total read counts	total rel.ab	expected read counts	rel.ab	unexpected contig counts	unexpected read counts	rel.ab	total read counts	total rel.ab	expected read counts	rel.ab	unexpected contig counts	unexpected read counts	rel.ab	total read counts	total rel.ab
COG0430 Catalyzes the conversion of 3'-phosphate to a 2',3'- cyclic phosphodiester at the end of RNA. The mechanism of action of the enzyme occurs in 3 steps (A) adenylation of the enzyme by ATP	COG0430	7452	0.0406151	0	0	0	7452	0.0283418	1362	0.0420538	0	0	0	1362	0.0188893	1317	0.0419851	1	82	0.00424766	1399	0.0276084	842	0.0293784	0	0	0	842	0.0305977	885	0.028318	0	0	0	885	0.0133025
COG1949 3'-to-5' exoribonuclease specific for small oligoribonucleotides (By similarity)	COG1949	5	2.72511e-05	0	0	0	5	1.90163e-05	2	6.1753e-05	0	0	0	2	2.77376e-05	4	0.000127517	0	0	0	4	7.89375e-05	0	0	0	0	0	0	0	4	0.000127991	0	0	0	4	6.01245e-05
COG2136 u3 small nucleolar ribonucleoprotein	COG2136	2533	0.0138054	1	713	0.00897371	3246	0.0123454	516	0.0159323	0	0	0	516	0.0071563	493	0.0157165	0	0	0	493	0.00972904	456	0.0159104	0	0	0	456	0.0165707	480	0.0153589	0	0	0	480	0.00721494
COG0123 Histone deacetylase	COG0123	38364	0.209092	1	231	0.00290733	38595	0.146786	6679	0.206224	2	268	0.00674771	6947	0.0963465	6523	0.207949	1	59	0.00305624	6582	0.129892	4572	0.159522	1	86	0.00312519	4658	0.169269	3600	0.115192	4	721	0.0204386	4321	0.0649495
COG1243 Histone acetyltransferase	COG1243	10987	0.0598816	2	504	0.00634327	11491	0.0437032	1975	0.0609811	0	0	0	1975	0.0273909	1796	0.0572553	0	0	0	1796	0.0354429	1531	0.0534184	1	86	0.00312519	1617	0.0587607	1802	0.0576599	1	88	0.00249458	1890	0.0284088
COG2036 Core component of nucleosome. Nucleosomes wrap and compact DNA into chromatin, limiting DNA accessibility to the cellular machineries which require DNA as a template. Histones thereby play a central role in transcription regulation, DNA repair, DNA replication and chromosomal stability. DNA accessibility is regulated via a complex set of post-translational modifications of histones, also …	COG2036	1733	0.00944524	0	0	0	1733	0.00659103	356	0.010992	0	0	0	356	0.00493729	356	0.011349	0	0	0	356	0.00702543	391	0.0136424	0	0	0	391	0.0142087	435	0.013919	0	0	0	435	0.00653854
COG5531 SWI SNF related, matrix associated, actin dependent regulator of chromatin, subfamily d, member	COG5531	60	0.000327014	0	0	0	60	0.000228195	7	0.000216135	0	0	0	7	9.70816e-05	25	0.000796984	0	0	0	25	0.000493359	3	0.000104673	0	0	0	3	0.000109018	43	0.0013759	0	0	0	43	0.000646338
COG0008 Catalyzes the attachment of glutamate to tRNA(Glu) in a two-step reaction glutamate is first activated by ATP to form Glu-AMP and then transferred to the acceptor end of tRNA(Glu) (By similarity)	COG0008	13399	0.0730276	12	5780	0.0727462	19179	0.0729426	1901	0.0586962	5	3400	0.0856052	5301	0.0735185	2061	0.0657033	5	6780	0.351209	8841	0.174472	2353	0.0820989	5	3523	0.128024	5876	0.21353	2302	0.0736588	9	2236	0.0633851	4538	0.0682112
COG0009 sua5 ycio yrdc ywlc family protein	COG0009	4618	0.0251691	1	87	0.00109497	4705	0.0178943	784	0.0242072	1	55	0.00138479	839	0.0116359	732	0.0233357	0	0	0	732	0.0144456	818	0.028541	2	175	0.00635939	993	0.036085	935	0.0299179	0	0	0	935	0.0140541
COG0012 gtp-binding protein	COG0012	7149	0.0389637	5	1541	0.0193948	8690	0.0330503	1183	0.0365269	2	1125	0.0283253	2308	0.0320092	1181	0.0376495	1	78	0.00404045	1259	0.0248456	1337	0.0466495	0	0	0	1337	0.0485857	1423	0.0455328	3	442	0.0125296	1865	0.028033
COG0013 Catalyzes the attachment of alanine to tRNA(Ala) in a two-step reaction alanine is first activated by ATP to form Ala- AMP and then transferred to the acceptor end of tRNA(Ala). Also edits incorrectly charged Ser-tRNA(Ala) and Gly-tRNA(Ala) via its editing domain (By similarity)	COG0013	18687	0.101848	9	6858	0.0863137	25545	0.097154	3053	0.0942659	5	4188	0.105445	7241	0.100424	3121	0.0994954	4	4426	0.22927	7547	0.148935	3349	0.116851	4	3649	0.132602	6998	0.254303	3545	0.113432	8	4175	0.118351	7720	0.11604
COG0016 phenylalanyL-tRNA synthetase, alpha subunit	COG0016	10873	0.0592603	2	398	0.00500917	11271	0.0428664	1837	0.0567201	0	0	0	1837	0.025477	1875	0.0597738	1	44	0.00227923	1919	0.0378702	1769	0.0617225	0	0	0	1769	0.0642843	1683	0.0538522	6	781	0.0221394	2464	0.0370367
COG0017 asparaginyl-tRNA synthetase	COG0017	10659	0.058094	5	4528	0.0569887	15187	0.05776	2024	0.062494	1	168	0.00422991	2192	0.0304004	2009	0.0640456	1	140	0.0072521	2149	0.0424091	1867	0.0651418	4	665	0.0241657	2532	0.0920113	1927	0.0616596	2	1466	0.0415575	3393	0.0510006
COG0018 arginyL-tRNA synthetase	COG0018	14054	0.0765975	2	1063	0.0133788	15117	0.0574937	2297	0.0709233	3	3642	0.0916983	5939	0.0823668	2244	0.0715373	2	455	0.0235693	2699	0.053263	2272	0.0792727	3	712	0.0258736	2984	0.108437	2387	0.0763786	6	6922	0.196222	9309	0.139925
COG0023 translation initiation factor	COG0023	3403	0.0185471	0	0	0	3403	0.0129425	652	0.0201315	0	0	0	652	0.00904246	700	0.0223155	0	0	0	700	0.0138141	577	0.0201322	0	0	0	577	0.0209678	570	0.0182387	0	0	0	570	0.00856774
COG0024 Removes the N-terminal methionine from nascent proteins (By similarity)	COG0024	8510	0.0463814	2	233	0.0029325	8743	0.0332518	1328	0.041004	0	0	0	1328	0.0184178	1291	0.0411562	0	0	0	1291	0.0254771	1067	0.0372289	0	0	0	1067	0.0387741	1003	0.0320937	2	54	0.00153077	1057	0.0158879
COG0030 Specifically dimethylates two adjacent adenosines (A1518 and A1519) in the loop of a conserved hairpin near the 3'-end of 16S rRNA in the 30S particle. May play a critical role in biogenesis of 30S subunits (By similarity)	COG0030	5880	0.0320473	1	121	0.00152289	6001	0.0228233	1005	0.0310309	0	0	0	1005	0.0139381	984	0.0313693	4	249	0.0128984	1233	0.0243325	974	0.033984	0	0	0	974	0.0353945	954	0.0305258	0	0	0	954	0.0143397
COG0042 Catalyzes the synthesis of dihydrouridine a modified base found in the D-loop of most tRNAs (By similarity)	COG0042	589	0.00321018	2	350	0.00440505	939	0.00357125	27	0.000833665	2	272	0.00684842	299	0.00414677	38	0.00121142	2	117	0.00606068	155	0.00305883	97	0.00338444	1	80	0.00290715	177	0.00643207	396	0.0126711	1	49	0.00138903	445	0.00668885
COG0048 Interacts with and stabilizes bases of the 16S rRNA that are involved in tRNA selection in the A site and with the mRNA backbone. Located at the interface of the 30S and 50S subunits, it traverses the body of the 30S subunit contacting proteins on the other side and probably holding the rRNA structure together. The combined cluster of proteins S8, S12 and S17 appears to hold together the …	COG0048	4284	0.0233488	0	0	0	4284	0.0162931	724	0.0223546	0	0	0	724	0.010041	734	0.0233994	0	0	0	734	0.014485	759	0.0264824	0	0	0	759	0.0275816	870	0.027838	1	104	0.00294814	974	0.0146403
COG0049 One of the primary rRNA binding proteins, it binds directly to 16S rRNA where it nucleates assembly of the head domain of the 30S subunit. Is located at the subunit interface close to the decoding center, probably blocks exit of the E-site tRNA (By similarity)	COG0049	5142	0.0280251	0	0	0	5142	0.0195563	948	0.0292709	0	0	0	948	0.0131476	904	0.0288189	0	0	0	904	0.0178399	899	0.0313672	0	0	0	899	0.0326691	885	0.028318	0	0	0	885	0.0133025
COG0050 This protein promotes the GTP-dependent binding of aminoacyl-tRNA to the A-site of ribosomes during protein biosynthesis (By similarity)	COG0050	3717	0.0202585	7	3252	0.0409292	6969	0.0265049	408	0.0125976	1	1603	0.0403603	2011	0.0278901	434	0.0138356	1	81	0.00419586	515	0.0101632	806	0.0281223	2	786	0.0285627	1592	0.0578523	805	0.0257582	3	176	0.00498917	981	0.0147455
COG0051 tRNA binding	COG0051	3328	0.0181384	0	0	0	3328	0.0126572	613	0.0189273	0	0	0	613	0.00850157	627	0.0199884	0	0	0	627	0.0123734	616	0.021493	0	0	0	616	0.022385	582	0.0186227	0	0	0	582	0.00874811
COG0052 30S ribosomal protein S2	COG0052	6320	0.0344454	1	93	0.00117048	6413	0.0243902	1100	0.0339641	0	0	0	1100	0.0152557	1160	0.03698	0	0	0	1160	0.0228919	1156	0.0403342	0	0	0	1156	0.0420083	1190	0.0380773	2	163	0.00462065	1353	0.0203371
COG0060 amino acids such as valine, to avoid such errors it has two additional distinct tRNA(Ile)-dependent editing activities. One activity is designated as 'pretransfer' editing and involves the hydrolysis of activated Val-AMP. The other activity is designated 'posttransfer' editing and involves deacylation of mischarged Val-tRNA(Ile) (By similarity)	COG0060	28874	0.15737	9	6269	0.0789007	35143	0.133658	4913	0.151696	3	10228	0.257521	15141	0.209987	5177	0.165039	3	6603	0.34204	11780	0.232471	4976	0.173618	3	4449	0.161674	9425	0.342498	4712	0.150773	9	5757	0.163197	10469	0.157361
COG0064 Allows the formation of correctly charged Asn-tRNA(Asn) or Gln-tRNA(Gln) through the transamidation of misacylated Asp- tRNA(Asn) or Glu-tRNA(Gln) in organisms which lack either or both of asparaginyl-tRNA or glutaminyl-tRNA synthetases. The reaction takes place in the presence of glutamine and ATP through an activated phospho-Asp-tRNA(Asn) or phospho-Glu-tRNA(Gln) (By similarity)	COG0064	10488	0.057162	2	512	0.00644395	11000	0.0418358	1773	0.054744	1	1327	0.0334112	3100	0.0429933	1825	0.0581798	2	1787	0.0925678	3612	0.0712805	1964	0.0685262	3	1889	0.0686451	3853	0.140016	1993	0.0637715	6	824	0.0233584	2817	0.0423427
COG0072 phenylalanyl-tRNA synthetase (beta subunit)	COG0072	14178	0.0772733	1	331	0.00416592	14509	0.0551814	2262	0.0698426	0	0	0	2262	0.0313712	2355	0.0750759	0	0	0	2355	0.0464744	2104	0.073411	0	0	0	2104	0.076458	2189	0.070043	2	1164	0.0329965	3353	0.0503993
COG0073 Is required not only for elongation of protein synthesis but also for the initiation of all mRNA translation through initiator tRNA(fMet) aminoacylation (By similarity)	COG0073	97	0.000528672	1	228	0.00286957	325	0.00123606	28	0.000864541	1	74	0.00186317	102	0.00141462	55	0.00175336	1	89	0.00461026	144	0.00284175	129	0.00450096	1	157	0.00570528	286	0.0103931	62	0.00198386	4	327	0.00926965	389	0.00584711
COG0080 This protein binds directly to 23S ribosomal RNA (By similarity)	COG0080	4280	0.023327	1	67	0.000843252	4347	0.0165327	861	0.0265847	0	0	0	861	0.011941	838	0.0267149	0	0	0	838	0.0165374	870	0.0303553	0	0	0	870	0.0316152	889	0.028446	0	0	0	889	0.0133627
COG0081 Binds directly to 23S rRNA. The L1 stalk is quite mobile in the ribosome, and is involved in E site tRNA release (By similarity)	COG0081	5765	0.0314206	2	154	0.00193822	5919	0.0225114	992	0.0306295	0	0	0	992	0.0137578	996	0.0317518	1	71	0.00367785	1067	0.0210566	1068	0.0372638	2	112	0.00407001	1180	0.0428804	1014	0.0324457	1	89	0.00252293	1103	0.0165793
COG0087 One of the primary rRNA binding proteins, it binds directly near the 3'-end of the 23S rRNA, where it nucleates assembly of the 50S subunit (By similarity)	COG0087	8433	0.0459618	0	0	0	8433	0.0320728	1587	0.049001	0	0	0	1587	0.0220098	1488	0.0474365	0	0	0	1488	0.0293647	1569	0.0547442	0	0	0	1569	0.0570165	1636	0.0523483	1	144	0.00408205	1780	0.0267554
COG0088 One of the primary rRNA binding proteins, this protein initially binds near the 5'-end of the 23S rRNA. It is important during the early stages of 50S assembly. It makes multiple contacts with different domains of the 23S rRNA in the assembled 50S subunit and ribosome (By similarity)	COG0088	5116	0.0278834	1	237	0.00298285	5353	0.0203588	851	0.0262759	0	0	0	851	0.0118023	842	0.0268424	0	0	0	842	0.0166163	889	0.0310182	0	0	0	889	0.0323057	928	0.0296939	0	0	0	928	0.0139489
COG0089 One of the early assembly proteins it binds 23S rRNA. One of the proteins that surrounds the polypeptide exit tunnel on the outside of the ribosome. Forms the main docking site for trigger factor binding to the ribosome (By similarity)	COG0089	2032	0.0110749	0	0	0	2032	0.00772821	369	0.0113934	0	0	0	369	0.00511759	392	0.0124967	0	0	0	392	0.00773587	380	0.0132586	0	0	0	380	0.013809	419	0.013407	0	0	0	419	0.00629804
COG0090 One of the primary rRNA binding proteins. Required for association of the 30S and 50S subunits to form the 70S ribosome, for tRNA binding and peptide bond formation. It has been suggested to have peptidyltransferase activity	COG0090	6286	0.0342601	6	652	0.00820597	6938	0.026387	1000	0.0308765	2	1246	0.0313718	2246	0.0311493	986	0.031433	2	193	0.00999753	1179	0.0232668	1038	0.036217	3	855	0.0310702	1893	0.0687904	964	0.0308458	4	612	0.0173487	1576	0.023689
COG0091 The globular domain of the protein is located near the polypeptide exit tunnel on the outside of the subunit, while an extended beta-hairpin is found that lines the wall of the exit tunnel in the center of the 70S ribosome (By similarity)	COG0091	4102	0.0223568	0	0	0	4102	0.0156009	748	0.0230956	0	0	0	748	0.0103739	674	0.0214867	0	0	0	674	0.013301	734	0.0256101	0	0	0	734	0.0266731	766	0.0245103	0	0	0	766	0.0115138
COG0092 Binds the lower part of the 30S subunit head. Binds mRNA in the 70S ribosome, positioning it for translation (By similarity)	COG0092	4821	0.0262755	1	126	0.00158582	4947	0.0188147	813	0.0251026	0	0	0	813	0.0112753	875	0.0278944	0	0	0	875	0.0172676	902	0.0314718	0	0	0	902	0.0327781	995	0.0318377	1	131	0.00371353	1126	0.016925
COG0093 Binds to 23S rRNA. Forms part of two intersubunit bridges in the 70S ribosome (By similarity)	COG0093	3774	0.0205692	0	0	0	3774	0.0143535	644	0.0198845	0	0	0	644	0.0089315	661	0.0210722	0	0	0	661	0.0130444	683	0.0238307	1	57	0.00207134	740	0.0268911	675	0.0215985	1	29	0.000822079	704	0.0105819
COG0094 This is 1 of the proteins that binds and probably mediates the attachment of the 5S RNA into the large ribosomal subunit, where it forms part of the central protuberance. In the 70S ribosome it contacts protein S13 of the 30S subunit (bridge B1b), connecting the 2 subunits	COG0094	3326	0.0181275	4	530	0.0066705	3856	0.0146653	590	0.0182171	0	0	0	590	0.00818259	602	0.0191914	1	54	0.00279724	656	0.0129457	698	0.024354	1	106	0.00385197	804	0.0292168	701	0.0224304	2	166	0.00470569	867	0.013032
COG0096 One of the primary rRNA binding proteins, it binds directly to 16S rRNA central domain where it helps coordinate assembly of the platform of the 30S subunit (By similarity)	COG0096	2745	0.0149609	0	0	0	2745	0.0104399	630	0.0194522	0	0	0	630	0.00873734	556	0.0177249	1	60	0.00310804	616	0.0121564	601	0.0209696	0	0	0	601	0.02184	687	0.0219824	0	0	0	687	0.0103264
COG0097 This protein binds to the 23S rRNA, and is important in its secondary structure. It is located near the subunit interface in the base of the L7 L12 stalk, and near the tRNA binding site of the peptidyltransferase center (By similarity)	COG0097	4777	0.0260357	0	0	0	4777	0.0181681	857	0.0264611	1	50	0.0012589	907	0.012579	809	0.0257904	0	0	0	809	0.0159651	786	0.0274245	0	0	0	786	0.0285627	786	0.0251502	1	42	0.0011906	828	0.0124458
COG0098 Located at the back of the 30S subunit body where it stabilizes the conformation of the head with respect to the body (By similarity)	COG0098	6213	0.0338623	1	36	0.00045309	6249	0.0237665	1097	0.0338715	0	0	0	1097	0.0152141	1034	0.0329632	0	0	0	1034	0.0204053	971	0.0338793	1	72	0.00261643	1043	0.037902	1058	0.0338536	0	0	0	1058	0.0159029
COG0099 Located at the top of the head of the 30S subunit, it contacts several helices of the 16S rRNA. In the 70S ribosome it contacts the 23S rRNA (bridge B1a) and protein L5 of the 50S subunit (bridge B1b), connecting the 2 subunits	COG0099	4334	0.0236213	0	0	0	4334	0.0164833	846	0.0261215	1	33	0.000830874	879	0.0121907	805	0.0256629	0	0	0	805	0.0158862	820	0.0286108	0	0	0	820	0.0297983	793	0.0253742	0	0	0	793	0.0119197
COG0100 Located on the platform of the 30S subunit, it bridges several disparate RNA helices of the 16S rRNA. Forms part of the Shine-Dalgarno cleft in the 70S ribosome (By similarity)	COG0100	3618	0.0197189	0	0	0	3618	0.0137602	588	0.0181554	0	0	0	588	0.00815485	583	0.0185857	0	0	0	583	0.0115051	628	0.0219117	0	0	0	628	0.0228211	627	0.0200626	2	89	0.00252293	716	0.0107623
COG0101 Formation of pseudouridine at positions 38, 39 and 40 in the anticodon stem and loop of transfer RNAs (By similarity)	COG0101	5668	0.0308919	2	1844	0.0232083	7512	0.02857	1015	0.0313396	1	248	0.00624415	1263	0.0175163	913	0.0291058	0	0	0	913	0.0180175	767	0.0267615	0	0	0	767	0.0278723	899	0.028766	3	854	0.0242088	1753	0.0263496
COG0102 This protein is one of the early assembly proteins of the 50S ribosomal subunit, although it is not seen to bind rRNA by itself. It is important during the early stages of 50S assembly (By similarity)	COG0102	3319	0.0180893	0	0	0	3319	0.012623	628	0.0193904	0	0	0	628	0.0087096	591	0.0188407	0	0	0	591	0.011663	623	0.0217372	0	0	0	623	0.0226394	660	0.0211185	1	111	0.00314658	771	0.011589
COG0103 30S ribosomal protein S9	COG0103	3330	0.0181493	0	0	0	3330	0.0126648	639	0.0197301	0	0	0	639	0.00886216	566	0.0180437	0	0	0	566	0.0111696	592	0.0206556	0	0	0	592	0.0215129	564	0.0180467	0	0	0	564	0.00847755
COG0124 Histidyl-trna synthetase	COG0124	11100	0.0604975	1	310	0.00390161	11410	0.0433951	1796	0.0554542	1	80	0.00201424	1876	0.0260179	1785	0.0569046	1	367	0.0190109	2152	0.0424684	1732	0.0604315	2	314	0.0114106	2046	0.0743503	1613	0.0516123	2	198	0.00561281	1811	0.0272214
COG0130 Responsible for synthesis of pseudouridine from uracil- 55 in the psi GC loop of transfer RNAs (By similarity)	COG0130	7592	0.0413781	2	224	0.00281923	7816	0.0297262	1288	0.0397689	2	72	0.00181282	1360	0.0188616	1257	0.0400723	1	40	0.00207203	1297	0.0255955	1132	0.0394968	0	0	0	1132	0.0411362	1216	0.0389092	1	104	0.00294814	1320	0.0198411
COG0143 Is required not only for elongation of protein synthesis but also for the initiation of all mRNA translation through initiator tRNA(fMet) aminoacylation (By similarity)	COG0143	16264	0.0886425	8	6081	0.0765345	22345	0.0849836	2921	0.0901902	3	1338	0.0336882	4259	0.0590672	2910	0.0927689	3	6319	0.327329	9229	0.182128	2870	0.100138	4	2761	0.100333	5631	0.204627	3177	0.101657	6	3777	0.107069	6954	0.104526
COG0144 nOP2 Sun	COG0144	5055	0.0275509	1	592	0.00745082	5647	0.021477	845	0.0260906	1	68	0.0017121	913	0.0126622	802	0.0255672	0	0	0	802	0.015827	566	0.0197484	1	199	0.00723153	765	0.0277996	332	0.0106232	2	211	0.00598133	543	0.0081619
COG0154 Allows the formation of correctly charged Gln-tRNA(Gln) through the transamidation of misacylated Glu-tRNA(Gln) in organisms which lack glutaminyl-tRNA synthetase. The reaction takes place in the presence of glutamine and ATP through an activated gamma-phospho-Glu-tRNA(Gln) (By similarity)	COG0154	10136	0.0552435	6	2796	0.03519	12932	0.0491836	1752	0.0540956	2	243	0.00611826	1995	0.0276682	1714	0.0546412	2	196	0.0101529	1910	0.0376926	1524	0.0531741	1	219	0.00795832	1743	0.0633395	1635	0.0523163	3	1207	0.0342155	2842	0.0427184
COG0162 Catalyzes the attachment of tyrosine to tRNA(Tyr) in a two-step reaction tyrosine is first activated by ATP to form Tyr- AMP and then transferred to the acceptor end of tRNA(Tyr) (By similarity)	COG0162	6868	0.0374322	2	314	0.00395196	7182	0.0273149	1188	0.0366813	2	267	0.00672253	1455	0.0201791	1204	0.0383827	2	306	0.015851	1510	0.0297989	1411	0.0492314	0	0	0	1411	0.0512748	1354	0.0433249	2	390	0.0110555	1744	0.0262143
COG0172 Catalyzes the attachment of serine to tRNA(Ser). Is also able to aminoacylate tRNA(Sec) with serine, to form the misacylated tRNA L-seryl-tRNA(Sec), which will be further converted into selenocysteinyl-tRNA(Sec) (By similarity)	COG0172	13920	0.0758672	4	2324	0.0292495	16244	0.06178	2465	0.0761105	3	3702	0.093209	6167	0.0855289	2523	0.0804316	0	0	0	2523	0.0497898	2408	0.0840179	0	0	0	2408	0.0875052	2292	0.0733388	3	845	0.0239537	3137	0.0471526
COG0173 aspartyl-trna synthetase	COG0173	1217	0.00663293	4	1608	0.020238	2825	0.0107442	21	0.000648406	1	1932	0.0486439	1953	0.0270858	103	0.00328357	3	149	0.0077183	252	0.00497306	361	0.0125957	4	969	0.0352128	1330	0.0483314	169	0.00540762	8	9171	0.259975	9340	0.140391
COG0180 tryptophanyltRNA synthetase	COG0180	11575	0.0630864	4	3317	0.0417473	14892	0.056638	2033	0.0627719	2	794	0.0199913	2827	0.0392071	1911	0.0609214	2	282	0.0146078	2193	0.0432775	1871	0.0652814	1	276	0.0100297	2147	0.0780206	1828	0.0584918	4	519	0.0147124	2347	0.035278
COG0182 Catalyzes the interconversion of methylthioribose-1- phosphate (MTR-1-P) into methylthioribulose-1-phosphate (MTRu-1-P) (By similarity)	COG0182	7091	0.0386476	2	334	0.00420367	7425	0.0282391	1283	0.0396145	1	51	0.00128408	1334	0.018501	1240	0.0395304	0	0	0	1240	0.0244706	1278	0.0445909	0	0	0	1278	0.0464417	1275	0.0407971	2	233	0.00660498	1508	0.0226669
COG0184 Forms an intersubunit bridge (bridge B4) with the 23S rRNA of the 50S subunit in the ribosome (By similarity)	COG0184	4660	0.0253981	0	0	0	4660	0.0177231	827	0.0255349	0	0	0	827	0.0114695	804	0.025631	1	235	0.0121732	1039	0.020504	784	0.0273547	0	0	0	784	0.0284901	852	0.0272621	0	0	0	852	0.0128065
COG0185 Protein S19 forms a complex with S13 that binds strongly to the 16S ribosomal RNA (By similarity)	COG0185	3047	0.0166068	0	0	0	3047	0.0115885	481	0.0148516	0	0	0	481	0.00667089	488	0.0155571	0	0	0	488	0.00963037	590	0.0205858	0	0	0	590	0.0214402	565	0.0180787	0	0	0	565	0.00849258
COG0186 One of the primary rRNA binding proteins, it binds specifically to the 5'-end of 16S ribosomal	COG0186	2936	0.0160019	0	0	0	2936	0.0111663	577	0.0178157	0	0	0	577	0.0080023	594	0.0189363	0	0	0	594	0.0117222	591	0.0206207	0	0	0	591	0.0214766	512	0.0163828	0	0	0	512	0.00769593
COG0189 Responsible for the addition of glutamate residues to the C-terminus of ribosomal protein S6 (By similarity)	COG0189	12528	0.0682804	1	3524	0.0443525	16052	0.0610498	2444	0.0754621	1	651	0.0163909	3095	0.0429239	2189	0.0697839	1	672	0.0348101	2861	0.05646	1585	0.0553025	1	2189	0.0795469	3774	0.137145	1745	0.055836	0	0	0	1745	0.0262293
COG0193 The natural substrate for this enzyme may be peptidyl- tRNAs which drop off the ribosome during protein synthesis (By similarity)	COG0193	445	0.00242535	1	112	0.00140961	557	0.00211841	9	0.000277888	1	100	0.0025178	109	0.0015117	6	0.000191276	0	0	0	6	0.000118406	83	0.00289597	0	0	0	83	0.00301617	13	0.00041597	1	44	0.00124729	57	0.000856774
COG0197 Binds 23S rRNA and is also seen to make contacts with the A and possibly P site tRNAs (By similarity)	COG0197	5082	0.0276981	1	382	0.00480779	5464	0.020781	966	0.0298267	0	0	0	966	0.0133973	844	0.0269062	0	0	0	844	0.0166558	850	0.0296575	0	0	0	850	0.0308885	963	0.0308138	0	0	0	963	0.014475
COG0198 One of the proteins that surrounds the polypeptide exit tunnel on the outside of the subunit (By similarity)	COG0198	3111	0.0169557	0	0	0	3111	0.0118319	531	0.0163954	0	0	0	531	0.00736433	581	0.0185219	0	0	0	581	0.0114657	551	0.019225	0	0	0	551	0.020023	553	0.0176947	0	0	0	553	0.00831221
COG0199 Binds 16S rRNA, required for the assembly of 30S particles and may also be responsible for determining the conformation of the 16S rRNA at the A site (By similarity)	COG0199	1369	0.00746136	0	0	0	1369	0.00520665	265	0.00818227	0	0	0	265	0.00367523	263	0.00838427	0	0	0	263	0.00519014	329	0.0114792	0	0	0	329	0.0119556	275	0.00879937	0	0	0	275	0.00413356
COG0200 Binds to the 23S rRNA (By similarity)	COG0200	2895	0.0157784	0	0	0	2895	0.0110104	533	0.0164572	0	0	0	533	0.00739207	513	0.0163541	0	0	0	513	0.0101237	553	0.0192948	0	0	0	553	0.0200957	572	0.0183027	0	0	0	572	0.0085978
COG0203 50S ribosomal protein l17	COG0203	311	0.00169502	0	0	0	311	0.00118281	5	0.000154382	0	0	0	5	6.9344e-05	13	0.000414432	0	0	0	13	0.000256547	94	0.00327977	0	0	0	94	0.0034159	35	0.00111992	0	0	0	35	0.000526089
COG0211 50S ribosomal protein l27	COG0211	255	0.00138981	1	81	0.00101945	336	0.00127789	4	0.000123506	0	0	0	4	5.54752e-05	8	0.000255035	0	0	0	8	0.000157875	49	0.00170967	0	0	0	49	0.00178063	20	0.000639955	0	0	0	20	0.000300622
COG0215 Cysteinyl-tRNA synthetase	COG0215	1076	0.00586444	5	3064	0.038563	4140	0.0157455	70	0.00216135	3	1430	0.0360046	1500	0.0208032	58	0.001849	3	346	0.017923	404	0.00797268	226	0.0078854	4	773	0.0280903	999	0.036303	648	0.0207345	4	1228	0.0348108	1876	0.0281984
COG0216 Peptide chain release factor 1 directs the termination of translation in response to the peptide chain termination codons UAG and UAA (By similarity)	COG0216	767	0.00418032	2	378	0.00475745	1145	0.00435472	32	0.000988047	1	106	0.00266887	138	0.00191389	52	0.00165773	0	0	0	52	0.00102619	155	0.00540813	0	0	0	155	0.0056326	102	0.00326377	1	84	0.00238119	186	0.00279579
COG0219 Methylates the ribose at the nucleotide 34 wobble position in the two leucyl isoacceptors tRNA(Leu)(CmAA) and tRNA(Leu)(cmnm5UmAA). Catalyzes the methyl transfer from S- adenosyl-L-methionine to the 2'-OH of the wobble nucleotide (By similarity)	COG0219	327	0.00178222	1	146	0.00183753	473	0.00179894	2	6.1753e-05	1	50	0.0012589	52	0.000721177	6	0.000191276	1	61	0.00315984	67	0.0013222	49	0.00170967	1	36	0.00130822	85	0.00308885	12	0.000383973	0	0	0	12	0.000180373
COG0222 Seems to be the binding site for several of the factors involved in protein synthesis and appears to be essential for accurate translation (By similarity)	COG0222	263	0.00143341	0	0	0	263	0.00100026	20	0.00061753	0	0	0	20	0.000277376	24	0.000765104	0	0	0	24	0.000473625	89	0.00310531	0	0	0	89	0.0032342	58	0.00185587	0	0	0	58	0.000871805
COG0223 Modifies the free amino group of the aminoacyl moiety of methionyl-tRNA(fMet). The formyl group appears to play a dual role in the initiator identity of N-formylmethionyl-tRNA by (I) promoting its recognition by IF2 and (II) impairing its binding to EFTu-GTP (By similarity)	COG0223	1349	0.00735236	4	333	0.00419109	1682	0.00639707	5	0.000154382	1	72	0.00181282	77	0.0010679	16	0.00051007	4	513	0.0265738	529	0.0104395	125	0.0043614	0	0	0	125	0.00454242	31	0.00099193	1	52	0.00147407	83	0.00124758
COG0227 50s ribosomal protein L28	COG0227	204	0.00111185	0	0	0	204	0.000775863	7	0.000216135	0	0	0	7	9.70816e-05	21	0.000669466	0	0	0	21	0.000414422	30	0.00104673	0	0	0	30	0.00109018	17	0.000543961	0	0	0	17	0.000255529
COG0228 30s ribosomal protein S16	COG0228	240	0.00130805	0	0	0	240	0.00091278	7	0.000216135	0	0	0	7	9.70816e-05	12	0.000382552	0	0	0	12	0.000236812	49	0.00170967	0	0	0	49	0.00178063	10	0.000319977	2	105	0.00297649	115	0.00172858
COG0230 50s ribosomal protein l34	COG0230	104	0.000566824	0	0	0	104	0.000395538	3	9.26294e-05	0	0	0	3	4.16064e-05	6	0.000191276	0	0	0	6	0.000118406	24	0.000837388	0	0	0	24	0.000872145	6	0.000191986	0	0	0	6	9.01867e-05
COG0231 Involved in peptide bond synthesis. Stimulates efficient translation and peptide-bond synthesis on native or reconstituted 70S ribosomes in vitro. Probably functions indirectly by altering the affinity of the ribosome for aminoacyl-tRNA, thus increasing their reactivity as acceptors for peptidyl transferase (By similarity)	COG0231	3631	0.0197898	1	113	0.0014222	3744	0.0142394	588	0.0181554	0	0	0	588	0.00815485	604	0.0192551	0	0	0	604	0.0119196	578	0.0201671	1	81	0.00294349	659	0.0239476	698	0.0223344	0	0	0	698	0.0104917
COG0233 Responsible for the release of ribosomes from messenger RNA at the termination of protein biosynthesis. May increase the efficiency of translation by recycling ribosomes from one round of translation to another (By similarity)	COG0233	515	0.00280687	0	0	0	515	0.00195867	15	0.000463147	0	0	0	15	0.000208032	31	0.00098826	0	0	0	31	0.000611765	59	0.00205858	0	0	0	59	0.00214402	35	0.00111992	0	0	0	35	0.000526089
COG0238 Binds as a heterodimer with protein S6 to the central domain of the 16S rRNA, where it helps stabilize the platform of the 30S subunit (By similarity)	COG0238	201	0.0010955	0	0	0	201	0.000764453	9	0.000277888	0	0	0	9	0.000124819	9	0.000286914	0	0	0	9	0.000177609	46	0.00160499	0	0	0	46	0.00167161	23	0.000735948	0	0	0	23	0.000345716
COG0242 Removes the formyl group from the N-terminal Met of newly synthesized proteins. Requires at least a dipeptide for an efficient rate of reaction. N-terminal L-methionine is a prerequisite for activity but the enzyme has broad specificity at other positions (By similarity)	COG0242	388	0.00211469	0	0	0	388	0.00147566	8	0.000247012	0	0	0	8	0.00011095	12	0.000382552	0	0	0	12	0.000236812	78	0.00272151	0	0	0	78	0.00283447	25	0.000799943	0	0	0	25	0.000375778
COG0244 50s ribosomal protein L10	COG0244	6411	0.0349414	0	0	0	6411	0.0243826	1187	0.0366504	1	981	0.0246996	2168	0.0300676	1154	0.0367888	0	0	0	1154	0.0227735	988	0.0344725	0	0	0	988	0.0359033	1017	0.0325417	0	0	0	1017	0.0152866
COG0251 Endoribonuclease LPSP	COG0251	63	0.000343364	0	0	0	63	0.000239605	24	0.000741036	0	0	0	24	0.000332851	15	0.00047819	0	0	0	15	0.000296015	35	0.00122119	0	0	0	35	0.00127188	151	0.00483166	0	0	0	151	0.0022697
COG0254 50S ribosomal protein L3-1	COG0254	252	0.00137346	0	0	0	252	0.000958419	5	0.000154382	0	0	0	5	6.9344e-05	13	0.000414432	0	0	0	13	0.000256547	81	0.00282618	0	0	0	81	0.00294349	22	0.00070395	0	0	0	22	0.000330685
COG0255 50s ribosomal protein l29	COG0255	1552	0.00845875	0	0	0	1552	0.00590265	256	0.00790438	0	0	0	256	0.00355041	275	0.00876682	0	0	0	275	0.00542695	282	0.00983931	0	0	0	282	0.0102477	294	0.00940733	0	0	0	294	0.00441915
COG0256 This is one of the proteins that binds and probably mediates the attachment of the 5S RNA into the large ribosomal subunit, where it forms part of the central protuberance (By similarity)	COG0256	4987	0.0271803	0	0	0	4987	0.0189668	865	0.0267082	0	0	0	865	0.0119965	848	0.0270337	0	0	0	848	0.0167347	897	0.0312974	0	0	0	897	0.0325964	912	0.0291819	0	0	0	912	0.0137084
COG0257 50S ribosomal protein L36	COG0257	144	0.000784833	0	0	0	144	0.000547668	5	0.000154382	0	0	0	5	6.9344e-05	11	0.000350673	0	0	0	11	0.000217078	30	0.00104673	0	0	0	30	0.00109018	10	0.000319977	0	0	0	10	0.000150311
COG0261 This protein binds to 23S rRNA in the presence of protein L20 (By similarity)	COG0261	227	0.0012372	0	0	0	227	0.000863338	11	0.000339641	0	0	0	11	0.000152557	17	0.000541949	0	0	0	17	0.000335484	78	0.00272151	0	0	0	78	0.00283447	34	0.00108792	1	51	0.00144572	85	0.00127765
COG0264 Associates with the EF-Tu.GDP complex and induces the exchange of GDP to GTP. It remains bound to the aminoacyl-tRNA.EF- Tu.GTP complex up to the GTP hydrolysis stage on the ribosome (By similarity)	COG0264	479	0.00261066	1	514	0.00646913	993	0.00377663	17	0.0005249	0	0	0	17	0.00023577	50	0.00159397	0	0	0	50	0.000986718	123	0.00429161	1	55	0.00199866	178	0.00646841	36	0.00115192	1	163	0.00462065	199	0.00299119
COG0267 50S ribosomal protein L33	COG0267	182	0.000991941	0	0	0	182	0.000692192	8	0.000247012	0	0	0	8	0.00011095	11	0.000350673	0	0	0	11	0.000217078	65	0.00226793	0	0	0	65	0.00236206	30	0.000959932	0	0	0	30	0.000450934
COG0268 Binds directly to 16S ribosomal RNA (By similarity)	COG0268	204	0.00111185	0	0	0	204	0.000775863	15	0.000463147	0	0	0	15	0.000208032	12	0.000382552	0	0	0	12	0.000236812	25	0.000872279	0	0	0	25	0.000908484	27	0.000863939	0	0	0	27	0.00040584
COG0290 IF-3 binds to the 30S ribosomal subunit and shifts the equilibrum between 70S ribosomes and their 50S and 30S subunits in favor of the free subunits, thus enhancing the availability of 30S subunits on which protein synthesis initiation begins (By similarity)	COG0290	323	0.00176042	1	133	0.00167392	456	0.00173428	16	0.000494024	0	0	0	16	0.000221901	23	0.000733225	1	85	0.00440306	108	0.00213131	88	0.00307042	0	0	0	88	0.00319786	33	0.00105592	1	103	0.0029198	136	0.00204423
COG0291 50s ribosomal protein L35	COG0291	119	0.000648577	0	0	0	119	0.000452587	1	3.08765e-05	0	0	0	1	1.38688e-05	12	0.000382552	0	0	0	12	0.000236812	23	0.000802497	0	0	0	23	0.000835805	9	0.00028798	0	0	0	9	0.00013528
COG0292 Binds directly to 23S ribosomal RNA and is necessary for the in vitro assembly process of the 50S ribosomal subunit. It is not involved in the protein synthesizing functions of that subunit (By similarity)	COG0292	225	0.0012263	0	0	0	225	0.000855731	4	0.000123506	0	0	0	4	5.54752e-05	23	0.000733225	0	0	0	23	0.00045389	53	0.00184923	0	0	0	53	0.00192599	35	0.00111992	1	64	0.00181424	99	0.00148808
COG0293 Specifically methylates the uridine in position 2552 of 23S rRNA at the 2'-O position of the ribose in the fully assembled 50S ribosomal subunit (By similarity)	COG0293	5387	0.0293604	1	510	0.00641878	5897	0.0224278	1108	0.0342111	0	0	0	1108	0.0153666	1030	0.0328357	0	0	0	1030	0.0203264	1003	0.0349958	0	0	0	1003	0.0364484	906	0.0289899	0	0	0	906	0.0136182
COG0324 Catalyzes the transfer of a dimethylallyl group onto the adenine at position 37 in tRNAs that read codons beginning with uridine, leading to the formation of N6-(dimethylallyl)adenosine (i(6)A) (By similarity)	COG0324	643	0.0035045	1	112	0.00140961	755	0.00287145	7	0.000216135	0	0	0	7	9.70816e-05	23	0.000733225	0	0	0	23	0.00045389	86	0.00300064	1	36	0.00130822	122	0.0044334	34	0.00108792	5	296	0.00839087	330	0.00496027
COG0333 50s ribosomal protein l32	COG0333	182	0.000991941	0	0	0	182	0.000692192	0	0	0	0	0	0	0	6	0.000191276	0	0	0	6	0.000118406	29	0.00101184	0	0	0	29	0.00105384	2	6.39955e-05	0	0	0	2	3.00622e-05
COG0335 This protein is located at the 30S-50S ribosomal subunit interface and may play a role in the structure and function of the aminoacyl-tRNA binding site (By similarity)	COG0335	298	0.00162417	0	0	0	298	0.00113337	10	0.000308765	0	0	0	10	0.000138688	10	0.000318793	0	0	0	10	0.000197344	65	0.00226793	0	0	0	65	0.00236206	41	0.00131191	0	0	0	41	0.000616276
COG0336 Specifically methylates guanosine-37 in various tRNAs (By similarity)	COG0336	621	0.00338459	3	721	0.0090744	1342	0.00510396	12	0.000370518	1	2497	0.0628695	2509	0.0347968	32	0.00102014	2	147	0.0076147	179	0.00353245	107	0.00373335	0	0	0	107	0.00388831	22	0.00070395	2	230	0.00651994	252	0.00378784
COG0343 Exchanges the guanine residue with 7-aminomethyl-7- deazaguanine in tRNAs with GU(N) anticodons (tRNA-Asp, -Asn, -His and -Tyr). After this exchange, a cyclopentendiol moiety is attached to the 7-aminomethyl group of 7-deazaguanine, resulting in the hypermodified nucleoside queuosine (Q) (7-(((4,5-cis- dihydroxy-2-cyclopenten-1-yl)amino)methyl)-7-deazaguanosine) (By similarity)	COG0343	17982	0.098006	2	746	0.00938904	18728	0.0712273	3376	0.104239	2	331	0.00833392	3707	0.0514116	2920	0.0930877	1	156	0.00808091	3076	0.0607029	2529	0.0882398	2	409	0.0148628	2938	0.106765	2231	0.0713869	4	715	0.0202685	2946	0.0442817
COG0349 Exonuclease involved in the 3' processing of various precursor tRNAs. Initiates hydrolysis at the 3'-terminus of an RNA molecule and releases 5'-mononucleotides (By similarity)	COG0349	1	5.45023e-06	0	0	0	1	3.80325e-06	0	0	1	43	0.00108265	43	0.000596358	0	0	0	0	0	0	0	0	0	1	79	0.00287081	79	0.00287081	0	0	0	0	0	0	0
COG0359 Binds to the 23S rRNA (By similarity)	COG0359	205	0.0011173	1	107	0.00134669	312	0.00118661	4	0.000123506	0	0	0	4	5.54752e-05	7	0.000223155	0	0	0	7	0.000138141	67	0.00233771	0	0	0	67	0.00243474	19	0.000607957	0	0	0	19	0.000285591
COG0360 Binds together with S18 to 16S ribosomal RNA (By similarity)	COG0360	315	0.00171682	0	0	0	315	0.00119802	0	0	0	0	0	0	0	22	0.000701346	0	0	0	22	0.000434156	49	0.00170967	0	0	0	49	0.00178063	17	0.000543961	0	0	0	17	0.000255529
COG0361 however, it seems to stimulate more or less all the activities of the other two initiation factors, IF-2 and IF-3 (By similarity)	COG0361	2891	0.0157566	0	0	0	2891	0.0109952	564	0.0174143	0	0	0	564	0.007822	547	0.017438	0	0	0	547	0.0107947	642	0.0224001	0	0	0	642	0.0233299	925	0.0295979	1	34	0.000963817	959	0.0144148
COG0423 Catalyzes the attachment of glycine to tRNA(Gly) (By similarity)	COG0423	13411	0.073093	3	2122	0.0267072	15533	0.0590759	2452	0.0757091	0	0	0	2452	0.0340063	2403	0.0766061	0	0	0	2403	0.0474217	2253	0.0786098	2	1004	0.0364847	3257	0.118357	2386	0.0763466	2	3993	0.113192	6379	0.0958835
COG0441 threonine-tRNA ligase activity	COG0441	17110	0.0932534	6	2700	0.0339818	19810	0.0753424	2981	0.0920428	3	3746	0.0943168	6727	0.0932954	2910	0.0927689	2	3068	0.158925	5978	0.117972	3053	0.106523	4	3796	0.137944	6849	0.248888	2880	0.0921535	7	1376	0.0390062	4256	0.0639724
COG0442 Catalyzes the attachment of proline to tRNA(Pro) in a two-step reaction proline is first activated by ATP to form Pro- AMP and then transferred to the acceptor end of tRNA(Pro). As ProRS can inadvertently accommodate and process non-cognate amino acids such as alanine and cysteine, to avoid such errors it has two additional distinct editing activities against alanine. One activity is desi…	COG0442	14106	0.0768809	5	3301	0.0415459	17407	0.0662032	2189	0.0675886	2	1647	0.0414682	3836	0.0532007	2330	0.0742789	2	111	0.00574988	2441	0.0481716	2517	0.0878211	2	261	0.00948457	2778	0.100951	2485	0.0795144	6	774	0.021941	3259	0.0489864
COG0480 Catalyzes the GTP-dependent ribosomal translocation step during translation elongation. During this step, the ribosome changes from the pre-translocational (PRE) to the post- translocational (POST) state as the newly formed A-site-bound peptidyl-tRNA and P-site-bound deacylated tRNA move to the P and E sites, respectively. Catalyzes the coordinated movement of the two tRNA molecules, the …	COG0480	24608	0.134119	13	5685	0.0715505	30293	0.115212	3803	0.117423	5	5532	0.139285	9335	0.129465	3714	0.1184	4	2604	0.134889	6318	0.124682	4103	0.143158	7	5570	0.20241	9673	0.351511	3863	0.123607	9	13673	0.387596	17536	0.263586
COG0482 Catalyzes the 2-thiolation of uridine at the wobble position (U34) of tRNA, leading to the formation of s(2)U34 (By similarity)	COG0482	1148	0.00625686	1	74	0.000931353	1222	0.00464757	17	0.0005249	0	0	0	17	0.00023577	50	0.00159397	2	104	0.00538727	154	0.00303909	261	0.00910659	1	100	0.00363394	361	0.0131185	48	0.00153589	3	266	0.00754045	314	0.00471977
COG0495 Leucyl-trna synthetase	COG0495	25528	0.139133	8	9704	0.122133	35232	0.133996	4475	0.138172	3	6487	0.16333	10962	0.15203	4416	0.140779	3	5191	0.268897	9607	0.189588	4490	0.156661	3	9585	0.348313	14075	0.511477	4600	0.14719	7	11524	0.326677	16124	0.242362
COG0522 One of the primary rRNA binding proteins, it binds directly to 16S rRNA where it nucleates assembly of the body of the 30S subunit (By similarity)	COG0522	4538	0.0247331	2	288	0.00362472	4826	0.0183545	834	0.025751	0	0	0	834	0.0115666	800	0.0255035	1	61	0.00315984	861	0.0169913	850	0.0296575	0	0	0	850	0.0308885	863	0.027614	0	0	0	863	0.0129719
COG0525 amino acids such as threonine, to avoid such errors, it has a posttransfer editing activity that hydrolyzes mischarged Thr-tRNA(Val) in a tRNA-dependent manner (By similarity)	COG0525	21138	0.115207	6	8051	0.101329	29189	0.111013	3554	0.109735	3	3358	0.0845478	6912	0.0958611	3699	0.117922	3	2101	0.108833	5800	0.114459	3438	0.119956	3	526	0.0191145	3964	0.144049	3494	0.1118	9	3350	0.0949643	6844	0.102873
COG0532 One of the essential components for the initiation of protein synthesis. Protects formylmethionyl-tRNA from spontaneous hydrolysis and promotes its binding to the 30S ribosomal subunits. Also involved in the hydrolysis of GTP during the formation of the 70S ribosomal complex (By similarity)	COG0532	16230	0.0884572	7	1478	0.0186019	17708	0.067348	2836	0.0875657	3	1964	0.0494496	4800	0.0665702	2491	0.0794115	1	85	0.00440306	2576	0.0508357	2863	0.0998934	2	368	0.0133729	3231	0.117412	2691	0.0861059	5	2186	0.0619677	4877	0.0733068
COG0539 thus facilitating recognition of the initiation point. It is needed to translate mRNA with a short Shine-Dalgarno (SD) purine-rich sequence (By similarity)	COG0539	163	0.000888387	2	761	0.00957783	924	0.0035142	22	0.000679283	2	132	0.0033235	154	0.00213579	79	0.00251847	0	0	0	79	0.00155901	179	0.00624552	3	2500	0.0908484	2679	0.0973531	114	0.00364774	1	91	0.00257963	205	0.00308138
COG0564 pseudouridine synthase activity	COG0564	742	0.00404407	0	0	0	742	0.00282201	26	0.000802789	4	333	0.00838428	359	0.0049789	43	0.00137081	0	0	0	43	0.000848578	174	0.00607106	0	0	0	174	0.00632305	44	0.0014079	5	556	0.0157612	600	0.00901867
COG0565 RNA methyltransferase TrmH family, group 1	COG0565	5954	0.0324506	0	0	0	5954	0.0226446	1137	0.0351066	0	0	0	1137	0.0157688	1132	0.0360874	0	0	0	1132	0.0223393	1037	0.0361821	0	0	0	1037	0.0376839	786	0.0251502	2	196	0.00555612	982	0.0147606
COG0566 Methyltransferase	COG0566	1013	0.00552108	3	684	0.00860872	1697	0.00645412	12	0.000370518	0	0	0	12	0.000166426	13	0.000414432	0	0	0	13	0.000256547	143	0.00498944	1	195	0.00708618	338	0.0122827	55	0.00175987	1	54	0.00153077	109	0.00163839
COG0590 deaminase	COG0590	11354	0.0618819	0	0	0	11354	0.0431821	1915	0.0591285	0	0	0	1915	0.0265587	1748	0.0557251	0	0	0	1748	0.0344957	1121	0.039113	1	21	0.000763127	1142	0.0414996	1272	0.0407011	1	101	0.0028631	1373	0.0206377
COG0594 RNaseP catalyzes the removal of the 5'-leader sequence from pre-tRNA to produce the mature 5'-terminus. It can also cleave other RNA substrates such as 4.5S RNA. The protein component plays an auxiliary but essential role in vivo by binding to the 5'-leader sequence and broadening the substrate specificity of the ribozyme (By similarity)	COG0594	154	0.000839335	0	0	0	154	0.000585701	0	0	0	0	0	0	0	0	0	0	0	0	0	0	29	0.00101184	0	0	0	29	0.00105384	0	0	0	0	0	0	0
COG0617 Catalyzes the addition and repair of the essential 3'- terminal CCA sequence in tRNAs without using a nucleic acid template. Adds these three nucleotides in the order of C, C, and A to the tRNA nucleotide-73, using CTP and ATP as substrates and producing inorganic pyrophosphate	COG0617	1685	0.00918363	2	721	0.0090744	2406	0.00915062	13	0.000401394	1	1233	0.0310445	1246	0.0172805	36	0.00114766	2	1129	0.058483	1165	0.0229905	152	0.00530346	0	0	0	152	0.00552358	133	0.0042557	4	994	0.0281775	1127	0.0169401
COG0621 Catalyzes the methylthiolation of N6- (dimethylallyl)adenosine (i(6)A), leading to the formation of 2- methylthio-N6-(dimethylallyl)adenosine (ms(2)i(6)A) at position 37 in tRNAs that read codons beginning with uridine (By similarity)	COG0621	11091	0.0604485	6	2089	0.0262918	13180	0.0501268	1596	0.0492789	2	87	0.00219049	1683	0.0233412	1612	0.0513895	3	196	0.0101529	1808	0.0356797	1884	0.065735	1	132	0.0047968	2016	0.0732602	1535	0.0491165	8	479	0.0135785	2014	0.0302727
COG0689 Phosphorolytic exoribonuclease that removes nucleotide residues following the -CCA terminus of tRNA and adds nucleotides to the ends of RNA molecules by using nucleoside diphosphates as substrates (By similarity)	COG0689	5805	0.0316386	1	61	0.000767737	5866	0.0223099	993	0.0306603	0	0	0	993	0.0137717	908	0.0289464	0	0	0	908	0.0179188	570	0.019888	1	470	0.0170795	1040	0.0377929	673	0.0215345	0	0	0	673	0.0101159
COG0721 Allows the formation of correctly charged Asn-tRNA(Asn) or Gln-tRNA(Gln) through the transamidation of misacylated Asp- tRNA(Asn) or Glu-tRNA(Gln) in organisms which lack either or both of asparaginyl-tRNA or glutaminyl-tRNA synthetases. The reaction takes place in the presence of glutamine and ATP through an activated phospho-Asp-tRNA(Asn) or phospho-Glu-tRNA(Gln) (By similarity)	COG0721	2768	0.0150862	0	0	0	2768	0.0105274	462	0.0142649	0	0	0	462	0.00640738	474	0.0151108	0	0	0	474	0.00935409	411	0.0143403	0	0	0	411	0.0149355	443	0.014175	0	0	0	443	0.00665879
COG0751 Glycyl-tRNA synthetase beta subunit	COG0751	1236	0.00673648	2	1082	0.0136179	2318	0.00881594	20	0.00061753	1	2227	0.0560714	2247	0.0311632	54	0.00172148	1	116	0.00600888	170	0.00335484	228	0.00795519	0	0	0	228	0.00828537	82	0.00262381	2	503	0.0142588	585	0.00879321
COG0752 glycyl-tRNA synthetase, alpha subunit	COG0752	855	0.00465994	4	783	0.00985472	1638	0.00622973	39	0.00120418	0	0	0	39	0.000540883	87	0.0027735	0	0	0	87	0.00171689	196	0.00683867	1	42	0.00152625	238	0.00864877	143	0.00457567	1	46	0.00130399	189	0.00284088
COG0806 An accessory protein needed during the final step in the assembly of 30S ribosomal subunit, possibly for assembly of the head region. Probably interacts with S19. Essential for efficient processing of 16S rRNA. May be needed both before and after RbfA during the maturation of 16S rRNA. It has affinity for free ribosomal 30S subunits but not for 70S ribosomes (By similarity)	COG0806	347	0.00189123	0	0	0	347	0.00131973	2	6.1753e-05	0	0	0	2	2.77376e-05	16	0.00051007	0	0	0	16	0.00031575	59	0.00205858	0	0	0	59	0.00214402	12	0.000383973	0	0	0	12	0.000180373
COG0809 Transfers and isomerizes the ribose moiety from AdoMet to the 7-aminomethyl group of 7-deazaguanine (preQ1-tRNA) to give epoxyqueuosine (oQ-tRNA) (By similarity)	COG0809	661	0.0036026	1	116	0.00145996	777	0.00295513	8	0.000247012	0	0	0	8	0.00011095	31	0.00098826	0	0	0	31	0.000611765	144	0.00502433	0	0	0	144	0.00523287	38	0.00121591	2	103	0.0029198	141	0.00211939
COG0820 rRNA (adenine-C2-)-methyltransferase activity	COG0820	708	0.00385876	1	218	0.00274371	926	0.00352181	9	0.000277888	1	144	0.00362563	153	0.00212193	21	0.000669466	0	0	0	21	0.000414422	88	0.00307042	0	0	0	88	0.00319786	36	0.00115192	2	200	0.00566951	236	0.00354734
COG0828 30S ribosomal protein S21	COG0828	130	0.000708529	0	0	0	130	0.000494423	8	0.000247012	0	0	0	8	0.00011095	17	0.000541949	0	0	0	17	0.000335484	25	0.000872279	0	0	0	25	0.000908484	12	0.000383973	0	0	0	12	0.000180373
COG0858 Associates with free 30S ribosomal subunits (but not with 30S subunits that are part of 70S ribosomes or polysomes). Essential for efficient processing of 16S rRNA. May interact with the 5'-terminal helix region of 16S rRNA (By similarity)	COG0858	315	0.00171682	0	0	0	315	0.00119802	4	0.000123506	0	0	0	4	5.54752e-05	20	0.000637587	0	0	0	20	0.000394687	63	0.00219814	0	0	0	63	0.00228938	9	0.00028798	0	0	0	9	0.00013528
COG1093 translation initiation factor	COG1093	7929	0.0432148	0	0	0	7929	0.030156	1548	0.0477968	0	0	0	1548	0.0214689	1527	0.0486798	0	0	0	1527	0.0301344	1367	0.0476962	0	0	0	1367	0.0496759	1224	0.0391652	0	0	0	1224	0.0183981
COG1096 Exosome complex	COG1096	3684	0.0200786	0	0	0	3684	0.0140112	757	0.0233735	0	0	0	757	0.0104987	653	0.0208172	0	0	0	653	0.0128865	385	0.0134331	0	0	0	385	0.0139907	582	0.0186227	0	0	0	582	0.00874811
COG1097 Exosome complex	COG1097	4468	0.0243516	0	0	0	4468	0.0169929	846	0.0261215	0	0	0	846	0.011733	754	0.024037	0	0	0	754	0.0148797	461	0.0160848	0	0	0	461	0.0167524	581	0.0185907	0	0	0	581	0.00873308
COG1098 RNA binding s1 domain protein	COG1098	391	0.00213104	0	0	0	391	0.00148707	5	0.000154382	0	0	0	5	6.9344e-05	4	0.000127517	0	0	0	4	7.89375e-05	47	0.00163988	0	0	0	47	0.00170795	17	0.000543961	0	0	0	17	0.000255529
COG1184 translation initiation factor	COG1184	5885	0.0320746	1	122	0.00153547	6007	0.0228461	1195	0.0368974	2	1496	0.0376663	2691	0.0373209	1074	0.0342384	0	0	0	1074	0.0211947	1024	0.0357286	1	1111	0.040373	2135	0.0775845	1089	0.0348455	1	1037	0.0293964	2126	0.0319562
COG1185 Involved in mRNA degradation. Hydrolyzes single-stranded polyribonucleotides processively in the 3'- to 5'-direction (By similarity)	COG1185	1462	0.00796823	5	7632	0.0960552	9094	0.0345868	73	0.00225398	2	601	0.015132	674	0.00934757	83	0.00264599	0	0	0	83	0.00163795	343	0.0119677	2	378	0.0137363	721	0.0262007	170	0.00543961	5	1795	0.0508838	1965	0.0295362
COG1186 Peptide chain release factor 2 directs the termination of translation in response to the peptide chain termination codons UGA and UAA (By similarity)	COG1186	838	0.00456729	3	293	0.00368765	1131	0.00430148	25	0.000771912	0	0	0	25	0.00034672	48	0.00153021	1	153	0.00792551	201	0.00396661	173	0.00603617	0	0	0	173	0.00628671	60	0.00191986	1	105	0.00297649	165	0.00248013
COG1187 pseudouridine synthase activity	COG1187	539	0.00293767	0	0	0	539	0.00204995	8	0.000247012	1	91	0.0022912	99	0.00137301	31	0.00098826	1	78	0.00404045	109	0.00215105	115	0.00401248	0	0	0	115	0.00417903	22	0.00070395	1	95	0.00269302	117	0.00175864
COG1188 heat shock protein	COG1188	201	0.0010955	0	0	0	201	0.000764453	0	0	0	0	0	0	0	0	0	0	0	0	0	0	26	0.00090717	0	0	0	26	0.000944823	1	3.19977e-05	0	0	0	1	1.50311e-05
COG1189 hemolysin a	COG1189	536	0.00292132	0	0	0	536	0.00203854	20	0.00061753	0	0	0	20	0.000277376	11	0.000350673	1	141	0.0073039	152	0.00299962	60	0.00209347	0	0	0	60	0.00218036	313	0.0100153	0	0	0	313	0.00470474
COG1190 lysyl-trna synthetase	COG1190	2815	0.0153424	6	3390	0.042666	6205	0.0235992	486	0.015006	2	3636	0.0915472	4122	0.0571672	512	0.0163222	2	1381	0.0715368	1893	0.0373572	1184	0.0413111	4	1278	0.0464417	2462	0.0894675	1587	0.0507804	3	538	0.015251	2125	0.0319411
COG1206 Catalyzes the folate-dependent formation of 5-methyl- uridine at position 54 (M-5-U54) in all tRNAs (By similarity)	COG1206	850	0.00463269	0	0	0	850	0.00323276	5	0.000154382	0	0	0	5	6.9344e-05	19	0.000605708	0	0	0	19	0.000374953	99	0.00345423	1	86	0.00312519	185	0.00672278	16	0.000511964	1	143	0.0040537	159	0.00238995
COG1236 cleavage and polyadenylation	COG1236	16175	0.0881574	4	2346	0.0295264	18521	0.07044	2829	0.0873496	1	41	0.0010323	2870	0.0398034	2665	0.0849585	1	182	0.00942773	2847	0.0561837	1710	0.0596639	2	382	0.0138816	2092	0.0760219	1900	0.0607957	3	346	0.00980825	2246	0.0337599
COG1258 Responsible for synthesis of pseudouridine from uracil- 54 and uracil-55 in the psi GC loop of transfer RNAs (By similarity)	COG1258	7196	0.0392198	0	0	0	7196	0.0273682	1447	0.0446783	0	0	0	1447	0.0200681	1418	0.0452049	0	0	0	1418	0.0279833	1393	0.0486034	0	0	0	1393	0.0506207	1515	0.0484766	1	41	0.00116225	1556	0.0233884
COG1325 exosome subunit	COG1325	1952	0.0106388	0	0	0	1952	0.00742395	330	0.0101892	0	0	0	330	0.0045767	357	0.0113809	0	0	0	357	0.00704517	171	0.00596639	0	0	0	171	0.00621403	294	0.00940733	0	0	0	294	0.00441915
COG1358 (ribosomal) protein	COG1358	3652	0.0199042	0	0	0	3652	0.0138895	674	0.0208107	0	0	0	674	0.00934757	665	0.0211998	0	0	0	665	0.0131234	684	0.0238656	0	0	0	684	0.0248561	558	0.0178547	0	0	0	558	0.00838737
COG1369 Part of ribonuclease P, a protein complex that generates mature tRNA molecules by cleaving their 5'-ends (By similarity)	COG1369	3314	0.018062	0	0	0	3314	0.012604	698	0.0215518	0	0	0	698	0.00968042	701	0.0223474	0	0	0	701	0.0138338	610	0.0212836	0	0	0	610	0.022167	552	0.0176627	0	0	0	552	0.00829718
COG1370 Exchanges the guanine residue with 7-cyano-7- deazaguanine (preQ0) at position 15 in the dihydrouridine loop (D- loop) of archaeal tRNAs (By similarity)	COG1370	4363	0.0237793	0	0	0	4363	0.0165936	862	0.0266155	0	0	0	862	0.0119549	876	0.0279263	0	0	0	876	0.0172873	572	0.0199577	0	0	0	572	0.0207861	565	0.0180787	0	0	0	565	0.00849258
COG1383 Ribosomal protein	COG1383	1754	0.0095597	0	0	0	1754	0.0066709	329	0.0101584	0	0	0	329	0.00456283	323	0.010297	0	0	0	323	0.0063742	321	0.0112001	0	0	0	321	0.0116649	312	0.00998329	0	0	0	312	0.00468971
COG1384 lysyl-tRNA synthetase	COG1384	10544	0.0574672	0	0	0	10544	0.0401015	1728	0.0533546	0	0	0	1728	0.0239653	1716	0.054705	0	0	0	1716	0.0338642	951	0.0331815	0	0	0	951	0.0345587	1310	0.041917	0	0	0	1310	0.0196908
COG1471 (ribosomal) protein	COG1471	5320	0.0289952	0	0	0	5320	0.0202333	956	0.0295179	0	0	0	956	0.0132586	1003	0.031975	0	0	0	1003	0.0197936	1007	0.0351354	0	0	0	1007	0.0365937	1010	0.0323177	0	0	0	1010	0.0151814
COG1490 Hydrolyzes D-tyrosyl-tRNA(Tyr) into D-tyrosine and free tRNA(Tyr). Could be a defense mechanism against a harmful effect of D-tyrosine (By similarity)	COG1490	336	0.00183128	0	0	0	336	0.00127789	0	0	0	0	0	0	0	8	0.000255035	0	0	0	8	0.000157875	56	0.00195391	0	0	0	56	0.002035	27	0.000863939	1	83	0.00235285	110	0.00165342
COG1491 Rna-binding protein	COG1491	4653	0.0253599	0	0	0	4653	0.0176965	866	0.026739	0	0	0	866	0.0120104	836	0.0266511	0	0	0	836	0.0164979	708	0.0247029	0	0	0	708	0.0257283	816	0.0261101	0	0	0	816	0.0122654
COG1498 Nucleolar protein	COG1498	6249	0.0340585	0	0	0	6249	0.0237665	1239	0.038256	0	0	0	1239	0.0171834	1106	0.0352586	0	0	0	1106	0.0218262	1028	0.0358681	0	0	0	1028	0.0373569	1093	0.0349735	1	76	0.00215441	1169	0.0175714
COG1499 60S ribosomal export protein Nmd3	COG1499	7866	0.0428715	1	294	0.00370024	8160	0.0310345	1487	0.0459133	0	0	0	1487	0.0206229	1507	0.0480422	0	0	0	1507	0.0297397	1321	0.0460912	0	0	0	1321	0.0480043	1388	0.0444128	0	0	0	1388	0.0208632
COG1500 Ribosome maturation protein	COG1500	3976	0.0216701	0	0	0	3976	0.0151217	824	0.0254422	0	0	0	824	0.0114279	782	0.0249297	0	0	0	782	0.0154323	896	0.0312625	1	374	0.0135909	1270	0.046151	852	0.0272621	0	0	0	852	0.0128065
COG1503 Peptide Chain Release Factor	COG1503	20277	0.110514	0	0	0	20277	0.0771185	3965	0.122425	0	0	0	3965	0.0549898	3823	0.121875	0	0	0	3823	0.0754445	2935	0.102406	0	0	0	2935	0.106656	2927	0.0936573	0	0	0	2927	0.0439961
COG1514 2'-5' rna ligase	COG1514	3738	0.0203729	0	0	0	3738	0.0142166	626	0.0193287	0	0	0	626	0.00868187	596	0.0190001	0	0	0	596	0.0117617	667	0.0232724	0	0	0	667	0.0242384	466	0.0149109	0	0	0	466	0.0070045
COG1530 ribonuclease	COG1530	1187	0.00646942	1	118	0.00148513	1305	0.00496324	34	0.0010498	2	145	0.00365081	179	0.00248251	108	0.00344297	0	0	0	108	0.00213131	223	0.00778073	1	366	0.0133002	589	0.0214039	127	0.00406371	1	584	0.016555	711	0.0106871
COG1534 Rna-binding protein	COG1534	187	0.00101919	0	0	0	187	0.000711208	79	0.00243924	0	0	0	79	0.00109563	88	0.00280538	0	0	0	88	0.00173662	147	0.005129	0	0	0	147	0.00534189	265	0.0084794	0	0	0	265	0.00398325
COG1544 sigma 54 modulation protein ribosomal protein S30ea	COG1544	398	0.00216919	0	0	0	398	0.00151369	8	0.000247012	0	0	0	8	0.00011095	4	0.000127517	0	0	0	4	7.89375e-05	57	0.0019888	0	0	0	57	0.00207134	45	0.0014399	0	0	0	45	0.0006764
COG1549 PUA domain containing protein	COG1549	10194	0.0555596	1	97	0.00122083	10291	0.0391393	2040	0.062988	0	0	0	2040	0.0282923	2024	0.0645238	0	0	0	2024	0.0399424	2026	0.0706895	0	0	0	2026	0.0736235	2750	0.0879937	0	0	0	2750	0.0413356
COG1552 Ribosomal protein	COG1552	1160	0.00632226	0	0	0	1160	0.00441177	261	0.00805876	0	0	0	261	0.00361976	208	0.0066309	0	0	0	208	0.00410475	263	0.00917638	0	0	0	263	0.00955725	255	0.00815942	0	0	0	255	0.00383294
COG1588 Part of ribonuclease P, a protein complex that generates mature tRNA molecules by cleaving their 5'-ends (By similarity)	COG1588	1788	0.009745	0	0	0	1788	0.00680021	338	0.0104363	0	0	0	338	0.00468765	350	0.0111578	0	0	0	350	0.00690703	304	0.0106069	0	0	0	304	0.0110472	347	0.0111032	0	0	0	347	0.0052158
COG1601 translation Initiation Factor	COG1601	1187	0.00646942	0	0	0	1187	0.00451446	190	0.00586653	0	0	0	190	0.00263507	269	0.00857554	0	0	0	269	0.00530854	567	0.0197833	0	0	0	567	0.0206044	497	0.0159029	0	0	0	497	0.00747047
COG1603 Part of ribonuclease P, a protein complex that generates mature tRNA molecules by cleaving their 5'-ends (By similarity)	COG1603	3863	0.0210542	0	0	0	3863	0.014692	719	0.0222002	0	0	0	719	0.00997166	687	0.0219011	0	0	0	687	0.0135575	636	0.0221908	0	0	0	636	0.0231118	760	0.0243183	2	285	0.00807905	1045	0.0157075
COG1631 Ribosomal protein	COG1631	2295	0.0125083	0	0	0	2295	0.00872846	520	0.0160558	0	0	0	520	0.00721177	434	0.0138356	0	0	0	434	0.00856471	532	0.0185621	0	0	0	532	0.0193325	500	0.0159989	0	0	0	500	0.00751556
COG1632 Ribosomal protein L15	COG1632	4160	0.0226729	0	0	0	4160	0.0158215	745	0.023003	0	0	0	745	0.0103323	840	0.0267787	0	0	0	840	0.0165769	683	0.0238307	0	0	0	683	0.0248198	855	0.0273581	0	0	0	855	0.0128516
COG1670 -acetyltransferase	COG1670	4620	0.02518	1	61	0.000767737	4681	0.017803	840	0.0259362	0	0	0	840	0.0116498	800	0.0255035	0	0	0	800	0.0157875	688	0.0240051	0	0	0	688	0.0250015	817	0.0261421	1	199	0.00564116	1016	0.0152716
COG1676 sites to release the intron. The products are an intron and two tRNA half-molecules bearing 2',3' cyclic phosphate and 5'-OH termini. Recognizes a pseudosymmetric substrate in which 2 bulged loops of 3 bases are separated by a stem of 4 bp (By similarity)	COG1676	7231	0.0394106	1	3761	0.0473354	10992	0.0418053	1378	0.0425478	1	245	0.00616861	1623	0.0225091	1300	0.0414432	1	155	0.00802911	1455	0.0287135	1346	0.0469635	0	0	0	1346	0.0489128	1422	0.0455008	0	0	0	1422	0.0213743
COG1717 (ribosomal) protein	COG1717	2392	0.0130369	0	0	0	2392	0.00909738	427	0.0131843	0	0	0	427	0.00592198	415	0.0132299	0	0	0	415	0.00818976	452	0.0157708	0	0	0	452	0.0164254	461	0.014751	0	0	0	461	0.00692935
COG1727 Ribosomal protein	COG1727	3474	0.0189341	0	0	0	3474	0.0132125	658	0.0203167	0	0	0	658	0.00912567	606	0.0193189	0	0	0	606	0.011959	523	0.0182481	0	0	0	523	0.0190055	635	0.0203186	0	0	0	635	0.00954476
COG1736 diphthamide biosynthesis protein	COG1736	6074	0.0331047	1	99	0.001246	6173	0.0234775	1190	0.036743	0	0	0	1190	0.0165039	1203	0.0383509	0	0	0	1203	0.0237404	960	0.0334955	0	0	0	960	0.0348858	1066	0.0341096	0	0	0	1066	0.0160232
COG1746 Catalyzes the addition and repair of the essential 3'- terminal CCA sequence in tRNAs without using a nucleic acid template. Adds these three nucleotides in the order of C, C, and A to the tRNA nucleotide-73, using CTP and ATP as substrates and producing inorganic pyrophosphate (By similarity)	COG1746	8603	0.0468883	1	1366	0.0171923	9969	0.0379146	1612	0.0497729	0	0	0	1612	0.0223565	1509	0.0481059	0	0	0	1509	0.0297792	1497	0.0522321	1	755	0.0274362	2252	0.0818362	1572	0.0503004	2	779	0.0220827	2351	0.0353382
COG1798 S-adenosyl-L-methionine-dependent methyltransferase that catalyzes the trimethylation of the amino group of the modified target histidine residue in translation elongation factor 2 (EF- 2), to form an intermediate called diphthine. The three successive methylation reactions represent the second step of diphthamide biosynthesis (By similarity)	COG1798	7147	0.0389528	2	700	0.00881009	7847	0.0298441	1351	0.0417141	1	149	0.00375152	1500	0.0208032	1182	0.0376814	0	0	0	1182	0.023326	936	0.0326581	1	921	0.0334686	1857	0.0674822	1008	0.0322537	2	385	0.0109138	1393	0.0209384
COG1825 This is one of the proteins that binds to the 5S RNA in the ribosome where it forms part of the central protuberance (By similarity)	COG1825	348	0.00189668	0	0	0	348	0.00132353	5	0.000154382	0	0	0	5	6.9344e-05	16	0.00051007	0	0	0	16	0.00031575	55	0.00191901	0	0	0	55	0.00199866	22	0.00070395	0	0	0	22	0.000330685
COG1841 ribosomal large subunit biogenesis	COG1841	4679	0.0255016	0	0	0	4679	0.0177954	817	0.0252261	0	0	0	817	0.0113308	827	0.0263642	0	0	0	827	0.0163203	773	0.0269709	0	0	0	773	0.0280903	821	0.0262701	0	0	0	821	0.0123405
COG1859 Removes the 2'-phosphate from RNA via an intermediate in which the phosphate is ADP-ribosylated by NAD followed by a presumed transesterification to release the RNA and generate ADP- ribose 1''-2''-cyclic phosphate (APPR P). May function as an ADP- ribosylase (By similarity)	COG1859	4328	0.0235886	0	0	0	4328	0.0164605	804	0.0248247	0	0	0	804	0.0111505	726	0.0231444	0	0	0	726	0.0143271	415	0.0144798	0	0	0	415	0.0150808	436	0.013951	0	0	0	436	0.00655357
COG1867 Dimethylates a single guanine residue at position 26 of a number of tRNAs using S-adenosyl-L-methionine as donor of the methyl groups (By similarity)	COG1867	8858	0.0482781	1	1136	0.0142975	9994	0.0380097	1543	0.0476424	0	0	0	1543	0.0213996	1477	0.0470858	0	0	0	1477	0.0291477	1235	0.0430906	0	0	0	1235	0.0448791	1508	0.0482526	2	409	0.0115941	1917	0.0288147
COG1889 Involved in pre-rRNA and tRNA processing. Utilizes the methyl donor S-adenosyl-L-methionine to catalyze the site-specific 2'-hydroxyl methylation of ribose moieties in rRNA and tRNA. Site specificity is provided by a guide RNA that base pairs with the substrate. Methylation occurs at a characteristic distance from the sequence involved in base pairing with the guide RNA (By similarity)	COG1889	5313	0.0289571	0	0	0	5313	0.0202067	1008	0.0311235	0	0	0	1008	0.0139797	935	0.0298072	0	0	0	935	0.0184516	827	0.028855	0	0	0	827	0.0300527	827	0.0264621	0	0	0	827	0.0124307
COG1890 Ribosomal protein	COG1890	5543	0.0302106	0	0	0	5543	0.0210814	1124	0.0347052	0	0	0	1124	0.0155885	991	0.0315924	0	0	0	991	0.0195568	905	0.0315765	0	0	0	905	0.0328871	1042	0.0333416	0	0	0	1042	0.0156624
COG1911 (ribosomal) protein	COG1911	2917	0.0158983	0	0	0	2917	0.0110941	515	0.0159014	0	0	0	515	0.00714243	580	0.01849	0	0	0	580	0.0114459	527	0.0183876	0	0	0	527	0.0191508	516	0.0165108	0	0	0	516	0.00775606
COG1976 Binds to the 60S ribosomal subunit and prevents its association with the 40S ribosomal subunit to form the 80S initiation complex in the cytoplasm	COG1976	4141	0.0225694	0	0	0	4141	0.0157493	836	0.0258127	0	0	0	836	0.0115943	824	0.0262686	0	0	0	824	0.0162611	637	0.0222257	0	0	0	637	0.0231482	811	0.0259502	0	0	0	811	0.0121902
COG1997 Ribosomal protein	COG1997	2205	0.0120177	0	0	0	2205	0.00838617	438	0.0135239	0	0	0	438	0.00607453	426	0.0135806	0	0	0	426	0.00840684	525	0.0183179	0	0	0	525	0.0190782	436	0.013951	0	0	0	436	0.00655357
COG1998 30S ribosomal protein S27Ae	COG1998	1501	0.00818079	0	0	0	1501	0.00570868	246	0.00759561	0	0	0	246	0.00341172	322	0.0102652	0	0	0	322	0.00635447	247	0.00861812	0	0	0	247	0.00897582	277	0.00886337	0	0	0	277	0.00416362
COG2004 40S ribosomal protein S24	COG2004	2188	0.0119251	0	0	0	2188	0.00832151	446	0.0137709	0	0	0	446	0.00618548	429	0.0136762	0	0	0	429	0.00846604	349	0.012177	0	0	0	349	0.0126824	438	0.014015	0	0	0	438	0.00658363
COG2007 40S ribosomal protein S8	COG2007	3202	0.0174516	0	0	0	3202	0.012178	658	0.0203167	0	0	0	658	0.00912567	598	0.0190639	0	0	0	598	0.0118011	602	0.0210045	0	0	0	602	0.0218763	561	0.0179507	0	0	0	561	0.00843246
COG2016 Rna-binding protein	COG2016	3859	0.0210324	0	0	0	3859	0.0146767	775	0.0239293	0	0	0	775	0.0107483	740	0.0235907	0	0	0	740	0.0146034	565	0.0197135	0	0	0	565	0.0205317	687	0.0219824	0	0	0	687	0.0103264
COG2023 tRNA 5'-leader removal	COG2023	1587	0.00864951	0	0	0	1587	0.00603576	356	0.010992	0	0	0	356	0.00493729	316	0.0100739	0	0	0	316	0.00623606	279	0.00973464	0	0	0	279	0.0101387	384	0.0122871	0	0	0	384	0.00577195
COG2024 Catalyzes the attachment of O-phosphoserine (Sep) to tRNA(Cys) (By similarity)	COG2024	10925	0.0595437	0	0	0	10925	0.0415505	2037	0.0628954	0	0	0	2037	0.0282507	1992	0.0635037	0	0	0	1992	0.0393109	1862	0.0649674	0	0	0	1862	0.0676639	2139	0.0684431	0	0	0	2139	0.0321516
COG2026 Addiction module toxin, RelE StbE family	COG2026	6577	0.0358461	1	640	0.00805494	7217	0.0274481	1632	0.0503904	1	329	0.00828356	1961	0.0271967	1631	0.0519952	1	670	0.0347065	2301	0.0454088	2220	0.0774584	1	677	0.0246017	2897	0.105275	2072	0.0662993	1	558	0.0158179	2630	0.0395318
COG2051 40s ribosomal protein S27	COG2051	1359	0.00740686	0	0	0	1359	0.00516862	247	0.00762649	0	0	0	247	0.00342559	259	0.00825675	0	0	0	259	0.0051112	307	0.0107116	0	0	0	307	0.0111562	322	0.0103033	0	0	0	322	0.00484002
COG2053 Ribosomal protein	COG2053	1701	0.00927083	0	0	0	1701	0.00646933	289	0.0089233	0	0	0	289	0.00400808	311	0.00991448	0	0	0	311	0.00613739	299	0.0104325	0	0	0	299	0.0108655	314	0.0100473	0	0	0	314	0.00471977
COG2058 Ribosomal protein	COG2058	1501	0.00818079	0	0	0	1501	0.00570868	256	0.00790438	0	0	0	256	0.00355041	288	0.00918125	0	0	0	288	0.0056835	217	0.00757138	0	0	0	217	0.00788564	221	0.0070715	0	0	0	221	0.00332188
COG2075 Ribosomal protein	COG2075	1498	0.00816444	0	0	0	1498	0.00569727	283	0.00873804	0	0	0	283	0.00392487	296	0.00943629	0	0	0	296	0.00584137	283	0.0098742	0	0	0	283	0.010284	314	0.0100473	0	0	0	314	0.00471977
COG2092 Promotes the exchange of GDP for GTP in EF-1-alpha GDP, thus allowing the regeneration of EF-1-alpha GTP that could then be used to form the ternary complex EF-1-alpha GTP AAtRNA (By similarity)	COG2092	1758	0.0095815	0	0	0	1758	0.00668612	324	0.010004	0	0	0	324	0.00449349	311	0.00991448	0	0	0	311	0.00613739	260	0.0090717	0	0	0	260	0.00944823	306	0.0097913	0	0	0	306	0.00459952
COG2097 (ribosomal) protein	COG2097	2357	0.0128462	0	0	0	2357	0.00896426	465	0.0143576	0	0	0	465	0.00644899	522	0.016641	0	0	0	522	0.0103013	384	0.0133982	0	0	0	384	0.0139543	402	0.0128631	0	0	0	402	0.00604251
COG2117 Subunit of tRNA(5-methylaminomethyl-2-thiouridylate) methyltransferase	COG2117	5085	0.0277144	0	0	0	5085	0.0193395	1056	0.0326056	0	0	0	1056	0.0146454	992	0.0316243	0	0	0	992	0.0195765	869	0.0303204	1	440	0.0159893	1309	0.0475682	841	0.0269101	0	0	0	841	0.0126412
COG2123 Exosome complex	COG2123	4769	0.0259921	0	0	0	4769	0.0181377	839	0.0259054	0	0	0	839	0.0116359	801	0.0255354	0	0	0	801	0.0158072	449	0.0156661	0	0	0	449	0.0163164	531	0.0169908	0	0	0	531	0.00798152
COG2125 40s ribosomal protein s6	COG2125	2678	0.0145957	0	0	0	2678	0.0101851	515	0.0159014	0	0	0	515	0.00714243	486	0.0154934	0	0	0	486	0.0095909	426	0.0148636	0	0	0	426	0.0154806	441	0.014111	0	0	0	441	0.00662872
COG2126 Binds to the 23S rRNA (By similarity)	COG2126	1311	0.00714525	0	0	0	1311	0.00498606	299	0.00923207	0	0	0	299	0.00414677	263	0.00838427	0	0	0	263	0.00519014	297	0.0103627	0	0	0	297	0.0107928	282	0.00902336	0	0	0	282	0.00423878
COG2139 (ribosomal) protein	COG2139	2544	0.0138654	0	0	0	2544	0.00967547	512	0.0158088	0	0	0	512	0.00710082	513	0.0163541	0	0	0	513	0.0101237	506	0.0176549	0	0	0	506	0.0183877	517	0.0165428	0	0	0	517	0.00777109
COG2147 ribosomal protein L19	COG2147	3143	0.0171301	0	0	0	3143	0.0119536	577	0.0178157	0	0	0	577	0.0080023	603	0.0192232	0	0	0	603	0.0118998	577	0.0201322	0	0	0	577	0.0209678	640	0.0204785	0	0	0	640	0.00961992
COG2157 ribosomal protein	COG2157	1523	0.00830069	0	0	0	1523	0.00579235	353	0.0108994	0	0	0	353	0.00489569	288	0.00918125	0	0	0	288	0.0056835	287	0.0100138	0	0	0	287	0.0104294	307	0.0098233	0	0	0	307	0.00461455
COG2167 Ribosomal protein	COG2167	948	0.00516681	0	0	0	948	0.00360548	170	0.005249	0	0	0	170	0.0023577	136	0.00433559	0	0	0	136	0.00268387	200	0.00697823	0	0	0	200	0.00726787	274	0.00876738	0	0	0	274	0.00411853
COG2178 translin	COG2178	3675	0.0200296	0	0	0	3675	0.0139769	692	0.0213665	0	0	0	692	0.00959721	685	0.0218374	0	0	0	685	0.013518	293	0.0102231	0	0	0	293	0.0106474	429	0.013727	0	0	0	429	0.00644835
COG2238 Ribosomal protein	COG2238	3474	0.0189341	0	0	0	3474	0.0132125	737	0.022756	0	0	0	737	0.0102213	671	0.021391	1	136	0.00704489	807	0.0159256	600	0.0209347	0	0	0	600	0.0218036	704	0.0225264	0	0	0	704	0.0105819
COG2260 rRNA processing	COG2260	1133	0.00617511	0	0	0	1133	0.00430908	192	0.00592828	0	0	0	192	0.00266281	239	0.00761916	0	0	0	239	0.00471651	141	0.00491965	0	0	0	141	0.00512385	141	0.00451168	0	0	0	141	0.00211939
COG2263 Methyltransferase	COG2263	4459	0.0243026	0	0	0	4459	0.0169587	882	0.0272331	0	0	0	882	0.0122323	883	0.0281495	0	0	0	883	0.0174254	655	0.0228537	0	0	0	655	0.0238023	732	0.0234223	0	0	0	732	0.0110028
COG2264 Methylates ribosomal protein L11 (By similarity)	COG2264	646	0.00352085	1	315	0.00396454	961	0.00365492	7	0.000216135	0	0	0	7	9.70816e-05	15	0.00047819	0	0	0	15	0.000296015	93	0.00324488	0	0	0	93	0.00337956	25	0.000799943	1	145	0.00411039	170	0.00255529
COG2265 catalyzes the formation of 5-methyl-uridine at position	COG2265	1229	0.00669833	3	1614	0.0203136	2843	0.0108126	15	0.000463147	0	0	0	15	0.000208032	36	0.00114766	0	0	0	36	0.000710437	192	0.0066991	1	137	0.00497849	329	0.0119556	52	0.00166388	3	967	0.0274121	1019	0.0153167
COG2511 Allows the formation of correctly charged Gln-tRNA(Gln) through the transamidation of misacylated Glu-tRNA(Gln) in organisms which lack glutaminyl-tRNA synthetase. The reaction takes place in the presence of glutamine and ATP through an activated gamma-phospho-Glu-tRNA(Gln). The gatDE system is specific for glutamate and does not act on aspartate (By similarity)	COG2511	11509	0.0627267	0	0	0	11509	0.0437716	1944	0.0600239	0	0	0	1944	0.0269609	1921	0.0612402	0	0	0	1921	0.0379097	1640	0.0572215	0	0	0	1640	0.0595966	1957	0.0626196	0	0	0	1957	0.0294159
COG2519 trna methyltransferase	COG2519	758	0.00413127	0	0	0	758	0.00288286	168	0.00518725	0	0	0	168	0.00232996	244	0.00777856	0	0	0	244	0.00481518	468	0.0163291	0	0	0	468	0.0170068	378	0.0120951	0	0	0	378	0.00568176
COG2868 (ribosomal) protein	COG2868	188	0.00102464	0	0	0	188	0.000715011	0	0	0	0	0	0	0	1	3.18793e-05	0	0	0	1	1.97344e-05	28	0.000976953	0	0	0	28	0.0010175	2	6.39955e-05	0	0	0	2	3.00622e-05
COG2888 zn-ribbon RNA-binding protein	COG2888	1270	0.00692179	0	0	0	1270	0.00483013	197	0.00608267	0	0	0	197	0.00273215	223	0.00710909	0	0	0	223	0.00440076	144	0.00502433	0	0	0	144	0.00523287	205	0.00655953	0	0	0	205	0.00308138
COG2890 Methylates the class 1 translation termination release factors RF1 PrfA and RF2 PrfB on the glutamine residue of the universally conserved GGQ motif (By similarity)	COG2890	4500	0.024526	1	183	0.00230321	4683	0.0178106	741	0.0228795	0	0	0	741	0.0102768	727	0.0231763	0	0	0	727	0.0143469	649	0.0226444	0	0	0	649	0.0235842	631	0.0201906	0	0	0	631	0.00948464
COG3270 Specifically methylates the cytosine at position 1407 (m5C1407) of 16S rRNA (By similarity)	COG3270	2802	0.0152715	0	0	0	2802	0.0106567	588	0.0181554	0	0	0	588	0.00815485	480	0.0153021	0	0	0	480	0.00947249	294	0.010258	0	0	0	294	0.0106838	184	0.00588758	0	0	0	184	0.00276573
COG3276 Selenocysteine-specific translation elongation factor	COG3276	7779	0.0423973	3	484	0.00609155	8263	0.0314263	1235	0.0381325	3	1745	0.0439356	2980	0.041329	1196	0.0381277	1	154	0.00797731	1350	0.0266414	1320	0.0460563	1	157	0.00570528	1477	0.0536732	1411	0.0451488	3	3453	0.0978841	4864	0.0731114
COG3277 h aca RNA-protein complex component gar1	COG3277	2391	0.0130315	0	0	0	2391	0.00909357	523	0.0161484	0	0	0	523	0.00725338	427	0.0136125	0	0	0	427	0.00842657	359	0.0125259	0	0	0	359	0.0130458	472	0.0151029	0	0	0	472	0.00709469
COG4108 Increases the formation of ribosomal termination complexes and stimulates activities of RF-1 and RF-2. It binds guanine nucleotides and has strong preference for UGA stop codons. It may interact directly with the ribosome. The stimulation of RF- 1 and RF-2 is significantly reduced by GTP and GDP, but not by GMP (By similarity)	COG4108	75	0.000408767	1	142	0.00178719	217	0.000825305	14	0.000432271	1	107	0.00269405	121	0.00167812	47	0.00149833	0	0	0	47	0.000927515	13	0.000453585	0	0	0	13	0.000472412	57	0.00182387	1	246	0.0069735	303	0.00455443
COG5256 This protein promotes the GTP-dependent binding of aminoacyl-tRNA to the A-site of ribosomes during protein biosynthesis (By similarity)	COG5256	13613	0.0741939	0	0	0	13613	0.0517737	2311	0.0713555	0	0	0	2311	0.0320508	2408	0.0767655	0	0	0	2408	0.0475203	2078	0.0725038	0	0	0	2078	0.0755132	2132	0.0682192	0	0	0	2132	0.0320463
COG5257 translation initiation factor	COG5257	10076	0.0549165	0	0	0	10076	0.0383216	1877	0.0579552	0	0	0	1877	0.0260317	1928	0.0614634	0	0	0	1928	0.0380479	1772	0.0618271	0	0	0	1772	0.0643933	1855	0.0593558	0	0	0	1855	0.0278827
COG5270 phosphoadenosine phosphosulfate reductase	COG5270	14234	0.0775785	0	0	0	14234	0.0541355	2840	0.0876892	0	0	0	2840	0.0393874	2581	0.0822806	0	0	0	2581	0.0509344	2010	0.0701312	0	0	0	2010	0.0730421	2709	0.0866818	0	0	0	2709	0.0407193
ENOG410XUIF 50S ribosomal protein L33	ENOG410XUIF	2	1.09005e-05	0	0	0	2	7.6065e-06	1	3.08765e-05	0	0	0	1	1.38688e-05	0	0	0	0	0	0	0	0	0	0	0	0	0	0	0	0	0	0	0	0	0
ENOG410XUY5 50s ribosomal protein l29	ENOG410XUY5	0	0	0	0	0	0	0	3	9.26294e-05	0	0	0	3	4.16064e-05	0	0	0	0	0	0	0	0	0	0	0	0	0	0	0	0	0	0	0	0	0
ENOG410ZA8C 50S ribosomal protein L28	ENOG410ZA8C	4	2.18009e-05	0	0	0	4	1.5213e-05	0	0	0	0	0	0	0	0	0	0	0	0	0	0	0	0	0	0	0	0	0	0	0	0	0	0	0	0
ENOG410ZDNF RNaseP catalyzes the removal of the 5'-leader sequence from pre-tRNA to produce the mature 5'-terminus. It can also cleave other RNA substrates such as 4.5S RNA. The protein component plays an auxiliary but essential role in vivo by binding to the 5'-leader sequence and broadening the substrate specificity of the ribozyme (By similarity)	ENOG410ZDNF	0	0	0	0	0	0	0	0	0	0	0	0	0	0	0	0	0	0	0	0	0	0	0	0	0	0	0	0	1	3.19977e-05	0	0	0	1	1.50311e-05
ENOG410ZIKU 50S ribosomal protein L35	ENOG410ZIKU	1	5.45023e-06	0	0	0	1	3.80325e-06	1	3.08765e-05	0	0	0	1	1.38688e-05	0	0	0	0	0	0	0	7	0.000244238	0	0	0	7	0.000254376	1	3.19977e-05	0	0	0	1	1.50311e-05
ENOG410ZIUU 50S ribosomal protein L29	ENOG410ZIUU	0	0	0	0	0	0	0	0	0	0	0	0	0	0	0	0	0	0	0	0	0	2	6.97823e-05	0	0	0	2	7.26787e-05	1	3.19977e-05	0	0	0	1	1.50311e-05
ENOG410ZS8D Catalyzes the attachment of pyrrolysine to tRNA(Pyl). Pyrrolysine is a lysine derivative encoded by the termination codon UAG	ENOG410ZS8D	0	0	0	0	0	0	0	22	0.000679283	0	0	0	22	0.000305114	0	0	0	0	0	0	0	6	0.000209347	0	0	0	6	0.000218036	596	0.0190706	0	0	0	596	0.00895855
ENOG410ZXJV 50S ribosomal protein L35	ENOG410ZXJV	0	0	0	0	0	0	0	2	6.1753e-05	0	0	0	2	2.77376e-05	2	6.37587e-05	0	0	0	2	3.94687e-05	0	0	0	0	0	0	0	0	0	0	0	0	0	0
ENOG410ZXSA 50s ribosomal protein l32	ENOG410ZXSA	6	3.27014e-05	0	0	0	6	2.28195e-05	5	0.000154382	0	0	0	5	6.9344e-05	5	0.000159397	0	0	0	5	9.86718e-05	0	0	0	0	0	0	0	2	6.39955e-05	0	0	0	2	3.00622e-05
ENOG410ZXVA 50S ribosomal protein L32	ENOG410ZXVA	4	2.18009e-05	0	0	0	4	1.5213e-05	0	0	0	0	0	0	0	0	0	0	0	0	0	0	19	0.000662932	0	0	0	19	0.000690448	0	0	0	0	0	0	0
ENOG410ZYC6 50S ribosomal protein L34	ENOG410ZYC6	2	1.09005e-05	0	0	0	2	7.6065e-06	0	0	0	0	0	0	0	0	0	0	0	0	0	0	0	0	0	0	0	0	0	0	0	0	0	0	0	0
ENOG410ZYFH 50S ribosomal protein L36	ENOG410ZYFH	4	2.18009e-05	0	0	0	4	1.5213e-05	0	0	0	0	0	0	0	0	0	0	0	0	0	0	18	0.000628041	0	0	0	18	0.000654109	0	0	0	0	0	0	0
ENOG410ZYGT 50S ribosomal protein L36	ENOG410ZYGT	2	1.09005e-05	0	0	0	2	7.6065e-06	0	0	0	0	0	0	0	0	0	0	0	0	0	0	0	0	0	0	0	0	0	0	0	0	0	0	0	0
ENOG410ZYW7 50S ribosomal protein L30	ENOG410ZYW7	0	0	0	0	0	0	0	0	0	0	0	0	0	0	0	0	0	0	0	0	0	0	0	0	0	0	0	0	0	0	0	0	0	0	0
ENOG410ZZ1I 50S ribosomal protein L33	ENOG410ZZ1I	4	2.18009e-05	0	0	0	4	1.5213e-05	5	0.000154382	0	0	0	5	6.9344e-05	4	0.000127517	0	0	0	4	7.89375e-05	2	6.97823e-05	0	0	0	2	7.26787e-05	3	9.59932e-05	0	0	0	3	4.50934e-05
ENOG410ZZ6G ribosomal protein l30	ENOG410ZZ6G	0	0	0	0	0	0	0	0	0	0	0	0	0	0	1	3.18793e-05	0	0	0	1	1.97344e-05	2	6.97823e-05	0	0	0	2	7.26787e-05	0	0	0	0	0	0	0
ENOG4111UZW RNaseP catalyzes the removal of the 5'-leader sequence from pre-tRNA to produce the mature 5'-terminus. It can also cleave other RNA substrates such as 4.5S RNA. The protein component plays an auxiliary but essential role in vivo by binding to the 5'-leader sequence and broadening the substrate specificity of the ribozyme (By similarity)	ENOG4111UZW	0	0	0	0	0	0	0	0	0	0	0	0	0	0	0	0	0	0	0	0	0	0	0	0	0	0	0	0	4	0.000127991	0	0	0	4	6.01245e-05
ENOG41123W2 30S ribosomal protein s21	ENOG41123W2	4	2.18009e-05	0	0	0	4	1.5213e-05	0	0	0	0	0	0	0	0	0	0	0	0	0	0	9	0.00031402	0	0	0	9	0.000327054	2	6.39955e-05	0	0	0	2	3.00622e-05
ENOG4112BAD translation initiation factor SUI1	ENOG4112BAD	3	1.63507e-05	0	0	0	3	1.14098e-05	0	0	0	0	0	0	0	3	9.5638e-05	0	0	0	3	5.92031e-05	0	0	0	0	0	0	0	0	0	0	0	0	0	0
ENOG4112BGA Ribosomal protein L7ae family	ENOG4112BGA	2	1.09005e-05	0	0	0	2	7.6065e-06	2	6.1753e-05	0	0	0	2	2.77376e-05	2	6.37587e-05	0	0	0	2	3.94687e-05	0	0	0	0	0	0	0	3	9.59932e-05	0	0	0	3	4.50934e-05
COG0085 DNA-dependent RNA polymerase catalyzes the transcription of DNA into RNA using the four ribonucleoside triphosphates as substrates (By similarity)	COG0085	28087	0.153081	7	2215	0.0278776	30302	0.115246	4974	0.15358	0	0	0	4974	0.0689834	4938	0.15742	2	1613	0.0835545	6551	0.12928	5201	0.181469	4	1375	0.0499666	6576	0.238968	5158	0.165044	6	2456	0.0696216	7614	0.114447
COG0086 DNA-dependent RNA polymerase catalyzes the transcription of DNA into RNA using the four ribonucleoside triphosphates as substrates (By similarity)	COG0086	34752	0.189406	9	5182	0.0652199	39934	0.151879	6428	0.198474	6	2257	0.0568268	8685	0.12045	6486	0.206769	2	220	0.0113962	6706	0.132339	6248	0.218	6	4792	0.174138	11040	0.401187	6629	0.212113	9	5368	0.15217	11997	0.180328
COG0195 Transcription elongation factor NusA	COG0195	4921	0.0268206	2	1302	0.0163868	6223	0.0236676	922	0.0284681	1	21	0.000528738	943	0.0130783	891	0.0284045	2	375	0.0194253	1266	0.0249837	1148	0.0400551	4	807	0.0293259	1955	0.0710435	998	0.0319337	3	688	0.0195031	1686	0.0253425
COG0202 DNA-dependent RNA polymerase catalyzes the transcription of DNA into RNA using the four ribonucleoside triphosphates as substrates (By similarity)	COG0202	6558	0.0357426	4	1276	0.0160595	7834	0.0297947	1132	0.0349522	0	0	0	1132	0.0156995	1182	0.0376814	3	243	0.0125876	1425	0.0281215	1192	0.0415903	0	0	0	1192	0.0433165	1217	0.0389412	4	792	0.0224513	2009	0.0301975
COG0217 transcriptional regulatory protein	COG0217	395	0.00215284	1	445	0.0056007	840	0.00319473	7	0.000216135	0	0	0	7	9.70816e-05	24	0.000765104	1	110	0.00569808	134	0.0026444	157	0.00547791	1	142	0.00516019	299	0.0108655	23	0.000735948	1	213	0.00603803	236	0.00354734
COG0250 Participates in transcription elongation, termination and antitermination (By similarity)	COG0250	4477	0.0244007	2	382	0.00480779	4859	0.01848	857	0.0264611	1	60	0.00151068	917	0.0127177	808	0.0257585	1	60	0.00310804	868	0.0171294	898	0.0313323	0	0	0	898	0.0326327	835	0.0267181	1	325	0.00921295	1160	0.0174361
COG0317 In eubacteria ppGpp (guanosine 3'-diphosphate 5-' diphosphate) is a mediator of the stringent response that coordinates a variety of cellular activities in response to changes in nutritional abundance (By similarity)	COG0317	1704	0.00928719	7	5483	0.0690082	7187	0.027334	37	0.00114243	1	138	0.00347457	175	0.00242704	62	0.00197652	3	1539	0.0797213	1601	0.0315947	241	0.00840877	6	7770	0.282357	8011	0.291115	98	0.00313578	6	3420	0.0969486	3518	0.0528795
COG0378 Facilitates the functional incorporation of the urease nickel metallocenter. This process requires GTP hydrolysis, probably effectuated by UreG (By similarity)	COG0378	7546	0.0411274	2	266	0.00334784	7812	0.029711	1352	0.041745	0	0	0	1352	0.0187506	1383	0.0440891	0	0	0	1383	0.0272926	2041	0.0712129	0	0	0	2041	0.0741686	2272	0.0726988	0	0	0	2272	0.0341507
COG0454 acetyltransferase	COG0454	16562	0.0902666	1	214	0.00269337	16776	0.0638033	3258	0.100596	0	0	0	3258	0.0451845	2935	0.0935659	1	33	0.00170942	2968	0.0585716	1855	0.0647231	0	0	0	1855	0.0674095	2591	0.0829061	1	154	0.00436552	2745	0.0412604
COG0557 3'-5' exoribonuclease that releases 5'-nucleoside monophosphates and is involved in maturation of structured RNAs (By similarity)	COG0557	11591	0.0631736	5	10948	0.13779	22539	0.0857215	1812	0.0559482	2	1221	0.0307423	3033	0.0420641	1737	0.0553744	1	149	0.0077183	1886	0.037219	1631	0.0569075	3	3071	0.111598	4702	0.170868	1832	0.0586198	5	7206	0.204272	9038	0.135851
COG0568 Sigma factors are initiation factors that promote the attachment of RNA polymerase to specific initiation sites and are then released (By similarity)	COG0568	1108	0.00603885	7	1779	0.0223902	2887	0.01098	66	0.00203785	2	132	0.0033235	198	0.00274602	135	0.00430371	1	41	0.00212383	176	0.00347325	288	0.0100487	0	0	0	288	0.0104657	213	0.00681552	6	2395	0.0678924	2608	0.0392012
COG0571 Digests double-stranded RNA. Involved in the processing of primary rRNA transcript to yield the immediate precursors to the large and small rRNAs (23S and 16S). Also processes some mRNAs, and tRNAs when they are encoded in the rRNA operon (By similarity)	COG0571	1211	0.00660022	1	998	0.0125607	2209	0.00840138	202	0.00623705	0	0	0	202	0.0028015	293	0.00934065	2	244	0.0126394	537	0.0105974	535	0.0186668	2	178	0.00646841	713	0.02591	408	0.0130551	1	345	0.0097799	753	0.0113184
COG0583 Transcriptional regulator	COG0583	1765	0.00961965	2	451	0.00567622	2216	0.008428	33	0.00101892	1	47	0.00118337	80	0.0011095	28	0.000892622	0	0	0	28	0.000552562	146	0.00509411	1	51	0.00185331	197	0.00715885	29	0.000927934	1	52	0.00147407	81	0.00121752
COG0640 Transcriptional regulator, arsr family	COG0640	17958	0.0978752	1	1948	0.0245172	19906	0.0757075	3561	0.109951	2	553	0.0139234	4114	0.0570562	3227	0.102875	2	762	0.0394721	3989	0.0787204	2886	0.100696	3	2783	0.101132	5669	0.206008	4255	0.13615	2	1530	0.0433717	5785	0.086955
COG0735 Ferric uptake regulator, Fur family	COG0735	3712	0.0202312	0	0	0	3712	0.0141177	536	0.0165498	0	0	0	536	0.00743367	548	0.0174699	1	73	0.00378145	621	0.012255	298	0.0103976	0	0	0	298	0.0108291	200	0.00639955	1	26	0.000737036	226	0.00339703
COG0781 DNA-dependent transcription, termination	COG0781	266	0.00144976	0	0	0	266	0.00101166	3	9.26294e-05	0	0	0	3	4.16064e-05	7	0.000223155	1	65	0.00336705	72	0.00142087	45	0.0015701	0	0	0	45	0.00163527	15	0.000479966	0	0	0	15	0.000225467
COG0782 Necessary for efficient RNA polymerase transcription elongation past template-encoded arresting sites. The arresting sites in DNA have the property of trapping a certain fraction of elongating RNA polymerases that pass through, resulting in locked ternary complexes. Cleavage of the nascent transcript by cleavage factors such as GreA or GreB allows the resumption of elongation from the new…	COG0782	341	0.00185853	1	118	0.00148513	459	0.00174569	2	6.1753e-05	0	0	0	2	2.77376e-05	21	0.000669466	0	0	0	21	0.000414422	71	0.00247727	0	0	0	71	0.00258009	35	0.00111992	1	23	0.000651994	58	0.000871805
COG0789 Transcriptional regulator	COG0789	28	0.000152606	0	0	0	28	0.000106491	7	0.000216135	0	0	0	7	9.70816e-05	8	0.000255035	0	0	0	8	0.000157875	33	0.00115141	0	0	0	33	0.0011992	18	0.000575959	0	0	0	18	0.00027056
COG0819 Transcriptional activator, tena	COG0819	8	4.36018e-05	0	0	0	8	3.0426e-05	0	0	0	0	0	0	0	9	0.000286914	0	0	0	9	0.000177609	0	0	0	0	0	0	0	12	0.000383973	0	0	0	12	0.000180373
COG0846 NAD-dependent protein deacetylase which modulates the activities of several enzymes which are inactive in their acetylated form	COG0846	538	0.00293222	3	818	0.0102952	1356	0.00515721	8	0.000247012	1	42	0.00105748	50	0.00069344	23	0.000733225	2	269	0.0139344	292	0.00576243	95	0.00331466	1	85	0.00308885	180	0.00654109	16	0.000511964	2	244	0.0069168	260	0.00390809
COG0864 Transcriptional regulator	COG0864	7395	0.0403044	0	0	0	7395	0.028125	1365	0.0421464	0	0	0	1365	0.0189309	1374	0.0438022	0	0	0	1374	0.027115	1277	0.044556	0	0	0	1277	0.0464054	1403	0.0448928	1	42	0.0011906	1445	0.02172
COG1095 DNA-directed RNA Polymerase	COG1095	4918	0.0268042	0	0	0	4918	0.0187044	1047	0.0323277	0	0	0	1047	0.0145206	957	0.0305085	0	0	0	957	0.0188858	800	0.0279129	0	0	0	800	0.0290715	881	0.02819	0	0	0	881	0.0132424
COG1158 Facilitates transcription termination by a mechanism that involves Rho binding to the nascent RNA, activation of Rho's RNA-dependent ATPase activity, and release of the mRNA from the DNA template (By similarity)	COG1158	1124	0.00612605	5	4097	0.0515642	5221	0.0198568	75	0.00231574	0	0	0	75	0.00104016	96	0.00306042	0	0	0	96	0.0018945	274	0.00956018	3	1277	0.0464054	1551	0.0563623	177	0.0056636	3	4624	0.131079	4801	0.0721644
COG1167 Transcriptional regulator, gntR family	COG1167	7261	0.0395741	1	2742	0.0345104	10003	0.0380439	1493	0.0460986	1	295	0.00742751	1788	0.0247974	1452	0.0462888	1	640	0.0331524	2092	0.0412843	1414	0.0493361	1	4193	0.152371	5607	0.203755	1091	0.0349095	1	3094	0.0877073	4185	0.0629052
COG1191 Sigma factors are initiation factors that promote the attachment of RNA polymerase to specific initiation sites and are then released (By similarity)	COG1191	2550	0.0138981	3	426	0.00536157	2976	0.0113185	22	0.000679283	1	74	0.00186317	96	0.0013314	16	0.00051007	0	0	0	16	0.00031575	270	0.00942061	3	234	0.00850341	504	0.018315	48	0.00153589	3	236	0.00669002	284	0.00426884
COG1221 transcriptional	COG1221	15	8.17534e-05	1	73	0.000918767	88	0.000334686	0	0	0	0	0	0	0	0	0	0	0	0	0	0	3	0.000104673	0	0	0	3	0.000109018	2	6.39955e-05	0	0	0	2	3.00622e-05
COG1278 Cold shock protein	COG1278	2991	0.0163016	0	0	0	2991	0.0113755	616	0.0190199	1	62	0.00156104	678	0.00940304	578	0.0184263	1	38	0.00196843	616	0.0121564	389	0.0135727	1	58	0.00210768	447	0.0162437	235	0.00751947	0	0	0	235	0.00353231
COG1293 Fibronectin-binding A domain protein	COG1293	11694	0.0637349	0	0	0	11694	0.0444752	2231	0.0688854	0	0	0	2231	0.0309413	2223	0.0708678	0	0	0	2223	0.0438695	2008	0.0700615	2	382	0.0138816	2390	0.0868511	2298	0.0735308	1	80	0.0022678	2378	0.035744
COG1308 nascent polypeptide-associated complex	COG1308	2543	0.0138599	0	0	0	2543	0.00967167	519	0.0160249	0	0	0	519	0.00719791	517	0.0164816	0	0	0	517	0.0102027	442	0.0154219	0	0	0	442	0.016062	468	0.0149749	0	0	0	468	0.00703456
COG1309 Transcriptional regulator	COG1309	5226	0.0284829	0	0	0	5226	0.0198758	957	0.0295488	0	0	0	957	0.0132724	804	0.025631	1	49	0.00253823	853	0.0168334	458	0.0159802	0	0	0	458	0.0166434	726	0.0232303	0	0	0	726	0.0109126
COG1316 transcriptional	COG1316	1610	0.00877486	1	189	0.00237872	1799	0.00684205	6	0.000185259	0	0	0	6	8.32128e-05	6	0.000191276	0	0	0	6	0.000118406	205	0.00715269	0	0	0	205	0.00744957	19	0.000607957	0	0	0	19	0.000285591
COG1321 cellular manganese ion homeostasis	COG1321	6542	0.0356554	0	0	0	6542	0.0248809	1187	0.0366504	0	0	0	1187	0.0164623	1118	0.0356411	0	0	0	1118	0.022063	1167	0.040718	0	0	0	1167	0.042408	1467	0.0469407	1	83	0.00235285	1550	0.0232982
COG1327 Negatively regulates transcription of bacterial ribonucleotide reductase nrd genes and operons by binding to NrdR- boxes (By similarity)	COG1327	344	0.00187488	0	0	0	344	0.00130832	14	0.000432271	0	0	0	14	0.000194163	18	0.000573828	0	0	0	18	0.000355219	48	0.00167478	0	0	0	48	0.00174429	6	0.000191986	0	0	0	6	9.01867e-05
COG1329 Transcriptional regulator (CarD family	COG1329	9	4.9052e-05	0	0	0	9	3.42293e-05	4	0.000123506	0	0	0	4	5.54752e-05	0	0	0	0	0	0	0	5	0.000174456	0	0	0	5	0.000181697	4	0.000127991	1	30	0.000850426	34	0.000511058
COG1356 Transcriptional regulator	COG1356	3603	0.0196372	1	776	0.00976662	4379	0.0166544	684	0.0211195	0	0	0	684	0.00948626	663	0.021136	0	0	0	663	0.0130839	463	0.0161546	1	436	0.015844	899	0.0326691	390	0.0124791	0	0	0	390	0.00586214
COG1378 Transcriptional regulator	COG1378	1927	0.0105026	0	0	0	1927	0.00732886	472	0.0145737	1	334	0.00840945	806	0.0111782	551	0.0175655	1	482	0.0249679	1033	0.0203856	1137	0.0396713	0	0	0	1137	0.0413179	1823	0.0583319	1	3127	0.0886428	4950	0.074404
COG1386 Participates in chromosomal partition during cell division. May act via the formation of a condensin-like complex containing Smc and ScpA that pull DNA away from mid-cell into both cell halves (By similarity)	COG1386	7572	0.0412691	0	0	0	7572	0.0287982	1448	0.0447091	0	0	0	1448	0.020082	1229	0.0391797	0	0	0	1229	0.0242535	751	0.0262033	0	0	0	751	0.0272909	951	0.0304298	0	0	0	951	0.0142946
COG1395 sequence-specific DNA binding	COG1395	7830	0.0426753	0	0	0	7830	0.0297795	1580	0.0487848	0	0	0	1580	0.0219127	1593	0.0507838	0	0	0	1593	0.0314368	1432	0.0499641	0	0	0	1432	0.052038	1519	0.0486045	0	0	0	1519	0.0228323
COG1396 Transcriptional regulator	COG1396	4400	0.023981	1	212	0.0026682	4612	0.0175406	902	0.0278506	2	203	0.00511114	1105	0.015325	774	0.0246746	1	61	0.00315984	835	0.0164782	516	0.0180038	0	0	0	516	0.0187511	677	0.0216625	1	26	0.000737036	703	0.0105669
COG1405 Stabilizes TBP binding to an archaeal box-A promoter. Also responsible for recruiting RNA polymerase II to the pre- initiation complex (DNA-TBP-TFIIB) (By similarity)	COG1405	7786	0.0424355	0	0	0	7786	0.0296121	1400	0.0432271	0	0	0	1400	0.0194163	1384	0.044121	0	0	0	1384	0.0273124	1343	0.0468588	0	0	0	1343	0.0488038	1330	0.042557	1	65	0.00184259	1395	0.0209684
COG1414 Iclr family transcriptional regulator	COG1414	114	0.000621326	0	0	0	114	0.000433571	51	0.0015747	1	30	0.00075534	81	0.00112337	52	0.00165773	0	0	0	52	0.00102619	2	6.97823e-05	0	0	0	2	7.26787e-05	49	0.00156789	0	0	0	49	0.000736525
COG1420 Negative regulator of class I heat shock genes (grpE- dnaK-dnaJ and groELS operons). Prevents heat-shock induction of these operons (By similarity)	COG1420	746	0.00406587	3	521	0.00655723	1267	0.00481872	23	0.000710159	2	110	0.00276958	133	0.00184455	12	0.000382552	3	269	0.0139344	281	0.00554536	85	0.00296575	1	136	0.00494215	221	0.008031	41	0.00131191	3	397	0.011254	438	0.00658363
COG1438 Regulates arginine biosynthesis genes (By similarity)	COG1438	307	0.00167322	0	0	0	307	0.0011676	0	0	0	0	0	0	0	0	0	0	0	0	0	0	39	0.00136076	0	0	0	39	0.00141724	5	0.000159989	0	0	0	5	7.51556e-05
COG1460 rna polymerase	COG1460	2366	0.0128952	0	0	0	2366	0.00899849	529	0.0163337	0	0	0	529	0.00733659	486	0.0154934	0	0	0	486	0.0095909	550	0.0191901	0	0	0	550	0.0199866	536	0.0171508	0	0	0	536	0.00805668
COG1475 parb-like partition protein	COG1475	4216	0.0229782	3	1406	0.0176957	5622	0.0213819	325	0.0100349	2	130	0.00327314	455	0.0063103	313	0.00997824	1	59	0.00305624	372	0.00734118	938	0.0327279	3	428	0.0155532	1366	0.0496396	649	0.0207665	1	59	0.00167251	708	0.010642
COG1476 Transcriptional regulator	COG1476	1783	0.00971775	0	0	0	1783	0.0067812	375	0.0115787	0	0	0	375	0.0052008	336	0.0107115	0	0	0	336	0.00663075	326	0.0113745	0	0	0	326	0.0118466	482	0.0154229	0	0	0	482	0.007245
COG1481 May be required for sporulation (By similarity)	COG1481	546	0.00297582	1	64	0.000805494	610	0.00231998	8	0.000247012	0	0	0	8	0.00011095	7	0.000223155	0	0	0	7	0.000138141	66	0.00230282	1	254	0.0092302	320	0.0116286	13	0.00041597	0	0	0	13	0.000195405
COG1497 Transcriptional regulator	COG1497	5031	0.0274201	0	0	0	5031	0.0191342	1081	0.0333775	0	0	0	1081	0.0149922	1019	0.0324851	0	0	0	1019	0.0201093	1048	0.0365659	0	0	0	1048	0.0380837	1117	0.0357415	0	0	0	1117	0.0167898
COG1508 Sigma factors are initiation factors that promote the attachment of RNA polymerase to specific initiation sites and are then released (By similarity)	COG1508	1028	0.00560283	2	480	0.00604121	1508	0.0057353	8	0.000247012	1	1164	0.0293072	1172	0.0162542	21	0.000669466	1	102	0.00528367	123	0.00242733	164	0.00572215	1	86	0.00312519	250	0.00908484	56	0.00179187	0	0	0	56	0.000841743
COG1510 Transcriptional regulator	COG1510	9643	0.0525565	0	0	0	9643	0.0366747	1653	0.0510388	0	0	0	1653	0.0229251	1591	0.05072	0	0	0	1591	0.0313974	1017	0.0354843	0	0	0	1017	0.0369571	784	0.0250862	0	0	0	784	0.0117844
COG1521 Catalyzes the phosphorylation of pantothenate (Pan), the first step in CoA biosynthesis (By similarity)	COG1521	546	0.00297582	0	0	0	546	0.00207658	7	0.000216135	0	0	0	7	9.70816e-05	16	0.00051007	0	0	0	16	0.00031575	82	0.00286108	0	0	0	82	0.00297983	31	0.00099193	1	44	0.00124729	75	0.00112733
COG1522 transcriptional regulator AsnC family	COG1522	25158	0.137117	4	2457	0.0309234	27615	0.105027	4471	0.138049	1	101	0.00254298	4572	0.0634081	4354	0.138803	2	361	0.0187001	4715	0.0930475	3255	0.113571	3	1442	0.0524014	4697	0.170686	3091	0.098905	3	629	0.0178306	3720	0.0559158
COG1548 H4MPT-linked C1 transfer pathway protein	COG1548	7402	0.0403426	1	82	0.00103204	7484	0.0284635	1183	0.0365269	0	0	0	1183	0.0164068	1205	0.0384146	0	0	0	1205	0.0237799	1014	0.0353796	1	635	0.0230755	1649	0.0599236	1023	0.0327337	1	82	0.0023245	1105	0.0166094
COG1581 Binds double-stranded DNA tightly but without sequence specificity. It is distributed uniformly and abundantly on the chromosome, suggesting a role in chromatin architecture. However, it does not significantly compact DNA. Binds rRNA and mRNA in vivo. May play a role in maintaining the structural and functional stability of RNA, and, perhaps, ribosomes (By similarity)	COG1581	3679	0.0200514	0	0	0	3679	0.0139922	770	0.0237749	0	0	0	770	0.010679	672	0.0214229	0	0	0	672	0.0132615	491	0.0171316	0	0	0	491	0.0178426	318	0.0101753	0	0	0	318	0.0047799
COG1594 DNA-dependent RNA polymerase catalyzes the transcription of DNA into RNA using the four ribonucleoside triphosphates as substrates (By similarity)	COG1594	4350	0.0237085	0	0	0	4350	0.0165441	819	0.0252878	1	282	0.0071002	1101	0.0152695	771	0.024579	1	305	0.0157992	1076	0.0212342	517	0.0180387	0	0	0	517	0.0187874	518	0.0165748	1	634	0.0179723	1152	0.0173159
COG1595 RNA Polymerase	COG1595	2051	0.0111784	3	569	0.00716135	2620	0.00996452	17	0.0005249	3	139	0.00349974	156	0.00216353	24	0.000765104	0	0	0	24	0.000473625	228	0.00795519	3	259	0.00941189	487	0.0176973	34	0.00108792	1	48	0.00136068	82	0.00123255
COG1609 Transcriptional regulator	COG1609	71	0.000386966	3	268	0.00337301	339	0.0012893	5	0.000154382	0	0	0	5	6.9344e-05	8	0.000255035	0	0	0	8	0.000157875	71	0.00247727	2	432	0.0156986	503	0.0182787	42	0.0013439	4	147	0.00416709	189	0.00284088
COG1644 DNA-dependent RNA polymerase catalyzes the transcription of DNA into RNA using the four ribonucleoside triphosphates as substrates	COG1644	2164	0.0117943	0	0	0	2164	0.00823024	414	0.0127829	0	0	0	414	0.00574168	409	0.0130387	0	0	0	409	0.00807135	368	0.0128399	0	0	0	368	0.0133729	356	0.0113912	0	0	0	356	0.00535108
COG1675 Transcription factor that plays a role in the activation of archaeal genes transcribed by RNA polymerase. Facilitates transcription initiation by enhancing TATA-box recognition by TATA-box-binding protein (Tbp), and transcription factor B (Tfb) and RNA polymerase recruitment. Not absolutely required for transcription in vitro, but particularly important in cases where Tbp or Tfb function …	COG1675	4670	0.0254526	0	0	0	4670	0.0177612	905	0.0279432	0	0	0	905	0.0125513	824	0.0262686	0	0	0	824	0.0162611	881	0.0307391	0	0	0	881	0.032015	810	0.0259182	1	80	0.0022678	890	0.0133777
COG1678 UPF0301 protein	COG1678	10	5.45023e-05	0	0	0	10	3.80325e-05	0	0	0	0	0	0	0	0	0	0	0	0	0	0	0	0	0	0	0	0	0	5	0.000159989	0	0	0	5	7.51556e-05
COG1695 Transcriptional regulator	COG1695	7232	0.039416	0	0	0	7232	0.0275051	1372	0.0423625	0	0	0	1372	0.019028	1255	0.0400086	0	0	0	1255	0.0247666	672	0.0234469	0	0	0	672	0.0244201	396	0.0126711	0	0	0	396	0.00595232
COG1709 Transcriptional regulator (XRE family	COG1709	6155	0.0335461	0	0	0	6155	0.023409	1148	0.0354462	0	0	0	1148	0.0159214	1058	0.0337284	0	0	0	1058	0.020879	1167	0.040718	0	0	0	1167	0.042408	1240	0.0396772	0	0	0	1240	0.0186386
COG1725 Transcriptional regulator, GntR family	COG1725	1186	0.00646397	1	50	0.000629292	1236	0.00470082	1	3.08765e-05	0	0	0	1	1.38688e-05	2	6.37587e-05	0	0	0	2	3.94687e-05	124	0.0043265	0	0	0	124	0.00450608	38	0.00121591	0	0	0	38	0.000571183
COG1733 transcription, DNA-dependent	COG1733	6543	0.0356608	0	0	0	6543	0.0248847	1177	0.0363416	0	0	0	1177	0.0163236	1193	0.0380321	0	0	0	1193	0.0235431	868	0.0302855	0	0	0	868	0.0315426	1058	0.0338536	0	0	0	1058	0.0159029
COG1737 Transcriptional regulator	COG1737	72	0.000392416	0	0	0	72	0.000273834	24	0.000741036	0	0	0	24	0.000332851	19	0.000605708	0	0	0	19	0.000374953	0	0	0	0	0	0	0	36	0.00115192	0	0	0	36	0.00054112
COG1747 Necessary for efficient RNA polymerase transcription elongation past template-encoded arresting sites. The arresting sites in DNA have the property of trapping a certain fraction of elongating RNA polymerases that pass through, resulting in locked ternary complexes. Cleavage of the nascent transcript by cleavage factors such as GreA or GreB allows the resumption of elongation from the new…	COG1747	0	0	1	662	0.00833183	662	0.00251775	0	0	0	0	0	0	0	0	0	0	0	0	0	0	0	0	0	0	0	0	0	0	0	0	0	0	0	0
COG1758 Promotes RNA polymerase assembly. Latches the N- and C- terminal regions of the beta' subunit thereby facilitating its interaction with the beta and alpha subunits (By similarity)	COG1758	2267	0.0123557	0	0	0	2267	0.00862197	464	0.0143267	0	0	0	464	0.00643512	452	0.0144095	0	0	0	452	0.00891993	375	0.0130842	0	0	0	375	0.0136273	351	0.0112312	0	0	0	351	0.00527592
COG1761 DNA-dependent RNA polymerase catalyzes the transcription of DNA into RNA using the four ribonucleoside triphosphates as substrates	COG1761	2204	0.0120123	0	0	0	2204	0.00838237	421	0.012999	0	0	0	421	0.00583876	395	0.0125923	0	0	0	395	0.00779507	346	0.0120723	0	0	0	346	0.0125734	395	0.0126391	0	0	0	395	0.00593729
COG1777 arsR family transcriptional regulator	COG1777	4519	0.0246296	0	0	0	4519	0.0171869	971	0.0299811	0	0	0	971	0.0134666	929	0.0296159	0	0	0	929	0.0183332	845	0.029483	0	0	0	845	0.0307068	910	0.0291179	0	0	0	910	0.0136783
COG1802 GntR Family Transcriptional Regulator	COG1802	637	0.00347179	2	207	0.00260527	844	0.00320994	43	0.00132769	0	0	0	43	0.000596358	30	0.00095638	0	0	0	30	0.000592031	87	0.00303553	2	466	0.0169341	553	0.0200957	42	0.0013439	0	0	0	42	0.000631307
COG1813 Factor 1	COG1813	3138	0.0171028	0	0	0	3138	0.0119346	647	0.0199771	0	0	0	647	0.00897311	668	0.0212954	0	0	0	668	0.0131826	573	0.0199926	0	0	0	573	0.0208225	660	0.0211185	0	0	0	660	0.00992054
COG1827 domain protein	COG1827	15	8.17534e-05	0	0	0	15	5.70488e-05	9	0.000277888	0	0	0	9	0.000124819	9	0.000286914	0	0	0	9	0.000177609	0	0	0	0	0	0	0	5	0.000159989	0	0	0	5	7.51556e-05
COG1842 Phage shock protein A	COG1842	3306	0.0180184	0	0	0	3306	0.0125735	692	0.0213665	0	0	0	692	0.00959721	689	0.0219649	0	0	0	689	0.013597	395	0.013782	0	0	0	395	0.014354	416	0.0133111	0	0	0	416	0.00625295
COG1846 Transcriptional regulator	COG1846	4981	0.0271476	1	179	0.00225287	5160	0.0196248	964	0.0297649	1	348	0.00876195	1312	0.0181959	938	0.0299028	1	464	0.0240355	1402	0.0276676	1311	0.0457423	0	0	0	1311	0.0476409	1801	0.0576279	2	817	0.0231599	2618	0.0393515
COG1958 small nuclear ribonucleoprotein	COG1958	4970	0.0270876	0	0	0	4970	0.0189022	956	0.0295179	0	0	0	956	0.0132586	966	0.0307955	0	0	0	966	0.0190634	943	0.0329024	0	0	0	943	0.034268	859	0.027486	0	0	0	859	0.0129117
COG1959 Transcriptional regulator, BadM Rrf2 family	COG1959	346	0.00188578	0	0	0	346	0.00131592	10	0.000308765	0	0	0	10	0.000138688	21	0.000669466	0	0	0	21	0.000414422	30	0.00104673	0	0	0	30	0.00109018	24	0.000767945	0	0	0	24	0.000360747
COG1974 Represses a number of genes involved in the response to DNA damage (SOS response), including recA and lexA. In the presence of single-stranded DNA, RecA interacts with LexA causing an autocatalytic cleavage which disrupts the DNA-binding part of LexA, leading to derepression of the SOS regulon and eventually DNA repair (By similarity)	COG1974	437	0.00238175	1	98	0.00123341	535	0.00203474	0	0	0	0	0	0	0	13	0.000414432	0	0	0	13	0.000256547	66	0.00230282	0	0	0	66	0.0023984	4	0.000127991	3	1091	0.0309272	1095	0.0164591
COG1996 DNA-dependent RNA polymerase catalyzes the transcription of DNA into RNA using the four ribonucleoside triphosphates as substrates	COG1996	1032	0.00562463	0	0	0	1032	0.00392496	190	0.00586653	0	0	0	190	0.00263507	174	0.00554701	0	0	0	174	0.00343378	174	0.00607106	0	0	0	174	0.00632305	184	0.00588758	0	0	0	184	0.00276573
COG2002 Transcriptional regulator AbrB family	COG2002	2051	0.0111784	0	0	0	2051	0.00780047	242	0.00747211	0	0	0	242	0.00335625	276	0.0087987	0	0	0	276	0.00544668	305	0.0106418	0	0	0	305	0.0110835	230	0.00735948	0	0	0	230	0.00345716
COG2005 Transcriptional regulator, ModE family	COG2005	260	0.00141706	0	0	0	260	0.000988845	7	0.000216135	0	0	0	7	9.70816e-05	5	0.000159397	0	0	0	5	9.86718e-05	13	0.000453585	0	0	0	13	0.000472412	160	0.00511964	0	0	0	160	0.00240498
COG2012 DNA-dependent RNA polymerase catalyzes the transcription of DNA into RNA using the four ribonucleoside triphosphates as substrates	COG2012	1539	0.0083879	0	0	0	1539	0.0058532	324	0.010004	0	0	0	324	0.00449349	296	0.00943629	0	0	0	296	0.00584137	407	0.0142007	0	0	0	407	0.0147901	434	0.013887	0	0	0	434	0.00652351
COG2093 DNA-directed RNA polymerase, subunit e'	COG2093	1495	0.00814809	0	0	0	1495	0.00568586	297	0.00917031	0	0	0	297	0.00411903	326	0.0103927	0	0	0	326	0.0064334	302	0.0105371	0	0	0	302	0.0109745	327	0.0104633	0	0	0	327	0.00491518
COG2101 General factor that plays a role in the activation of archaeal genes transcribed by RNA polymerase. Binds specifically to the TATA box promoter element which lies close to the position of transcription initiation (By similarity)	COG2101	9489	0.0517172	0	0	0	9489	0.036089	1875	0.0578934	0	0	0	1875	0.026004	1902	0.0606345	0	0	0	1902	0.0375348	1462	0.0510109	0	0	0	1462	0.0531281	1670	0.0534362	0	0	0	1670	0.025102
COG2183 domain protein	COG2183	13057	0.0711636	3	292	0.00367507	13349	0.0507696	2290	0.0707071	1	151	0.00380188	2441	0.0338537	2254	0.0718561	1	165	0.00854711	2419	0.0477374	1217	0.0424625	1	176	0.00639573	1393	0.0506207	984	0.0314858	3	253	0.00717193	1237	0.0185935
COG2186 GntR family transcriptional regulator	COG2186	14	7.63032e-05	0	0	0	14	5.32455e-05	24	0.000741036	0	0	0	24	0.000332851	17	0.000541949	0	0	0	17	0.000335484	4	0.000139565	0	0	0	4	0.000145357	16	0.000511964	0	0	0	16	0.000240498
COG2188 GntR family transcriptional regulator	COG2188	19	0.000103554	0	0	0	19	7.22618e-05	2	6.1753e-05	0	0	0	2	2.77376e-05	6	0.000191276	0	0	0	6	0.000118406	5	0.000174456	1	15	0.00054509	20	0.000726787	11	0.000351975	0	0	0	11	0.000165342
COG2207 Transcriptional Regulator AraC Family	COG2207	566	0.00308483	0	0	0	566	0.00215264	6	0.000185259	1	16	0.000402848	22	0.000305114	6	0.000191276	0	0	0	6	0.000118406	21	0.000732714	0	0	0	21	0.000763127	12	0.000383973	2	94	0.00266467	106	0.0015933
COG2344 Modulates transcription in response to changes in cellular NADH NAD( ) redox state (By similarity)	COG2344	427	0.00232725	1	140	0.00176202	567	0.00215644	9	0.000277888	1	39	0.000981942	48	0.000665702	7	0.000223155	1	52	0.00269364	59	0.00116433	52	0.00181434	0	0	0	52	0.00188965	13	0.00041597	0	0	0	13	0.000195405
COG2378 Transcriptional regulator	COG2378	857	0.00467084	2	254	0.00319681	1111	0.00422541	0	0	0	0	0	0	0	0	0	0	0	0	0	0	55	0.00191901	1	72	0.00261643	127	0.0046151	14	0.000447968	0	0	0	14	0.000210436
COG2390 Transcriptional regulator	COG2390	660	0.00359715	0	0	0	660	0.00251015	0	0	0	0	0	0	0	0	0	0	0	0	0	0	79	0.0027564	0	0	0	79	0.00287081	17	0.000543961	0	0	0	17	0.000255529
COG2508 Transcriptional regulator	COG2508	36	0.000196208	1	45	0.000566363	81	0.000308063	20	0.00061753	0	0	0	20	0.000277376	14	0.000446311	0	0	0	14	0.000276281	0	0	2	228	0.00828537	228	0.00828537	13	0.00041597	1	208	0.00589629	221	0.00332188
COG2522 Transcriptional regulator	COG2522	2342	0.0127644	0	0	0	2342	0.00890721	520	0.0160558	0	0	0	520	0.00721177	449	0.0143138	0	0	0	449	0.00886073	261	0.00910659	0	0	0	261	0.00948457	345	0.0110392	0	0	0	345	0.00518574
COG2524 signal transduction protein with cbs domains	COG2524	6581	0.0358679	0	0	0	6581	0.0250292	1270	0.0392131	0	0	0	1270	0.0176134	1284	0.0409331	0	0	0	1284	0.0253389	1285	0.0448351	0	0	0	1285	0.0466961	1460	0.0467167	0	0	0	1460	0.0219454
COG2740 Nucleic-acid-binding protein implicated in transcription termination	COG2740	140	0.000763032	0	0	0	140	0.000532455	2	6.1753e-05	0	0	0	2	2.77376e-05	3	9.5638e-05	0	0	0	3	5.92031e-05	20	0.000697823	0	0	0	20	0.000726787	9	0.00028798	0	0	0	9	0.00013528
COG2771 Transcriptional regulator, luxr family	COG2771	6	3.27014e-05	0	0	0	6	2.28195e-05	0	0	0	0	0	0	0	6	0.000191276	0	0	0	6	0.000118406	0	0	0	0	0	0	0	5	0.000159989	0	0	0	5	7.51556e-05
COG2865 Transcriptional regulator	COG2865	25292	0.137847	9	24596	0.309561	49888	0.189737	5159	0.159292	3	3571	0.0899107	8730	0.121075	4738	0.151044	5	6228	0.322615	10966	0.216407	5574	0.194483	4	12326	0.447919	17900	0.650475	4977	0.159253	8	12692	0.359787	17669	0.265585
COG2901 Activates ribosomal RNA transcription. Plays a direct role in upstream activation of rRNA promoters (By similarity)	COG2901	4	2.18009e-05	0	0	0	4	1.5213e-05	0	0	0	0	0	0	0	0	0	0	0	0	0	0	0	0	0	0	0	0	0	6	0.000191986	0	0	0	6	9.01867e-05
COG2909 positive regulation of carbohydrate metabolic process	COG2909	6250	0.0340639	2	2221	0.0279532	8471	0.0322173	17	0.0005249	1	1422	0.0358031	1439	0.0199572	8	0.000255035	0	0	0	8	0.000157875	515	0.017969	1	763	0.0277269	1278	0.0464417	409	0.0130871	0	0	0	409	0.00614773
COG2932 Repressor	COG2932	12	6.54027e-05	0	0	0	12	4.5639e-05	0	0	2	101	0.00254298	101	0.00140075	0	0	1	61	0.00315984	61	0.0012038	6	0.000209347	0	0	0	6	0.000218036	5	0.000159989	0	0	0	5	7.51556e-05
COG2944 Transcriptional regulator	COG2944	3	1.63507e-05	0	0	0	3	1.14098e-05	3	9.26294e-05	0	0	0	3	4.16064e-05	1	3.18793e-05	0	0	0	1	1.97344e-05	0	0	0	0	0	0	0	0	0	0	0	0	0	0
COG3070 TfoX domain-containing protein	COG3070	267	0.00145521	0	0	0	267	0.00101547	0	0	0	0	0	0	0	0	0	0	0	0	0	0	15	0.000523367	0	0	0	15	0.00054509	3	9.59932e-05	0	0	0	3	4.50934e-05
COG3172 Nicotinamide-nucleotide adenylyltransferase	COG3172	0	0	0	0	0	0	0	0	0	1	224	0.00563987	224	0.00310661	0	0	0	0	0	0	0	0	0	0	0	0	0	0	0	0	1	274	0.00776723	274	0.00411853
COG3283 Transcriptional regulator	COG3283	6	3.27014e-05	0	0	0	6	2.28195e-05	0	0	0	0	0	0	0	0	0	0	0	0	0	0	0	0	0	0	0	0	0	0	0	0	0	0	0	0
COG3284 Transcriptional regulator	COG3284	657	0.0035808	2	395	0.00497141	1052	0.00400102	23	0.000710159	1	198	0.00498525	221	0.003065	50	0.00159397	1	1978	0.102462	2028	0.0400213	96	0.00334955	0	0	0	96	0.00348858	20	0.000639955	0	0	0	20	0.000300622
COG3311 Phage transcriptional regulator AlpA	COG3311	2	1.09005e-05	0	0	0	2	7.6065e-06	0	0	0	0	0	0	0	0	0	0	0	0	0	0	0	0	0	0	0	0	0	6	0.000191986	0	0	0	6	9.01867e-05
COG3355 Transcriptional regulator	COG3355	2	1.09005e-05	0	0	0	2	7.6065e-06	11	0.000339641	0	0	0	11	0.000152557	0	0	0	0	0	0	0	0	0	0	0	0	0	0	306	0.0097913	0	0	0	306	0.00459952
COG3398 Transcriptional regulator	COG3398	1127	0.00614241	1	1228	0.0154554	2355	0.00895666	346	0.0106833	1	255	0.00642039	601	0.00833515	332	0.0105839	1	291	0.015074	623	0.0122945	536	0.0187017	1	246	0.00893948	782	0.0284174	1297	0.0415011	2	1709	0.048446	3006	0.0451835
COG3449 Transcriptional regulator	COG3449	9	4.9052e-05	0	0	0	9	3.42293e-05	0	0	0	0	0	0	0	0	0	0	0	0	0	0	2	6.97823e-05	0	0	0	2	7.26787e-05	3	9.59932e-05	0	0	0	3	4.50934e-05
COG3561 anti-repressor protein	COG3561	1	5.45023e-06	0	0	0	1	3.80325e-06	0	0	0	0	0	0	0	0	0	0	0	0	0	0	0	0	0	0	0	0	0	0	0	0	0	0	0	0
COG3604 Transcriptional regulator	COG3604	118	0.000643127	1	347	0.00436729	465	0.00176851	24	0.000741036	1	43	0.00108265	67	0.000929209	30	0.00095638	0	0	0	30	0.000592031	80	0.00279129	0	0	0	80	0.00290715	52	0.00166388	0	0	0	52	0.000781618
COG3609 CopG Arc MetJ family	COG3609	5539	0.0301888	0	0	0	5539	0.0210662	1192	0.0368048	0	0	0	1192	0.0165316	1131	0.0360555	0	0	0	1131	0.0223196	773	0.0269709	0	0	0	773	0.0280903	671	0.0214705	0	0	0	671	0.0100859
COG3617 Antirepressor	COG3617	5	2.72511e-05	0	0	0	5	1.90163e-05	0	0	0	0	0	0	0	0	0	0	0	0	0	0	0	0	0	0	0	0	0	0	0	0	0	0	0	0
COG3620 transcriptional regulator XRE family	COG3620	614	0.00334644	0	0	0	614	0.0023352	140	0.00432271	0	0	0	140	0.00194163	154	0.00490942	0	0	0	154	0.00303909	332	0.0115839	0	0	0	332	0.0120647	575	0.0183987	0	0	0	575	0.00864289
COG3629 Transcriptional regulator	COG3629	3713	0.0202367	1	96	0.00120824	3809	0.0144866	271	0.00836753	1	5130	0.129163	5401	0.0749054	282	0.00898998	1	3049	0.15794	3331	0.0657352	423	0.014759	1	2431	0.088341	2854	0.103713	122	0.00390372	2	56	0.00158746	178	0.00267554
COG3636 addiction module antidote protein	COG3636	2	1.09005e-05	0	0	0	2	7.6065e-06	0	0	0	0	0	0	0	0	0	0	0	0	0	0	0	0	0	0	0	0	0	0	0	0	0	0	0	0
COG3645 Antirepressor	COG3645	63	0.000343364	0	0	0	63	0.000239605	11	0.000339641	0	0	0	11	0.000152557	24	0.000765104	0	0	0	24	0.000473625	22	0.000767606	0	0	0	22	0.000799466	25	0.000799943	0	0	0	25	0.000375778
COG3655 Transcriptional regulator	COG3655	46	0.00025071	0	0	0	46	0.00017495	2	6.1753e-05	0	0	0	2	2.77376e-05	10	0.000318793	0	0	0	10	0.000197344	5	0.000174456	0	0	0	5	0.000181697	16	0.000511964	0	0	0	16	0.000240498
COG3682 transcriptional repressor, copy family	COG3682	209	0.0011391	0	0	0	209	0.000794879	0	0	0	0	0	0	0	0	0	1	41	0.00212383	41	0.000809109	22	0.000767606	0	0	0	22	0.000799466	3	9.59932e-05	0	0	0	3	4.50934e-05
COG3708 Transcriptional regulator	COG3708	0	0	0	0	0	0	0	0	0	0	0	0	0	0	0	0	0	0	0	0	0	0	0	1	96	0.00348858	96	0.00348858	0	0	0	0	0	0	0
COG3800 Transcriptional regulator	COG3800	25	0.000136256	0	0	0	25	9.50813e-05	2	6.1753e-05	0	0	0	2	2.77376e-05	9	0.000286914	0	0	0	9	0.000177609	0	0	0	0	0	0	0	5	0.000159989	0	0	0	5	7.51556e-05
COG3829 Transcriptional regulator	COG3829	10510	0.0572819	21	7323	0.0921662	17833	0.0678234	62	0.00191434	9	15749	0.396528	15811	0.21928	65	0.00207216	4	6044	0.313083	6109	0.120557	1310	0.0457074	14	11033	0.400932	12343	0.448537	164	0.00524763	5	596	0.0168951	760	0.0114237
COG3835 regulatoR	COG3835	14	7.63032e-05	0	0	0	14	5.32455e-05	14	0.000432271	0	0	0	14	0.000194163	7	0.000223155	0	0	0	7	0.000138141	0	0	0	0	0	0	0	9	0.00028798	0	0	0	9	0.00013528
COG3901 Regulatory protein NosR	COG3901	10	5.45023e-05	0	0	0	10	3.80325e-05	2	6.1753e-05	0	0	0	2	2.77376e-05	14	0.000446311	0	0	0	14	0.000276281	0	0	0	0	0	0	0	12	0.000383973	0	0	0	12	0.000180373
COG3903 transcriptional regulator	COG3903	0	0	0	0	0	0	0	0	0	0	0	0	0	0	0	0	0	0	0	0	0	1	3.48912e-05	0	0	0	1	3.63394e-05	3	9.59932e-05	0	0	0	3	4.50934e-05
COG4008 Methanogenesis marker protein 9	COG4008	6546	0.0356772	0	0	0	6546	0.0248961	1273	0.0393058	0	0	0	1273	0.017655	1314	0.0418895	0	0	0	1314	0.025931	1111	0.0387641	1	403	0.0146448	1514	0.0550178	1243	0.0397732	1	147	0.00416709	1390	0.0208933
COG4109 domain protein	COG4109	1	5.45023e-06	0	0	0	1	3.80325e-06	0	0	0	0	0	0	0	0	0	0	0	0	0	0	0	0	0	0	0	0	0	0	0	0	0	0	0	0
COG4219 Peptidase m56	COG4219	1204	0.00656207	1	114	0.00143479	1318	0.00501268	0	0	0	0	0	0	0	0	0	0	0	0	0	0	129	0.00450096	3	277	0.010066	406	0.0147538	15	0.000479966	0	0	0	15	0.000225467
COG4463 transcriptional regulator, ctsr	COG4463	276	0.00150426	0	0	0	276	0.0010497	2	6.1753e-05	0	0	0	2	2.77376e-05	8	0.000255035	0	0	0	8	0.000157875	32	0.00111652	0	0	0	32	0.00116286	3	9.59932e-05	0	0	0	3	4.50934e-05
COG4465 DNA-binding protein that represses the expression of many genes that are induced as cells make the transition from rapid exponential growth to stationary phase. It is a GTP-binding protein that senses the intracellular GTP concentration as an indicator of nutritional limitations. At low GTP concentration it no longer binds GTP and stop to act as a transcriptional repressor (By similarity)	COG4465	528	0.00287772	0	0	0	528	0.00200812	12	0.000370518	0	0	0	12	0.000166426	10	0.000318793	0	0	0	10	0.000197344	66	0.00230282	0	0	0	66	0.0023984	30	0.000959932	0	0	0	30	0.000450934
COG4725 MT-A70 family	COG4725	0	0	0	0	0	0	0	0	0	1	84	0.00211495	84	0.00116498	0	0	0	0	0	0	0	0	0	0	0	0	0	0	0	0	0	0	0	0	0
COG4738 Transcriptional regulator	COG4738	10228	0.0557449	0	0	0	10228	0.0388997	1581	0.0488157	0	0	0	1581	0.0219266	1534	0.0489029	0	0	0	1534	0.0302725	980	0.0341933	0	0	0	980	0.0356126	1449	0.0463647	0	0	0	1449	0.0217801
COG4742 Transcriptional regulator	COG4742	172	0.000937439	1	1682	0.0211694	1854	0.00705123	136	0.0041992	0	0	0	136	0.00188616	43	0.00137081	1	579	0.0299926	622	0.0122748	65	0.00226793	0	0	0	65	0.00236206	3303	0.105688	2	2357	0.0668152	5660	0.0850761
COG4800 Transcriptional regulator (XRE family	COG4800	3228	0.0175933	0	0	0	3228	0.0122769	704	0.021737	0	0	0	704	0.00976363	627	0.0199884	0	0	0	627	0.0123734	575	0.0200624	1	1397	0.0507661	1972	0.0716612	713	0.0228144	1	85	0.00240954	798	0.0119948
COG4860 Transcriptional regulator, arsR family	COG4860	3641	0.0198443	0	0	0	3641	0.0138476	794	0.0245159	0	0	0	794	0.0110118	733	0.0233676	0	0	0	733	0.0144653	751	0.0262033	0	0	0	751	0.0272909	823	0.0263341	0	0	0	823	0.0123706
COG4941 rna polymerase	COG4941	0	0	0	0	0	0	0	0	0	0	0	0	0	0	0	0	0	0	0	0	0	0	0	0	0	0	0	0	2	6.39955e-05	0	0	0	2	3.00622e-05
COG4957 Transcriptional regulator	COG4957	7	3.81516e-05	2	715	0.00899888	722	0.00274595	0	0	2	1243	0.0312963	1243	0.0172389	0	0	1	66	0.00341885	66	0.00130247	15	0.000523367	1	122	0.0044334	137	0.00497849	3	9.59932e-05	0	0	0	3	4.50934e-05
COG4978 nucleic acid binding transcription factor activity	COG4978	8834	0.0481473	0	0	0	8834	0.0335979	1799	0.0555468	0	0	0	1799	0.02495	1660	0.0529197	0	0	0	1660	0.032759	1229	0.0428812	0	0	0	1229	0.0446611	1190	0.0380773	0	0	0	1190	0.017887
COG5007 BolA family	COG5007	1	5.45023e-06	0	0	0	1	3.80325e-06	0	0	0	0	0	0	0	0	0	0	0	0	0	0	0	0	0	0	0	0	0	1	3.19977e-05	0	0	0	1	1.50311e-05
COG5641 Transcription factor	COG5641	12	6.54027e-05	0	0	0	12	4.5639e-05	0	0	0	0	0	0	0	2	6.37587e-05	0	0	0	2	3.94687e-05	0	0	0	0	0	0	0	10	0.000319977	0	0	0	10	0.000150311
COG5662 sigma factor antagonist activity	COG5662	0	0	0	0	0	0	0	0	0	0	0	0	0	0	0	0	0	0	0	0	0	0	0	0	0	0	0	0	1	3.19977e-05	0	0	0	1	1.50311e-05
ENOG410XNR2 Transcriptional regulator	ENOG410XNR2	36	0.000196208	0	0	0	36	0.000136917	0	0	0	0	0	0	0	18	0.000573828	0	0	0	18	0.000355219	0	0	0	0	0	0	0	14	0.000447968	0	0	0	14	0.000210436
ENOG410XNYY LysR family Transcriptional regulator	ENOG410XNYY	2	1.09005e-05	0	0	0	2	7.6065e-06	0	0	0	0	0	0	0	0	0	0	0	0	0	0	6	0.000209347	0	0	0	6	0.000218036	0	0	0	0	0	0	0
ENOG410XP36 LysR family (Transcriptional regulator	ENOG410XP36	0	0	0	0	0	0	0	0	0	0	0	0	0	0	2	6.37587e-05	0	0	0	2	3.94687e-05	0	0	0	0	0	0	0	0	0	0	0	0	0	0
ENOG410XP61 Transcriptional regulator	ENOG410XP61	22	0.000119905	0	0	0	22	8.36715e-05	0	0	0	0	0	0	0	20	0.000637587	0	0	0	20	0.000394687	0	0	0	0	0	0	0	20	0.000639955	0	0	0	20	0.000300622
ENOG410XP86 LysR family Transcriptional regulator	ENOG410XP86	15	8.17534e-05	0	0	0	15	5.70488e-05	0	0	0	0	0	0	0	2	6.37587e-05	0	0	0	2	3.94687e-05	0	0	0	0	0	0	0	2	6.39955e-05	0	0	0	2	3.00622e-05
ENOG410XPBW Transcriptional regulator	ENOG410XPBW	0	0	0	0	0	0	0	0	0	0	0	0	0	0	0	0	0	0	0	0	0	0	0	0	0	0	0	0	0	0	0	0	0	0	0
ENOG410XPGX AraC family transcriptional regulator	ENOG410XPGX	11	5.99525e-05	0	0	0	11	4.18358e-05	2	6.1753e-05	0	0	0	2	2.77376e-05	10	0.000318793	0	0	0	10	0.000197344	0	0	0	0	0	0	0	4	0.000127991	0	0	0	4	6.01245e-05
ENOG410XPJX LysR family (Transcriptional regulator	ENOG410XPJX	5	2.72511e-05	0	0	0	5	1.90163e-05	0	0	0	0	0	0	0	4	0.000127517	0	0	0	4	7.89375e-05	0	0	0	0	0	0	0	6	0.000191986	0	0	0	6	9.01867e-05
ENOG410XPSK Transcriptional regulator	ENOG410XPSK	0	0	0	0	0	0	0	0	0	0	0	0	0	0	0	0	0	0	0	0	0	0	0	0	0	0	0	0	0	0	1	65	0.00184259	65	0.000977023
ENOG410XQG7 Transcriptional regulator	ENOG410XQG7	10	5.45023e-05	0	0	0	10	3.80325e-05	0	0	0	0	0	0	0	0	0	0	0	0	0	0	2	6.97823e-05	0	0	0	2	7.26787e-05	9	0.00028798	0	0	0	9	0.00013528
ENOG410XQGJ LysR family (Transcriptional regulator	ENOG410XQGJ	9	4.9052e-05	0	0	0	9	3.42293e-05	0	0	0	0	0	0	0	0	0	0	0	0	0	0	0	0	0	0	0	0	0	11	0.000351975	0	0	0	11	0.000165342
ENOG410XQRW AraC Family Transcriptional Regulator	ENOG410XQRW	1	5.45023e-06	0	0	0	1	3.80325e-06	0	0	0	0	0	0	0	0	0	0	0	0	0	0	0	0	0	0	0	0	0	0	0	0	0	0	0	0
ENOG410XQTE Transcriptional regulator (AraC family)	ENOG410XQTE	0	0	0	0	0	0	0	1	3.08765e-05	0	0	0	1	1.38688e-05	0	0	0	0	0	0	0	0	0	0	0	0	0	0	0	0	0	0	0	0	0
ENOG410XR3F Transcriptional regulator	ENOG410XR3F	0	0	0	0	0	0	0	0	0	0	0	0	0	0	0	0	0	0	0	0	0	0	0	0	0	0	0	0	1	3.19977e-05	0	0	0	1	1.50311e-05
ENOG410XR9D nucleic acid binding transcription factor activity	ENOG410XR9D	4	2.18009e-05	0	0	0	4	1.5213e-05	0	0	0	0	0	0	0	0	0	0	0	0	0	0	0	0	0	0	0	0	0	0	0	0	0	0	0	0
ENOG410XRAF LysR family (Transcriptional regulator	ENOG410XRAF	21	0.000114455	0	0	0	21	7.98683e-05	0	0	0	0	0	0	0	10	0.000318793	0	0	0	10	0.000197344	0	0	0	0	0	0	0	16	0.000511964	0	0	0	16	0.000240498
ENOG410XRI9 Transcriptional regulator	ENOG410XRI9	59	0.000321563	2	1027	0.0129257	1086	0.00413033	16	0.000494024	1	1021	0.0257067	1037	0.0143819	5	0.000159397	1	692	0.0358461	697	0.0137549	40	0.00139565	1	4261	0.154842	4301	0.156296	82	0.00262381	2	4433	0.125665	4515	0.0678655
ENOG410XRIM LysR family (Transcriptional regulator	ENOG410XRIM	2	1.09005e-05	0	0	0	2	7.6065e-06	0	0	0	0	0	0	0	0	0	0	0	0	0	0	0	0	0	0	0	0	0	0	0	0	0	0	0	0
ENOG410XRKS AraC family transcriptional regulator	ENOG410XRKS	4	2.18009e-05	0	0	0	4	1.5213e-05	0	0	0	0	0	0	0	0	0	0	0	0	0	0	0	0	0	0	0	0	0	1	3.19977e-05	0	0	0	1	1.50311e-05
ENOG410XRKV AraC family transcriptional regulator	ENOG410XRKV	0	0	1	350	0.00440505	350	0.00133114	0	0	0	0	0	0	0	0	0	0	0	0	0	0	0	0	0	0	0	0	0	0	0	0	0	0	0	0
ENOG410XS6G TRANSCRIPTIONal REGULATOR, lysR family	ENOG410XS6G	1	5.45023e-06	0	0	0	1	3.80325e-06	0	0	0	0	0	0	0	2	6.37587e-05	0	0	0	2	3.94687e-05	0	0	0	0	0	0	0	4	0.000127991	0	0	0	4	6.01245e-05
ENOG410XSCA Transcriptional regulator	ENOG410XSCA	0	0	0	0	0	0	0	19	0.000586653	0	0	0	19	0.000263507	0	0	0	0	0	0	0	2	6.97823e-05	0	0	0	2	7.26787e-05	384	0.0122871	0	0	0	384	0.00577195
ENOG410XSTJ Tetr family transcriptional regulator	ENOG410XSTJ	0	0	0	0	0	0	0	0	0	0	0	0	0	0	0	0	0	0	0	0	0	0	0	0	0	0	0	0	0	0	0	0	0	0	0
ENOG410XSUY transcriptional Regulator LysR family	ENOG410XSUY	2	1.09005e-05	0	0	0	2	7.6065e-06	0	0	0	0	0	0	0	0	0	0	0	0	0	0	0	0	0	0	0	0	0	2	6.39955e-05	0	0	0	2	3.00622e-05
ENOG410XTSU HTH_XRE	ENOG410XTSU	2	1.09005e-05	0	0	0	2	7.6065e-06	0	0	0	0	0	0	0	0	0	0	0	0	0	0	0	0	0	0	0	0	0	0	0	0	0	0	0	0
ENOG410XUB6 Transcriptional regulator, MarR Family	ENOG410XUB6	7	3.81516e-05	0	0	0	7	2.66228e-05	15	0.000463147	0	0	0	15	0.000208032	2	6.37587e-05	0	0	0	2	3.94687e-05	19	0.000662932	0	0	0	19	0.000690448	336	0.0107512	0	0	0	336	0.00505046
ENOG410XUC3 Transcriptional regulator	ENOG410XUC3	1	5.45023e-06	0	0	0	1	3.80325e-06	0	0	0	0	0	0	0	0	0	0	0	0	0	0	3	0.000104673	0	0	0	3	0.000109018	0	0	0	0	0	0	0
ENOG410XUEY Transcriptional regulator, luxr family	ENOG410XUEY	0	0	0	0	0	0	0	0	0	0	0	0	0	0	0	0	0	0	0	0	0	1	3.48912e-05	0	0	0	1	3.63394e-05	0	0	0	0	0	0	0
ENOG410XUF9 TetR family transcriptional Regulator	ENOG410XUF9	432	0.0023545	3	763	0.009603	1195	0.00454488	24	0.000741036	2	80	0.00201424	104	0.00144235	10	0.000318793	0	0	0	10	0.000197344	31	0.00108163	1	123	0.00446974	154	0.00559626	290	0.00927934	0	0	0	290	0.00435902
ENOG410XUJS anti-sigma28 factor FlgM	ENOG410XUJS	0	0	0	0	0	0	0	0	0	0	0	0	0	0	0	0	0	0	0	0	0	1	3.48912e-05	0	0	0	1	3.63394e-05	1	3.19977e-05	0	0	0	1	1.50311e-05
ENOG410XUQV Transcriptional regulator, arsR family	ENOG410XUQV	0	0	0	0	0	0	0	6	0.000185259	0	0	0	6	8.32128e-05	0	0	0	0	0	0	0	3	0.000104673	0	0	0	3	0.000109018	68	0.00217585	0	0	0	68	0.00102212
ENOG410XVFN HTH_XRE	ENOG410XVFN	0	0	0	0	0	0	0	0	0	0	0	0	0	0	0	0	0	0	0	0	0	0	0	0	0	0	0	0	0	0	0	0	0	0	0
ENOG410XVV5	ENOG410XVV5	1567	0.0085405	0	0	0	1567	0.00595969	392	0.0121036	0	0	0	392	0.00543657	330	0.0105202	0	0	0	330	0.00651234	203	0.00708291	0	0	0	203	0.00737689	206	0.00659153	0	0	0	206	0.00309641
ENOG410XWG9	ENOG410XWG9	2	1.09005e-05	0	0	0	2	7.6065e-06	2	6.1753e-05	0	0	0	2	2.77376e-05	0	0	0	0	0	0	0	2	6.97823e-05	0	0	0	2	7.26787e-05	7	0.000223984	0	0	0	7	0.000105218
ENOG410XXBZ Functions in complex with FlhD as a master transcriptional regulator that regulates transcription of several flagellar and non-flagellar operons by binding to their promoter region	ENOG410XXBZ	6	3.27014e-05	0	0	0	6	2.28195e-05	0	0	0	0	0	0	0	7	0.000223155	0	0	0	7	0.000138141	0	0	0	0	0	0	0	0	0	0	0	0	0	0
ENOG410XXT9 merR family transcriptional regulator	ENOG410XXT9	6	3.27014e-05	0	0	0	6	2.28195e-05	0	0	0	0	0	0	0	1	3.18793e-05	0	0	0	1	1.97344e-05	2	6.97823e-05	0	0	0	2	7.26787e-05	0	0	0	0	0	0	0
ENOG410XZ1Y LysR family (Transcriptional regulator	ENOG410XZ1Y	2	1.09005e-05	0	0	0	2	7.6065e-06	0	0	0	0	0	0	0	8	0.000255035	0	0	0	8	0.000157875	0	0	0	0	0	0	0	0	0	0	0	0	0	0
ENOG410XZNE Promotes RNA polymerase assembly. Latches the N- and C- terminal regions of the beta' subunit thereby facilitating its interaction with the beta and alpha subunits (By similarity)	ENOG410XZNE	0	0	0	0	0	0	0	0	0	0	0	0	0	0	1	3.18793e-05	0	0	0	1	1.97344e-05	0	0	0	0	0	0	0	0	0	0	0	0	0	0
ENOG410Y03E	ENOG410Y03E	2150	0.011718	0	0	0	2150	0.00817699	366	0.0113008	0	0	0	366	0.00507598	399	0.0127199	0	0	0	399	0.00787401	208	0.00725736	0	0	0	208	0.00755859	140	0.00447968	0	0	0	140	0.00210436
ENOG410Y0NN HTH_XRE	ENOG410Y0NN	221	0.0012045	0	0	0	221	0.000840518	0	0	0	0	0	0	0	0	0	0	0	0	0	0	25	0.000872279	0	0	0	25	0.000908484	2	6.39955e-05	0	0	0	2	3.00622e-05
ENOG410Y252 transcriptional regulator antitoxin, MazE	ENOG410Y252	266	0.00144976	0	0	0	266	0.00101166	0	0	0	0	0	0	0	0	0	0	0	0	0	0	15	0.000523367	0	0	0	15	0.00054509	2	6.39955e-05	0	0	0	2	3.00622e-05
ENOG410Y26U family Transcriptional regulator	ENOG410Y26U	5	2.72511e-05	0	0	0	5	1.90163e-05	2	6.1753e-05	0	0	0	2	2.77376e-05	3	9.5638e-05	0	0	0	3	5.92031e-05	0	0	0	0	0	0	0	1	3.19977e-05	0	0	0	1	1.50311e-05
ENOG410Y277 LysR family (Transcriptional regulator	ENOG410Y277	0	0	0	0	0	0	0	3	9.26294e-05	0	0	0	3	4.16064e-05	0	0	0	0	0	0	0	2	6.97823e-05	0	0	0	2	7.26787e-05	0	0	0	0	0	0	0
ENOG410Y56K CopG domain protein DNA-binding domain protein	ENOG410Y56K	1859	0.010132	0	0	0	1859	0.00707024	308	0.00950996	0	0	0	308	0.00427159	326	0.0103927	0	0	0	326	0.0064334	138	0.00481498	0	0	0	138	0.00501483	119	0.00380773	0	0	0	119	0.0017887
ENOG410Y6P8 rna polymerase	ENOG410Y6P8	8	4.36018e-05	0	0	0	8	3.0426e-05	3	9.26294e-05	0	0	0	3	4.16064e-05	1	3.18793e-05	0	0	0	1	1.97344e-05	0	0	0	0	0	0	0	3	9.59932e-05	0	0	0	3	4.50934e-05
ENOG410Y8S5 Toxin-antitoxin system, antitoxin component, AbrB famil	ENOG410Y8S5	0	0	0	0	0	0	0	0	0	0	0	0	0	0	0	0	0	0	0	0	0	0	0	0	0	0	0	0	0	0	0	0	0	0	0
ENOG410Y9KJ	ENOG410Y9KJ	6902	0.0376175	0	0	0	6902	0.02625	1242	0.0383486	0	0	0	1242	0.017225	1117	0.0356092	0	0	0	1117	0.0220433	570	0.019888	0	0	0	570	0.0207134	388	0.0124151	0	0	0	388	0.00583207
ENOG410YAT3 transcriptional regulator, LuxR family	ENOG410YAT3	0	0	0	0	0	0	0	0	0	0	0	0	0	0	0	0	0	0	0	0	0	1	3.48912e-05	0	0	0	1	3.63394e-05	0	0	0	0	0	0	0
ENOG410YE6G transcriptional regulator, lysr family	ENOG410YE6G	2	1.09005e-05	0	0	0	2	7.6065e-06	0	0	0	0	0	0	0	0	0	0	0	0	0	0	0	0	0	0	0	0	0	0	0	0	0	0	0	0
ENOG410YIVT GntR Family Transcriptional Regulator	ENOG410YIVT	1	5.45023e-06	0	0	0	1	3.80325e-06	0	0	0	0	0	0	0	0	0	0	0	0	0	0	1	3.48912e-05	0	0	0	1	3.63394e-05	0	0	0	0	0	0	0
ENOG410YMP0 transcriptional Regulator LysR family	ENOG410YMP0	0	0	0	0	0	0	0	0	0	0	0	0	0	0	0	0	0	0	0	0	0	0	0	0	0	0	0	0	0	0	0	0	0	0	0
ENOG410YQNJ Transcriptional regulator	ENOG410YQNJ	0	0	1	393	0.00494624	393	0.00149468	0	0	0	0	0	0	0	0	0	0	0	0	0	0	2	6.97823e-05	0	0	0	2	7.26787e-05	0	0	1	188	0.00532934	188	0.00282585
ENOG410YS4W	ENOG410YS4W	2884	0.0157185	0	0	0	2884	0.0109686	614	0.0189582	0	0	0	614	0.00851544	529	0.0168642	0	0	0	529	0.0104395	292	0.0101882	0	0	0	292	0.0106111	216	0.00691151	0	0	0	216	0.00324672
ENOG410YSN1 Transcriptional regulator CII	ENOG410YSN1	0	0	0	0	0	0	0	0	0	0	0	0	0	0	2	6.37587e-05	0	0	0	2	3.94687e-05	5	0.000174456	0	0	0	5	0.000181697	0	0	0	0	0	0	0
ENOG410YXRV Fis family Transcriptional regulator	ENOG410YXRV	275	0.00149881	1	625	0.00786615	900	0.00342293	72	0.00222311	0	0	0	72	0.000998553	88	0.00280538	0	0	0	88	0.00173662	203	0.00708291	0	0	0	203	0.00737689	157	0.00502364	0	0	0	157	0.00235989
ENOG410YYKH PAS PAC sensor protein	ENOG410YYKH	2609	0.0142196	0	0	0	2609	0.00992268	525	0.0162102	0	0	0	525	0.00728112	494	0.0157484	0	0	0	494	0.00974878	304	0.0106069	0	0	0	304	0.0110472	241	0.00771145	1	83	0.00235285	324	0.00487008
ENOG410Z66X	ENOG410Z66X	4	2.18009e-05	0	0	0	4	1.5213e-05	2	6.1753e-05	0	0	0	2	2.77376e-05	3	9.5638e-05	0	0	0	3	5.92031e-05	0	0	0	0	0	0	0	3	9.59932e-05	0	0	0	3	4.50934e-05
ENOG410Z866	ENOG410Z866	0	0	0	0	0	0	0	2	6.1753e-05	0	0	0	2	2.77376e-05	0	0	0	0	0	0	0	1	3.48912e-05	0	0	0	1	3.63394e-05	105	0.00335976	0	0	0	105	0.00157827
ENOG410Z8GQ transcriptional regulator, merr family	ENOG410Z8GQ	2	1.09005e-05	0	0	0	2	7.6065e-06	0	0	0	0	0	0	0	6	0.000191276	0	0	0	6	0.000118406	0	0	0	0	0	0	0	0	0	0	0	0	0	0
ENOG410ZCVR HTH_XRE	ENOG410ZCVR	0	0	0	0	0	0	0	0	0	0	0	0	0	0	0	0	0	0	0	0	0	4	0.000139565	0	0	0	4	0.000145357	0	0	0	0	0	0	0
ENOG410ZDZ4	ENOG410ZDZ4	7	3.81516e-05	0	0	0	7	2.66228e-05	0	0	0	0	0	0	0	2	6.37587e-05	0	0	0	2	3.94687e-05	2	6.97823e-05	0	0	0	2	7.26787e-05	16	0.000511964	0	0	0	16	0.000240498
ENOG410ZH5U HTH_XRE	ENOG410ZH5U	2	1.09005e-05	0	0	0	2	7.6065e-06	0	0	0	0	0	0	0	0	0	0	0	0	0	0	2	6.97823e-05	0	0	0	2	7.26787e-05	6	0.000191986	0	0	0	6	9.01867e-05
ENOG410ZID3 Transcriptional regulator, TraR DksA family	ENOG410ZID3	0	0	0	0	0	0	0	0	0	0	0	0	0	0	0	0	0	0	0	0	0	2	6.97823e-05	0	0	0	2	7.26787e-05	0	0	0	0	0	0	0
ENOG410ZKAN pfkB family carbohydrate kinase	ENOG410ZKAN	546	0.00297582	0	0	0	546	0.00207658	0	0	0	0	0	0	0	0	0	0	0	0	0	0	78	0.00272151	0	0	0	78	0.00283447	9	0.00028798	0	0	0	9	0.00013528
ENOG410ZKS5 Bacterial regulatory proteins, tetR family	ENOG410ZKS5	0	0	0	0	0	0	0	0	0	0	0	0	0	0	2	6.37587e-05	0	0	0	2	3.94687e-05	2	6.97823e-05	0	0	0	2	7.26787e-05	2	6.39955e-05	0	0	0	2	3.00622e-05
ENOG410ZMKP Transcriptional regulator, TetR family	ENOG410ZMKP	325	0.00177132	0	0	0	325	0.00123606	0	0	0	0	0	0	0	0	0	0	0	0	0	0	21	0.000732714	0	0	0	21	0.000763127	3	9.59932e-05	0	0	0	3	4.50934e-05
ENOG410ZMQY Transcriptional modulator of MazE toxin, MazF	ENOG410ZMQY	0	0	0	0	0	0	0	0	0	0	0	0	0	0	0	0	1	51	0.00264184	51	0.00100645	0	0	0	0	0	0	0	0	0	0	0	0	0	0
ENOG410ZMX3 NB-ARC domain	ENOG410ZMX3	1	5.45023e-06	0	0	0	1	3.80325e-06	1	3.08765e-05	0	0	0	1	1.38688e-05	1	3.18793e-05	0	0	0	1	1.97344e-05	0	0	0	0	0	0	0	0	0	0	0	0	0	0
ENOG410ZPKE AraC family transcriptional regulator	ENOG410ZPKE	0	0	0	0	0	0	0	0	0	0	0	0	0	0	2	6.37587e-05	0	0	0	2	3.94687e-05	0	0	0	0	0	0	0	0	0	0	0	0	0	0
ENOG410ZRIC Transcriptional regulator AbrB family	ENOG410ZRIC	249	0.00135711	0	0	0	249	0.000947009	0	0	0	0	0	0	0	0	0	0	0	0	0	0	34	0.0011863	0	0	0	34	0.00123554	2	6.39955e-05	0	0	0	2	3.00622e-05
ENOG410ZS2R crp fnr family transcriptional regulator	ENOG410ZS2R	0	0	0	0	0	0	0	2	6.1753e-05	0	0	0	2	2.77376e-05	2	6.37587e-05	0	0	0	2	3.94687e-05	0	0	0	0	0	0	0	0	0	0	0	0	0	0
ENOG410ZSCS XRE family Transcriptional regulator	ENOG410ZSCS	2	1.09005e-05	0	0	0	2	7.6065e-06	0	0	0	0	0	0	0	5	0.000159397	0	0	0	5	9.86718e-05	0	0	0	0	0	0	0	0	0	0	0	0	0	0
ENOG410ZSF4 LysR family (Transcriptional regulator	ENOG410ZSF4	7	3.81516e-05	0	0	0	7	2.66228e-05	0	0	0	0	0	0	0	2	6.37587e-05	0	0	0	2	3.94687e-05	0	0	0	0	0	0	0	6	0.000191986	0	0	0	6	9.01867e-05
ENOG410ZWA0 Transcriptional regulator, TetR family	ENOG410ZWA0	0	0	0	0	0	0	0	0	0	1	46	0.00115819	46	0.000637965	0	0	0	0	0	0	0	0	0	0	0	0	0	0	0	0	0	0	0	0	0
ENOG410ZWAE Bacterial regulatory proteins, tetR family	ENOG410ZWAE	1	5.45023e-06	0	0	0	1	3.80325e-06	0	0	0	0	0	0	0	0	0	0	0	0	0	0	0	0	0	0	0	0	0	0	0	0	0	0	0	0
ENOG410ZWJ7 Uncharacterized conserved protein (DUF2358)	ENOG410ZWJ7	0	0	0	0	0	0	0	0	0	0	0	0	0	0	0	0	0	0	0	0	0	1	3.48912e-05	0	0	0	1	3.63394e-05	0	0	0	0	0	0	0
ENOG410ZWTA transcriptional regulator protein-like protein	ENOG410ZWTA	12	6.54027e-05	0	0	0	12	4.5639e-05	10	0.000308765	0	0	0	10	0.000138688	6	0.000191276	0	0	0	6	0.000118406	2	6.97823e-05	0	0	0	2	7.26787e-05	2	6.39955e-05	0	0	0	2	3.00622e-05
ENOG410ZWY6 TetR family transcriptional Regulator	ENOG410ZWY6	0	0	1	147	0.00185012	147	0.000559078	0	0	0	0	0	0	0	0	0	0	0	0	0	0	3	0.000104673	0	0	0	3	0.000109018	0	0	0	0	0	0	0
ENOG410ZWZR Transcriptional regulator, MarR family	ENOG410ZWZR	320	0.00174407	0	0	0	320	0.00121704	0	0	0	0	0	0	0	0	0	0	0	0	0	0	33	0.00115141	1	30	0.00109018	63	0.00228938	3	9.59932e-05	0	0	0	3	4.50934e-05
ENOG410ZXCJ transcriptional regulator (Xre family)	ENOG410ZXCJ	2	1.09005e-05	0	0	0	2	7.6065e-06	4	0.000123506	0	0	0	4	5.54752e-05	2	6.37587e-05	0	0	0	2	3.94687e-05	0	0	0	0	0	0	0	2	6.39955e-05	0	0	0	2	3.00622e-05
ENOG410ZXDD HTH_MARR	ENOG410ZXDD	2	1.09005e-05	0	0	0	2	7.6065e-06	0	0	0	0	0	0	0	0	0	0	0	0	0	0	0	0	0	0	0	0	0	1	3.19977e-05	0	0	0	1	1.50311e-05
ENOG410ZXM2 XRE family	ENOG410ZXM2	6	3.27014e-05	0	0	0	6	2.28195e-05	6	0.000185259	0	0	0	6	8.32128e-05	6	0.000191276	0	0	0	6	0.000118406	0	0	0	0	0	0	0	1	3.19977e-05	0	0	0	1	1.50311e-05
ENOG410ZXN1 helix-turn-helix domain-containing protein	ENOG410ZXN1	8	4.36018e-05	0	0	0	8	3.0426e-05	0	0	0	0	0	0	0	0	0	0	0	0	0	0	11	0.000383803	0	0	0	11	0.000399733	0	0	0	0	0	0	0
ENOG410ZXQQ Transcriptional regulator, TetR family	ENOG410ZXQQ	8	4.36018e-05	0	0	0	8	3.0426e-05	4	0.000123506	0	0	0	4	5.54752e-05	10	0.000318793	0	0	0	10	0.000197344	0	0	0	0	0	0	0	2	6.39955e-05	0	0	0	2	3.00622e-05
ENOG410ZXVX Transcriptional regulator, TetR family	ENOG410ZXVX	8	4.36018e-05	0	0	0	8	3.0426e-05	6	0.000185259	0	0	0	6	8.32128e-05	4	0.000127517	0	0	0	4	7.89375e-05	0	0	0	0	0	0	0	1	3.19977e-05	0	0	0	1	1.50311e-05
ENOG410ZYCJ HTH_XRE	ENOG410ZYCJ	478	0.00260521	0	0	0	478	0.00181795	0	0	0	0	0	0	0	0	0	0	0	0	0	0	56	0.00195391	0	0	0	56	0.002035	3	9.59932e-05	0	0	0	3	4.50934e-05
ENOG411032B transcriptional regulator, tetr family	ENOG411032B	2	1.09005e-05	0	0	0	2	7.6065e-06	0	0	0	0	0	0	0	0	0	0	0	0	0	0	0	0	0	0	0	0	0	0	0	0	0	0	0	0
ENOG4110BBF transcriptional regulator, lysr family	ENOG4110BBF	2	1.09005e-05	0	0	0	2	7.6065e-06	0	0	0	0	0	0	0	0	0	0	0	0	0	0	0	0	0	0	0	0	0	0	0	0	0	0	0	0
ENOG4110Z7N Transcriptional regulator	ENOG4110Z7N	8	4.36018e-05	0	0	0	8	3.0426e-05	0	0	0	0	0	0	0	0	0	0	0	0	0	0	0	0	0	0	0	0	0	0	0	0	0	0	0	0
ENOG4111FSN Transcriptional regulator	ENOG4111FSN	4	2.18009e-05	0	0	0	4	1.5213e-05	0	0	0	0	0	0	0	4	0.000127517	0	0	0	4	7.89375e-05	0	0	0	0	0	0	0	2	6.39955e-05	0	0	0	2	3.00622e-05
ENOG4111GQH AraC family transcriptional regulator	ENOG4111GQH	0	0	0	0	0	0	0	0	0	0	0	0	0	0	0	0	0	0	0	0	0	1	3.48912e-05	0	0	0	1	3.63394e-05	0	0	0	0	0	0	0
ENOG4111H96 Ci repressor	ENOG4111H96	1	5.45023e-06	0	0	0	1	3.80325e-06	0	0	0	0	0	0	0	0	0	0	0	0	0	0	9	0.00031402	0	0	0	9	0.000327054	0	0	0	0	0	0	0
ENOG4111HYR LysR family transcriptional Regulator	ENOG4111HYR	4	2.18009e-05	0	0	0	4	1.5213e-05	0	0	0	0	0	0	0	10	0.000318793	0	0	0	10	0.000197344	0	0	0	0	0	0	0	7	0.000223984	0	0	0	7	0.000105218
ENOG4111I90 GntR Family Transcriptional Regulator	ENOG4111I90	4	2.18009e-05	0	0	0	4	1.5213e-05	0	0	0	0	0	0	0	0	0	0	0	0	0	0	0	0	0	0	0	0	0	1	3.19977e-05	0	0	0	1	1.50311e-05
ENOG4111IAH Transcriptional regulator, ARAC family	ENOG4111IAH	0	0	0	0	0	0	0	0	0	0	0	0	0	0	0	0	0	0	0	0	0	0	0	0	0	0	0	0	0	0	1	56	0.00158746	56	0.000841743
ENOG4111IDF transcriptional regulator AsnC family	ENOG4111IDF	0	0	0	0	0	0	0	0	0	0	0	0	0	0	2	6.37587e-05	0	0	0	2	3.94687e-05	0	0	0	0	0	0	0	0	0	0	0	0	0	0
ENOG4111IF4 asnc family transcriptional regulator	ENOG4111IF4	0	0	0	0	0	0	0	0	0	0	0	0	0	0	0	0	0	0	0	0	0	2	6.97823e-05	0	0	0	2	7.26787e-05	0	0	0	0	0	0	0
ENOG4111IIA transcriptional regulator), MarR family	ENOG4111IIA	0	0	0	0	0	0	0	0	0	0	0	0	0	0	0	0	0	0	0	0	0	1	3.48912e-05	0	0	0	1	3.63394e-05	0	0	0	0	0	0	0
ENOG4111IYW Transcriptional regulator, TetR family	ENOG4111IYW	2	1.09005e-05	0	0	0	2	7.6065e-06	0	0	0	0	0	0	0	1	3.18793e-05	0	0	0	1	1.97344e-05	3	0.000104673	0	0	0	3	0.000109018	0	0	0	0	0	0	0
ENOG4111J47 Transcriptional regulator, MarR Family	ENOG4111J47	486	0.00264881	0	0	0	486	0.00184838	0	0	0	0	0	0	0	0	0	0	0	0	0	0	56	0.00195391	0	0	0	56	0.002035	0	0	0	0	0	0	0
ENOG4111J59 Transcriptional regulator	ENOG4111J59	4	2.18009e-05	0	0	0	4	1.5213e-05	11	0.000339641	0	0	0	11	0.000152557	0	0	0	0	0	0	0	8	0.000279129	0	0	0	8	0.000290715	207	0.00662353	0	0	0	207	0.00311144
ENOG4111JF9 AraC family transcriptional regulator	ENOG4111JF9	6	3.27014e-05	0	0	0	6	2.28195e-05	0	0	0	0	0	0	0	2	6.37587e-05	0	0	0	2	3.94687e-05	3	0.000104673	0	0	0	3	0.000109018	0	0	0	0	0	0	0
ENOG4111JRF Functions in complex with FlhC as a master transcriptional regulator that regulates transcription of several flagellar and non-flagellar operons by binding to their promoter region. Activates expression of class 2 flagellar genes, including fliA, which is a flagellum-specific sigma factor that turns on the class 3 genes. Also regulates genes whose products function in a variety of phy…	ENOG4111JRF	2	1.09005e-05	0	0	0	2	7.6065e-06	0	0	0	0	0	0	0	2	6.37587e-05	0	0	0	2	3.94687e-05	0	0	0	0	0	0	0	4	0.000127991	0	0	0	4	6.01245e-05
ENOG4111K4T XRE family Transcriptional regulator	ENOG4111K4T	0	0	0	0	0	0	0	2	6.1753e-05	0	0	0	2	2.77376e-05	3	9.5638e-05	0	0	0	3	5.92031e-05	0	0	0	0	0	0	0	2	6.39955e-05	0	0	0	2	3.00622e-05
ENOG4111KCX TetR family transcriptional Regulator	ENOG4111KCX	4	2.18009e-05	0	0	0	4	1.5213e-05	0	0	0	0	0	0	0	0	0	0	0	0	0	0	0	0	0	0	0	0	0	2	6.39955e-05	0	0	0	2	3.00622e-05
ENOG4111M1F rna polymerase	ENOG4111M1F	0	0	0	0	0	0	0	0	0	0	0	0	0	0	0	0	0	0	0	0	0	1	3.48912e-05	0	0	0	1	3.63394e-05	0	0	0	0	0	0	0
ENOG4111M3N Transcriptional regulator, TetR family	ENOG4111M3N	3	1.63507e-05	0	0	0	3	1.14098e-05	0	0	0	0	0	0	0	0	0	0	0	0	0	0	0	0	0	0	0	0	0	2	6.39955e-05	0	0	0	2	3.00622e-05
ENOG4111MAS RNA polymerase sigma	ENOG4111MAS	541	0.00294857	0	0	0	541	0.00205756	0	0	0	0	0	0	0	0	0	0	0	0	0	0	53	0.00184923	0	0	0	53	0.00192599	6	0.000191986	0	0	0	6	9.01867e-05
ENOG4111MCK Transcriptional regulator, TetR family	ENOG4111MCK	0	0	0	0	0	0	0	0	0	0	0	0	0	0	0	0	0	0	0	0	0	2	6.97823e-05	0	0	0	2	7.26787e-05	0	0	0	0	0	0	0
ENOG4111N5G RNA polymerase sigma factor	ENOG4111N5G	0	0	0	0	0	0	0	0	0	0	0	0	0	0	0	0	0	0	0	0	0	0	0	0	0	0	0	0	0	0	1	65	0.00184259	65	0.000977023
ENOG4111N9R Transcriptional regulator, MarR Family	ENOG4111N9R	2	1.09005e-05	0	0	0	2	7.6065e-06	0	0	0	0	0	0	0	0	0	0	0	0	0	0	2	6.97823e-05	0	0	0	2	7.26787e-05	0	0	0	0	0	0	0
ENOG4111NFB Transcriptional regulator, TetR family	ENOG4111NFB	0	0	0	0	0	0	0	0	0	0	0	0	0	0	0	0	0	0	0	0	0	3	0.000104673	0	0	0	3	0.000109018	1	3.19977e-05	0	0	0	1	1.50311e-05
ENOG4111NNQ Component of the KaiABC clock protein complex, which constitutes the main circadian regulator in cyanobacteria. The KaiABC complex may act as a promoter-non-specific transcription regulator that represses transcription, possibly by acting on the state of chromosome compaction. In the complex, it decreases the phosphorylation status of KaiC. It has no effect on KaiC by itself, but inst…	ENOG4111NNQ	28	0.000152606	0	0	0	28	0.000106491	2	6.1753e-05	0	0	0	2	2.77376e-05	4	0.000127517	0	0	0	4	7.89375e-05	0	0	0	0	0	0	0	0	0	0	0	0	0	0
ENOG4111NT4 Transcriptional regulator	ENOG4111NT4	0	0	0	0	0	0	0	0	0	0	0	0	0	0	0	0	0	0	0	0	0	0	0	0	0	0	0	0	1	3.19977e-05	0	0	0	1	1.50311e-05
ENOG4111P1W RNA polymerase sigma factor	ENOG4111P1W	0	0	0	0	0	0	0	0	0	0	0	0	0	0	0	0	0	0	0	0	0	1	3.48912e-05	0	0	0	1	3.63394e-05	0	0	0	0	0	0	0
ENOG4111Q7Q RNA polymerase sigma	ENOG4111Q7Q	10	5.45023e-05	0	0	0	10	3.80325e-05	4	0.000123506	0	0	0	4	5.54752e-05	4	0.000127517	0	0	0	4	7.89375e-05	1	3.48912e-05	0	0	0	1	3.63394e-05	1	3.19977e-05	0	0	0	1	1.50311e-05
ENOG4111QDM LysR family (Transcriptional regulator	ENOG4111QDM	2	1.09005e-05	0	0	0	2	7.6065e-06	0	0	1	59	0.0014855	59	0.000818259	2	6.37587e-05	0	0	0	2	3.94687e-05	4	0.000139565	0	0	0	4	0.000145357	2	6.39955e-05	0	0	0	2	3.00622e-05
ENOG4111QYF iron dependent repressor	ENOG4111QYF	0	0	1	69	0.000868423	69	0.000262424	0	0	0	0	0	0	0	0	0	0	0	0	0	0	0	0	0	0	0	0	0	0	0	0	0	0	0	0
ENOG4111RTS transcriptional	ENOG4111RTS	7	3.81516e-05	0	0	0	7	2.66228e-05	3	9.26294e-05	0	0	0	3	4.16064e-05	0	0	0	0	0	0	0	3	0.000104673	0	0	0	3	0.000109018	4	0.000127991	0	0	0	4	6.01245e-05
ENOG4111S8X Transcriptional regulator	ENOG4111S8X	361	0.00196753	1	728	0.0091625	1089	0.00414174	8	0.000247012	0	0	0	8	0.00011095	2	6.37587e-05	0	0	0	2	3.94687e-05	28	0.000976953	0	0	0	28	0.0010175	9	0.00028798	0	0	0	9	0.00013528
ENOG4111SRI CopG family transcriptional regulator	ENOG4111SRI	3661	0.0199533	0	0	0	3661	0.0139237	683	0.0210886	0	0	0	683	0.00947239	625	0.0199246	0	0	0	625	0.012334	347	0.0121072	0	0	0	347	0.0126098	256	0.00819142	0	0	0	256	0.00384797
ENOG4111TR8 transcriptional regulator, merr family	ENOG4111TR8	31	0.000168957	0	0	0	31	0.000117901	0	0	0	0	0	0	0	0	0	0	0	0	0	0	5	0.000174456	0	0	0	5	0.000181697	2	6.39955e-05	0	0	0	2	3.00622e-05
ENOG4111TV5 Transcriptional regulator	ENOG4111TV5	0	0	0	0	0	0	0	0	0	0	0	0	0	0	3	9.5638e-05	0	0	0	3	5.92031e-05	0	0	0	0	0	0	0	1	3.19977e-05	0	0	0	1	1.50311e-05
ENOG4111TV7 Transcriptional regulator CarD family	ENOG4111TV7	398	0.00216919	0	0	0	398	0.00151369	0	0	0	0	0	0	0	0	0	0	0	0	0	0	42	0.00146543	0	0	0	42	0.00152625	1	3.19977e-05	0	0	0	1	1.50311e-05
ENOG4111TXI Tetr family transcriptional regulator	ENOG4111TXI	2	1.09005e-05	0	0	0	2	7.6065e-06	9	0.000277888	0	0	0	9	0.000124819	10	0.000318793	0	0	0	10	0.000197344	4	0.000139565	0	0	0	4	0.000145357	3	9.59932e-05	0	0	0	3	4.50934e-05
ENOG4111UFR AntiSigma factor	ENOG4111UFR	322	0.00175497	1	5756	0.0724441	6078	0.0231162	2	6.1753e-05	0	0	0	2	2.77376e-05	0	0	0	0	0	0	0	62	0.00216325	0	0	0	62	0.00225304	8	0.000255982	0	0	0	8	0.000120249
ENOG4111UFY arsR family transcriptional regulator	ENOG4111UFY	2	1.09005e-05	0	0	0	2	7.6065e-06	13	0.000401394	0	0	0	13	0.000180294	2	6.37587e-05	0	0	0	2	3.94687e-05	0	0	0	0	0	0	0	132	0.0042237	0	0	0	132	0.00198411
ENOG4111UT8 Transcriptional regulator, MarR Family	ENOG4111UT8	2	1.09005e-05	0	0	0	2	7.6065e-06	0	0	0	0	0	0	0	0	0	0	0	0	0	0	0	0	0	0	0	0	0	0	0	0	0	0	0	0
ENOG4111UXI Transcriptional regulator	ENOG4111UXI	0	0	0	0	0	0	0	0	0	0	0	0	0	0	0	0	0	0	0	0	0	0	0	0	0	0	0	0	0	0	0	0	0	0	0
ENOG4111VCW transcriptional regulator, ArsR family	ENOG4111VCW	195	0.00106279	0	0	0	195	0.000741634	33	0.00101892	0	0	0	33	0.00045767	42	0.00133893	0	0	0	42	0.000828843	109	0.00380314	0	0	0	109	0.00396099	220	0.0070395	0	0	0	220	0.00330685
ENOG4111VFW Phage transcriptional regulator AlpA	ENOG4111VFW	3	1.63507e-05	0	0	0	3	1.14098e-05	0	0	0	0	0	0	0	0	0	0	0	0	0	0	0	0	0	0	0	0	0	0	0	0	0	0	0	0
ENOG4111VHI Sporulation transcriptional regulator spoiiid	ENOG4111VHI	228	0.00124265	0	0	0	228	0.000867141	0	0	0	0	0	0	0	0	0	0	0	0	0	0	4	0.000139565	0	0	0	4	0.000145357	4	0.000127991	0	0	0	4	6.01245e-05
ENOG4111WAF Transcriptional regulator	ENOG4111WAF	0	0	0	0	0	0	0	0	0	0	0	0	0	0	2	6.37587e-05	0	0	0	2	3.94687e-05	0	0	0	0	0	0	0	0	0	0	0	0	0	0
ENOG4111WWJ Transcriptional regulator, TetR family	ENOG4111WWJ	377	0.00205474	0	0	0	377	0.00143383	0	0	0	0	0	0	0	0	0	0	0	0	0	0	33	0.00115141	0	0	0	33	0.0011992	9	0.00028798	0	0	0	9	0.00013528
ENOG4111YHX AraC family transcriptional regulator	ENOG4111YHX	0	0	0	0	0	0	0	2	6.1753e-05	0	0	0	2	2.77376e-05	0	0	0	0	0	0	0	4	0.000139565	0	0	0	4	0.000145357	3	9.59932e-05	0	0	0	3	4.50934e-05
ENOG4111YS4 XRE family Transcriptional regulator	ENOG4111YS4	54	0.000294312	0	0	0	54	0.000205376	6	0.000185259	1	24	0.000604272	30	0.000416064	1	3.18793e-05	1	49	0.00253823	50	0.000986718	0	0	0	0	0	0	0	8	0.000255982	0	0	0	8	0.000120249
ENOG4111ZCY Transcriptional regulator	ENOG4111ZCY	0	0	1	144	0.00181236	144	0.000547668	0	0	0	0	0	0	0	0	0	0	0	0	0	0	0	0	0	0	0	0	0	0	0	0	0	0	0	0
ENOG4111ZMY GntR domain protein	ENOG4111ZMY	8	4.36018e-05	0	0	0	8	3.0426e-05	2	6.1753e-05	0	0	0	2	2.77376e-05	3	9.5638e-05	0	0	0	3	5.92031e-05	0	0	0	0	0	0	0	7	0.000223984	0	0	0	7	0.000105218
ENOG41120GD Transcriptional regulator	ENOG41120GD	1	5.45023e-06	0	0	0	1	3.80325e-06	0	0	0	0	0	0	0	0	0	0	0	0	0	0	0	0	0	0	0	0	0	0	0	0	0	0	0	0
ENOG41120I0 Transcriptional regulator AbrB family	ENOG41120I0	0	0	0	0	0	0	0	0	0	1	284	0.00715055	284	0.00393874	0	0	1	285	0.0147632	285	0.00562429	0	0	0	0	0	0	0	0	0	0	0	0	0	0
ENOG41120IJ asnc family transcriptional regulator	ENOG41120IJ	0	0	0	0	0	0	0	1	3.08765e-05	0	0	0	1	1.38688e-05	0	0	0	0	0	0	0	0	0	0	0	0	0	0	2	6.39955e-05	0	0	0	2	3.00622e-05
ENOG41121M1 transcriptional modulator of maze toxin, mazf	ENOG41121M1	0	0	0	0	0	0	0	1	3.08765e-05	0	0	0	1	1.38688e-05	0	0	0	0	0	0	0	0	0	0	0	0	0	0	1	3.19977e-05	0	0	0	1	1.50311e-05
ENOG411226U Transcriptional regulator, arsr family	ENOG411226U	2	1.09005e-05	0	0	0	2	7.6065e-06	0	0	0	0	0	0	0	1	3.18793e-05	0	0	0	1	1.97344e-05	2	6.97823e-05	0	0	0	2	7.26787e-05	1	3.19977e-05	0	0	0	1	1.50311e-05
ENOG41122JK antitermination factor	ENOG41122JK	0	0	0	0	0	0	0	0	0	0	0	0	0	0	0	0	0	0	0	0	0	0	0	0	0	0	0	0	0	0	1	61	0.0017292	61	0.000916898
ENOG41122KT Transcriptional regulator (XRE family	ENOG41122KT	2	1.09005e-05	0	0	0	2	7.6065e-06	0	0	0	0	0	0	0	0	0	0	0	0	0	0	0	0	0	0	0	0	0	0	0	0	0	0	0	0
ENOG411234W Tryptophan RNA-binding attenuator protein	ENOG411234W	229	0.0012481	0	0	0	229	0.000870944	0	0	0	0	0	0	0	0	0	0	0	0	0	0	26	0.00090717	0	0	0	26	0.000944823	4	0.000127991	0	0	0	4	6.01245e-05
ENOG411240P XRE family	ENOG411240P	0	0	0	0	0	0	0	0	0	0	0	0	0	0	1	3.18793e-05	0	0	0	1	1.97344e-05	0	0	0	0	0	0	0	0	0	0	0	0	0	0
ENOG41124I6 TetR family transcriptional Regulator	ENOG41124I6	3	1.63507e-05	0	0	0	3	1.14098e-05	0	0	0	0	0	0	0	0	0	0	0	0	0	0	4	0.000139565	0	0	0	4	0.000145357	1	3.19977e-05	0	0	0	1	1.50311e-05
ENOG41124MU Transcriptional activator ligand binding domain protein	ENOG41124MU	501	0.00273056	0	0	0	501	0.00190543	0	0	0	0	0	0	0	2	6.37587e-05	0	0	0	2	3.94687e-05	54	0.00188412	0	0	0	54	0.00196233	76	0.00243183	0	0	0	76	0.00114237
ENOG4112548	ENOG4112548	5	2.72511e-05	0	0	0	5	1.90163e-05	1	3.08765e-05	0	0	0	1	1.38688e-05	2	6.37587e-05	0	0	0	2	3.94687e-05	0	0	0	0	0	0	0	0	0	0	0	0	0	0
ENOG41125CY Transcriptional regulator	ENOG41125CY	1	5.45023e-06	0	0	0	1	3.80325e-06	0	0	0	0	0	0	0	0	0	0	0	0	0	0	1	3.48912e-05	0	0	0	1	3.63394e-05	2	6.39955e-05	0	0	0	2	3.00622e-05
ENOG41125FB Transcriptional regulator AbrB family	ENOG41125FB	260	0.00141706	0	0	0	260	0.000988845	0	0	0	0	0	0	0	0	0	0	0	0	0	0	43	0.00150032	0	0	0	43	0.00156259	0	0	0	0	0	0	0
ENOG41126FM RNA polymerase sigma-24 subunit ECF subfamily	ENOG41126FM	68	0.000370615	0	0	0	68	0.000258621	0	0	0	0	0	0	0	0	0	0	0	0	0	0	6	0.000209347	0	0	0	6	0.000218036	4	0.000127991	0	0	0	4	6.01245e-05
ENOG4112812 TOBE domain	ENOG4112812	1	5.45023e-06	0	0	0	1	3.80325e-06	0	0	0	0	0	0	0	0	0	0	0	0	0	0	3	0.000104673	0	0	0	3	0.000109018	3	9.59932e-05	0	0	0	3	4.50934e-05
ENOG41129J4 Transcriptional regulator (XRE family)	ENOG41129J4	3	1.63507e-05	0	0	0	3	1.14098e-05	0	0	0	0	0	0	0	0	0	0	0	0	0	0	1	3.48912e-05	0	0	0	1	3.63394e-05	0	0	0	0	0	0	0
ENOG4112AKW regulatory protein, arsR	ENOG4112AKW	106	0.000577724	0	0	0	106	0.000403145	24	0.000741036	0	0	0	24	0.000332851	23	0.000733225	0	0	0	23	0.00045389	21	0.000732714	0	0	0	21	0.000763127	10	0.000319977	0	0	0	10	0.000150311
ENOG4112B9J RNA polymerase (delta subunit)	ENOG4112B9J	237	0.0012917	0	0	0	237	0.00090137	0	0	0	0	0	0	0	0	0	0	0	0	0	0	36	0.00125608	0	0	0	36	0.00130822	5	0.000159989	0	0	0	5	7.51556e-05
ENOG4112BE8 Domain of unknown function (DUF955)	ENOG4112BE8	11	5.99525e-05	0	0	0	11	4.18358e-05	0	0	0	0	0	0	0	0	0	0	0	0	0	0	1	3.48912e-05	0	0	0	1	3.63394e-05	0	0	0	0	0	0	0
ENOG4112CCY MarR family Transcriptional regulator	ENOG4112CCY	7	3.81516e-05	0	0	0	7	2.66228e-05	0	0	0	0	0	0	0	1	3.18793e-05	0	0	0	1	1.97344e-05	0	0	0	0	0	0	0	4	0.000127991	0	0	0	4	6.01245e-05
ENOG4112CPF HTH_MARR	ENOG4112CPF	0	0	0	0	0	0	0	0	0	0	0	0	0	0	0	0	0	0	0	0	0	3	0.000104673	0	0	0	3	0.000109018	0	0	0	0	0	0	0
ENOG4112CXU abrb family transcriptional regulator	ENOG4112CXU	169	0.000921088	0	0	0	169	0.000642749	1	3.08765e-05	0	0	0	1	1.38688e-05	0	0	0	0	0	0	0	20	0.000697823	0	0	0	20	0.000726787	44	0.0014079	0	0	0	44	0.000661369
COG0084 tatd family	COG0084	5127	0.0279433	2	232	0.00291992	5359	0.0203816	1015	0.0313396	1	80	0.00201424	1095	0.0151863	834	0.0265874	1	152	0.00787371	986	0.0194581	613	0.0213883	1	67	0.00243474	680	0.0247108	593	0.0189747	1	209	0.00592464	802	0.012055
COG0116 Specifically methylates the guanine in position 2445 (m2G2445) and the guanine in position 2069 (m7G2069) of 23S rRNA (By similarity)	COG0116	804	0.00438198	1	301	0.00378834	1105	0.00420259	4	0.000123506	0	0	0	4	5.54752e-05	16	0.00051007	0	0	0	16	0.00031575	83	0.00289597	0	0	0	83	0.00301617	71	0.00227184	0	0	0	71	0.00106721
COG0122 Glycosylase	COG0122	3929	0.0214139	1	701	0.00882268	4630	0.0176091	750	0.0231574	0	0	0	750	0.0104016	793	0.0252803	0	0	0	793	0.0156494	768	0.0267964	1	369	0.0134092	1137	0.0413179	891	0.02851	1	38	0.00107721	929	0.0139639
COG0164 Endonuclease that specifically degrades the RNA of RNA- DNA hybrids (By similarity)	COG0164	5414	0.0295075	0	0	0	5414	0.0205908	957	0.0295488	2	154	0.00387741	1111	0.0154082	876	0.0279263	2	157	0.00813271	1033	0.0203856	780	0.0272151	2	142	0.00516019	922	0.0335049	794	0.0254062	0	0	0	794	0.0119347
COG0177 endonuclease III	COG0177	5369	0.0292623	1	137	0.00172426	5506	0.0209407	874	0.026986	1	87	0.00219049	961	0.0133279	878	0.0279901	1	151	0.00782191	1029	0.0203067	773	0.0269709	1	23	0.000835805	796	0.0289261	1079	0.0345255	0	0	0	1079	0.0162186
COG0178 The UvrABC repair system catalyzes the recognition and processing of DNA lesions. UvrA is an ATPase and a DNA-binding protein. A damage recognition complex composed of 2 UvrA and 2 UvrB subunits scans DNA for abnormalities. When the presence of a lesion has been verified by UvrB, the UvrA molecules dissociate (By similarity)	COG0178	19090	0.104045	10	9897	0.124562	28987	0.110245	3431	0.105937	7	11177	0.281415	14608	0.202595	3547	0.113076	4	5328	0.275994	8875	0.175142	3478	0.121351	6	3418	0.124208	6896	0.250596	3945	0.126231	8	2752	0.0780125	6697	0.100663
COG0187 DNA gyrase negatively supercoils closed circular double- stranded DNA in an ATP-dependent manner and also catalyzes the interconversion of other topological isomers of double-stranded DNA rings, including catenanes and knotted rings (By similarity)	COG0187	16910	0.0921633	6	6016	0.0757165	22926	0.0871933	3053	0.0942659	2	3528	0.088828	6581	0.0912705	2992	0.095383	5	865	0.0448076	3857	0.0761154	2998	0.104604	6	4140	0.150445	7138	0.25939	3005	0.0961532	9	3282	0.0930367	6287	0.0945007
COG0188 DNA gyrase negatively supercoils closed circular double- stranded DNA in an ATP-dependent manner and also catalyzes the interconversion of other topological isomers of double-stranded DNA rings, including catenanes and knotted rings (By similarity)	COG0188	20464	0.111533	6	2582	0.0324967	23046	0.0876497	3624	0.111896	4	1900	0.0478382	5524	0.0766112	3638	0.115977	6	1780	0.0922052	5418	0.106921	3639	0.126969	7	1746	0.0634485	5385	0.195687	2468	0.0789704	10	3194	0.0905421	5662	0.0851062
COG0210 helicase	COG0210	2184	0.0119033	9	2616	0.0329246	4800	0.0182556	197	0.00608267	2	1736	0.043709	1933	0.0268084	236	0.00752353	2	75	0.00388505	311	0.00613739	383	0.0133633	4	662	0.0240567	1045	0.0379746	872	0.027902	3	313	0.00887278	1185	0.0178119
COG0249 that it carries out the mismatch recognition step. This protein has a weak ATPase activity (By similarity)	COG0249	21336	0.116286	7	6175	0.0777176	27511	0.104631	3387	0.104579	2	1090	0.027444	4477	0.0620906	3558	0.113427	3	3398	0.176019	6956	0.137272	3470	0.121072	5	6164	0.223996	9634	0.350093	3596	0.115064	6	2189	0.0620528	5785	0.086955
COG0258 Structure-specific nuclease with 5'-flap endonuclease and 5'-3' exonuclease activities involved in DNA replication and repair. During DNA replication, cleaves the 5'-overhanging flap structure that is generated by displacement synthesis when DNA polymerase encounters the 5'-end of a downstream Okazaki fragment. It enters the flap from the 5'-end and then tracks to cleave the flap base, le…	COG0258	6717	0.0366092	1	817	0.0102826	7534	0.0286537	1509	0.0465926	0	0	0	1509	0.020928	1363	0.0434516	0	0	0	1363	0.0268979	1220	0.0425672	0	0	0	1220	0.044334	1404	0.0449248	1	281	0.00796566	1685	0.0253274
COG0266 Involved in base excision repair of DNA damaged by oxidation or by mutagenic agents. Acts as DNA glycosylase that recognizes and removes damaged bases. Has a preference for oxidized purines, such as 7,8-dihydro-8-oxoguanine (8-oxoG). Has AP (apurinic apyrimidinic) lyase activity and introduces nicks in the DNA strand. Cleaves the DNA backbone by beta-delta elimination to generate a single…	COG0266	955	0.00520497	1	155	0.00195081	1110	0.00422161	104	0.00321115	0	0	0	104	0.00144235	85	0.00270974	0	0	0	85	0.00167742	139	0.00484987	0	0	0	139	0.00505117	55	0.00175987	1	47	0.00133233	102	0.00153317
COG0270 Cytosine-specific methyltransferase	COG0270	5	2.72511e-05	1	93	0.00117048	98	0.000372719	6	0.000185259	0	0	0	6	8.32128e-05	15	0.00047819	1	102	0.00528367	117	0.00230892	4	0.000139565	2	278	0.0101023	282	0.0102477	27	0.000863939	0	0	0	27	0.00040584
COG0272 DNA ligase (NAD+) activity	COG0272	1173	0.00639312	4	3550	0.0446798	4723	0.0179628	28	0.000864541	3	484	0.0121862	512	0.00710082	42	0.00133893	4	2390	0.123804	2432	0.047994	225	0.00785051	4	2091	0.0759856	2316	0.084162	50	0.00159989	6	1796	0.0509122	1846	0.0277474
COG0305 Replicative dna helicase	COG0305	1045	0.00569549	6	1651	0.0207792	2696	0.0102536	40	0.00123506	2	464	0.0116826	504	0.00698987	53	0.00168961	2	899	0.0465688	952	0.0187871	179	0.00624552	3	841	0.0305614	1020	0.0370661	58	0.00185587	2	373	0.0105736	431	0.00647841
COG0322 The UvrABC repair system catalyzes the recognition and processing of DNA lesions. UvrC both incises the 5' and 3' sides of the lesion. The N-terminal half is responsible for the 3' incision and the C-terminal half is responsible for the 5' incision (By similarity)	COG0322	10250	0.0558648	4	1475	0.0185641	11725	0.0445931	1909	0.0589432	3	1769	0.0445399	3678	0.0510094	1942	0.0619097	2	587	0.030407	2529	0.0499082	1884	0.065735	2	491	0.0178426	2375	0.086306	1925	0.0615956	4	629	0.0178306	2554	0.0383895
COG0323 This protein is involved in the repair of mismatches in DNA. It is required for dam-dependent methyl-directed DNA mismatch repair. May act as a molecular matchmaker , a protein that promotes the formation of a stable complex between two or more DNA-binding proteins in an ATP-dependent manner without itself being part of a final effector complex (By similarity)	COG0323	11851	0.0645906	2	251	0.00315905	12102	0.0460269	2114	0.0652729	1	133	0.00334868	2247	0.0311632	1921	0.0612402	1	148	0.0076665	2069	0.0408304	1647	0.0574657	2	557	0.020241	2204	0.080092	1859	0.0594838	1	56	0.00158746	1915	0.0287846
COG0328 ribonuclease H activity	COG0328	3039	0.0165632	0	0	0	3039	0.0115581	539	0.0166424	0	0	0	539	0.00747528	498	0.0158759	1	197	0.0102047	695	0.0137154	465	0.0162244	1	62	0.00225304	527	0.0191508	415	0.0132791	1	146	0.00413874	561	0.00843246
COG0338 site-specific DNA-methyltransferase (adenine-specific) activity	COG0338	1427	0.00777747	1	207	0.00260527	1634	0.00621451	199	0.00614442	2	725	0.0182541	924	0.0128148	176	0.00561077	1	172	0.00890972	348	0.00686756	418	0.0145845	0	0	0	418	0.0151899	452	0.014463	0	0	0	452	0.00679407
COG0350 Involved in the cellular defense against the biological effects of O6-methylguanine (O6-MeG) in DNA. Repairs alkylated guanine in DNA by stoichiometrically transferring the alkyl group at the O-6 position to a cysteine residue in the enzyme. This is a suicide reaction the enzyme is irreversibly inactivated (By similarity)	COG0350	2906	0.0158384	2	111	0.00139703	3017	0.0114744	482	0.0148825	0	0	0	482	0.00668476	499	0.0159078	2	210	0.0108781	709	0.0139917	527	0.0183876	0	0	0	527	0.0191508	407	0.0130231	1	63	0.0017859	470	0.00706463
COG0353 May play a role in DNA repair. It seems to be involved in an RecBC-independent recombinational process of DNA repair. It may act with RecF and RecO (By similarity)	COG0353	466	0.00253981	1	91	0.00114531	557	0.00211841	6	0.000185259	1	48	0.00120854	54	0.000748915	11	0.000350673	1	57	0.00295264	68	0.00134194	96	0.00334955	0	0	0	96	0.00348858	20	0.000639955	3	141	0.003997	161	0.00242001
COG0358 DNA primase activity	COG0358	11579	0.0631082	4	1982	0.0249451	13561	0.0515759	1559	0.0481364	2	326	0.00820803	1885	0.0261427	1593	0.0507838	2	476	0.0246571	2069	0.0408304	1312	0.0457772	2	832	0.0302343	2144	0.0779116	1441	0.0461087	5	1377	0.0390346	2818	0.0423577
COG0389 Poorly processive error-prone DNA polymerase involved in untargeted mutagenesis. Copies undamaged DNA at stalled replication forks which arise in vivo from mismatched or misaligned primer ends. These misaligned primers can be extended by polIV. Exhibits no 3-5 exonuclease (proofreading) activity. May be involved in translesional synthesis in conjunction with the beta clamp from polIII (By…	COG0389	6775	0.0369253	1	114	0.00143479	6889	0.0262006	926	0.0285916	0	0	0	926	0.0128425	956	0.0304767	0	0	0	956	0.0188661	935	0.0326232	0	0	0	935	0.0339773	1291	0.0413091	2	770	0.0218276	2061	0.0309791
COG0415 deoxyribo-dipyrimidine photolyase	COG0415	9378	0.0511122	0	0	0	9378	0.0356669	1785	0.0551145	1	125	0.00314725	1910	0.0264894	1676	0.0534298	0	0	0	1676	0.0330748	849	0.0296226	1	200	0.00726787	1049	0.03812	1034	0.0330856	0	0	0	1034	0.0155422
COG0417 DNA polymerase	COG0417	30587	0.166706	2	31844	0.400784	62431	0.237441	5477	0.16911	0	0	0	5477	0.0759594	5471	0.174412	0	0	0	5471	0.107967	4023	0.140367	1	443	0.0160983	4466	0.162292	4266	0.136502	2	114	0.00323162	4380	0.0658363
COG0419 Involved in DNA double-strand break repair (DSBR). The Rad50 Mre11 complex possesses single-strand endonuclease activity and ATP-dependent double-strand-specific 3'-5' exonuclease activity. Rad50 provides an ATP-dependent control of Mre11 by unwinding and or repositioning DNA ends into the Mre11 active site (By similarity)	COG0419	6146	0.0334971	0	0	0	6146	0.0233748	917	0.0283137	1	564	0.0142004	1481	0.0205397	862	0.02748	0	0	0	862	0.017011	1463	0.0510458	1	27	0.000981163	1490	0.0541456	2109	0.0674832	4	4078	0.115601	6187	0.0929975
COG0420 Exonuclease	COG0420	2665	0.0145249	0	0	0	2665	0.0101357	433	0.0133695	0	0	0	433	0.00600519	429	0.0136762	0	0	0	429	0.00846604	1049	0.0366008	0	0	0	1049	0.03812	1281	0.0409891	1	48	0.00136068	1329	0.0199764
COG0468 Can catalyze the hydrolysis of ATP in the presence of single-stranded DNA, the ATP-dependent uptake of single-stranded DNA by duplex DNA, and the ATP-dependent hybridization of homologous single-stranded DNAs. It interacts with LexA causing its activation and leading to its autocatalytic cleavage (By similarity)	COG0468	11103	0.0605139	5	382	0.00480779	11485	0.0436803	2063	0.0636982	2	953	0.0239946	3016	0.0418283	2024	0.0645238	2	334	0.0173014	2358	0.0465336	2198	0.0766908	1	79	0.00287081	2277	0.0827447	2296	0.0734668	6	1137	0.0322312	3433	0.0516018
COG0470 DNA polymerase III subunit delta'	COG0470	19888	0.108394	3	958	0.0120572	20846	0.0792826	3894	0.120233	0	0	0	3894	0.0540051	3680	0.117316	0	0	0	3680	0.0726225	3659	0.127667	0	0	0	3659	0.132966	3785	0.121111	3	635	0.0180007	4420	0.0664376
COG0494 Nudix hydrolase	COG0494	1681	0.00916183	2	1428	0.0179726	3109	0.0118243	243	0.00750298	1	38	0.000956764	281	0.00389713	307	0.00978696	1	61	0.00315984	368	0.00726225	582	0.0203067	0	0	0	582	0.0211495	840	0.0268781	1	65	0.00184259	905	0.0136032
COG0497 May be involved in recombinational repair of damaged DNA (By similarity)	COG0497	1129	0.00615331	1	707	0.00889819	1836	0.00698277	9	0.000277888	2	1523	0.0383461	1532	0.021247	17	0.000541949	1	145	0.0075111	162	0.00319697	179	0.00624552	1	130	0.00472412	309	0.0112289	42	0.0013439	5	1042	0.0295381	1084	0.0162937
COG0507 exodeoxyribonuclease v alpha	COG0507	1542	0.00840425	2	1631	0.0205275	3173	0.0120677	19	0.000586653	2	1467	0.0369361	1486	0.020609	19	0.000605708	2	130	0.00673409	149	0.00294042	166	0.00579193	1	37	0.00134456	203	0.00737689	54	0.00172788	4	757	0.0214591	811	0.0121902
COG0513 purine NTP-dependent helicase activity	COG0513	11125	0.0606338	5	2186	0.0275127	13311	0.0506251	1780	0.0549601	1	34	0.000856052	1814	0.025158	1795	0.0572234	0	0	0	1795	0.0354232	1867	0.0651418	1	44	0.00159893	1911	0.0694445	2487	0.0795783	2	107	0.00303319	2594	0.0389907
COG0514 atp-dependent dna helicase	COG0514	2815	0.0153424	3	2287	0.0287838	5102	0.0194042	708	0.0218605	0	0	0	708	0.00981911	786	0.0250572	1	32	0.00165762	818	0.0161427	1922	0.0670608	2	7531	0.273672	9453	0.343516	1610	0.0515163	3	132	0.00374188	1742	0.0261842
COG0550 Releases the supercoiling and torsional tension of DNA, which is introduced during the DNA replication and transcription, by transiently cleaving and rejoining one strand of the DNA duplex. Introduces a single-strand break via transesterification at a target site in duplex DNA. The scissile phosphodiester is attacked by the catalytic tyrosine of the enzyme, resulting in the formation of a…	COG0550	1416	0.00771752	4	5802	0.0730231	7218	0.0274519	11	0.000339641	1	1474	0.0371124	1485	0.0205952	23	0.000733225	1	2150	0.111371	2173	0.0428828	195	0.00680378	2	323	0.0117376	518	0.0188238	75	0.00239983	2	1794	0.0508555	1869	0.0280932
COG0551 DNA topoisomerase type I activity	COG0551	17154	0.0934932	5	1485	0.01869	18639	0.0708888	2883	0.0890169	2	119	0.00299618	3002	0.0416341	2957	0.0942672	1	1184	0.061332	4141	0.08172	3280	0.114443	4	543	0.0197323	3823	0.138925	4201	0.134422	2	304	0.00861765	4505	0.0677152
COG0553 helicase	COG0553	41113	0.224075	8	161385	2.03117	202498	0.770151	6841	0.211226	5	36336	0.914868	43177	0.598813	6618	0.210978	3	27649	1.43224	34267	0.676237	4266	0.148846	13	15787	0.57369	20053	0.728713	4038	0.129207	11	13616	0.38598	17654	0.265359
COG0556 damaged site, the DNA wraps around one UvrB monomer. DNA wrap is dependent on ATP binding by UvrB and probably causes local melting of the DNA helix, facilitating insertion of UvrB beta-hairpin between the DNA strands. Then UvrB probes one DNA strand for the presence of a lesion. If a lesion is found the UvrA subunits dissociate and the UvrB-DNA preincision complex is formed. This complex…	COG0556	15685	0.0854868	4	2518	0.0316912	18203	0.0692306	2870	0.0886155	2	2075	0.0522444	4945	0.0685812	2687	0.0856598	1	95	0.00492107	2782	0.054901	2814	0.0981837	3	819	0.0297619	3633	0.132021	2890	0.0924734	3	1475	0.0418126	4365	0.0656108
COG0582 Integrase	COG0582	2028	0.0110531	7	8254	0.103884	10282	0.039105	11	0.000339641	0	0	0	11	0.000152557	40	0.00127517	2	106	0.00549087	146	0.00288122	92	0.00320999	7	1240	0.0450608	1332	0.048404	213	0.00681552	4	2332	0.0661065	2545	0.0382542
COG0587 DNA polymerase III (alpha subunit)	COG0587	2376	0.0129497	9	20160	0.253731	22536	0.0857101	107	0.00330378	6	5676	0.14291	5783	0.0802032	114	0.00363425	5	4648	0.24077	4762	0.093975	432	0.015073	10	3126	0.113597	3558	0.129295	157	0.00502364	9	6899	0.19557	7056	0.10606
COG0592 DNA polymerase processivity factor activity	COG0592	6870	0.0374431	1	449	0.00565105	7319	0.027836	1072	0.0330996	0	0	0	1072	0.0148673	1042	0.0332183	0	0	0	1042	0.0205632	1104	0.0385198	0	0	0	1104	0.0401187	1166	0.0373093	2	628	0.0178023	1794	0.0269658
COG0593 it binds specifically double-stranded DNA at a 9 bp consensus (dnaA box) 5'-TTATC CA A CA A-3'. DnaA binds to ATP and to acidic phospholipids (By similarity)	COG0593	931	0.00507416	1	88	0.00110755	1019	0.00387551	54	0.00166733	1	59	0.0014855	113	0.00156717	66	0.00210404	1	191	0.00989393	257	0.00507173	188	0.00655954	2	575	0.0208951	763	0.0277269	120	0.00383973	1	50	0.00141738	170	0.00255529
COG0608 Single-stranded-DNA-specific exonuclease (RecJ)	COG0608	20385	0.111103	2	1066	0.0134165	21451	0.0815835	3448	0.106462	2	150	0.0037767	3598	0.0498999	3497	0.111482	1	155	0.00802911	3652	0.0720699	3199	0.111617	0	0	0	3199	0.11625	3631	0.116184	6	429	0.0121611	4060	0.0610263
COG0629 single-stranded DNA-binding protein	COG0629	297	0.00161872	1	63	0.000792908	360	0.00136917	2	6.1753e-05	0	0	0	2	2.77376e-05	13	0.000414432	0	0	0	13	0.000256547	39	0.00136076	0	0	0	39	0.00141724	24	0.000767945	0	0	0	24	0.000360747
COG0632 The RuvA-RuvB complex in the presence of ATP renatures cruciform structure in supercoiled DNA with palindromic sequence, indicating that it may promote strand exchange reactions in homologous recombination. RuvAB is a helicase that mediates the Holliday junction migration by localized denaturation and reannealing. RuvA stimulates, in the presence of DNA, the weak ATPase activity of RuvB (…	COG0632	864	0.004709	0	0	0	864	0.00328601	101	0.00311852	1	62	0.00156104	163	0.00226061	134	0.00427183	0	0	0	134	0.0026444	287	0.0100138	0	0	0	287	0.0104294	188	0.00601557	0	0	0	188	0.00282585
COG0648 Endonuclease IV plays a role in DNA repair. It cleaves phosphodiester bonds at apurinic or apyrimidinic sites (AP sites) to produce new 5'-ends that are base-free deoxyribose 5-phosphate residues. It preferentially attacks modified AP sites created by bleomycin and neocarzinostatin (By similarity)	COG0648	6238	0.0339985	0	0	0	6238	0.0237247	1191	0.0367739	1	519	0.0130674	1710	0.0237156	1193	0.0380321	2	831	0.0430464	2024	0.0399424	1046	0.0364962	0	0	0	1046	0.038011	1170	0.0374373	2	359	0.0101768	1529	0.0229826
COG0675 Transposase	COG0675	349780	1.90638	5	64833	0.815978	414613	1.57688	66980	2.06811	4	1363	0.0343176	68343	0.947835	60423	1.92625	3	708	0.0366749	61131	1.20638	35467	1.23748	2	13197	0.479571	48664	1.76842	32917	1.05327	4	9670	0.274121	42587	0.64013
COG0692 Excises uracil residues from the DNA which can arise as a result of misincorporation of dUMP residues by DNA polymerase or due to deamination of cytosine (By similarity)	COG0692	14	7.63032e-05	0	0	0	14	5.32455e-05	0	0	0	0	0	0	0	4	0.000127517	0	0	0	4	7.89375e-05	2	6.97823e-05	1	47	0.00170795	49	0.00178063	10	0.000319977	0	0	0	10	0.000150311
COG0708 Exodeoxyribonuclease III	COG0708	5369	0.0292623	0	0	0	5369	0.0204197	994	0.0306912	0	0	0	994	0.0137856	989	0.0315287	0	0	0	989	0.0195173	610	0.0212836	0	0	0	610	0.022167	570	0.0182387	1	378	0.0107154	948	0.0142495
COG0742 Methyltransferase	COG0742	163	0.000888387	0	0	0	163	0.00061993	1	3.08765e-05	1	241	0.0060679	242	0.00335625	8	0.000255035	2	79	0.00409225	87	0.00171689	36	0.00125608	0	0	0	36	0.00130822	7	0.000223984	0	0	0	7	0.000105218
COG0749 DNA polymerase	COG0749	15622	0.0851434	6	4525	0.056951	20147	0.0766241	2307	0.071232	3	5273	0.132764	7580	0.105125	2207	0.0703577	2	1826	0.0945881	4033	0.0795887	1660	0.0579193	4	2026	0.0736235	3686	0.133947	840	0.0268781	6	5224	0.148088	6064	0.0911487
COG0758 DNA protecting protein DprA	COG0758	686	0.00373886	0	0	0	686	0.00260903	6	0.000185259	0	0	0	6	8.32128e-05	11	0.000350673	0	0	0	11	0.000217078	148	0.00516389	1	17	0.000617769	165	0.00599599	20	0.000639955	1	73	0.00206937	93	0.00139789
COG0776 This protein is one of the two subunits of integration host factor, a specific DNA-binding protein that functions in genetic recombination as well as in transcriptional and translational control (By similarity)	COG0776	365	0.00198933	1	76	0.000956524	441	0.00167723	9	0.000277888	0	0	0	9	0.000124819	21	0.000669466	1	69	0.00357425	90	0.00177609	77	0.00268662	0	0	0	77	0.00279813	43	0.0013759	0	0	0	43	0.000646338
COG0792 UPF0102 protein	COG0792	168	0.000915638	0	0	0	168	0.000638946	9	0.000277888	0	0	0	9	0.000124819	1	3.18793e-05	0	0	0	1	1.97344e-05	22	0.000767606	0	0	0	22	0.000799466	8	0.000255982	0	0	0	8	0.000120249
COG0816 Could be a nuclease that resolves Holliday junction intermediates in genetic recombination (By similarity)	COG0816	302	0.00164597	0	0	0	302	0.00114858	3	9.26294e-05	0	0	0	3	4.16064e-05	10	0.000318793	0	0	0	10	0.000197344	68	0.0023726	0	0	0	68	0.00247108	10	0.000319977	0	0	0	10	0.000150311
COG0817 Nuclease that resolves Holliday junction intermediates in genetic recombination. Cleaves the cruciform structure in supercoiled DNA by nicking to strands with the same polarity at sites symmetrically opposed at the junction in the homologous arms and leaves a 5'-terminal phosphate and a 3'-terminal hydroxyl group (By similarity)	COG0817	431	0.00234905	0	0	0	431	0.0016392	33	0.00101892	0	0	0	33	0.00045767	36	0.00114766	0	0	0	36	0.000710437	113	0.0039427	0	0	0	113	0.00410635	41	0.00131191	0	0	0	41	0.000616276
COG0827 DNA Methylase	COG0827	0	0	0	0	0	0	0	0	0	0	0	0	0	0	0	0	0	0	0	0	0	64	0.00223303	0	0	0	64	0.00232572	4	0.000127991	2	490	0.0138903	494	0.00742537
COG0847 DNA polymerase iii	COG0847	24	0.000130805	0	0	0	24	9.1278e-05	0	0	0	0	0	0	0	12	0.000382552	0	0	0	12	0.000236812	0	0	0	0	0	0	0	17	0.000543961	0	0	0	17	0.000255529
COG0863 DNA methylase n-4 n-6 domain protein	COG0863	10974	0.0598108	3	2809	0.0353536	13783	0.0524202	2015	0.0622161	5	1866	0.0469822	3881	0.0538248	1973	0.062898	3	979	0.0507129	2952	0.0582558	2278	0.0794821	5	2661	0.096699	4939	0.17948	1541	0.0493085	4	1369	0.0388078	2910	0.0437406
COG1039 Endonuclease that specifically degrades the RNA of RNA- DNA hybrids (By similarity)	COG1039	0	0	0	0	0	0	0	0	0	0	0	0	0	0	0	0	0	0	0	0	0	16	0.000558259	0	0	0	16	0.00058143	2	6.39955e-05	0	0	0	2	3.00622e-05
COG1041 RNA methylase	COG1041	8215	0.0447736	0	0	0	8215	0.0312437	1663	0.0513476	0	0	0	1663	0.0230638	1419	0.0452368	0	0	0	1419	0.0280031	1185	0.041346	0	0	0	1185	0.0430621	1269	0.0406051	0	0	0	1269	0.0190745
COG1059 Responsible for removing an oxidatively damaged form of guanine (7,8-dihydro-8-oxoguanine 7-oxoG) from DNA. Also nicks DNA at apurinic apyrimidinic sites (AP sites) (By similarity)	COG1059	4309	0.023485	0	0	0	4309	0.0163882	782	0.0241454	1	446	0.0112294	1228	0.0170309	765	0.0243877	1	86	0.00445486	851	0.0167939	412	0.0143752	0	0	0	412	0.0149718	299	0.00956732	0	0	0	299	0.00449431
COG1061 type iii restriction protein res subunit	COG1061	1646	0.00897107	0	0	0	1646	0.00626015	63	0.00194522	0	0	0	63	0.000873734	1	3.18793e-05	1	164	0.00849531	165	0.00325617	184	0.00641997	1	515	0.0187148	699	0.0254012	1299	0.041565	3	3363	0.0953328	4662	0.0700751
COG1074 The heterodimer acts as both an ATP-dependent DNA helicase and an ATP-dependent, dual-direction single-stranded exonuclease. Recognizes the chi site generating a DNA molecule suitable for the initiation of homologous recombination. The AddA nuclease domain is required for chi fragment generation	COG1074	3515	0.0191575	11	87607	1.10261	91122	0.34656	321	0.00991135	3	16606	0.418106	16927	0.234757	465	0.0148239	2	16065	0.832178	16530	0.326209	1045	0.0364613	5	9901	0.359796	10946	0.397771	713	0.0228144	8	5393	0.152878	6106	0.09178
COG1107 phosphoesterase RecJ domain protein	COG1107	12703	0.0692342	0	0	0	12703	0.0483127	2564	0.0791673	0	0	0	2564	0.0355596	2443	0.0778812	0	0	0	2443	0.0482111	2216	0.0773188	0	0	0	2216	0.080528	2586	0.0827461	0	0	0	2586	0.0388705
COG1112 Helicase	COG1112	2313	0.0126064	4	1094	0.0137689	3407	0.0129577	581	0.0179392	2	2015	0.0507337	2596	0.0360034	740	0.0235907	1	2401	0.124373	3141	0.0619856	1377	0.0480451	3	936	0.0340136	2313	0.0840529	3058	0.097849	4	531	0.0150525	3589	0.0539467
COG1193 muts2 protein	COG1193	12218	0.0665909	1	110	0.00138444	12328	0.0468865	1923	0.0593755	0	0	0	1923	0.0266697	1878	0.0598694	2	1957	0.101374	3835	0.0756813	1387	0.048394	2	89	0.0032342	1476	0.0536369	1499	0.0479646	1	67	0.00189929	1566	0.0235387
COG1194 a g-specific adenine glycosylase	COG1194	695	0.00378791	0	0	0	695	0.00264326	155	0.00478585	1	44	0.00110783	199	0.00275989	196	0.00624835	1	202	0.0104637	398	0.00785428	368	0.0128399	0	0	0	368	0.0133729	338	0.0108152	2	198	0.00561281	536	0.00805668
COG1195 it is required for DNA replication and normal SOS inducibility. RecF binds preferentially to single-stranded, linear DNA. It also seems to bind ATP (By similarity)	COG1195	645	0.0035154	2	142	0.00178719	787	0.00299316	4	0.000123506	0	0	0	4	5.54752e-05	14	0.000446311	0	0	0	14	0.000276281	75	0.00261684	0	0	0	75	0.00272545	18	0.000575959	0	0	0	18	0.00027056
COG1197 transcriptioN-repair coupling factor	COG1197	2210	0.012045	10	9763	0.122876	11973	0.0455363	38	0.00117331	3	5440	0.136968	5478	0.0759733	92	0.0029329	5	1405	0.07278	1497	0.0295423	408	0.0142356	6	4594	0.166943	5002	0.181769	147	0.00470367	6	8148	0.230976	8295	0.124683
COG1198 Primosomal protein n'	COG1198	1460	0.00795733	3	858	0.0107987	2318	0.00881594	11	0.000339641	1	50	0.0012589	61	0.000845997	28	0.000892622	3	3766	0.195081	3794	0.0748722	282	0.00983931	2	438	0.0159166	720	0.0261643	73	0.00233583	5	1553	0.0440237	1626	0.0244406
COG1199 helicase	COG1199	15488	0.0844131	2	1263	0.0158959	16751	0.0637083	2659	0.0821006	0	0	0	2659	0.0368771	2921	0.0931196	2	161	0.00833991	3082	0.0608213	2455	0.0856578	1	86	0.00312519	2541	0.0923383	3432	0.109816	2	273	0.00773888	3705	0.0556903
COG1200 ATP-dependent DNA helicase recG	COG1200	92	0.000501421	5	968	0.0121831	1060	0.00403145	18	0.000555777	1	1924	0.0484425	1942	0.0269332	42	0.00133893	0	0	0	42	0.000828843	52	0.00181434	1	770	0.0279813	822	0.029871	34	0.00108792	2	506	0.0143439	540	0.00811681
COG1201 purine NTP-dependent helicase activity	COG1201	23053	0.125644	0	0	0	23053	0.0876763	4789	0.147867	0	0	0	4789	0.0664177	4507	0.14368	0	0	0	4507	0.0889428	4689	0.163605	1	472	0.0171522	5161	0.187547	4527	0.144854	2	178	0.00504586	4705	0.0707214
COG1202 Dead deah box helicase domain protein	COG1202	15681	0.085465	0	0	0	15681	0.0596388	2912	0.0899123	0	0	0	2912	0.0403859	2885	0.0919719	0	0	0	2885	0.0569336	2734	0.0953924	0	0	0	2734	0.0993518	3162	0.101177	0	0	0	3162	0.0475284
COG1203 CRISPR-associated helicase, cas3	COG1203	17226	0.0938856	5	2179	0.0274246	19405	0.0738021	2991	0.0923516	0	0	0	2991	0.0414816	2955	0.0942035	0	0	0	2955	0.058315	1376	0.0480102	3	3428	0.124571	4804	0.174574	1023	0.0327337	1	92	0.00260797	1115	0.0167597
COG1204 helicase	COG1204	38896	0.211992	1	1656	0.0208422	40552	0.154229	7446	0.229906	0	0	0	7446	0.103267	6757	0.215409	0	0	0	6757	0.133345	4974	0.173549	2	209	0.00759493	5183	0.188347	4223	0.135126	0	0	0	4223	0.0634764
COG1205 DEAD DEAH box helicase	COG1205	2689	0.0146557	5	29453	0.370691	32142	0.122244	67	0.00206872	2	5961	0.150086	6028	0.0836011	35	0.00111578	2	6953	0.36017	6988	0.137904	197	0.00687356	3	19141	0.695572	19338	0.702731	1112	0.0355815	9	21113	0.598502	22225	0.334067
COG1241 dna replication licensing factor	COG1241	14957	0.081519	1	46	0.000578949	15003	0.0570602	3008	0.0928765	0	0	0	3008	0.0417173	2898	0.0923864	0	0	0	2898	0.0571902	3401	0.118665	0	0	0	3401	0.12359	3491	0.111704	2	362	0.0102618	3853	0.0579149
COG1273 Could be involved in DNA repair (By similarity)	COG1273	6042	0.0329303	1	94	0.00118307	6136	0.0233367	1060	0.0327291	0	0	0	1060	0.0147009	1001	0.0319112	1	39	0.00202023	1040	0.0205237	656	0.0228886	0	0	0	656	0.0238386	366	0.0117112	0	0	0	366	0.00550139
COG1311 DNA-directed DNA polymerase activity	COG1311	12132	0.0661221	1	88	0.00110755	12220	0.0464757	2428	0.0749681	0	0	0	2428	0.0336734	2215	0.0706128	0	0	0	2215	0.0437116	2029	0.0707942	0	0	0	2029	0.0737326	2354	0.0753226	2	174	0.00493247	2528	0.0379987
COG1315 PALM domain HD hydrolase domain and	COG1315	2007	0.0109386	0	0	0	2007	0.00763312	0	0	0	0	0	0	0	3	9.5638e-05	0	0	0	3	5.92031e-05	228	0.00795519	0	0	0	228	0.00828537	25	0.000799943	1	31	0.000878774	56	0.000841743
COG1330 exodeoxyribonuclease V, gamma	COG1330	24	0.000130805	0	0	0	24	9.1278e-05	0	0	0	0	0	0	0	4	0.000127517	0	0	0	4	7.89375e-05	0	0	0	0	0	0	0	18	0.000575959	0	0	0	18	0.00027056
COG1332 CRISPR-associated RAMP protein, Csm5 family	COG1332	662	0.00360805	0	0	0	662	0.00251775	0	0	0	0	0	0	0	0	0	0	0	0	0	0	43	0.00150032	0	0	0	43	0.00156259	8	0.000255982	1	53	0.00150242	61	0.000916898
COG1336 Crispr-associated ramp protein, Cmr4 family	COG1336	8	4.36018e-05	0	0	0	8	3.0426e-05	0	0	0	0	0	0	0	1	3.18793e-05	0	0	0	1	1.97344e-05	77	0.00268662	0	0	0	77	0.00279813	70	0.00223984	0	0	0	70	0.00105218
COG1337 Crispr-associated ramp protein	COG1337	312	0.00170047	0	0	0	312	0.00118661	0	0	0	0	0	0	0	2	6.37587e-05	0	0	0	2	3.94687e-05	34	0.0011863	0	0	0	34	0.00123554	20	0.000639955	1	68	0.00192763	88	0.00132274
COG1343 CRISPR (clustered regularly interspaced short palindromic repeat), is an adaptive immune system that provides protection against mobile genetic elements (viruses, transposable elements and conjugative plasmids). CRISPR clusters contain sequences complementary to antecedent mobile elements and target invading nucleic acids. CRISPR clusters are transcribed and processed into CRISPR RNA (crR…	COG1343	2364	0.0128843	0	0	0	2364	0.00899089	465	0.0143576	0	0	0	465	0.00644899	365	0.011636	0	0	0	365	0.00720304	229	0.00799008	0	0	0	229	0.00832171	245	0.00783944	0	0	0	245	0.00368262
COG1353 crispr-associated protein	COG1353	1672	0.00911278	3	3158	0.0397461	4830	0.0183697	9	0.000277888	2	282	0.0071002	291	0.00403582	5	0.000159397	1	152	0.00787371	157	0.0030983	156	0.00544302	1	246	0.00893948	402	0.0146084	121	0.00387172	3	1728	0.0489846	1849	0.0277925
COG1367 Crispr-associated ramp protein, Cmr1 family	COG1367	0	0	1	128	0.00161099	128	0.000486816	2	6.1753e-05	0	0	0	2	2.77376e-05	0	0	0	0	0	0	0	0	0	0	0	0	0	0	28	0.000895936	2	292	0.00827748	320	0.00480996
COG1372 Provides the precursors necessary for DNA synthesis. Catalyzes the biosynthesis of deoxyribonucleotides from the corresponding ribonucleotides (By similarity)	COG1372	10638	0.0579795	0	0	0	10638	0.040459	2086	0.0644083	0	0	0	2086	0.0289303	1768	0.0563627	0	0	0	1768	0.0348904	983	0.034298	0	0	0	983	0.0357216	638	0.0204145	0	0	0	638	0.00958985
COG1381 Involved in DNA repair and RecF pathway recombination (By similarity)	COG1381	399	0.00217464	0	0	0	399	0.0015175	0	0	0	0	0	0	0	12	0.000382552	1	71	0.00367785	83	0.00163795	41	0.00143054	1	90	0.00327054	131	0.00476046	13	0.00041597	0	0	0	13	0.000195405
COG1389 DNA topoisomerase VI subunit B	COG1389	13364	0.0728368	0	0	0	13364	0.0508266	2411	0.0744432	0	0	0	2411	0.0334377	2273	0.0724618	0	0	0	2273	0.0448562	2118	0.0738995	0	0	0	2118	0.0769668	2239	0.0716429	1	61	0.0017292	2300	0.0345716
COG1423 ATP dependent DNA ligase	COG1423	7677	0.0418414	0	0	0	7677	0.0291976	1496	0.0461912	0	0	0	1496	0.0207477	1307	0.0416663	0	0	0	1307	0.0257928	737	0.0257148	0	0	0	737	0.0267821	920	0.0294379	0	0	0	920	0.0138286
COG1466 DNA polymerase III (delta' subunit)	COG1466	645	0.0035154	0	0	0	645	0.0024531	1	3.08765e-05	0	0	0	1	1.38688e-05	12	0.000382552	1	104	0.00538727	116	0.00228919	84	0.00293086	1	176	0.00639573	260	0.00944823	19	0.000607957	1	117	0.00331666	136	0.00204423
COG1467 DNA primase is the polymerase that synthesizes small RNA primers for the Okazaki fragments on both template strands at replication forks during chromosomal DNA synthesis (By similarity)	COG1467	6324	0.0344672	0	0	0	6324	0.0240518	1161	0.0358476	0	0	0	1161	0.0161017	1191	0.0379683	0	0	0	1191	0.0235036	1036	0.0361472	0	0	0	1036	0.0376476	1221	0.0390692	1	98	0.00277806	1319	0.019826
COG1468 crispr-associated protein cas4	COG1468	7657	0.0417324	0	0	0	7657	0.0291215	1293	0.0399233	0	0	0	1293	0.0179324	1258	0.0401042	0	0	0	1258	0.0248258	728	0.0254008	0	0	0	728	0.0264551	639	0.0204465	0	0	0	639	0.00960489
COG1474 Involved in regulation of DNA replication (By similarity)	COG1474	21896	0.119338	3	2569	0.032333	24465	0.0930465	3970	0.12258	0	0	0	3970	0.0550591	4096	0.130578	0	0	0	4096	0.080832	4199	0.146508	1	1272	0.0462237	5471	0.198813	4144	0.132599	3	1266	0.035888	5410	0.0813184
COG1484 IstB domain protein ATP-binding protein	COG1484	6885	0.0375248	0	0	0	6885	0.0261854	1114	0.0343964	3	1391	0.0350226	2505	0.0347413	846	0.0269699	4	269	0.0139344	1115	0.0220038	1016	0.0354494	1	184	0.00668644	1200	0.0436072	684	0.0218864	2	1223	0.0346691	1907	0.0286643
COG1515 Selectively cleaves double-stranded DNA at the second phosphodiester bond 3' to a deoxyinosine leaving behind the intact lesion on the nicked DNA. Acts in DNA repair (By similarity)	COG1515	388	0.00211469	0	0	0	388	0.00147566	105	0.00324203	0	0	0	105	0.00145622	115	0.00366613	0	0	0	115	0.00226945	204	0.0071178	0	0	0	204	0.00741323	158	0.00505564	0	0	0	158	0.00237492
COG1518 CRISPR (clustered regularly interspaced short palindromic repeat), is an adaptive immune system that provides protection against mobile genetic elements (viruses, transposable elements and conjugative plasmids). CRISPR clusters contain sequences complementary to antecedent mobile elements and target invading nucleic acids. CRISPR clusters are transcribed and processed into CRISPR RNA (crR…	COG1518	15935	0.0868494	12	2353	0.0296145	18288	0.0695539	2953	0.0911782	0	0	0	2953	0.0409546	2824	0.0900273	2	434	0.0224815	3258	0.0642946	2795	0.0975208	3	1113	0.0404457	3908	0.142014	3164	0.101241	5	2316	0.0656529	5480	0.0823705
COG1525 nuclease	COG1525	16589	0.0904138	0	0	0	16589	0.0630921	3034	0.0936792	0	0	0	3034	0.0420779	2837	0.0904417	2	102	0.00528367	2939	0.0579993	1515	0.0528601	1	191	0.00694082	1706	0.061995	962	0.0307818	3	472	0.01338	1434	0.0215546
COG1533 radical SAM domain protein	COG1533	6262	0.0341293	4	1423	0.0179097	7685	0.029228	905	0.0279432	0	0	0	905	0.0125513	854	0.027225	1	66	0.00341885	920	0.0181556	570	0.019888	0	0	0	570	0.0207134	734	0.0234863	1	136	0.00385527	870	0.0130771
COG1555 Competence protein	COG1555	459	0.00250165	0	0	0	459	0.00174569	11	0.000339641	0	0	0	11	0.000152557	8	0.000255035	0	0	0	8	0.000157875	65	0.00226793	0	0	0	65	0.00236206	12	0.000383973	0	0	0	12	0.000180373
COG1567 CRISPR-associated RAMP protein, Csm4 family	COG1567	541	0.00294857	0	0	0	541	0.00205756	0	0	0	0	0	0	0	0	0	0	0	0	0	0	19	0.000662932	1	25	0.000908484	44	0.00159893	2	6.39955e-05	0	0	0	2	3.00622e-05
COG1570 Bidirectionally degrades single-stranded DNA into large acid-insoluble oligonucleotides, which are then degraded further into small acid-soluble oligonucleotides (By similarity)	COG1570	9432	0.0514065	0	0	0	9432	0.0358723	1553	0.0479512	2	102	0.00256816	1655	0.0229529	1560	0.0497318	2	655	0.0339295	2215	0.0437116	1384	0.0482894	1	261	0.00948457	1645	0.0597782	1006	0.0321897	3	307	0.0087027	1313	0.0197359
COG1573 uracil-dna glycosylase	COG1573	4111	0.0224059	1	79	0.000994282	4190	0.0159356	718	0.0221693	0	0	0	718	0.0099578	707	0.0225387	0	0	0	707	0.0139522	543	0.0189459	0	0	0	543	0.0197323	568	0.0181747	0	0	0	568	0.00853768
COG1583 endonuclease activity	COG1583	11	5.99525e-05	0	0	0	11	4.18358e-05	0	0	0	0	0	0	0	0	0	0	0	0	0	0	8	0.000279129	0	0	0	8	0.000290715	9	0.00028798	0	0	0	9	0.00013528
COG1599 DNA replication	COG1599	14927	0.0813555	1	599	0.00753892	15526	0.0590493	2742	0.0846633	1	92	0.00231638	2834	0.0393042	2785	0.088784	0	0	0	2785	0.0549602	2535	0.0884491	1	324	0.011774	2859	0.103894	3499	0.11196	2	364	0.0103185	3863	0.0580652
COG1604 Crispr-associated ramp protein, Cmr6 family	COG1604	0	0	0	0	0	0	0	2	6.1753e-05	0	0	0	2	2.77376e-05	0	0	0	0	0	0	0	24	0.000837388	0	0	0	24	0.000872145	28	0.000895936	0	0	0	28	0.000420871
COG1623 Participates in a DNA-damage check-point. DisA forms globular foci that rapidly scan along the chromosomes searching for lesions (By similarity)	COG1623	703	0.00383151	0	0	0	703	0.00267369	4	0.000123506	0	0	0	4	5.54752e-05	6	0.000191276	0	0	0	6	0.000118406	100	0.00348912	0	0	0	100	0.00363394	16	0.000511964	1	30	0.000850426	46	0.000691432
COG1643 helicase	COG1643	75	0.000408767	2	771	0.00970369	846	0.00321755	2	6.1753e-05	2	161	0.00405366	163	0.00226061	49	0.00156209	1	96	0.00497287	145	0.00286148	4	0.000139565	1	169	0.00614135	173	0.00628671	59	0.00188787	2	217	0.00615142	276	0.00414859
COG1658 ribonuclease M5 activity	COG1658	2502	0.0136365	0	0	0	2502	0.00951573	442	0.0136474	0	0	0	442	0.00613001	397	0.0126561	0	0	0	397	0.00783454	210	0.00732714	0	0	0	210	0.00763127	293	0.00937533	0	0	0	293	0.00440412
COG1662 IS1 Transposase	COG1662	1	5.45023e-06	0	0	0	1	3.80325e-06	19	0.000586653	0	0	0	19	0.000263507	0	0	0	0	0	0	0	0	0	0	0	0	0	0	290	0.00927934	0	0	0	290	0.00435902
COG1688 crispr-associated protein cas5	COG1688	7539	0.0410893	0	0	0	7539	0.0286727	1438	0.0444004	0	0	0	1438	0.0199433	1356	0.0432284	0	0	0	1356	0.0267598	568	0.0198182	0	0	0	568	0.0206408	424	0.013567	0	0	0	424	0.0063732
COG1697 DNA topoisomerase VI, subunit A	COG1697	8364	0.0455857	0	0	0	8364	0.0318104	1573	0.0485687	0	0	0	1573	0.0218156	1488	0.0474365	0	0	0	1488	0.0293647	1381	0.0481847	0	0	0	1381	0.0501847	1318	0.042173	0	0	0	1318	0.019811
COG1722 Bidirectionally degrades single-stranded DNA into large acid-insoluble oligonucleotides, which are then degraded further into small acid-soluble oligonucleotides (By similarity)	COG1722	1505	0.00820259	0	0	0	1505	0.00572389	276	0.00852191	0	0	0	276	0.00382779	259	0.00825675	0	0	0	259	0.0051112	273	0.00952529	0	0	0	273	0.00992065	177	0.0056636	0	0	0	177	0.00266051
COG1743 DNA methylase	COG1743	2941	0.0160291	4	11188	0.14081	14129	0.0537361	109	0.00336554	2	7162	0.180325	7271	0.10084	140	0.00446311	4	4477	0.231912	4617	0.0911136	214	0.00746671	4	25910	0.941553	26124	0.949329	88	0.0028158	4	33352	0.945447	33440	0.502641
COG1754 Releases the supercoiling and torsional tension of DNA, which is introduced during the DNA replication and transcription, by transiently cleaving and rejoining one strand of the DNA duplex. Introduces a single-strand break via transesterification at a target site in duplex DNA. The scissile phosphodiester is attacked by the catalytic tyrosine of the enzyme, resulting in the formation of a…	COG1754	12	6.54027e-05	0	0	0	12	4.5639e-05	0	0	0	0	0	0	0	3	9.5638e-05	0	0	0	3	5.92031e-05	14	0.000488476	0	0	0	14	0.000508751	9	0.00028798	1	74	0.00209772	83	0.00124758
COG1769 CRISPR-associated protein Cmr3	COG1769	0	0	0	0	0	0	0	0	0	0	0	0	0	0	1	3.18793e-05	0	0	0	1	1.97344e-05	9	0.00031402	0	0	0	9	0.000327054	3	9.59932e-05	0	0	0	3	4.50934e-05
COG1793 DNA ligase	COG1793	27950	0.152334	0	0	0	27950	0.106301	5232	0.161546	0	0	0	5232	0.0725615	4977	0.158664	0	0	0	4977	0.0982179	3899	0.136041	0	0	0	3899	0.141687	4279	0.136918	1	91	0.00257963	4370	0.065686
COG1796 DNA polymerase	COG1796	13753	0.074957	5	6727	0.084665	20480	0.0778906	2489	0.0768516	1	188	0.00473347	2677	0.0371268	2409	0.0767973	0	0	0	2409	0.0475401	2210	0.0771095	4	3589	0.130422	5799	0.210732	2252	0.0720589	0	0	0	2252	0.0338501
COG1857 CRISPR-associated autoregulator DevR family	COG1857	3004	0.0163725	0	0	0	3004	0.011425	669	0.0206564	0	0	0	669	0.00927822	597	0.019032	0	0	0	597	0.0117814	280	0.00976953	0	0	0	280	0.010175	210	0.00671952	0	0	0	210	0.00315654
COG1933 Possesses two activities a DNA synthesis (polymerase) and an exonucleolytic activity that degrades single stranded DNA in the 3'- to 5'-direction. Has a template-primer preference which is characteristic of a replicative DNA polymerase (By similarity)	COG1933	23163	0.126244	0	0	0	23163	0.0880947	4180	0.129064	0	0	0	4180	0.0579716	4174	0.133064	0	0	0	4174	0.0823712	3848	0.134261	0	0	0	3848	0.139834	4237	0.135574	1	119	0.00337336	4356	0.0654756
COG1943 transposase	COG1943	15686	0.0854922	3	15700	0.197598	31386	0.119369	2677	0.0826563	1	1985	0.0499783	4662	0.0646563	2277	0.0725893	1	1833	0.0949507	4110	0.0811082	1688	0.0588963	2	1296	0.0470958	2984	0.108437	8530	0.272941	3	1375	0.0389779	9905	0.148883
COG1948 Excision repair cross-complementing rodent repair deficiency, complementation group 4	COG1948	14592	0.0795297	0	0	0	14592	0.055497	2978	0.0919502	0	0	0	2978	0.0413013	2608	0.0831413	0	0	0	2608	0.0514672	2054	0.0716665	0	0	0	2054	0.074641	2481	0.0793864	1	50	0.00141738	2531	0.0380438
COG1961 Resolvase	COG1961	4102	0.0223568	6	738	0.00928835	4840	0.0184077	224	0.00691633	2	1286	0.0323789	1510	0.0209419	269	0.00857554	2	242	0.0125358	511	0.0100843	790	0.027564	3	306	0.0111198	1096	0.0398279	535	0.0171188	1	119	0.00337336	654	0.00983035
COG2003 DNA repair protein (RadC	COG2003	1638	0.00892747	2	133	0.00167392	1771	0.00673556	162	0.00500199	1	322	0.00810732	484	0.0067125	197	0.00628023	2	306	0.015851	503	0.00992638	433	0.0151079	3	1525	0.0554175	1958	0.0711525	613	0.0196146	3	1224	0.0346974	1837	0.0276122
COG2094 3-methyladenine DNA glycosylase	COG2094	250	0.00136256	0	0	0	250	0.000950813	106	0.00327291	0	0	0	106	0.00147009	93	0.00296478	0	0	0	93	0.0018353	193	0.00673399	0	0	0	193	0.0070135	144	0.00460767	0	0	0	144	0.00216448
COG2169 Transcriptional regulator	COG2169	0	0	0	0	0	0	0	0	0	0	0	0	0	0	0	0	0	0	0	0	0	0	0	0	0	0	0	0	1	3.19977e-05	0	0	0	1	1.50311e-05
COG2176 Required for replicative DNA synthesis. This DNA polymerase also exhibits 3' to 5' exonuclease activity (By similarity)	COG2176	2586	0.0140943	3	2697	0.033944	5283	0.0200926	16	0.000494024	1	9006	0.226753	9022	0.125124	6	0.000191276	1	5846	0.302827	5852	0.115485	314	0.0109558	3	6632	0.241003	6946	0.252413	38	0.00121591	2	3993	0.113192	4031	0.0605904
COG2189 DNA methylase	COG2189	16318	0.0889368	3	275	0.00346111	16593	0.0631073	2878	0.0888625	3	212	0.00533774	3090	0.0428546	2576	0.0821212	1	65	0.00336705	2641	0.0521185	2062	0.0719456	1	305	0.0110835	2367	0.0860153	1471	0.0470687	5	270	0.00765384	1741	0.0261692
COG2219 DNA primase is the polymerase that synthesizes small RNA primers for the Okazaki fragments on both template strands at replication forks during chromosomal DNA synthesis (By similarity)	COG2219	11873	0.0647105	1	463	0.00582725	12336	0.0469169	2256	0.0696573	0	0	0	2256	0.031288	2077	0.0662134	0	0	0	2077	0.0409883	1618	0.0564539	0	0	0	1618	0.0587971	1444	0.0462047	0	0	0	1444	0.0217049
COG2231 Hhh-gpd family	COG2231	784	0.00427298	1	469	0.00590276	1253	0.00476547	121	0.00373605	0	0	0	121	0.00167812	115	0.00366613	0	0	0	115	0.00226945	302	0.0105371	0	0	0	302	0.0109745	458	0.014655	0	0	0	458	0.00688425
COG2255 The RuvA-RuvB complex in the presence of ATP renatures cruciform structure in supercoiled DNA with palindromic sequence, indicating that it may promote strand exchange reactions in homologous recombination. RuvAB is a helicase that mediates the Holliday junction migration by localized denaturation and reannealing (By similarity)	COG2255	1076	0.00586444	3	366	0.00460642	1442	0.00548429	100	0.00308765	2	516	0.0129919	616	0.00854318	164	0.00522821	3	690	0.0357425	854	0.0168531	346	0.0120723	1	466	0.0169341	812	0.0295076	260	0.00831941	5	1191	0.0337619	1451	0.0218102
COG2256 Recombination factor protein RarA	COG2256	1251	0.00681823	6	3172	0.0399223	4423	0.0168218	12	0.000370518	0	0	0	12	0.000166426	31	0.00098826	2	167	0.00865072	198	0.0039074	211	0.00736204	2	272	0.00988431	483	0.0175519	39	0.00124791	6	881	0.0249742	920	0.0138286
COG2356 endonuclease I	COG2356	9	4.9052e-05	1	132	0.00166133	141	0.000536258	0	0	0	0	0	0	0	0	0	0	0	0	0	0	17	0.00059315	0	0	0	17	0.000617769	5	0.000159989	0	0	0	5	7.51556e-05
COG2452 resolvase	COG2452	575	0.00313388	0	0	0	575	0.00218687	138	0.00426095	1	390	0.00981942	528	0.00732272	163	0.00519633	0	0	0	163	0.0032167	318	0.0110954	1	1588	0.0577069	1906	0.0692628	316	0.0101113	0	0	0	316	0.00474983
COG2801 Retrotransposon protein	COG2801	39124	0.213235	1	1498	0.0188536	40622	0.154496	7049	0.217648	5	1323	0.0333105	8372	0.11611	6392	0.203773	1	39	0.00202023	6431	0.126912	3975	0.138692	6	458	0.0166434	4433	0.161092	3075	0.098393	16	8723	0.247276	11798	0.177337
COG2812 dna polymerase iii subunits gamma and tau	COG2812	1048	0.00571184	5	771	0.00970369	1819	0.00691811	18	0.000555777	3	806	0.0202935	824	0.0114279	46	0.00146645	3	346	0.017923	392	0.00773587	174	0.00607106	5	981	0.0356489	1155	0.041972	72	0.00230384	4	585	0.0165833	657	0.00987545
COG2816 NADH pyrophosphatase	COG2816	34	0.000185308	0	0	0	34	0.000129311	32	0.000988047	0	0	0	32	0.000443801	11	0.000350673	0	0	0	11	0.000217078	7	0.000244238	0	0	0	7	0.000254376	303	0.00969531	0	0	0	303	0.00455443
COG2818 DNA-3-methyladenine glycosylase activity	COG2818	14	7.63032e-05	0	0	0	14	5.32455e-05	1	3.08765e-05	0	0	0	1	1.38688e-05	10	0.000318793	0	0	0	10	0.000197344	0	0	1	148	0.00537823	148	0.00537823	2	6.39955e-05	1	48	0.00136068	50	0.000751556
COG2826 transposase	COG2826	4	2.18009e-05	0	0	0	4	1.5213e-05	0	0	0	0	0	0	0	0	0	0	0	0	0	0	0	0	0	0	0	0	0	2	6.39955e-05	0	0	0	2	3.00622e-05
COG2827 Excinuclease abc c subunit domain protein	COG2827	229	0.0012481	0	0	0	229	0.000870944	1	3.08765e-05	0	0	0	1	1.38688e-05	0	0	0	0	0	0	0	35	0.00122119	0	0	0	35	0.00127188	2	6.39955e-05	0	0	0	2	3.00622e-05
COG2887 helicase	COG2887	0	0	0	0	0	0	0	25	0.000771912	0	0	0	25	0.00034672	0	0	0	0	0	0	0	13	0.000453585	0	0	0	13	0.000472412	615	0.0196786	0	0	0	615	0.00924414
COG2925 Exodeoxyribonuclease I	COG2925	13	7.08529e-05	0	0	0	13	4.94423e-05	2	6.1753e-05	0	0	0	2	2.77376e-05	10	0.000318793	0	0	0	10	0.000197344	0	0	0	0	0	0	0	10	0.000319977	0	0	0	10	0.000150311
COG2963 transposase	COG2963	250	0.00136256	0	0	0	250	0.000950813	1	3.08765e-05	1	310	0.00780518	311	0.0043132	0	0	1	190	0.00984213	190	0.00374953	24	0.000837388	0	0	0	24	0.000872145	59	0.00188787	0	0	0	59	0.000886836
COG2965 primosomal replication protein N	COG2965	5	2.72511e-05	0	0	0	5	1.90163e-05	0	0	0	0	0	0	0	3	9.5638e-05	0	0	0	3	5.92031e-05	0	0	0	0	0	0	0	6	0.000191986	0	0	0	6	9.01867e-05
COG2974 May be involved in recombination (By similarity)	COG2974	2	1.09005e-05	0	0	0	2	7.6065e-06	0	0	0	0	0	0	0	2	6.37587e-05	0	0	0	2	3.94687e-05	0	0	0	0	0	0	0	0	0	0	0	0	0	0
COG3039 Transposase	COG3039	58674	0.319787	4	2075	0.0261156	60749	0.231044	10843	0.334794	0	0	0	10843	0.150379	10098	0.321918	2	283	0.0146596	10381	0.204862	5508	0.192181	3	368	0.0133729	5876	0.21353	3842	0.122935	0	0	0	3842	0.0577496
COG3077 negative regulation of DNA-dependent transcription, initiation	COG3077	405	0.00220734	0	0	0	405	0.00154032	0	0	0	0	0	0	0	0	0	0	0	0	0	0	20	0.000697823	0	0	0	20	0.000726787	4	0.000127991	0	0	0	4	6.01245e-05
COG3285 DNA ligase	COG3285	1520	0.00828434	2	179	0.00225287	1699	0.00646172	203	0.00626793	1	381	0.00959282	584	0.00809938	173	0.00551513	0	0	0	173	0.00341404	133	0.00464053	0	0	0	133	0.00483314	75	0.00239983	1	100	0.00283475	175	0.00263045
COG3293 transposase	COG3293	2991	0.0163016	1	189	0.00237872	3180	0.0120943	972	0.0300119	0	0	0	972	0.0134805	927	0.0295522	0	0	0	927	0.0182938	1555	0.0542558	0	0	0	1555	0.0565077	2441	0.0781065	2	3290	0.0932634	5731	0.0861434
COG3316 transposase	COG3316	4	2.18009e-05	2	379	0.00477004	383	0.00145665	0	0	0	0	0	0	0	0	0	0	0	0	0	0	2	6.97823e-05	1	222	0.00806734	224	0.00814002	4	0.000127991	1	71	0.00201268	75	0.00112733
COG3328 transposase	COG3328	37686	0.205397	9	5787	0.0728343	43473	0.165339	7122	0.219902	3	239	0.00601754	7361	0.102088	6592	0.210149	2	156	0.00808091	6748	0.133167	4510	0.157359	7	2828	0.102768	7338	0.266658	2765	0.0884737	13	4183	0.118578	6948	0.104436
COG3335 transposase	COG3335	12139	0.0661603	0	0	0	12139	0.0461677	2827	0.0872878	2	880	0.0221566	3707	0.0514116	2320	0.0739601	0	0	0	2320	0.0457837	1487	0.0518832	1	163	0.00592332	1650	0.0599599	2440	0.0780745	0	0	0	2440	0.0366759
COG3344 RNA-directed DNA polymerase	COG3344	6365	0.0346907	7	6073	0.0764338	12438	0.0473048	258	0.00796613	2	2753	0.0693151	3011	0.0417589	196	0.00624835	4	9951	0.515469	10147	0.200245	2153	0.0751207	4	11963	0.434728	14116	0.512966	1788	0.0572119	4	860	0.0243789	2648	0.0398024
COG3359 Exonuclease-like protein	COG3359	359	0.00195663	0	0	0	359	0.00136537	97	0.00299502	2	547	0.0137724	644	0.0089315	121	0.0038574	1	42	0.00217563	163	0.0032167	239	0.00833899	2	2650	0.0962993	2889	0.104984	550	0.0175987	1	2029	0.0575172	2579	0.0387653
COG3385 transposase	COG3385	38909	0.212063	3	554	0.00697256	39463	0.150088	5993	0.185043	3	190	0.00478382	6183	0.0857508	6031	0.192264	2	143	0.0074075	6174	0.12184	2974	0.103766	1	199	0.00723153	3173	0.115305	2749	0.0879618	5	2112	0.05987	4861	0.0730663
COG3392 Adenine-specific	COG3392	0	0	0	0	0	0	0	8	0.000247012	0	0	0	8	0.00011095	0	0	0	0	0	0	0	3	0.000104673	0	0	0	3	0.000109018	3	9.59932e-05	0	0	0	3	4.50934e-05
COG3415	COG3415	0	0	0	0	0	0	0	8	0.000247012	1	0	0	8	0.00011095	0	0	1	0	0	0	0	3	0.000104673	0	0	0	3	0.000109018	227	0.00726348	1	0	0	227	0.00341206
COG3436 Transposase	COG3436	19485	0.106198	10	187460	2.35934	206945	0.787064	3136	0.0968286	4	37472	0.94347	40608	0.563184	2007	0.0639819	3	28427	1.47254	30434	0.600596	2181	0.0760976	6	20062	0.72904	22243	0.808296	22350	0.715149	6	10893	0.30879	33243	0.49968
COG3464 transposase	COG3464	25825	0.140752	0	0	0	25825	0.098219	4734	0.146169	0	0	0	4734	0.0656549	4701	0.149865	0	0	0	4701	0.0927712	2110	0.0736204	0	0	0	2110	0.0766761	1668	0.0533722	1	36	0.00102051	1704	0.025613
COG3513 Crispr-associated protein, Csn1 family	COG3513	0	0	3	59678	0.751098	59678	0.22697	0	0	1	219	0.00551398	219	0.00303727	0	0	2	2629	0.136184	2629	0.0518816	0	0	0	0	0	0	0	0	0	1	113	0.00320327	113	0.00169852
COG3547 Transposase	COG3547	143787	0.783672	2	195	0.00245424	143982	0.5476	29445	0.909158	1	221	0.00556434	29666	0.411432	24926	0.794625	4	1781	0.092257	26707	0.527046	14699	0.512865	9	4357	0.158331	19056	0.692483	11594	0.370982	3	518	0.014684	12112	0.182057
COG3593 ATP-dependent endonuclease of the OLD	COG3593	23	0.000125355	0	0	0	23	8.74748e-05	2	6.1753e-05	0	0	0	2	2.77376e-05	8	0.000255035	0	0	0	8	0.000157875	2	6.97823e-05	0	0	0	2	7.26787e-05	29	0.000927934	1	1084	0.0307287	1113	0.0167296
COG3649 CRISPR-Associated Protein	COG3649	6189	0.0337315	1	5057	0.0636466	11246	0.0427714	1078	0.0332848	3	1000	0.025178	2078	0.0288194	1026	0.0327082	2	1102	0.0570844	2128	0.0419947	603	0.0210394	3	4902	0.178136	5505	0.200048	432	0.013823	2	3463	0.0981676	3895	0.0585462
COG3663 U mismatch-specific DNA glycosylase	COG3663	0	0	0	0	0	0	0	5	0.000154382	0	0	0	5	6.9344e-05	2	6.37587e-05	0	0	0	2	3.94687e-05	3	0.000104673	0	0	0	3	0.000109018	164	0.00524763	0	0	0	164	0.0024651
COG3666 transposase	COG3666	316	0.00172227	8	5945	0.0748229	6261	0.0238122	67	0.00206872	3	420	0.0105748	487	0.0067541	50	0.00159397	1	302	0.0156438	352	0.0069465	38	0.00132586	2	500	0.0181697	538	0.0195506	1040	0.0332776	6	1317	0.0373337	2357	0.0354284
COG3677 Insertion element	COG3677	838	0.00456729	0	0	0	838	0.00318712	211	0.00651494	0	0	0	211	0.00292632	199	0.00634399	0	0	0	199	0.00392714	104	0.00362868	0	0	0	104	0.00377929	450	0.014399	0	0	0	450	0.006764
COG3727 DNA mismatch endonuclease (vsr)	COG3727	4	2.18009e-05	0	0	0	4	1.5213e-05	0	0	0	0	0	0	0	4	0.000127517	0	0	0	4	7.89375e-05	0	0	0	0	0	0	0	5	0.000159989	0	0	0	5	7.51556e-05
COG3857 The heterodimer acts as both an ATP-dependent DNA helicase and an ATP-dependent, dual-direction single-stranded exonuclease. Recognizes the chi site generating a DNA molecule suitable for the initiation of homologous recombination	COG3857	2102	0.0114564	1	456	0.00573915	2558	0.00972872	2	6.1753e-05	0	0	0	2	2.77376e-05	8	0.000255035	0	0	0	8	0.000157875	227	0.00792029	1	195	0.00708618	422	0.0153352	46	0.0014719	1	3756	0.106473	3802	0.0571483
COG3886 type iii restriction protein res subunit	COG3886	915	0.00498696	0	0	0	915	0.00347997	275	0.00849103	0	0	0	275	0.00381392	274	0.00873494	0	0	0	274	0.00540722	596	0.0207951	1	181	0.00657742	777	0.0282357	480	0.0153589	0	0	0	480	0.00721494
COG3893	COG3893	2	1.09005e-05	0	0	0	2	7.6065e-06	0	0	0	0	0	0	0	0	0	0	0	0	0	0	9	0.00031402	0	0	0	9	0.000327054	1	3.19977e-05	0	0	0	1	1.50311e-05
COG4119 NUDIX hydrolase	COG4119	2546	0.0138763	0	0	0	2546	0.00968308	580	0.0179084	0	0	0	580	0.0080439	528	0.0168323	0	0	0	528	0.0104197	262	0.00914149	0	0	0	262	0.00952091	380	0.0121591	0	0	0	380	0.00571183
COG4227 antirestriction protein	COG4227	0	0	2	7595	0.0955895	7595	0.0288857	0	0	2	2944	0.0741241	2944	0.0408297	0	0	1	2304	0.119349	2304	0.045468	0	0	3	7211	0.262043	7211	0.262043	0	0	1	4197	0.118975	4197	0.0630856
COG4294 UV damage endonuclease	COG4294	563	0.00306848	1	718	0.00903664	1281	0.00487196	144	0.00444621	0	0	0	144	0.00199711	189	0.0060252	0	0	0	189	0.00372979	356	0.0124213	1	296	0.0107565	652	0.0236933	261	0.00835141	0	0	0	261	0.00392312
COG4335 DNA alkylation repair	COG4335	4	2.18009e-05	0	0	0	4	1.5213e-05	0	0	0	0	0	0	0	0	0	0	0	0	0	0	0	0	0	0	0	0	0	0	0	0	0	0	0	0
COG4343 crispr-associated protein, Csa1 family	COG4343	6283	0.0342438	0	0	0	6283	0.0238958	1257	0.0388117	0	0	0	1257	0.0174331	1089	0.0347166	0	0	0	1089	0.0214907	509	0.0177596	0	0	0	509	0.0184967	299	0.00956732	0	0	0	299	0.00449431
COG4389 site-specific recombinase	COG4389	13	7.08529e-05	0	0	0	13	4.94423e-05	2	6.1753e-05	0	0	0	2	2.77376e-05	1	3.18793e-05	0	0	0	1	1.97344e-05	0	0	0	0	0	0	0	8	0.000255982	0	0	0	8	0.000120249
COG4581 helicase	COG4581	18	9.81041e-05	0	0	0	18	6.84585e-05	9	0.000277888	1	110	0.00276958	119	0.00165039	10	0.000318793	0	0	0	10	0.000197344	0	0	2	222	0.00806734	222	0.00806734	6	0.000191986	1	18	0.000510256	24	0.000360747
COG4584 Transposase	COG4584	6082	0.0331483	12	1995	0.0251088	8077	0.0307189	287	0.00886155	3	2405	0.0605531	2692	0.0373348	251	0.00800172	2	215	0.0111371	466	0.00919621	1047	0.0365311	7	2662	0.0967354	3709	0.134783	375	0.0119991	7	770	0.0218276	1145	0.0172106
COG4889	COG4889	0	0	0	0	0	0	0	0	0	0	0	0	0	0	0	0	0	0	0	0	0	0	0	0	0	0	0	0	0	0	1	0	0	0	0
COG4912 DNA alkylation repair enzyme	COG4912	5763	0.0314097	0	0	0	5763	0.0219181	1190	0.036743	1	53	0.00133443	1243	0.0172389	1159	0.0369482	0	0	0	1159	0.0228721	938	0.0327279	0	0	0	938	0.0340863	1018	0.0325737	0	0	0	1018	0.0153017
COG4951 Type III restriction protein, res subunit	COG4951	8	4.36018e-05	1	50	0.000629292	58	0.000220589	0	0	0	0	0	0	0	6	0.000191276	1	66	0.00341885	72	0.00142087	18	0.000628041	0	0	0	18	0.000654109	0	0	0	0	0	0	0
COG4973 Site-specific tyrosine recombinase, which acts by catalyzing the cutting and rejoining of the recombining DNA molecules. The XerC-XerD complex is essential to convert dimers of the bacterial chromosome into monomers to permit their segregation at cell division. It also contributes to the segregational stability of plasmids (By similarity)	COG4973	954	0.00519952	1	1896	0.0238628	2850	0.0108393	197	0.00608267	1	96	0.00241709	293	0.00406356	240	0.00765104	2	335	0.0173532	575	0.0113473	618	0.0215627	1	1187	0.0431348	1805	0.0655925	464	0.0148469	1	1207	0.0342155	1671	0.025117
COG4974 Site-specific tyrosine recombinase, which acts by catalyzing the cutting and rejoining of the recombining DNA molecules. The XerC-XerD complex is essential to convert dimers of the bacterial chromosome into monomers to permit their segregation at cell division. It also contributes to the segregational stability of plasmids (By similarity)	COG4974	1266	0.00689999	1	109	0.00137186	1375	0.00522947	13	0.000401394	2	171	0.00430544	184	0.00255186	31	0.00098826	1	160	0.00828811	191	0.00376926	188	0.00655954	1	27	0.000981163	215	0.00781296	135	0.00431969	1	119	0.00337336	254	0.0038179
COG5377 phage-type endonuclease	COG5377	667	0.0036353	0	0	0	667	0.00253677	0	0	0	0	0	0	0	0	0	0	0	0	0	0	10	0.000348912	1	138	0.00501483	148	0.00537823	5	0.000159989	0	0	0	5	7.51556e-05
COG5421 transposase	COG5421	79432	0.432922	7	6844	0.0861375	86276	0.328129	15634	0.482723	4	7931	0.199687	23565	0.326818	13889	0.442772	1	2299	0.11909	16188	0.31946	8019	0.279792	3	3509	0.127515	11528	0.41892	6178	0.197682	7	10711	0.303631	16889	0.253861
COG5433 Transposase	COG5433	0	0	1	39	0.000490848	39	0.000148327	0	0	0	0	0	0	0	0	0	0	0	0	0	0	0	0	0	0	0	0	0	0	0	0	0	0	0	0
COG5534 replication	COG5534	10	5.45023e-05	0	0	0	10	3.80325e-05	0	0	0	0	0	0	0	0	0	0	0	0	0	0	0	0	0	0	0	0	0	4	0.000127991	0	0	0	4	6.01245e-05
COG5659 transposase	COG5659	10234	0.0557776	1	2097	0.0263925	12331	0.0468979	1751	0.0540647	0	0	0	1751	0.0242843	1762	0.0561714	0	0	0	1762	0.0347719	773	0.0269709	0	0	0	773	0.0280903	571	0.0182707	0	0	0	571	0.00858277
ENOG410XNRT Pfam:Transposase_36	ENOG410XNRT	28214	0.153773	0	0	0	28214	0.107305	5529	0.170716	0	0	0	5529	0.0766806	4765	0.151905	0	0	0	4765	0.0940342	3065	0.106941	1	76	0.00276179	3141	0.114142	2145	0.0686351	0	0	0	2145	0.0322418
ENOG410XP4Z excision repair cross-complementing rodent repair deficiency complementation group	ENOG410XP4Z	0	0	0	0	0	0	0	0	0	0	0	0	0	0	0	0	0	0	0	0	0	2	6.97823e-05	0	0	0	2	7.26787e-05	1	3.19977e-05	0	0	0	1	1.50311e-05
ENOG410XP5C Transposase	ENOG410XP5C	4	2.18009e-05	0	0	0	4	1.5213e-05	1	3.08765e-05	0	0	0	1	1.38688e-05	2	6.37587e-05	0	0	0	2	3.94687e-05	0	0	0	0	0	0	0	2	6.39955e-05	0	0	0	2	3.00622e-05
ENOG410XP9N CRISPR-associated protein TIGR02710 family	ENOG410XP9N	10	5.45023e-05	1	101	0.00127117	111	0.000422161	2	6.1753e-05	0	0	0	2	2.77376e-05	0	0	0	0	0	0	0	0	0	0	0	0	0	0	10	0.000319977	1	74	0.00209772	84	0.00126261
ENOG410XPCD Crispr-associated protein, cse1 family	ENOG410XPCD	0	0	1	32	0.000402747	32	0.000121704	0	0	0	0	0	0	0	0	0	0	0	0	0	0	0	0	0	0	0	0	0	0	0	0	0	0	0	0
ENOG410XPD4 Integrase catalytic subunit	ENOG410XPD4	0	0	2	251	0.00315905	251	0.000954616	0	0	1	70	0.00176246	70	0.000970816	0	0	1	239	0.0123804	239	0.00471651	0	0	2	127	0.0046151	127	0.0046151	0	0	1	317	0.00898617	317	0.00476487
ENOG410XPHC CRISPR-associated protein	ENOG410XPHC	0	0	0	0	0	0	0	2	6.1753e-05	0	0	0	2	2.77376e-05	0	0	0	0	0	0	0	0	0	0	0	0	0	0	6	0.000191986	0	0	0	6	9.01867e-05
ENOG410XPK3 Integrase catalytic subunit	ENOG410XPK3	2	1.09005e-05	0	0	0	2	7.6065e-06	0	0	0	0	0	0	0	0	0	0	0	0	0	0	0	0	0	0	0	0	0	2	6.39955e-05	1	62	0.00175755	64	0.000961992
ENOG410XPMN Plasmid and phage replicative helicase	ENOG410XPMN	3	1.63507e-05	0	0	0	3	1.14098e-05	0	0	0	0	0	0	0	0	0	0	0	0	0	0	0	0	0	0	0	0	0	0	0	0	0	0	0	0
ENOG410XPNN transposase	ENOG410XPNN	1366	0.00744501	1	224774	2.82897	226140	0.860067	337	0.0104054	1	42914	1.08049	43251	0.599839	314	0.0100101	1	39709	2.05695	40023	0.789828	200	0.00697823	1	17070	0.620313	17270	0.627581	240	0.00767945	1	11200	0.317493	11440	0.171956
ENOG410XPQE transposase mutator type	ENOG410XPQE	1	5.45023e-06	0	0	0	1	3.80325e-06	0	0	0	0	0	0	0	0	0	0	0	0	0	0	0	0	0	0	0	0	0	0	0	0	0	0	0	0
ENOG410XPRM CRISPR-associated protein Csd1 family	ENOG410XPRM	1402	0.00764122	1	78	0.000981696	1480	0.00562881	35	0.00108068	0	0	0	35	0.000485408	29	0.000924501	0	0	0	29	0.000572297	168	0.00586172	0	0	0	168	0.00610501	132	0.0042237	0	0	0	132	0.00198411
ENOG410XPU0 Modification methylase EcoRI	ENOG410XPU0	0	0	0	0	0	0	0	0	0	0	0	0	0	0	0	0	0	0	0	0	0	0	0	0	0	0	0	0	2	6.39955e-05	1	179	0.00507421	181	0.00272063
ENOG410XPZV Replication C family protein	ENOG410XPZV	7	3.81516e-05	0	0	0	7	2.66228e-05	0	0	0	0	0	0	0	0	0	0	0	0	0	0	0	0	0	0	0	0	0	0	0	0	0	0	0	0
ENOG410XQ84 DNA methylase n-4 n-6 domain protein	ENOG410XQ84	1062	0.00578814	1	2677	0.0336923	3739	0.0142204	288	0.00889243	0	0	0	288	0.00399421	284	0.00905373	0	0	0	284	0.00560456	1203	0.0419741	1	246	0.00893948	1449	0.0526557	868	0.027774	2	437	0.0123879	1305	0.0196156
ENOG410XQ88 Transposase (IS4 family) protein	ENOG410XQ88	2	1.09005e-05	0	0	0	2	7.6065e-06	1	3.08765e-05	0	0	0	1	1.38688e-05	0	0	0	0	0	0	0	11	0.000383803	1	31	0.00112652	42	0.00152625	2	6.39955e-05	1	84	0.00238119	86	0.00129268
ENOG410XQ9Q CRISPR-Associated Protein	ENOG410XQ9Q	672	0.00366255	1	127	0.0015984	799	0.0030388	42	0.00129681	1	48	0.00120854	90	0.00124819	37	0.00117954	0	0	0	37	0.000730171	213	0.00743182	1	50	0.00181697	263	0.00955725	140	0.00447968	0	0	0	140	0.00210436
ENOG410XQBA Transposase	ENOG410XQBA	0	0	0	0	0	0	0	2	6.1753e-05	0	0	0	2	2.77376e-05	0	0	0	0	0	0	0	0	0	0	0	0	0	0	0	0	0	0	0	0	0
ENOG410XQCP helicase	ENOG410XQCP	2	1.09005e-05	0	0	0	2	7.6065e-06	0	0	0	0	0	0	0	0	0	0	0	0	0	0	0	0	0	0	0	0	0	0	0	1	1807	0.051224	1807	0.0271612
ENOG410XQED Integrase, catalytic region	ENOG410XQED	0	0	0	0	0	0	0	0	0	2	456	0.0114812	456	0.00632417	0	0	0	0	0	0	0	0	0	0	0	0	0	0	0	0	0	0	0	0	0
ENOG410XQN2 DNA helicase	ENOG410XQN2	10	5.45023e-05	0	0	0	10	3.80325e-05	0	0	0	0	0	0	0	2	6.37587e-05	0	0	0	2	3.94687e-05	0	0	0	0	0	0	0	4	0.000127991	0	0	0	4	6.01245e-05
ENOG410XQQ7 helicase domain protein	ENOG410XQQ7	131	0.00071398	3	493	0.00620482	624	0.00237323	61	0.00188347	0	0	0	61	0.000845997	28	0.000892622	0	0	0	28	0.000552562	20	0.000697823	0	0	0	20	0.000726787	22	0.00070395	0	0	0	22	0.000330685
ENOG410XR9Y DNA ligase	ENOG410XR9Y	0	0	0	0	0	0	0	0	0	0	0	0	0	0	1	3.18793e-05	0	0	0	1	1.97344e-05	0	0	0	0	0	0	0	2	6.39955e-05	0	0	0	2	3.00622e-05
ENOG410XRA0 transposase	ENOG410XRA0	0	0	0	0	0	0	0	0	0	0	0	0	0	0	0	0	0	0	0	0	0	0	0	0	0	0	0	0	0	0	1	433	0.0122745	433	0.00650848
ENOG410XRAH Pfam:Transposase_32	ENOG410XRAH	61	0.000332464	1	646	0.00813046	707	0.0026889	48	0.00148207	1	126	0.00317243	174	0.00241317	44	0.00140269	1	109	0.00564628	153	0.00301936	61	0.00212836	1	187	0.00679546	248	0.00901216	0	0	1	44	0.00124729	44	0.000661369
ENOG410XRB0 CRISPR-associated protein, Csy1 family	ENOG410XRB0	1	5.45023e-06	0	0	0	1	3.80325e-06	2	6.1753e-05	0	0	0	2	2.77376e-05	0	0	0	0	0	0	0	0	0	0	0	0	0	0	0	0	0	0	0	0	0
ENOG410XRH6 Integrase	ENOG410XRH6	2	1.09005e-05	0	0	0	2	7.6065e-06	0	0	0	0	0	0	0	0	0	0	0	0	0	0	0	0	0	0	0	0	0	0	0	0	0	0	0	0
ENOG410XRKW Integrase	ENOG410XRKW	51	0.000277962	0	0	0	51	0.000193966	2	6.1753e-05	0	0	0	2	2.77376e-05	33	0.00105202	0	0	0	33	0.000651234	0	0	0	0	0	0	0	14	0.000447968	0	0	0	14	0.000210436
ENOG410XRUF DNA polymerase family A	ENOG410XRUF	0	0	1	12532	0.157726	12532	0.0476623	0	0	0	0	0	0	0	0	0	0	0	0	0	0	0	0	1	472	0.0171522	472	0.0171522	0	0	0	0	0	0	0
ENOG410XRYU CRISPR-associated protein GSU0053	ENOG410XRYU	0	0	0	0	0	0	0	0	0	0	0	0	0	0	0	0	0	0	0	0	0	0	0	0	0	0	0	0	0	0	0	0	0	0	0
ENOG410XS2G CRISPR-associated protein, Csy2 family	ENOG410XS2G	5	2.72511e-05	0	0	0	5	1.90163e-05	0	0	0	0	0	0	0	2	6.37587e-05	0	0	0	2	3.94687e-05	0	0	0	0	0	0	0	2	6.39955e-05	0	0	0	2	3.00622e-05
ENOG410XS38 crispr-associated cxxc_cxxc protein cst1	ENOG410XS38	0	0	0	0	0	0	0	0	0	0	0	0	0	0	0	0	0	0	0	0	0	0	0	0	0	0	0	0	0	0	0	0	0	0	0
ENOG410XS5E transposase	ENOG410XS5E	1197	0.00652392	4	898	0.0113021	2095	0.00796781	20	0.00061753	1	581	0.0146284	601	0.00833515	15	0.00047819	3	2753	0.142607	2768	0.0546247	172	0.00600128	2	620	0.0225304	792	0.0287808	482	0.0154229	6	845	0.0239537	1327	0.0199463
ENOG410XSAS crispr-associated protein, Csx11 family	ENOG410XSAS	6	3.27014e-05	0	0	0	6	2.28195e-05	2	6.1753e-05	0	0	0	2	2.77376e-05	2	6.37587e-05	0	0	0	2	3.94687e-05	114	0.00397759	0	0	0	114	0.00414269	7	0.000223984	0	0	0	7	0.000105218
ENOG410XSIU transposase	ENOG410XSIU	16	8.72036e-05	0	0	0	16	6.0852e-05	0	0	0	0	0	0	0	1	3.18793e-05	0	0	0	1	1.97344e-05	2	6.97823e-05	0	0	0	2	7.26787e-05	0	0	0	0	0	0	0
ENOG410XSSU transposase	ENOG410XSSU	11602	0.0632335	2	443	0.00557553	12045	0.0458102	2574	0.0794761	2	1789	0.0450435	4363	0.0605096	2332	0.0743426	0	0	0	2332	0.0460205	2387	0.0832852	1	824	0.0299436	3211	0.116686	2018	0.0645714	1	493	0.0139753	2511	0.0377431
ENOG410XSZ0 Crispr-associated protein, Csy3 family	ENOG410XSZ0	10	5.45023e-05	0	0	0	10	3.80325e-05	0	0	0	0	0	0	0	4	0.000127517	0	0	0	4	7.89375e-05	0	0	0	0	0	0	0	8	0.000255982	0	0	0	8	0.000120249
ENOG410XT1T Transposase (IS4 family	ENOG410XT1T	0	0	0	0	0	0	0	0	0	0	0	0	0	0	0	0	1	97	0.00502467	97	0.00191423	15	0.000523367	0	0	0	15	0.00054509	3	9.59932e-05	0	0	0	3	4.50934e-05
ENOG410XT9W crispr-associated protein	ENOG410XT9W	8448	0.0460435	0	0	0	8448	0.0321299	1670	0.0515637	0	0	0	1670	0.0231609	1674	0.053366	0	0	0	1674	0.0330353	601	0.0209696	0	0	0	601	0.02184	504	0.0161269	0	0	0	504	0.00757568
ENOG410XTRY IS3 IS66 family element, Orf1 protein	ENOG410XTRY	9159	0.0499186	0	0	0	9159	0.034834	1805	0.055732	0	0	0	1805	0.0250332	1567	0.0499549	0	0	0	1567	0.0309237	929	0.0324139	0	0	0	929	0.0337593	702	0.0224624	0	0	0	702	0.0105518
ENOG410XUAP Bidirectionally degrades single-stranded DNA into large acid-insoluble oligonucleotides, which are then degraded further into small acid-soluble oligonucleotides (By similarity)	ENOG410XUAP	14	7.63032e-05	0	0	0	14	5.32455e-05	0	0	0	0	0	0	0	0	0	0	0	0	0	0	3	0.000104673	0	0	0	3	0.000109018	1	3.19977e-05	0	0	0	1	1.50311e-05
ENOG410XUBY CRISPR (clustered regularly interspaced short palindromic repeat), is an adaptive immune system that provides protection against mobile genetic elements (viruses, transposable elements and conjugative plasmids). CRISPR clusters contain sequences complementary to antecedent mobile elements and target invading nucleic acids. CRISPR clusters are transcribed and processed into CRISPR RNA …	ENOG410XUBY	5	2.72511e-05	0	0	0	5	1.90163e-05	0	0	0	0	0	0	0	0	0	0	0	0	0	0	6	0.000209347	0	0	0	6	0.000218036	0	0	0	0	0	0	0
ENOG410XV7E Transposase (IS4 family) protein	ENOG410XV7E	0	0	1	764	0.00961559	764	0.00290568	0	0	0	0	0	0	0	0	0	0	0	0	0	0	0	0	0	0	0	0	0	0	0	0	0	0	0	0
ENOG410XVBQ CRISPR-associated protein	ENOG410XVBQ	0	0	0	0	0	0	0	0	0	0	0	0	0	0	0	0	0	0	0	0	0	0	0	0	0	0	0	0	0	0	1	25	0.000708689	25	0.000375778
ENOG410XY2V Pfam:Transposase_36	ENOG410XY2V	0	0	0	0	0	0	0	0	0	0	0	0	0	0	0	0	0	0	0	0	0	0	0	0	0	0	0	0	7	0.000223984	0	0	0	7	0.000105218
ENOG410XZ58 Transposase (IS4 family) protein	ENOG410XZ58	4482	0.0244279	1	507	0.00638102	4989	0.0189744	12	0.000370518	1	116	0.00292065	128	0.00177521	14	0.000446311	1	105	0.00543907	119	0.00234839	330	0.0115141	0	0	0	330	0.011992	84	0.00268781	1	512	0.0145139	596	0.00895855
ENOG410XZBU	ENOG410XZBU	6676	0.0363857	1	0	0	6676	0.0253905	890	0.0274801	0	0	0	890	0.0123432	992	0.0316243	0	0	0	992	0.0195765	451	0.0157359	0	0	0	451	0.0163891	326	0.0104313	0	0	0	326	0.00490015
ENOG410Y0FQ DNA methylase	ENOG410Y0FQ	0	0	0	0	0	0	0	0	0	0	0	0	0	0	0	0	0	0	0	0	0	41	0.00143054	0	0	0	41	0.00148991	8	0.000255982	0	0	0	8	0.000120249
ENOG410Y1HG Bidirectionally degrades single-stranded DNA into large acid-insoluble oligonucleotides, which are then degraded further into small acid-soluble oligonucleotides (By similarity)	ENOG410Y1HG	2	1.09005e-05	0	0	0	2	7.6065e-06	0	0	0	0	0	0	0	0	0	0	0	0	0	0	0	0	0	0	0	0	0	0	0	0	0	0	0	0
ENOG410Y1RD Resolvase, N terminal domain	ENOG410Y1RD	0	0	0	0	0	0	0	2	6.1753e-05	0	0	0	2	2.77376e-05	1	3.18793e-05	0	0	0	1	1.97344e-05	2	6.97823e-05	0	0	0	2	7.26787e-05	0	0	0	0	0	0	0
ENOG410Y2BA Transposase, IS4 family protein	ENOG410Y2BA	0	0	1	50	0.000629292	50	0.000190163	0	0	0	0	0	0	0	0	0	0	0	0	0	0	0	0	0	0	0	0	0	0	0	0	0	0	0	0
ENOG410Y31Q helicase	ENOG410Y31Q	23	0.000125355	0	0	0	23	8.74748e-05	0	0	0	0	0	0	0	18	0.000573828	0	0	0	18	0.000355219	0	0	0	0	0	0	0	51	0.00163188	0	0	0	51	0.000766587
ENOG410Y5K6 transposase, IS3 IS911 family protein	ENOG410Y5K6	0	0	0	0	0	0	0	0	0	0	0	0	0	0	0	0	1	240	0.0124322	240	0.00473625	0	0	0	0	0	0	0	0	0	0	0	0	0	0
ENOG410Y6PV Crispr-associated protein, cse4 family	ENOG410Y6PV	11	5.99525e-05	0	0	0	11	4.18358e-05	4	0.000123506	1	54	0.00135961	58	0.00080439	2	6.37587e-05	1	67	0.00347065	69	0.00136167	1	3.48912e-05	0	0	0	1	3.63394e-05	17	0.000543961	0	0	0	17	0.000255529
ENOG410YA7E transposase	ENOG410YA7E	4	2.18009e-05	0	0	0	4	1.5213e-05	33	0.00101892	0	0	0	33	0.00045767	0	0	0	0	0	0	0	10	0.000348912	0	0	0	10	0.000363394	773	0.0247342	0	0	0	773	0.0116191
ENOG410YAJ5 integrase family	ENOG410YAJ5	0	0	0	0	0	0	0	0	0	0	0	0	0	0	0	0	1	21	0.00108781	21	0.000414422	0	0	0	0	0	0	0	0	0	0	0	0	0	0
ENOG410YHG9 exonuclease rnase t and DNA polymerase iii	ENOG410YHG9	0	0	0	0	0	0	0	0	0	1	66	0.00166175	66	0.000915341	0	0	0	0	0	0	0	0	0	0	0	0	0	0	0	0	0	0	0	0	0
ENOG410YJP3 transposase (IS4,)	ENOG410YJP3	0	0	0	0	0	0	0	5	0.000154382	0	0	0	5	6.9344e-05	0	0	0	0	0	0	0	2	6.97823e-05	0	0	0	2	7.26787e-05	138	0.00441569	0	0	0	138	0.00207429
ENOG410YK1B DNA methylase n-4 n-6 domain protein	ENOG410YK1B	0	0	0	0	0	0	0	0	0	0	0	0	0	0	0	0	0	0	0	0	0	0	0	0	0	0	0	0	2	6.39955e-05	0	0	0	2	3.00622e-05
ENOG410YNEE DNA polymerase III (delta' subunit)	ENOG410YNEE	0	0	1	66	0.000830666	66	0.000251015	0	0	0	0	0	0	0	0	0	0	0	0	0	0	0	0	0	0	0	0	0	0	0	0	0	0	0	0
ENOG410YPS3 Transposase (IS4 family	ENOG410YPS3	0	0	0	0	0	0	0	2	6.1753e-05	0	0	0	2	2.77376e-05	0	0	0	0	0	0	0	0	0	0	0	0	0	0	3	9.59932e-05	0	0	0	3	4.50934e-05
ENOG410YQW4 transposase	ENOG410YQW4	15260	0.0831705	5	4524	0.0569384	19784	0.0752435	2862	0.0883685	0	0	0	2862	0.0396925	2682	0.0855004	1	635	0.0328934	3317	0.0654589	1471	0.0513249	2	1925	0.0699533	3396	0.123408	1649	0.0527643	2	3291	0.0932918	4940	0.0742537
ENOG410Z4Y8 transposase	ENOG410Z4Y8	2	1.09005e-05	0	0	0	2	7.6065e-06	0	0	0	0	0	0	0	0	0	0	0	0	0	0	0	0	0	0	0	0	0	0	0	0	0	0	0	0
ENOG410Z7GN DNA-directed DNA polymerase, B	ENOG410Z7GN	1799	0.00980496	0	0	0	1799	0.00684205	474	0.0146355	0	0	0	474	0.00657381	470	0.0149833	0	0	0	470	0.00927515	1969	0.0687007	0	0	0	1969	0.0715522	2255	0.0721549	0	0	0	2255	0.0338952
ENOG410ZI83 CRISPR-associated protein (Cas_Cmr5)	ENOG410ZI83	0	0	0	0	0	0	0	0	0	0	0	0	0	0	0	0	0	0	0	0	0	2	6.97823e-05	0	0	0	2	7.26787e-05	0	0	0	0	0	0	0
ENOG410ZIGI Transposase (IS4 family protein)	ENOG410ZIGI	0	0	0	0	0	0	0	0	0	0	0	0	0	0	0	0	0	0	0	0	0	0	0	2	1179	0.0428441	1179	0.0428441	0	0	0	0	0	0	0
ENOG410ZM4J Transposase	ENOG410ZM4J	587	0.00319928	0	0	0	587	0.00223251	62	0.00191434	0	0	0	62	0.000859865	62	0.00197652	0	0	0	62	0.00122353	531	0.0185272	0	0	0	531	0.0192962	210	0.00671952	0	0	0	210	0.00315654
ENOG410ZMA8 transposase	ENOG410ZMA8	0	0	0	0	0	0	0	0	0	0	0	0	0	0	0	0	0	0	0	0	0	0	0	0	0	0	0	0	1	3.19977e-05	0	0	0	1	1.50311e-05
ENOG410ZTIP	ENOG410ZTIP	5	2.72511e-05	0	0	0	5	1.90163e-05	0	0	0	0	0	0	0	0	0	0	0	0	0	0	0	0	0	0	0	0	0	0	0	0	0	0	0	0
ENOG410ZW5I CRISPR-Associated Protein	ENOG410ZW5I	2	1.09005e-05	0	0	0	2	7.6065e-06	0	0	0	0	0	0	0	0	0	0	0	0	0	0	2	6.97823e-05	0	0	0	2	7.26787e-05	3	9.59932e-05	0	0	0	3	4.50934e-05
ENOG410ZWHG crispr-associated protein	ENOG410ZWHG	4	2.18009e-05	1	73	0.000918767	77	0.00029285	0	0	0	0	0	0	0	2	6.37587e-05	0	0	0	2	3.94687e-05	14	0.000488476	0	0	0	14	0.000508751	2	6.39955e-05	0	0	0	2	3.00622e-05
ENOG410ZX8D DNA polymerase beta domain protein region	ENOG410ZX8D	69	0.000376066	0	0	0	69	0.000262424	0	0	0	0	0	0	0	0	0	0	0	0	0	0	7	0.000244238	0	0	0	7	0.000254376	2	6.39955e-05	0	0	0	2	3.00622e-05
ENOG410ZXPM crispr-associated protein	ENOG410ZXPM	0	0	0	0	0	0	0	0	0	0	0	0	0	0	0	0	0	0	0	0	0	3	0.000104673	0	0	0	3	0.000109018	0	0	0	0	0	0	0
ENOG410ZY8V CRISPR (clustered regularly interspaced short palindromic repeat), is an adaptive immune system that provides protection against mobile genetic elements (viruses, transposable elements and conjugative plasmids). CRISPR clusters contain sequences complementary to antecedent mobile elements and target invading nucleic acids. CRISPR clusters are transcribed and processed into CRISPR RNA …	ENOG410ZY8V	158	0.000861136	0	0	0	158	0.000600914	42	0.00129681	0	0	0	42	0.000582489	28	0.000892622	0	0	0	28	0.000552562	14	0.000488476	0	0	0	14	0.000508751	13	0.00041597	0	0	0	13	0.000195405
ENOG410ZZUX CRISPR-associated protein (Cas_APE2256)	ENOG410ZZUX	2	1.09005e-05	0	0	0	2	7.6065e-06	0	0	0	0	0	0	0	0	0	0	0	0	0	0	18	0.000628041	0	0	0	18	0.000654109	2	6.39955e-05	0	0	0	2	3.00622e-05
ENOG41101JM transposase, IS3 IS911 family protein	ENOG41101JM	2	1.09005e-05	0	0	0	2	7.6065e-06	0	0	0	0	0	0	0	0	0	0	0	0	0	0	0	0	0	0	0	0	0	0	0	0	0	0	0	0
ENOG41102CA transposase	ENOG41102CA	0	0	0	0	0	0	0	0	0	0	0	0	0	0	0	0	0	0	0	0	0	0	0	0	0	0	0	0	0	0	1	45	0.00127564	45	0.0006764
ENOG41102SW Bidirectionally degrades single-stranded DNA into large acid-insoluble oligonucleotides, which are then degraded further into small acid-soluble oligonucleotides (By similarity)	ENOG41102SW	3	1.63507e-05	0	0	0	3	1.14098e-05	4	0.000123506	0	0	0	4	5.54752e-05	0	0	0	0	0	0	0	0	0	0	0	0	0	0	0	0	0	0	0	0	0
ENOG41103Q3 Integrase	ENOG41103Q3	10	5.45023e-05	0	0	0	10	3.80325e-05	0	0	0	0	0	0	0	2	6.37587e-05	0	0	0	2	3.94687e-05	349	0.012177	0	0	0	349	0.0126824	18	0.000575959	0	0	0	18	0.00027056
ENOG4110A1H site-specific recombinase, phage integrase family	ENOG4110A1H	4	2.18009e-05	0	0	0	4	1.5213e-05	0	0	0	0	0	0	0	0	0	0	0	0	0	0	0	0	0	0	0	0	0	0	0	0	0	0	0	0
ENOG4110BMY CRISPR-associated helicase	ENOG4110BMY	23	0.000125355	1	218	0.00274371	241	0.000916583	14	0.000432271	0	0	0	14	0.000194163	4	0.000127517	0	0	0	4	7.89375e-05	8	0.000279129	1	848	0.0308158	856	0.0311065	363	0.0116152	1	623	0.0176605	986	0.0148207
ENOG4110J1B CRISPR-associated protein, NE0113 family	ENOG4110J1B	0	0	0	0	0	0	0	0	0	0	0	0	0	0	0	0	0	0	0	0	0	0	0	1	83	0.00301617	83	0.00301617	0	0	0	0	0	0	0
ENOG4110T0X CRISPR-associated protein Cmr3	ENOG4110T0X	0	0	1	177	0.00222769	177	0.000673175	1	3.08765e-05	0	0	0	1	1.38688e-05	0	0	0	0	0	0	0	0	0	1	840	0.0305251	840	0.0305251	32	0.00102393	0	0	0	32	0.000480996
ENOG4110TSY Transposase for insertion sequence element	ENOG4110TSY	1650	0.00899287	0	0	0	1650	0.00627536	385	0.0118874	0	0	0	385	0.00533949	458	0.0146007	0	0	0	458	0.00903834	415	0.0144798	0	0	0	415	0.0150808	264	0.0084474	0	0	0	264	0.00396822
ENOG4110W1K dna polymerase iii delta	ENOG4110W1K	0	0	0	0	0	0	0	0	0	0	0	0	0	0	0	0	0	0	0	0	0	6	0.000209347	0	0	0	6	0.000218036	2	6.39955e-05	0	0	0	2	3.00622e-05
ENOG4110Z4K transposase	ENOG4110Z4K	40	0.000218009	0	0	0	40	0.00015213	0	0	0	0	0	0	0	2	6.37587e-05	0	0	0	2	3.94687e-05	6	0.000209347	0	0	0	6	0.000218036	6	0.000191986	1	38	0.00107721	44	0.000661369
ENOG4111119	ENOG4111119	0	0	0	0	0	0	0	7	0.000216135	0	0	0	7	9.70816e-05	0	0	0	0	0	0	0	0	0	0	0	0	0	0	83	0.00265581	0	0	0	83	0.00124758
ENOG4111C4X Transposase (IS4 family) protein	ENOG4111C4X	0	0	1	371	0.00466935	371	0.00141101	0	0	1	69	0.00173728	69	0.000956947	0	0	0	0	0	0	0	0	0	1	140	0.00508751	140	0.00508751	0	0	0	0	0	0	0
ENOG4111CEC	ENOG4111CEC	8	4.36018e-05	0	0	0	8	3.0426e-05	7	0.000216135	0	0	0	7	9.70816e-05	6	0.000191276	0	0	0	6	0.000118406	0	0	0	0	0	0	0	269	0.00860739	0	0	0	269	0.00404337
ENOG4111EZ8 Crispr-associated ramp protein, Cmr1 family	ENOG4111EZ8	10	5.45023e-05	0	0	0	10	3.80325e-05	0	0	0	0	0	0	0	0	0	0	0	0	0	0	81	0.00282618	0	0	0	81	0.00294349	9	0.00028798	0	0	0	9	0.00013528
ENOG4111FJH Exonuclease	ENOG4111FJH	0	0	0	0	0	0	0	0	0	1	2985	0.0751564	2985	0.0413984	0	0	0	0	0	0	0	0	0	0	0	0	0	0	0	0	0	0	0	0	0
ENOG4111FS1 Transposase (IS4 family protein)	ENOG4111FS1	0	0	0	0	0	0	0	0	0	0	0	0	0	0	0	0	0	0	0	0	0	0	0	1	497	0.0180607	497	0.0180607	0	0	1	42	0.0011906	42	0.000631307
ENOG4111FTS CRISPR-associated protein, Csx3 family	ENOG4111FTS	595	0.00324288	0	0	0	595	0.00226293	134	0.00413745	0	0	0	134	0.00185842	119	0.00379364	0	0	0	119	0.00234839	63	0.00219814	0	0	0	63	0.00228938	40	0.00127991	0	0	0	40	0.000601245
ENOG4111FWF CRISPR-Associated Protein	ENOG4111FWF	512	0.00279052	0	0	0	512	0.00194726	0	0	0	0	0	0	0	0	0	0	0	0	0	0	4	0.000139565	0	0	0	4	0.000145357	4	0.000127991	0	0	0	4	6.01245e-05
ENOG4111H7A Transposase	ENOG4111H7A	17038	0.092861	0	0	0	17038	0.0647998	3263	0.10075	0	0	0	3263	0.0452539	2869	0.0914618	0	0	0	2869	0.0566179	1612	0.0562446	0	0	0	1612	0.0585791	3500	0.111992	0	0	0	3500	0.0526089
ENOG4111HA0 CRISPR-associated protein, TM1812 family	ENOG4111HA0	8	4.36018e-05	2	260	0.00327232	268	0.00101927	0	0	0	0	0	0	0	0	0	0	0	0	0	0	0	0	0	0	0	0	0	8	0.000255982	0	0	0	8	0.000120249
ENOG4111HFY transposase	ENOG4111HFY	0	0	0	0	0	0	0	0	0	0	0	0	0	0	0	0	0	0	0	0	0	8	0.000279129	0	0	0	8	0.000290715	0	0	0	0	0	0	0
ENOG4111I24 crispr-associated protein cas5	ENOG4111I24	621	0.00338459	0	0	0	621	0.00236182	0	0	0	0	0	0	0	0	0	0	0	0	0	0	7	0.000244238	0	0	0	7	0.000254376	2	6.39955e-05	0	0	0	2	3.00622e-05
ENOG4111I40 Csm4 family CRISPR-associated ramp protein	ENOG4111I40	6	3.27014e-05	0	0	0	6	2.28195e-05	0	0	0	0	0	0	0	0	0	0	0	0	0	0	17	0.00059315	0	0	0	17	0.000617769	4	0.000127991	0	0	0	4	6.01245e-05
ENOG4111J2V Transposase	ENOG4111J2V	2	1.09005e-05	0	0	0	2	7.6065e-06	0	0	0	0	0	0	0	0	0	0	0	0	0	0	0	0	0	0	0	0	0	1	3.19977e-05	0	0	0	1	1.50311e-05
ENOG4111J3K Transposase	ENOG4111J3K	12	6.54027e-05	0	0	0	12	4.5639e-05	4	0.000123506	0	0	0	4	5.54752e-05	0	0	0	0	0	0	0	0	0	0	0	0	0	0	91	0.00291179	0	0	0	91	0.00136783
ENOG4111JEJ crispr-associated protein	ENOG4111JEJ	4	2.18009e-05	0	0	0	4	1.5213e-05	0	0	0	0	0	0	0	0	0	0	0	0	0	0	0	0	0	0	0	0	0	6	0.000191986	0	0	0	6	9.01867e-05
ENOG4111JFI Transposase	ENOG4111JFI	5	2.72511e-05	0	0	0	5	1.90163e-05	0	0	0	0	0	0	0	0	0	0	0	0	0	0	9	0.00031402	0	0	0	9	0.000327054	1	3.19977e-05	0	0	0	1	1.50311e-05
ENOG4111JKG transposase IS605 OrfB family	ENOG4111JKG	52	0.000283412	0	0	0	52	0.000197769	0	0	0	0	0	0	0	0	0	0	0	0	0	0	13	0.000453585	0	0	0	13	0.000472412	3	9.59932e-05	0	0	0	3	4.50934e-05
ENOG4111JRC Pfam:Transposase_17	ENOG4111JRC	0	0	0	0	0	0	0	0	0	1	60	0.00151068	60	0.000832128	0	0	0	0	0	0	0	2	6.97823e-05	0	0	0	2	7.26787e-05	0	0	0	0	0	0	0
ENOG4111K80 CRISPR-Associated Protein	ENOG4111K80	29	0.000158057	0	0	0	29	0.000110294	29	0.000895418	0	0	0	29	0.000402195	14	0.000446311	0	0	0	14	0.000276281	4	0.000139565	0	0	0	4	0.000145357	556	0.0177907	0	0	0	556	0.0083573
ENOG4111KDC transposase	ENOG4111KDC	11	5.99525e-05	0	0	0	11	4.18358e-05	6	0.000185259	0	0	0	6	8.32128e-05	5	0.000159397	0	0	0	5	9.86718e-05	1	3.48912e-05	0	0	0	1	3.63394e-05	0	0	0	0	0	0	0
ENOG4111KHT CRISPR-associated Cas5e family protein	ENOG4111KHT	28	0.000152606	0	0	0	28	0.000106491	2	6.1753e-05	0	0	0	2	2.77376e-05	10	0.000318793	0	0	0	10	0.000197344	2	6.97823e-05	0	0	0	2	7.26787e-05	149	0.00476766	1	77	0.00218276	226	0.00339703
ENOG4111KZZ exonuclease rnase t and DNA polymerase iii	ENOG4111KZZ	8	4.36018e-05	0	0	0	8	3.0426e-05	0	0	0	0	0	0	0	0	0	0	0	0	0	0	2	6.97823e-05	0	0	0	2	7.26787e-05	0	0	0	0	0	0	0
ENOG4111PIZ Pyrimidine dimer DNA glycosylase	ENOG4111PIZ	6	3.27014e-05	0	0	0	6	2.28195e-05	0	0	0	0	0	0	0	0	0	0	0	0	0	0	0	0	0	0	0	0	0	3	9.59932e-05	0	0	0	3	4.50934e-05
ENOG4111Q4Y Adenine-specific	ENOG4111Q4Y	27	0.000147156	0	0	0	27	0.000102688	5	0.000154382	0	0	0	5	6.9344e-05	12	0.000382552	0	0	0	12	0.000236812	36	0.00125608	0	0	0	36	0.00130822	23	0.000735948	0	0	0	23	0.000345716
ENOG4111QIN DNA polymerase III, delta'	ENOG4111QIN	6	3.27014e-05	0	0	0	6	2.28195e-05	6	0.000185259	0	0	0	6	8.32128e-05	4	0.000127517	0	0	0	4	7.89375e-05	0	0	0	0	0	0	0	2	6.39955e-05	0	0	0	2	3.00622e-05
ENOG4111RBH Involved in DNA repair and RecF pathway recombination (By similarity)	ENOG4111RBH	1	5.45023e-06	0	0	0	1	3.80325e-06	2	6.1753e-05	0	0	0	2	2.77376e-05	0	0	0	0	0	0	0	3	0.000104673	0	0	0	3	0.000109018	2	6.39955e-05	0	0	0	2	3.00622e-05
ENOG4111RQG	ENOG4111RQG	0	0	0	0	0	0	0	0	0	0	0	0	0	0	0	0	0	0	0	0	0	2	6.97823e-05	0	0	0	2	7.26787e-05	0	0	0	0	0	0	0
ENOG4111USC Transposase (IS4 family	ENOG4111USC	0	0	1	72	0.000906181	72	0.000273834	0	0	0	0	0	0	0	0	0	0	0	0	0	0	0	0	0	0	0	0	0	0	0	0	0	0	0	0
ENOG4111USX Involved in DNA repair and RecF pathway recombination (By similarity)	ENOG4111USX	6	3.27014e-05	0	0	0	6	2.28195e-05	0	0	0	0	0	0	0	0	0	0	0	0	0	0	0	0	0	0	0	0	0	1	3.19977e-05	0	0	0	1	1.50311e-05
ENOG4111UUE Transposase is3 is911 family protein	ENOG4111UUE	0	0	0	0	0	0	0	0	0	0	0	0	0	0	0	0	0	0	0	0	0	0	0	0	0	0	0	0	0	0	0	0	0	0	0
ENOG4111UZ8 IS66 Orf2 family protein	ENOG4111UZ8	8	4.36018e-05	0	0	0	8	3.0426e-05	0	0	0	0	0	0	0	0	0	0	0	0	0	0	0	0	0	0	0	0	0	2	6.39955e-05	0	0	0	2	3.00622e-05
ENOG4111V8A transposase	ENOG4111V8A	0	0	0	0	0	0	0	0	0	0	0	0	0	0	0	0	0	0	0	0	0	0	0	0	0	0	0	0	1	3.19977e-05	0	0	0	1	1.50311e-05
ENOG4111VHR CRISPR-associated protein cas2	ENOG4111VHR	10	5.45023e-05	0	0	0	10	3.80325e-05	2	6.1753e-05	0	0	0	2	2.77376e-05	2	6.37587e-05	0	0	0	2	3.94687e-05	2	6.97823e-05	0	0	0	2	7.26787e-05	7	0.000223984	0	0	0	7	0.000105218
ENOG4111XRF CRISPR (clustered regularly interspaced short palindromic repeat), is an adaptive immune system that provides protection against mobile genetic elements (viruses, transposable elements and conjugative plasmids). CRISPR clusters contain sequences complementary to antecedent mobile elements and target invading nucleic acids. CRISPR clusters are transcribed and processed into CRISPR RNA …	ENOG4111XRF	116	0.000632226	0	0	0	116	0.000441177	0	0	0	0	0	0	0	0	0	0	0	0	0	0	2	6.97823e-05	0	0	0	2	7.26787e-05	2	6.39955e-05	0	0	0	2	3.00622e-05
ENOG4111Z2E transposase IS3 IS911 family protein	ENOG4111Z2E	11	5.99525e-05	0	0	0	11	4.18358e-05	0	0	0	0	0	0	0	0	0	0	0	0	0	0	53	0.00184923	0	0	0	53	0.00192599	5	0.000159989	0	0	0	5	7.51556e-05
ENOG4111ZA9 CRISPR-associated protein Csc2	ENOG4111ZA9	15	8.17534e-05	1	313	0.00393937	328	0.00124747	13	0.000401394	0	0	0	13	0.000180294	0	0	0	0	0	0	0	2	6.97823e-05	0	0	0	2	7.26787e-05	284	0.00908735	0	0	0	284	0.00426884
ENOG4112082 CRISPR-associated protein Cse2 (CRISPR_cse2)	ENOG4112082	7	3.81516e-05	0	0	0	7	2.66228e-05	0	0	0	0	0	0	0	0	0	0	0	0	0	0	3	0.000104673	0	0	0	3	0.000109018	0	0	0	0	0	0	0
ENOG41120MX CRISPR-associated RAMP protein, Csm5 family	ENOG41120MX	0	0	0	0	0	0	0	0	0	0	0	0	0	0	0	0	1	60	0.00310804	60	0.00118406	0	0	1	118	0.00428804	118	0.00428804	0	0	0	0	0	0	0
ENOG41120R3 CRISPR-associated RAMP protein	ENOG41120R3	0	0	0	0	0	0	0	0	0	0	0	0	0	0	0	0	0	0	0	0	0	0	0	0	0	0	0	0	2	6.39955e-05	0	0	0	2	3.00622e-05
ENOG41121BK Transposase	ENOG41121BK	25013	0.136327	1	167	0.00210184	25180	0.0957659	4457	0.137616	0	0	0	4457	0.0618132	4329	0.138006	0	0	0	4329	0.0854301	2218	0.0773886	0	0	0	2218	0.0806007	5539	0.177235	0	0	0	5539	0.0832574
ENOG41121NU DNA binding domain protein, excisionase family	ENOG41121NU	39	0.000212559	0	0	0	39	0.000148327	8	0.000247012	0	0	0	8	0.00011095	4	0.000127517	0	0	0	4	7.89375e-05	13	0.000453585	0	0	0	13	0.000472412	19	0.000607957	0	0	0	19	0.000285591
ENOG41121PX transposase	ENOG41121PX	20	0.000109005	0	0	0	20	7.6065e-05	24	0.000741036	0	0	0	24	0.000332851	10	0.000318793	0	0	0	10	0.000197344	5	0.000174456	0	0	0	5	0.000181697	0	0	0	0	0	0	0
ENOG41122JY CRISPR (clustered regularly interspaced short palindromic repeat), is an adaptive immune system that provides protection against mobile genetic elements (viruses, transposable elements and conjugative plasmids). CRISPR clusters contain sequences complementary to antecedent mobile elements and target invading nucleic acids. CRISPR clusters are transcribed and processed into CRISPR RNA …	ENOG41122JY	7	3.81516e-05	0	0	0	7	2.66228e-05	0	0	0	0	0	0	0	0	0	0	0	0	0	0	16	0.000558259	0	0	0	16	0.00058143	5	0.000159989	0	0	0	5	7.51556e-05
ENOG41122MV crispr-associated protein	ENOG41122MV	346	0.00188578	0	0	0	346	0.00131592	0	0	0	0	0	0	0	0	0	0	0	0	0	0	9	0.00031402	0	0	0	9	0.000327054	9	0.00028798	0	0	0	9	0.00013528
ENOG411230V transposase, IS3 IS911 family protein	ENOG411230V	2	1.09005e-05	0	0	0	2	7.6065e-06	0	0	0	0	0	0	0	0	0	0	0	0	0	0	0	0	0	0	0	0	0	0	0	0	0	0	0	0
ENOG41123DA DNA packaging protein	ENOG41123DA	203	0.0011064	0	0	0	203	0.00077206	9	0.000277888	0	0	0	9	0.000124819	10	0.000318793	0	0	0	10	0.000197344	32	0.00111652	0	0	0	32	0.00116286	7	0.000223984	0	0	0	7	0.000105218
ENOG41123GT IS4 family Transposase	ENOG41123GT	37	0.000201658	0	0	0	37	0.00014072	2	6.1753e-05	0	0	0	2	2.77376e-05	7	0.000223155	0	0	0	7	0.000138141	2	6.97823e-05	0	0	0	2	7.26787e-05	29	0.000927934	0	0	0	29	0.000435902
ENOG411247V Transposase (IS4 family) protein	ENOG411247V	0	0	0	0	0	0	0	0	0	0	0	0	0	0	0	0	0	0	0	0	0	0	0	1	131	0.00476046	131	0.00476046	0	0	1	27	0.000765384	27	0.00040584
ENOG41125VB CRISPR-associated protein, Cmr5 family	ENOG41125VB	0	0	0	0	0	0	0	0	0	0	0	0	0	0	0	0	0	0	0	0	0	2	6.97823e-05	0	0	0	2	7.26787e-05	36	0.00115192	0	0	0	36	0.00054112
ENOG411273J Transposase OrfB	ENOG411273J	16	8.72036e-05	0	0	0	16	6.0852e-05	1	3.08765e-05	0	0	0	1	1.38688e-05	2	6.37587e-05	0	0	0	2	3.94687e-05	17	0.00059315	0	0	0	17	0.000617769	3	9.59932e-05	0	0	0	3	4.50934e-05
ENOG41129C5 transposase	ENOG41129C5	0	0	0	0	0	0	0	17	0.0005249	0	0	0	17	0.00023577	0	0	0	0	0	0	0	4	0.000139565	0	0	0	4	0.000145357	306	0.0097913	0	0	0	306	0.00459952
ENOG41129T4 Transposase	ENOG41129T4	0	0	0	0	0	0	0	0	0	0	0	0	0	0	0	0	0	0	0	0	0	0	0	1	78	0.00283447	78	0.00283447	0	0	0	0	0	0	0
ENOG4112A4J DNA polymerase beta domain protein region	ENOG4112A4J	5	2.72511e-05	0	0	0	5	1.90163e-05	0	0	0	0	0	0	0	2	6.37587e-05	0	0	0	2	3.94687e-05	0	0	0	0	0	0	0	4	0.000127991	0	0	0	4	6.01245e-05
ENOG4112CNV Transposase (IS4 family) protein	ENOG4112CNV	0	0	1	206	0.00259268	206	0.00078347	0	0	1	122	0.00307172	122	0.00169199	0	0	1	42	0.00217563	42	0.000828843	0	0	0	0	0	0	0	0	0	1	38	0.00107721	38	0.000571183
ENOG4112DBD Site-specific recombinase, phage integrase family	ENOG4112DBD	0	0	1	94	0.00118307	94	0.000357506	0	0	0	0	0	0	0	0	0	0	0	0	0	0	0	0	0	0	0	0	0	0	0	0	0	0	0	0
COG0037 Ligates lysine onto the cytidine present at position 34 of the AUA codon-specific tRNA(Ile) that contains the anticodon CAU, in an ATP-dependent manner. Cytidine is converted to lysidine, thus changing the amino acid specificity of the tRNA from methionine to isoleucine (By similarity)	COG0037	13126	0.0715397	4	432	0.00543709	13558	0.0515645	2210	0.068237	5	2242	0.0564491	4452	0.0617439	2202	0.0701983	1	72	0.00372965	2274	0.0448759	1941	0.0677238	2	2985	0.108473	4926	0.179008	2000	0.0639955	3	457	0.0129548	2457	0.0369315
COG0206 Essential cell division protein that forms a contractile ring structure (Z ring) at the future cell division site. The regulation of the ring assembly controls the timing and the location of cell division. One of the functions of the FtsZ ring is to recruit other cell division proteins to the septum to produce a new cell wall between the dividing cells. Binds GTP and shows GTPase activity…	COG0206	28361	0.154574	4	3144	0.0395699	31505	0.119821	5210	0.160866	3	1800	0.0453204	7010	0.0972203	5299	0.168929	1	1216	0.0629896	6515	0.128569	5563	0.1941	5	3025	0.109927	8588	0.312082	5122	0.163892	4	1977	0.0560431	7099	0.106706
COG0239 inorganic anion transmembrane transporter activity	COG0239	2	1.09005e-05	0	0	0	2	7.6065e-06	14	0.000432271	0	0	0	14	0.000194163	4	0.000127517	0	0	0	4	7.89375e-05	4	0.000139565	0	0	0	4	0.000145357	232	0.00742347	0	0	0	232	0.00348722
COG0424 Maf-like protein	COG0424	411	0.00224004	0	0	0	411	0.00156314	22	0.000679283	0	0	0	22	0.000305114	8	0.000255035	0	0	0	8	0.000157875	60	0.00209347	0	0	0	60	0.00218036	279	0.00892737	0	0	0	279	0.00419368
COG0445 NAD-binding protein involved in the addition of a carboxymethylaminomethyl (cmnm) group at the wobble position (U34) of certain tRNAs, forming tRNA-cmnm(5)s(2)U34 (By similarity)	COG0445	1666	0.00908008	6	7266	0.0914488	8932	0.0339706	37	0.00114243	1	2432	0.0612329	2469	0.0342421	75	0.00239095	3	615	0.0318574	690	0.0136167	309	0.0107814	3	1887	0.0685724	2196	0.0798012	107	0.00342376	5	1653	0.0468585	1760	0.0264548
COG0455 site-determining protein	COG0455	1754	0.0095597	1	2863	0.0360333	4617	0.0175596	278	0.00858366	1	345	0.00868641	623	0.00864026	320	0.0102014	1	461	0.0238801	781	0.0154125	685	0.0239004	2	1022	0.0371388	1707	0.0620313	567	0.0181427	2	1424	0.0403669	1991	0.029927
COG0489 ATP-binding protein	COG0489	11620	0.0633316	6	1580	0.0198856	13200	0.0502029	2054	0.0634203	1	325	0.00818285	2379	0.0329939	1967	0.0627067	1	130	0.00673409	2097	0.041383	1530	0.0533835	1	185	0.00672278	1715	0.062322	1377	0.0440609	3	304	0.00861765	1681	0.0252673
COG0772 Cell Division Protein	COG0772	1437	0.00783198	1	132	0.00166133	1569	0.0059673	30	0.000926294	0	0	0	30	0.000416064	65	0.00207216	2	112	0.00580168	177	0.00349298	212	0.00739693	1	150	0.0054509	362	0.0131548	66	0.00211185	1	77	0.00218276	143	0.00214945
[truncated: 2,322 more rows]

## Sheet: B.3 - read counts
Hier werden die read counts per identifizierten taxa basierend auf der contig annotation only dargestellt. Diese Daten werden benötigt, um die contig matches in read counts umzurechnen (für taxa/fct)
[truncated: 1,752 more rows]

[truncated: 6 more sheets: B.4 - Functional catalog, B.5 - Pathways , B.6.1 - MAGs Illumina, B.6.2 - MAGs hybrid, B.6.3 - compared-MAGs, B.7 - DSMZ hybrid MAGs]
